# Supplementary material
Source: publisher figshare collection journal article supplement (https://diabetesjournals.figshare.com/articles/dataset/_/20112998)

Supplementary File 4 — Exposure: Cardiometabolic traits. Outcome: Corrected Insulin Response adjusted for ISI

**Exposure: Body Mass Index, Outcome: Corrected Insulin Response adjusted for ISI**  
**Figures of Forest Plot, Comparison of Different MR Methods, Funnel Plot and Leave-one-out Sensitivity Analysis**

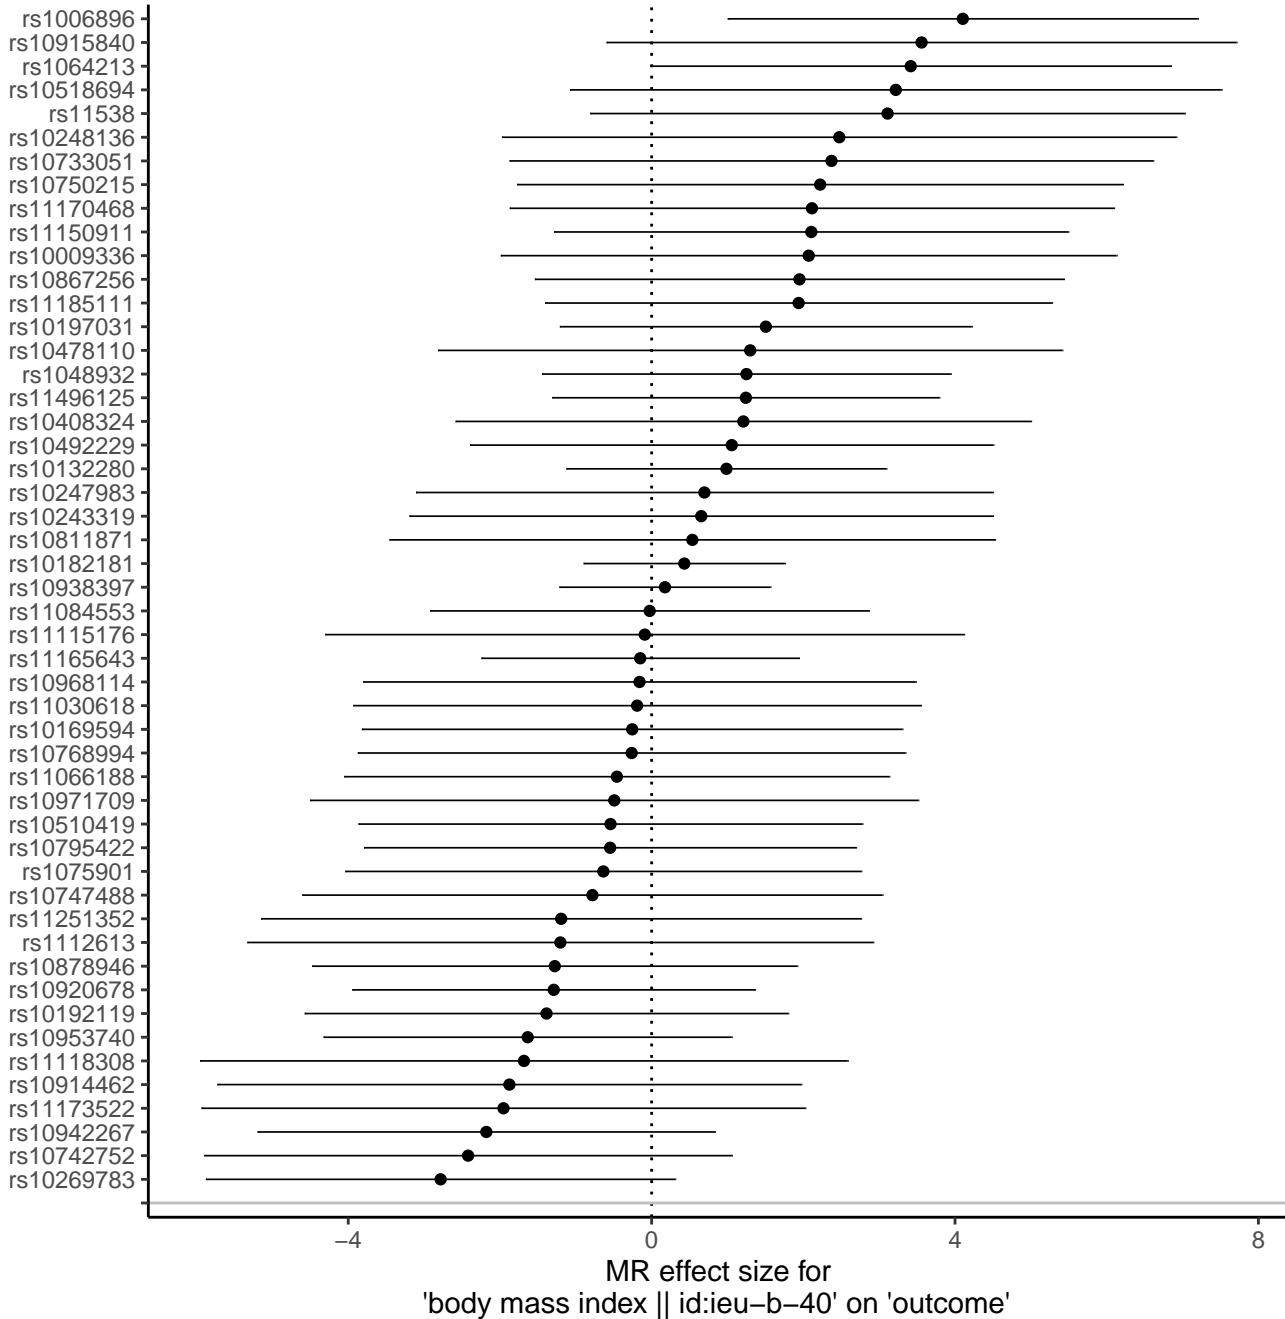

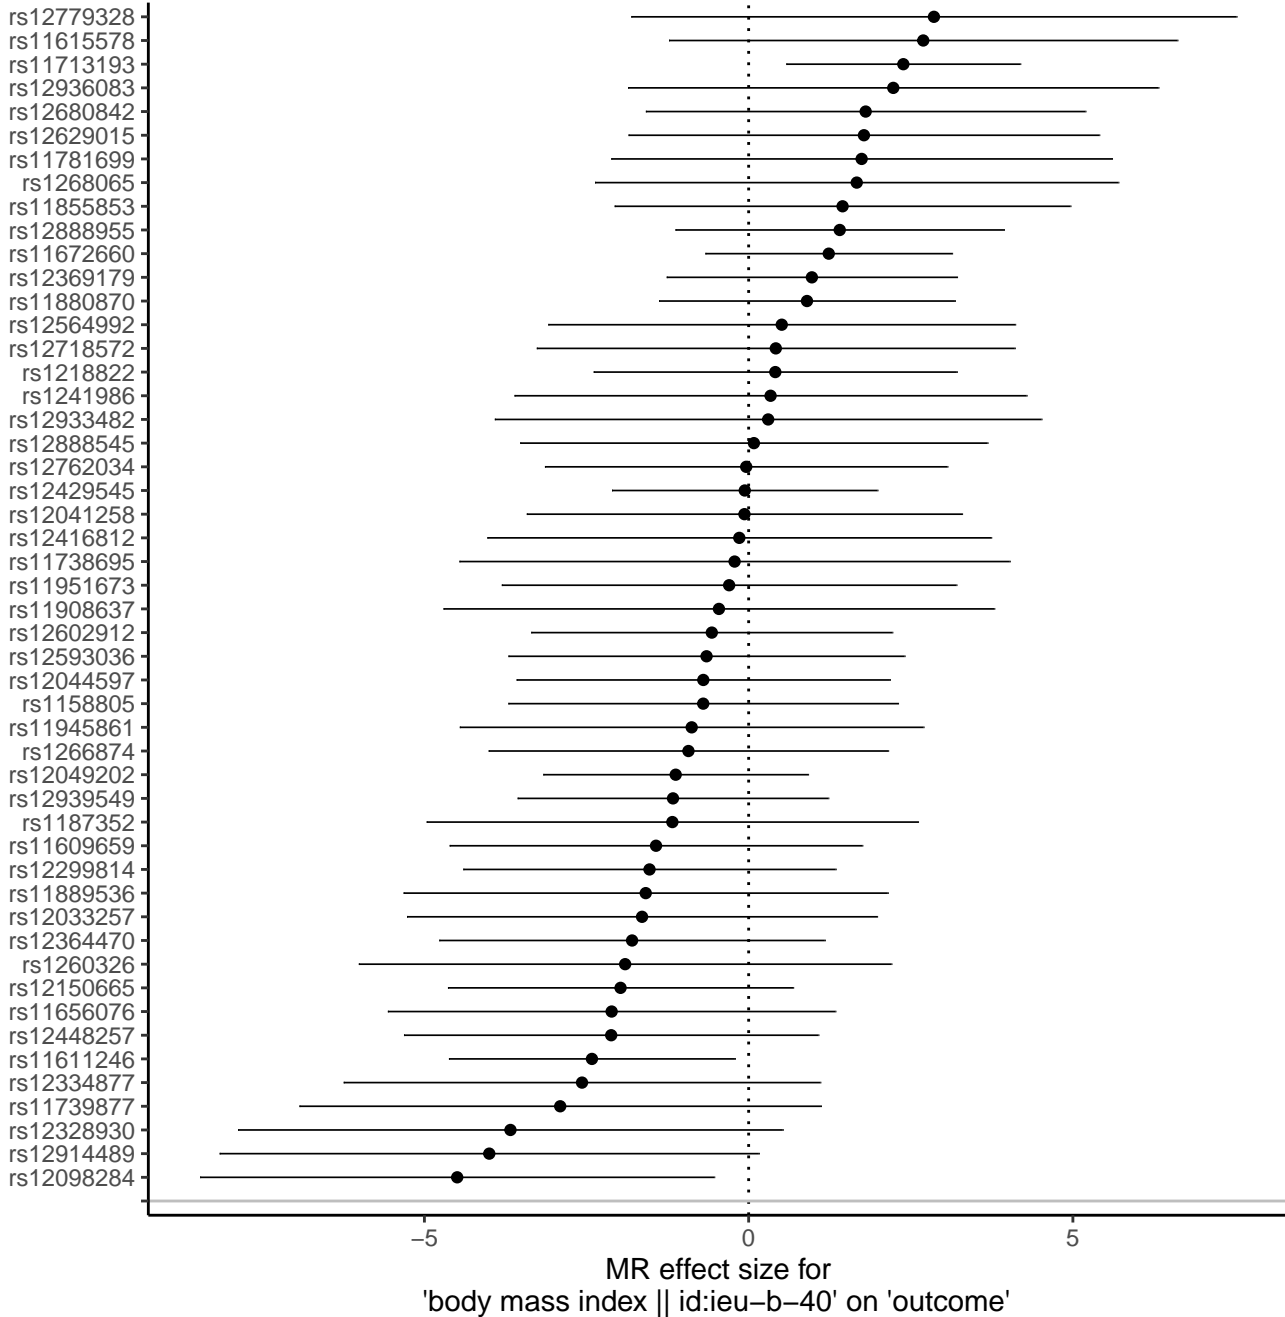

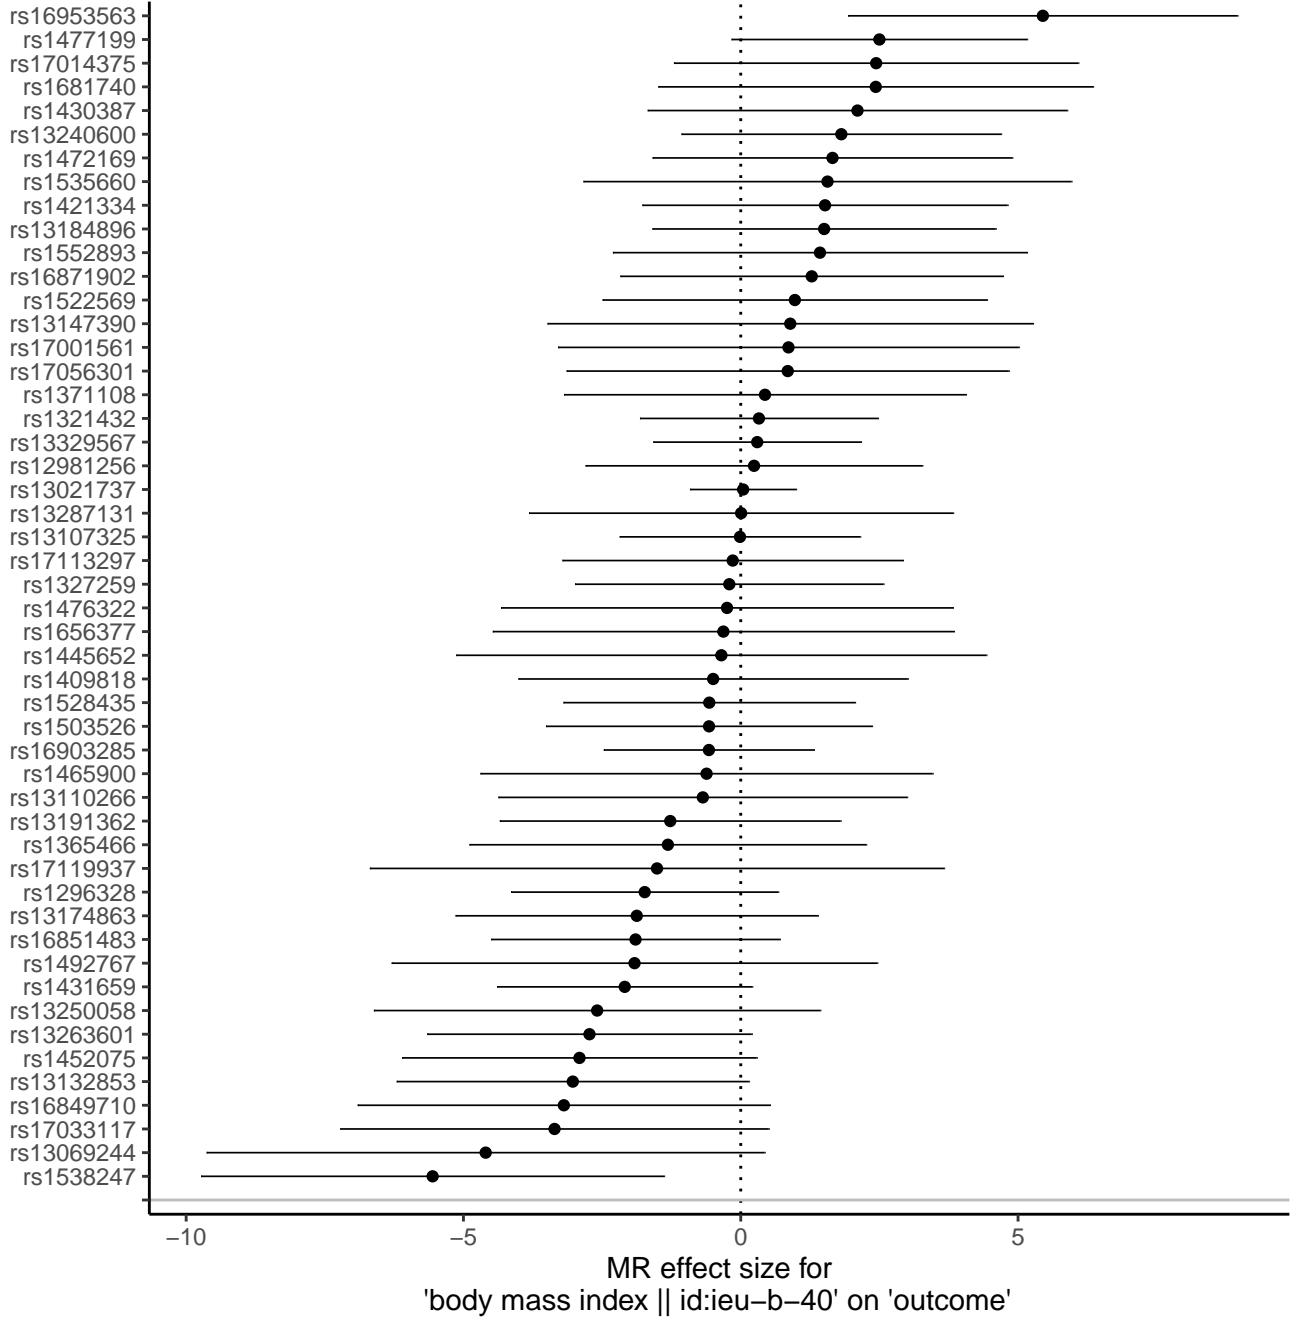

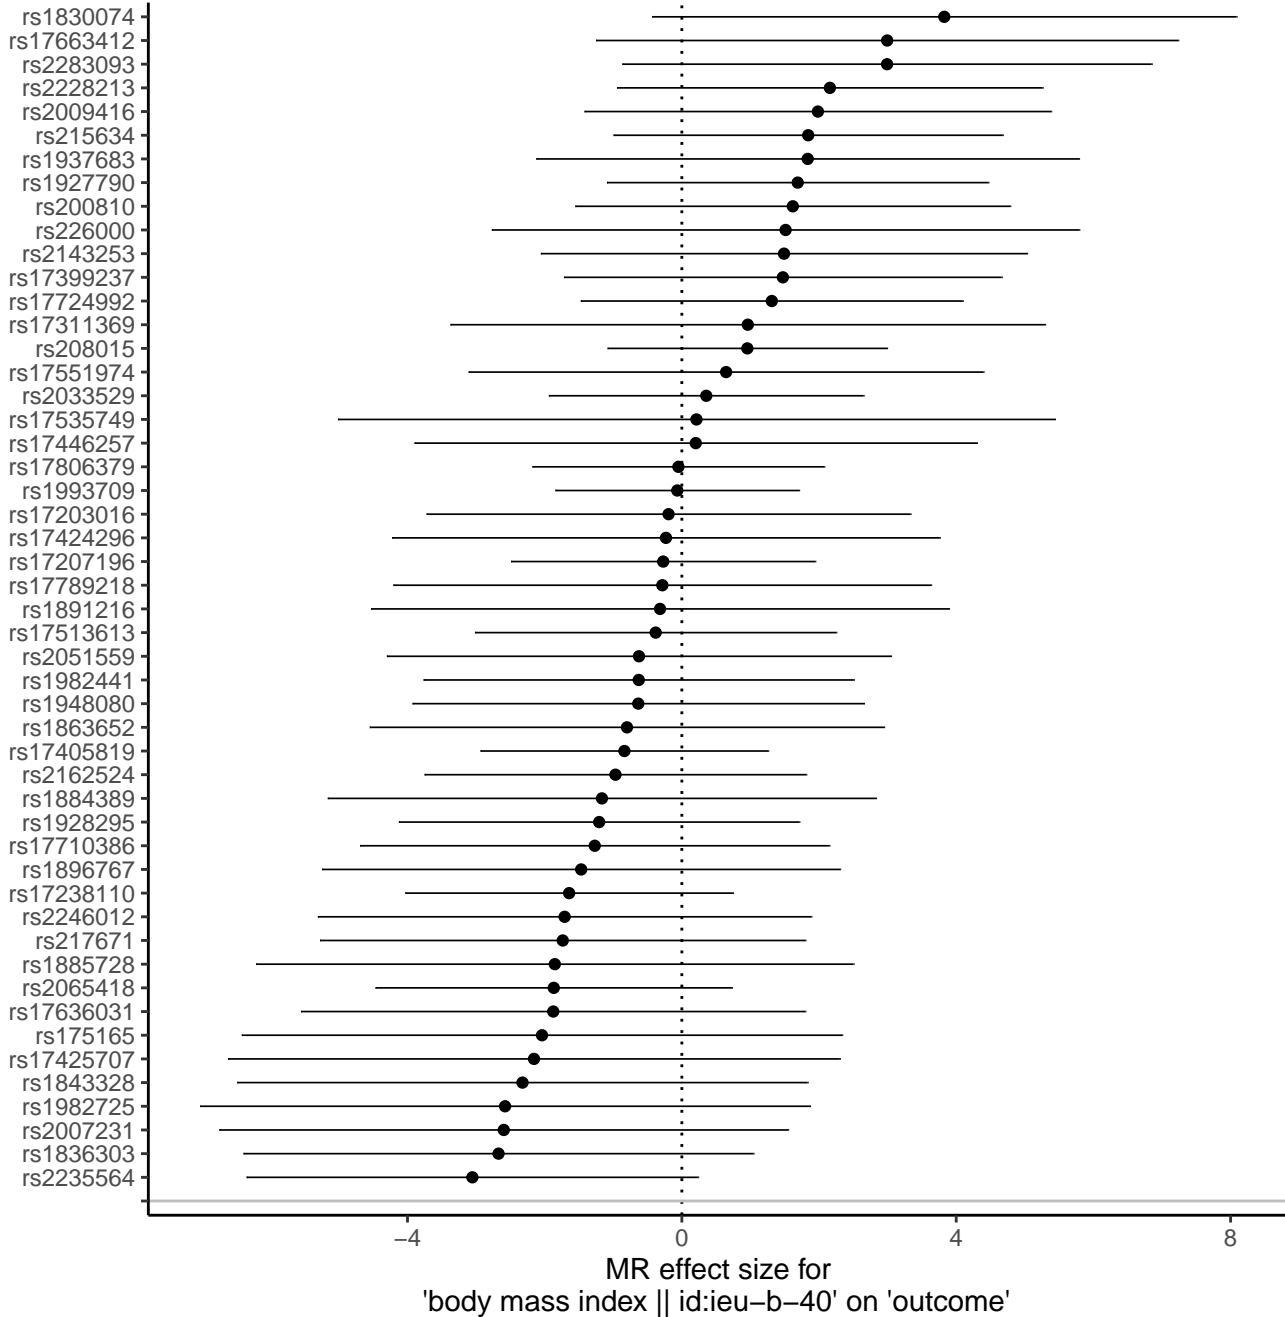

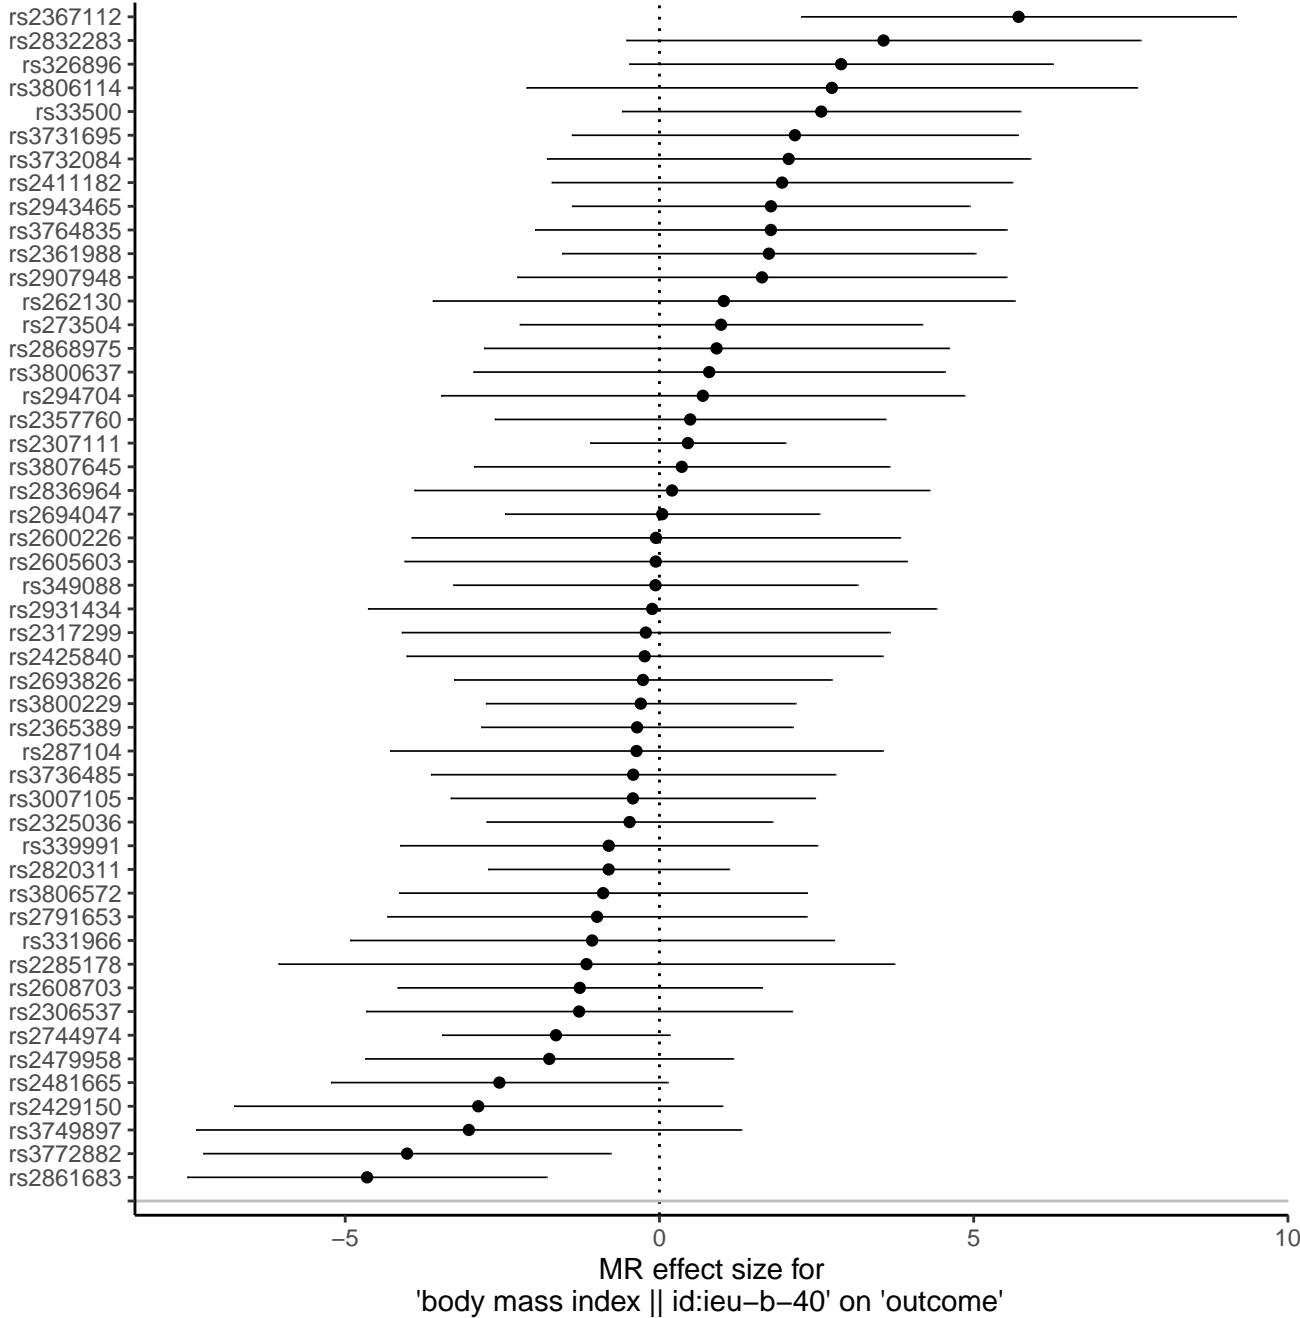

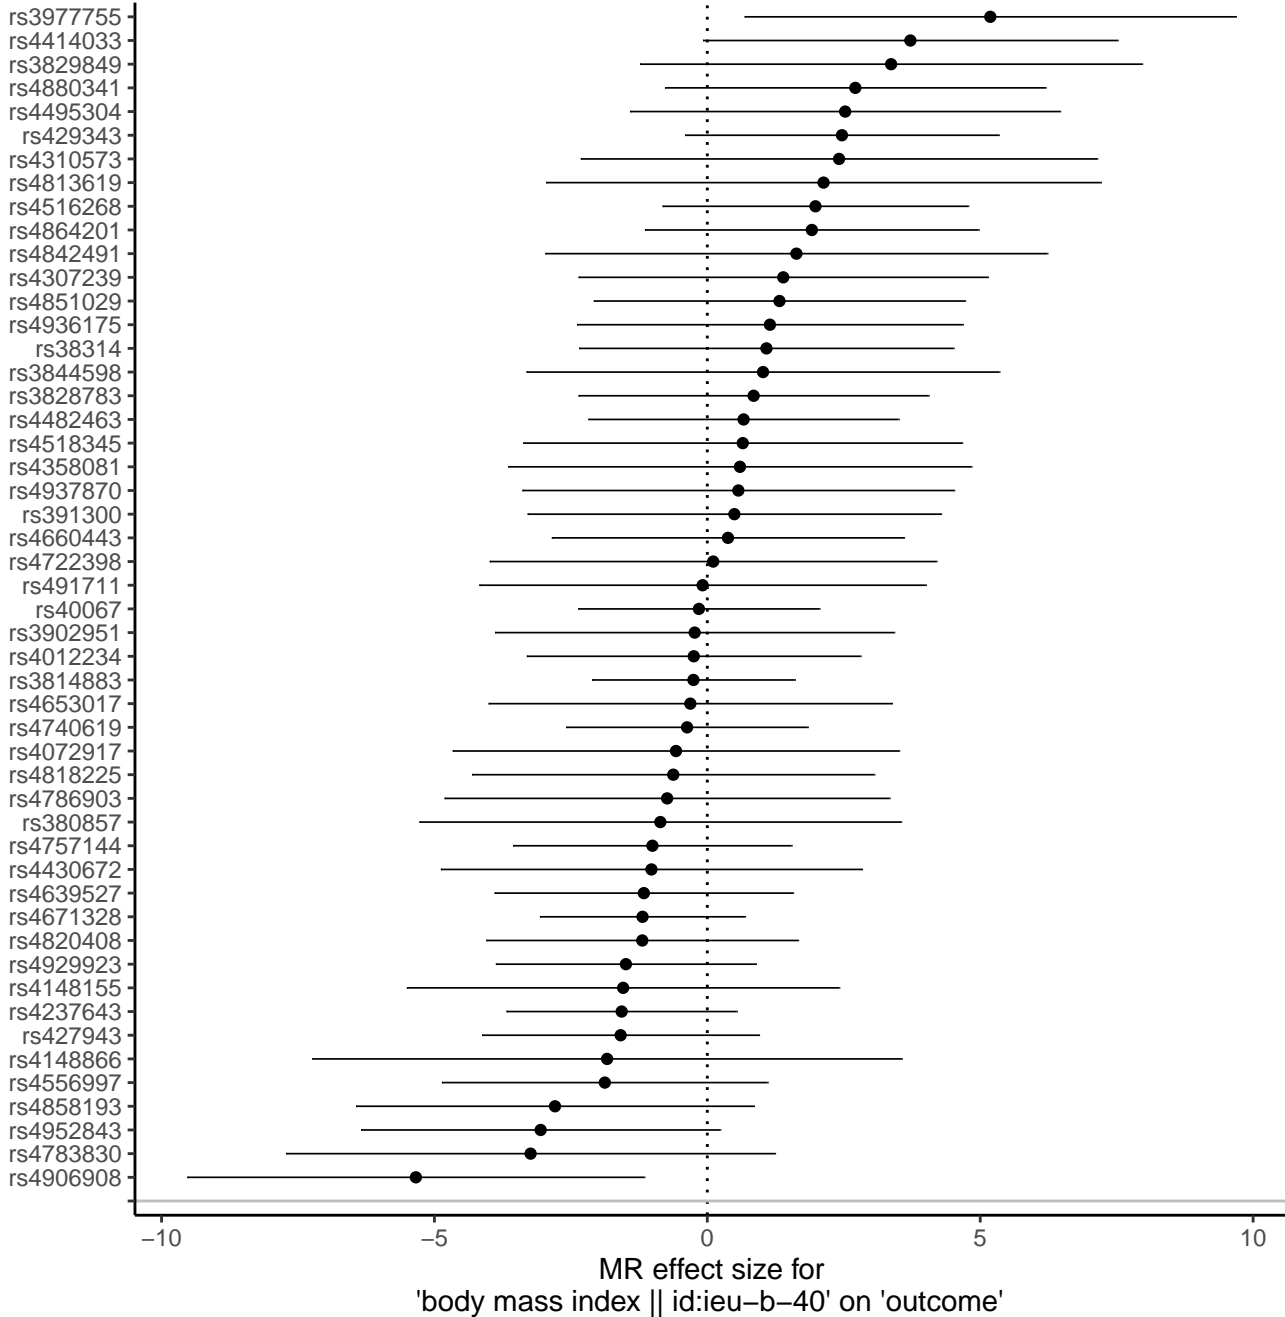



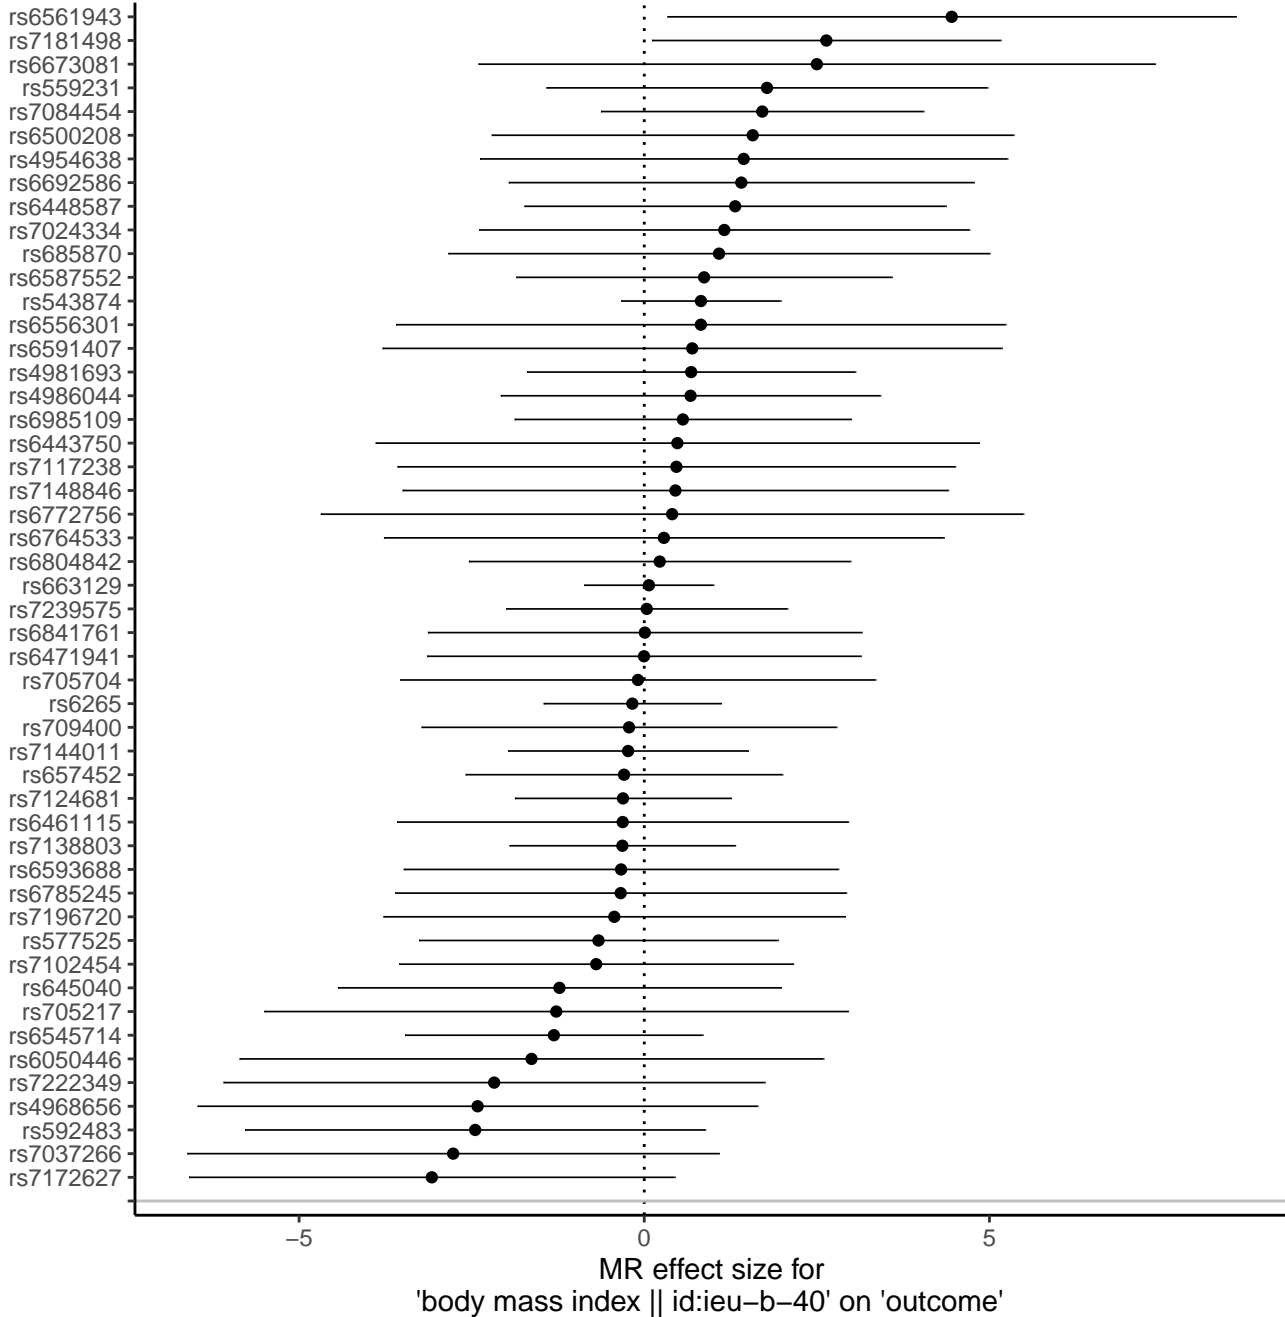

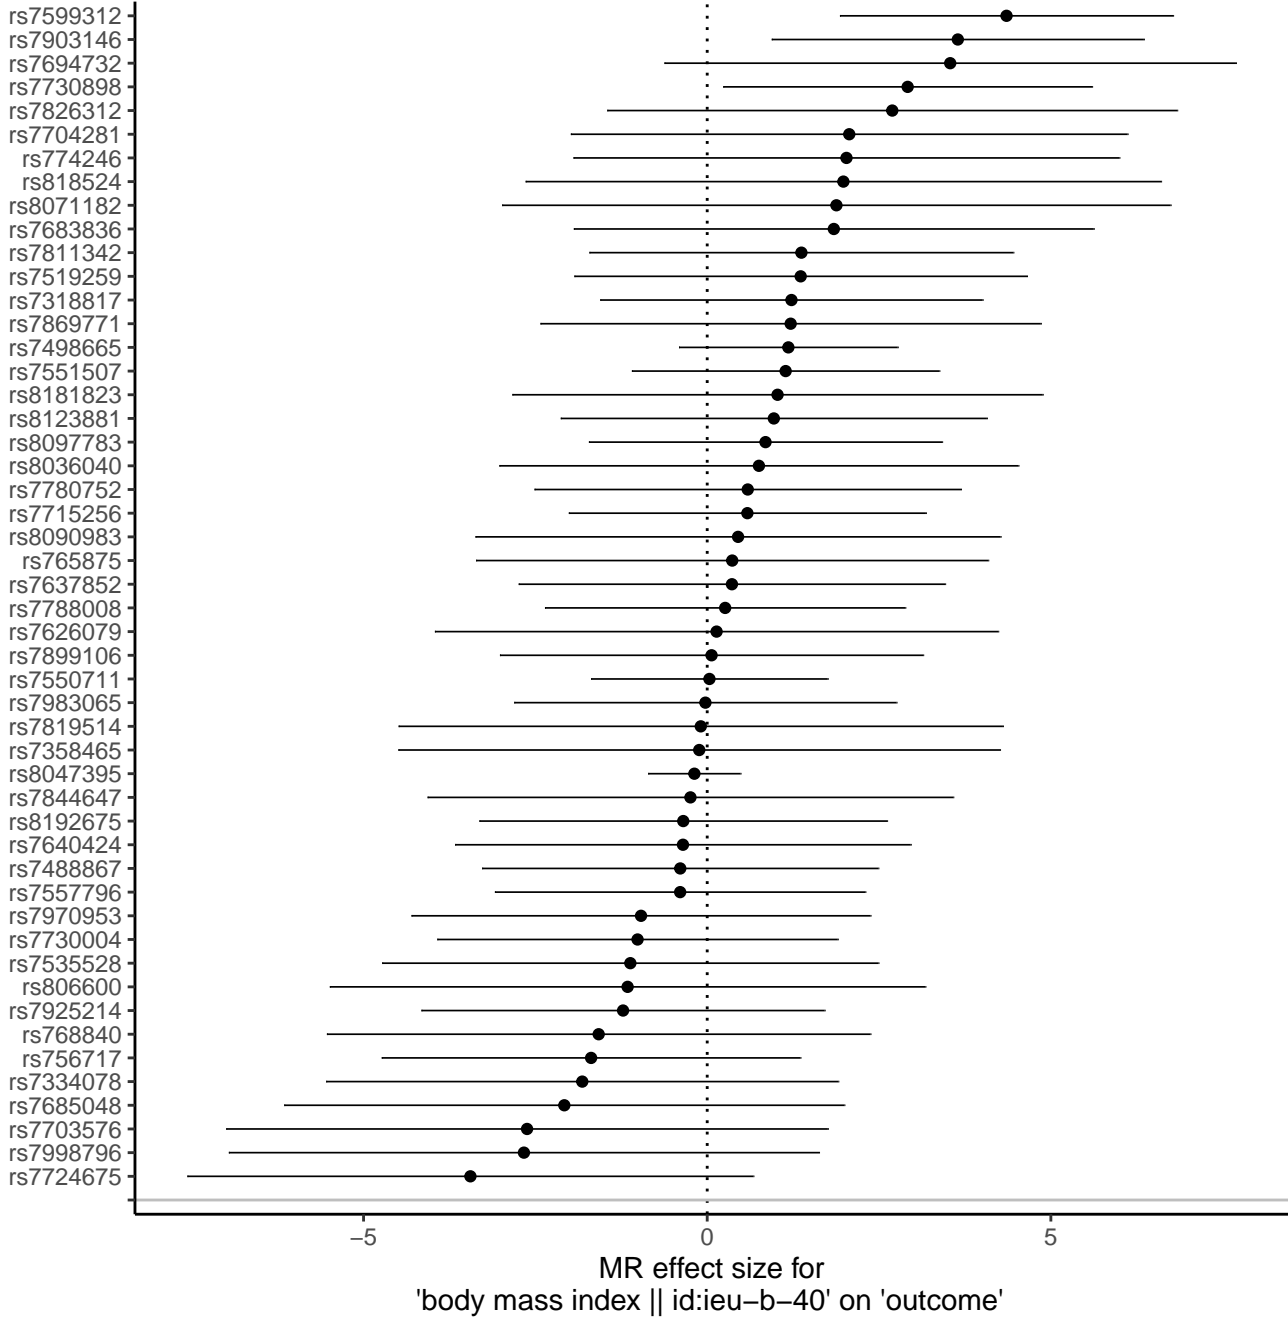

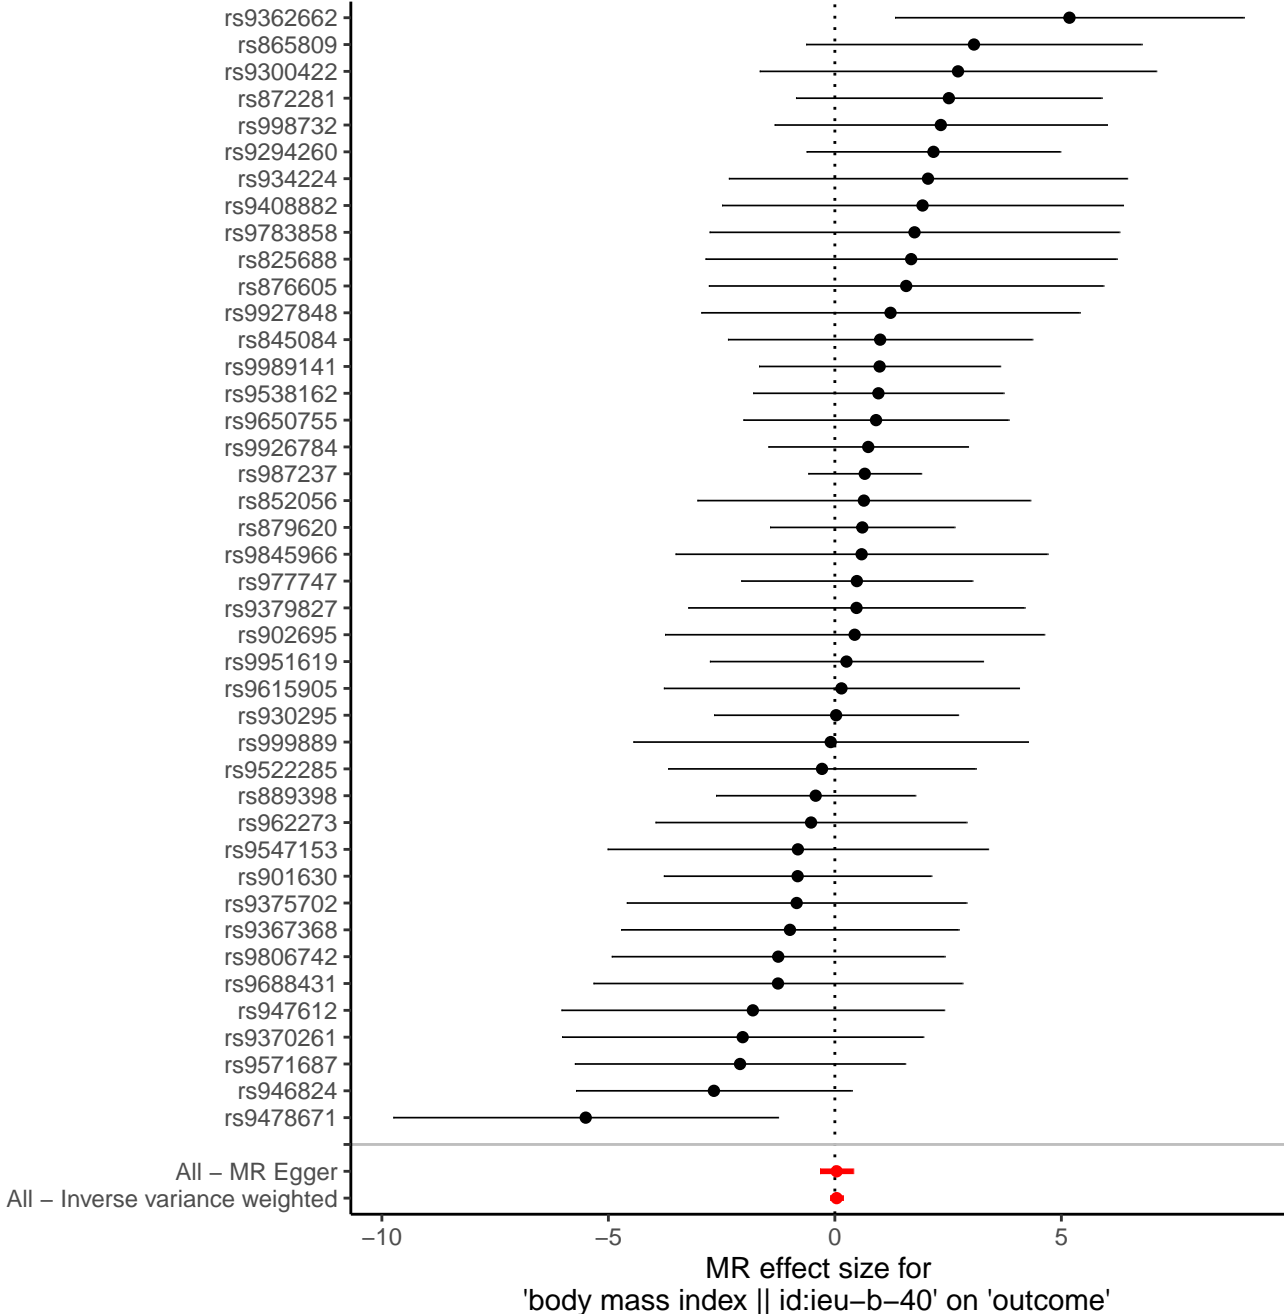

MR Test

- Inverse variance weighted
- MR Egger
- Simple mode
- Weighted median
- Weighted mode

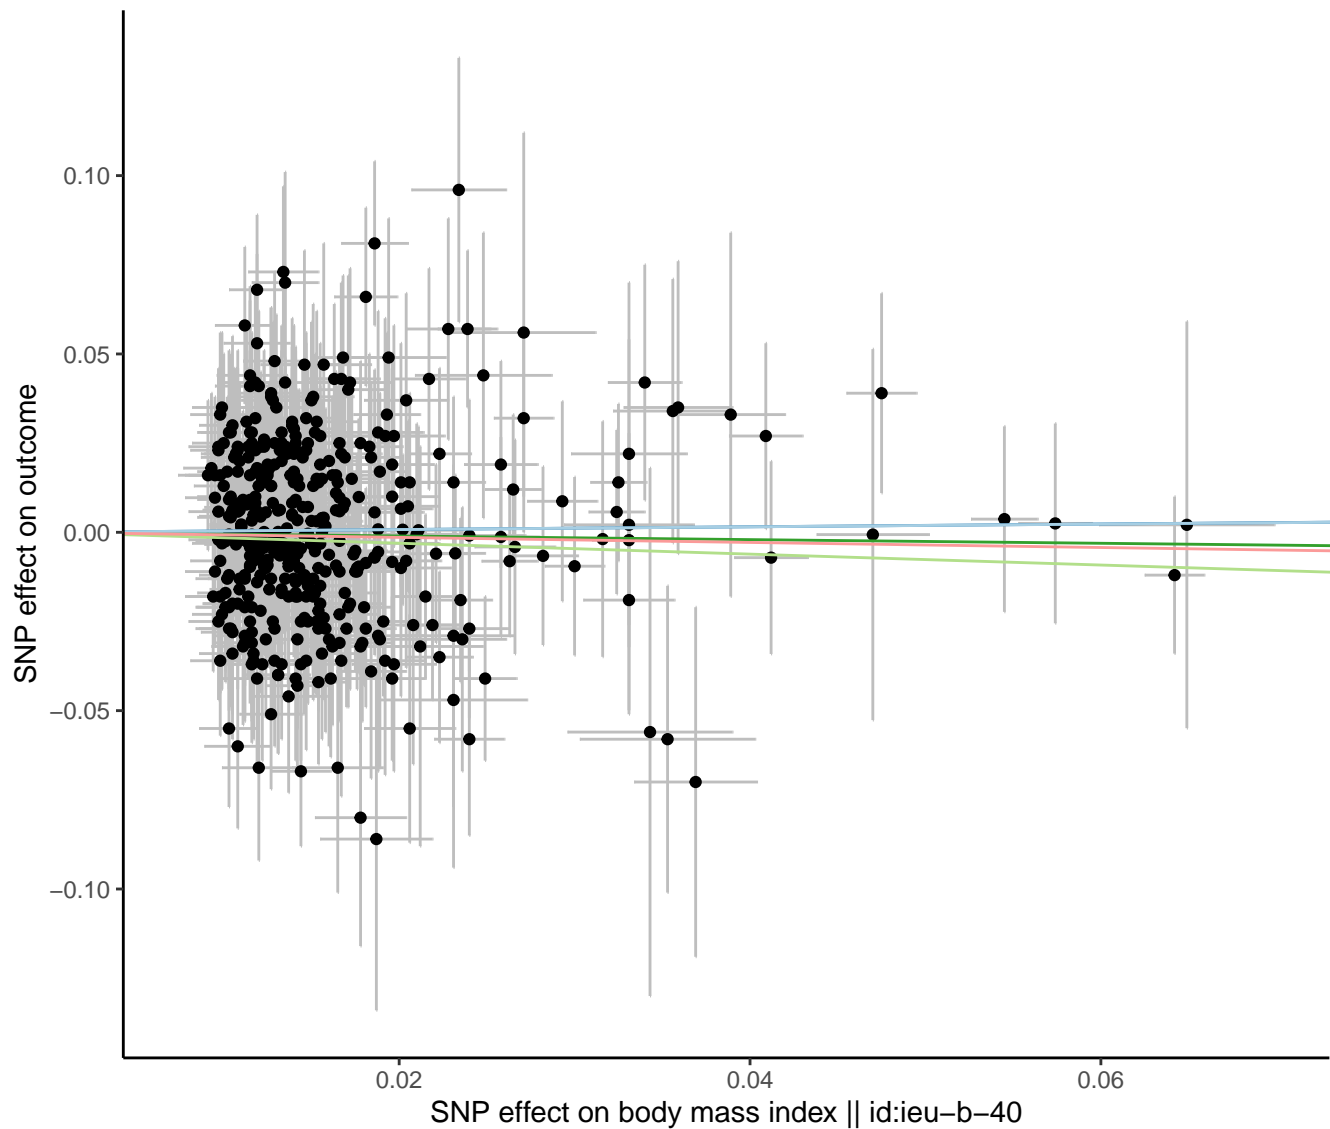

MR Method

Inverse variance weighted

MR Egger

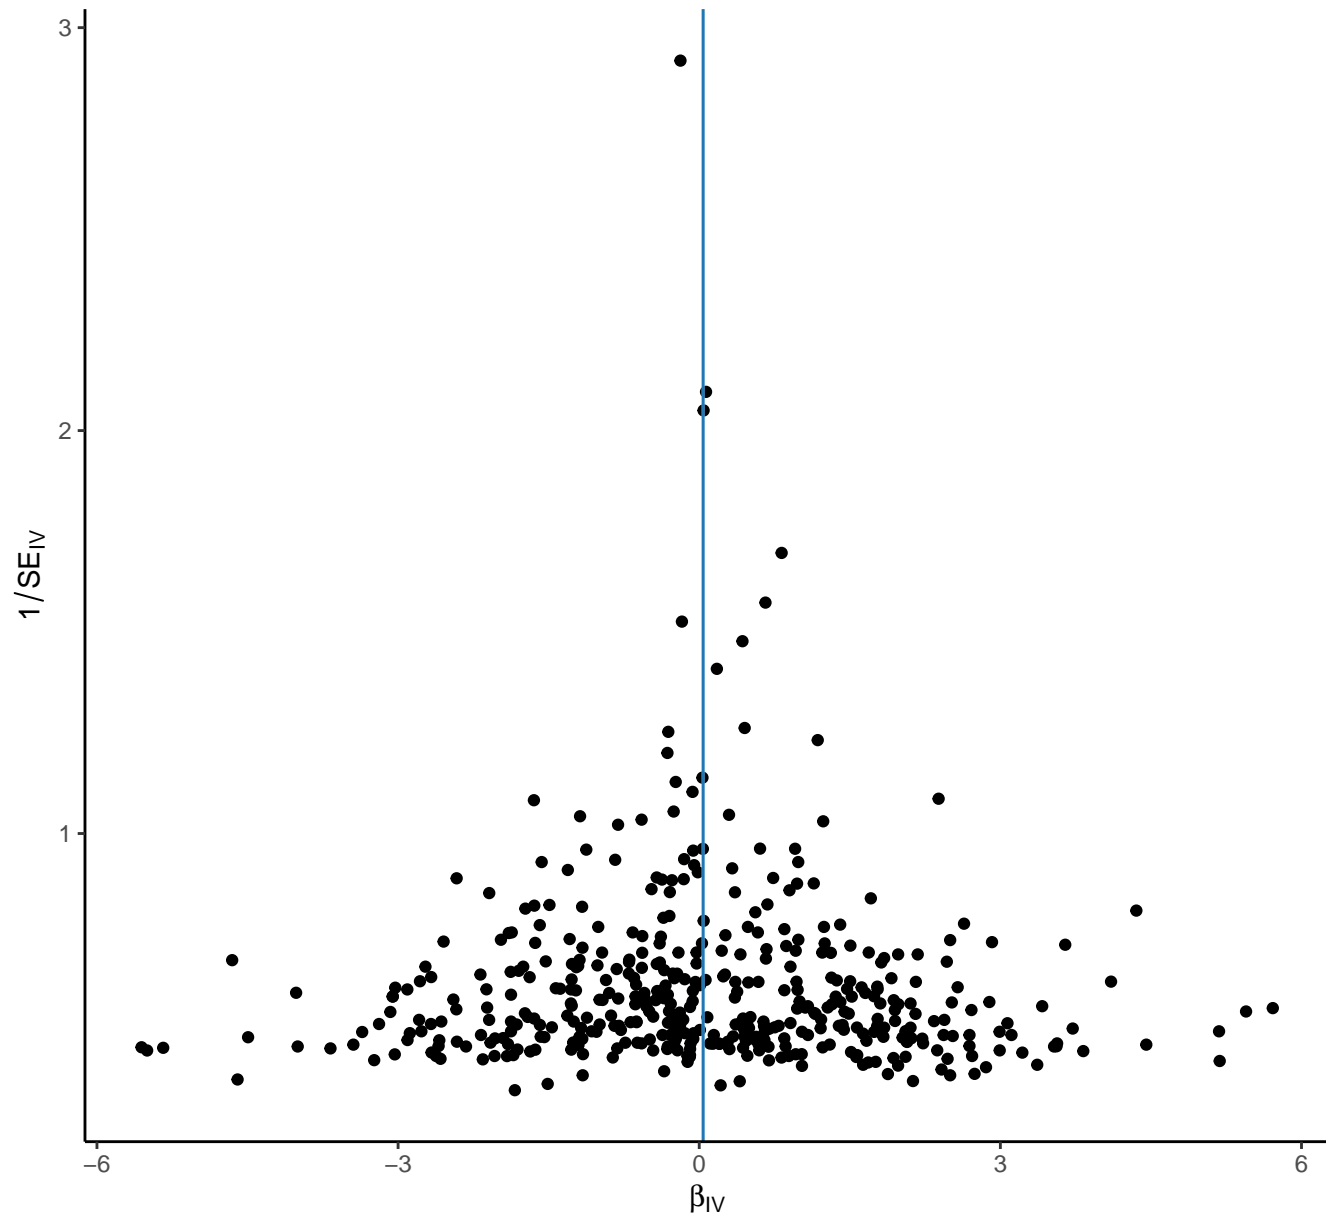

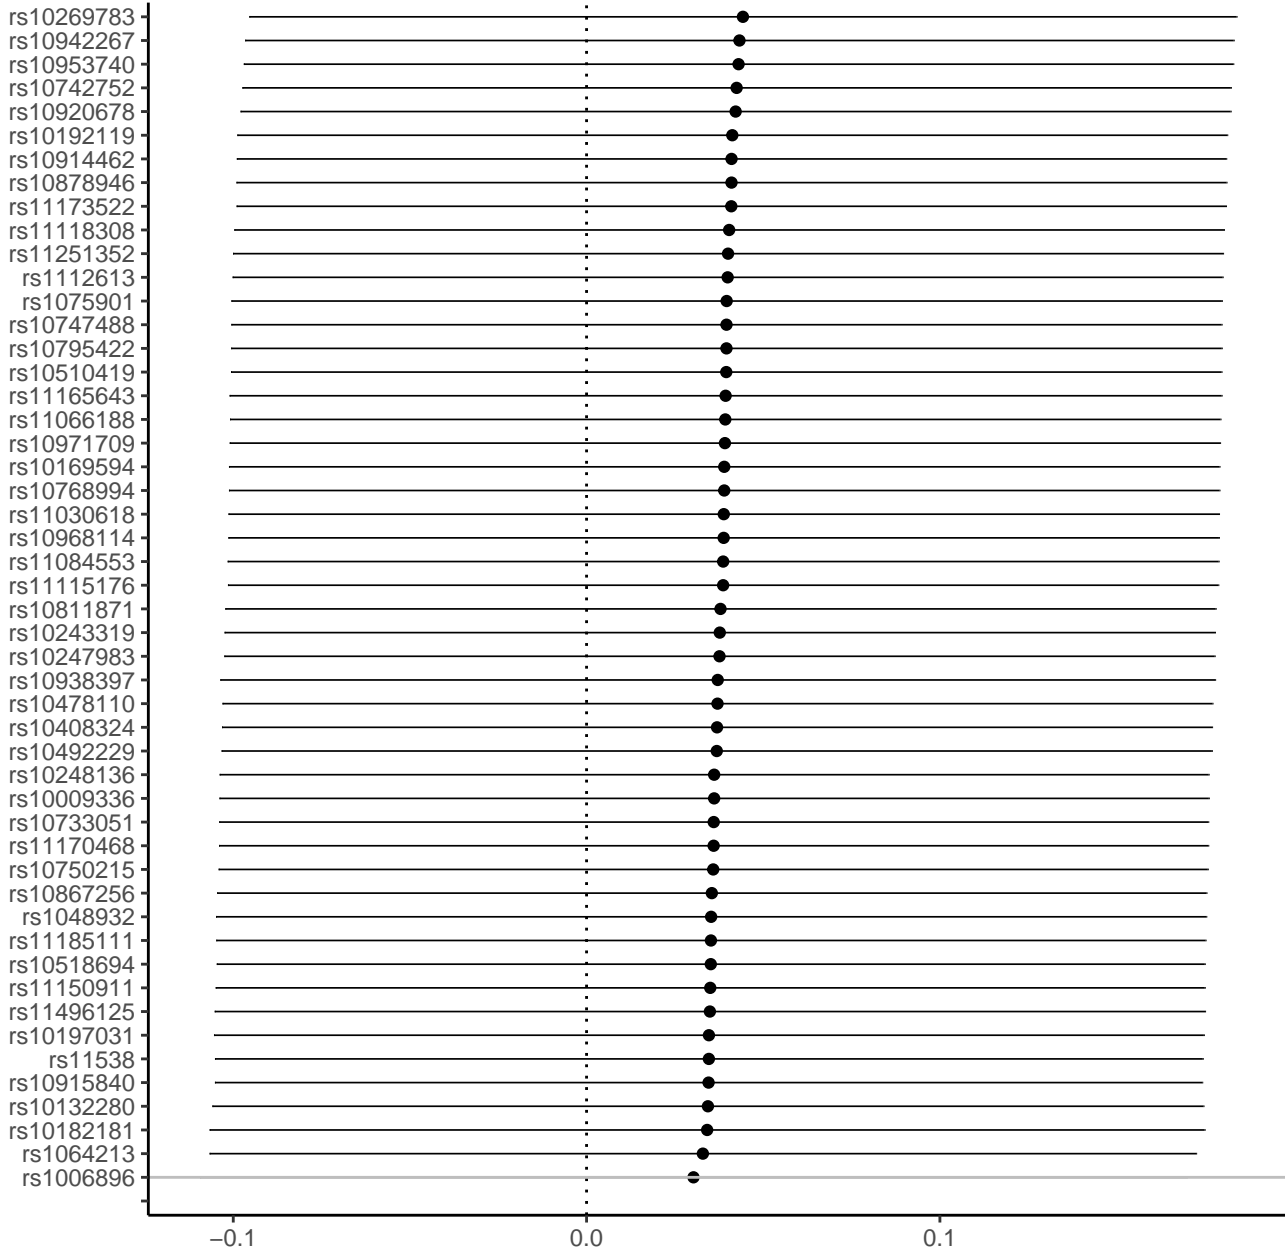

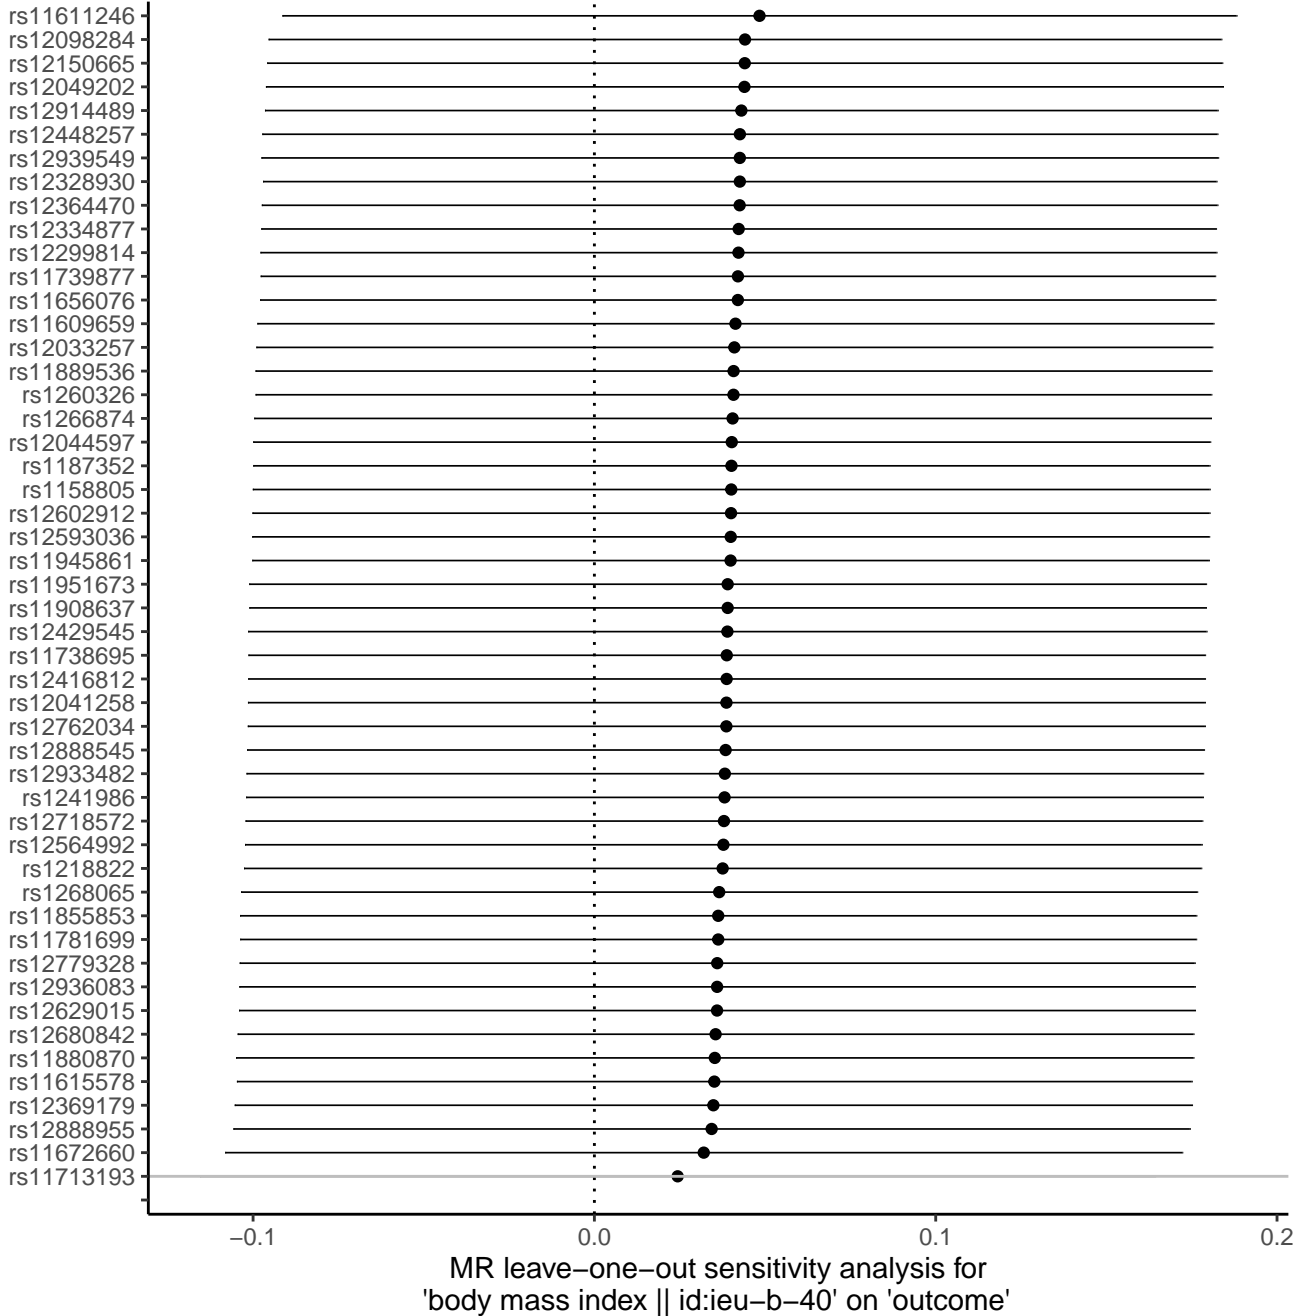

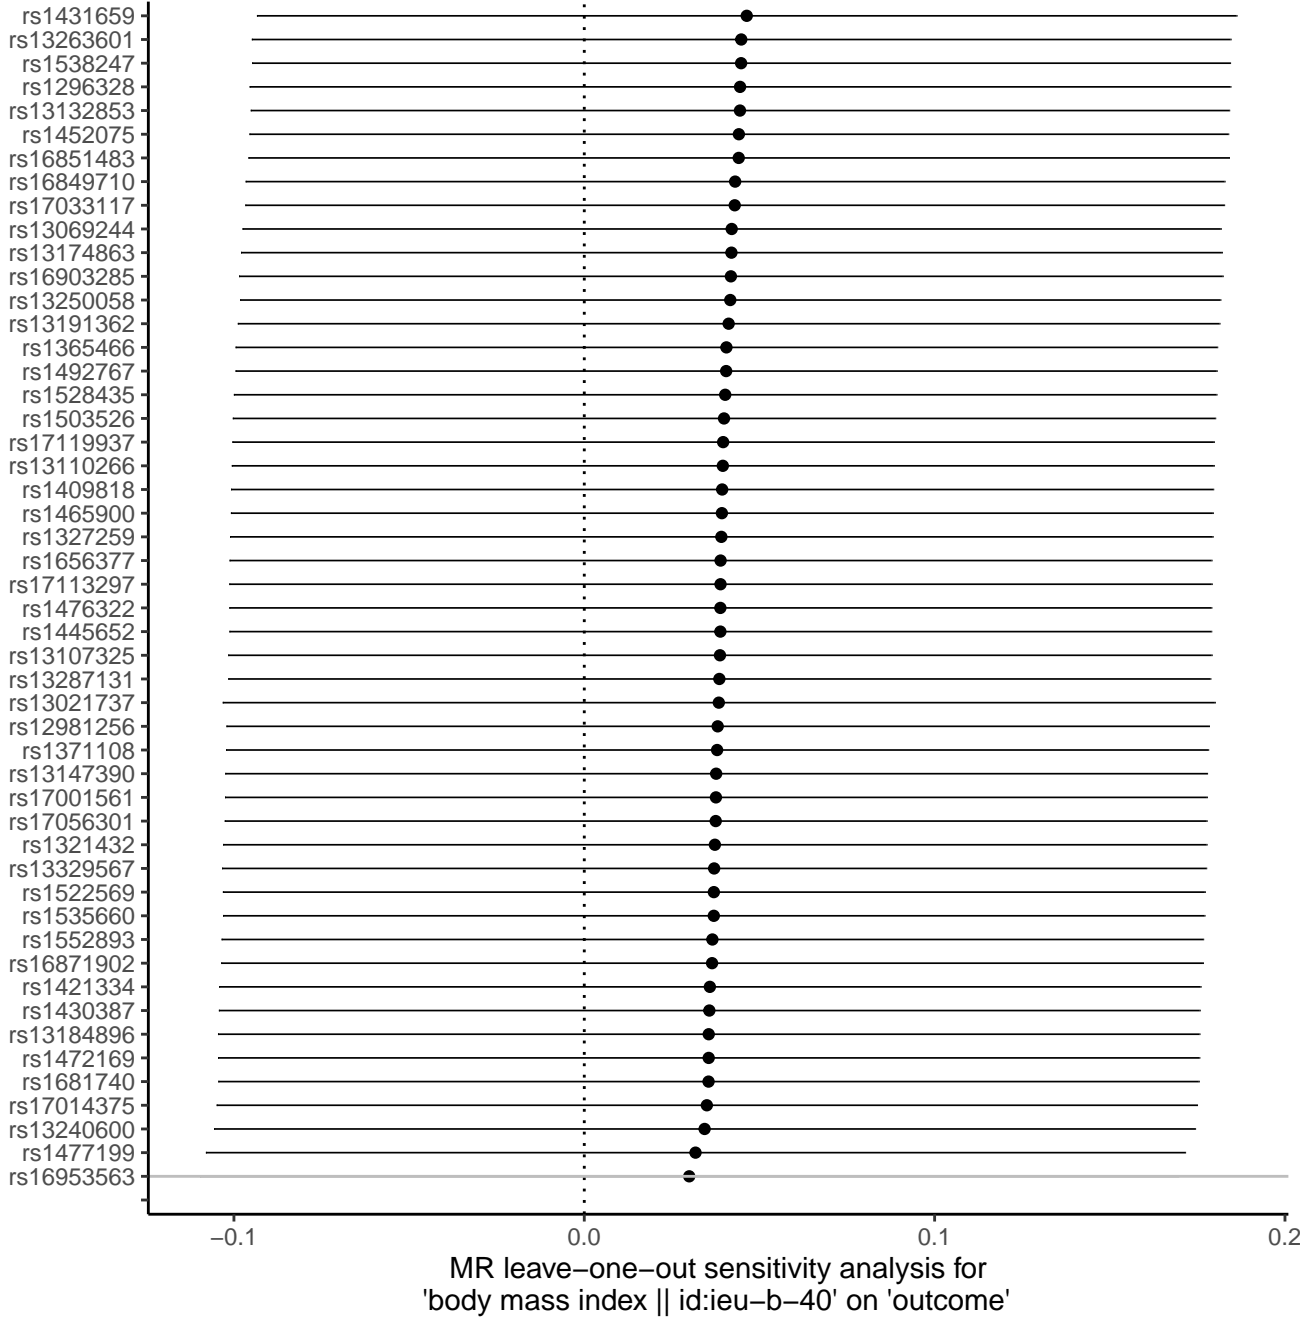



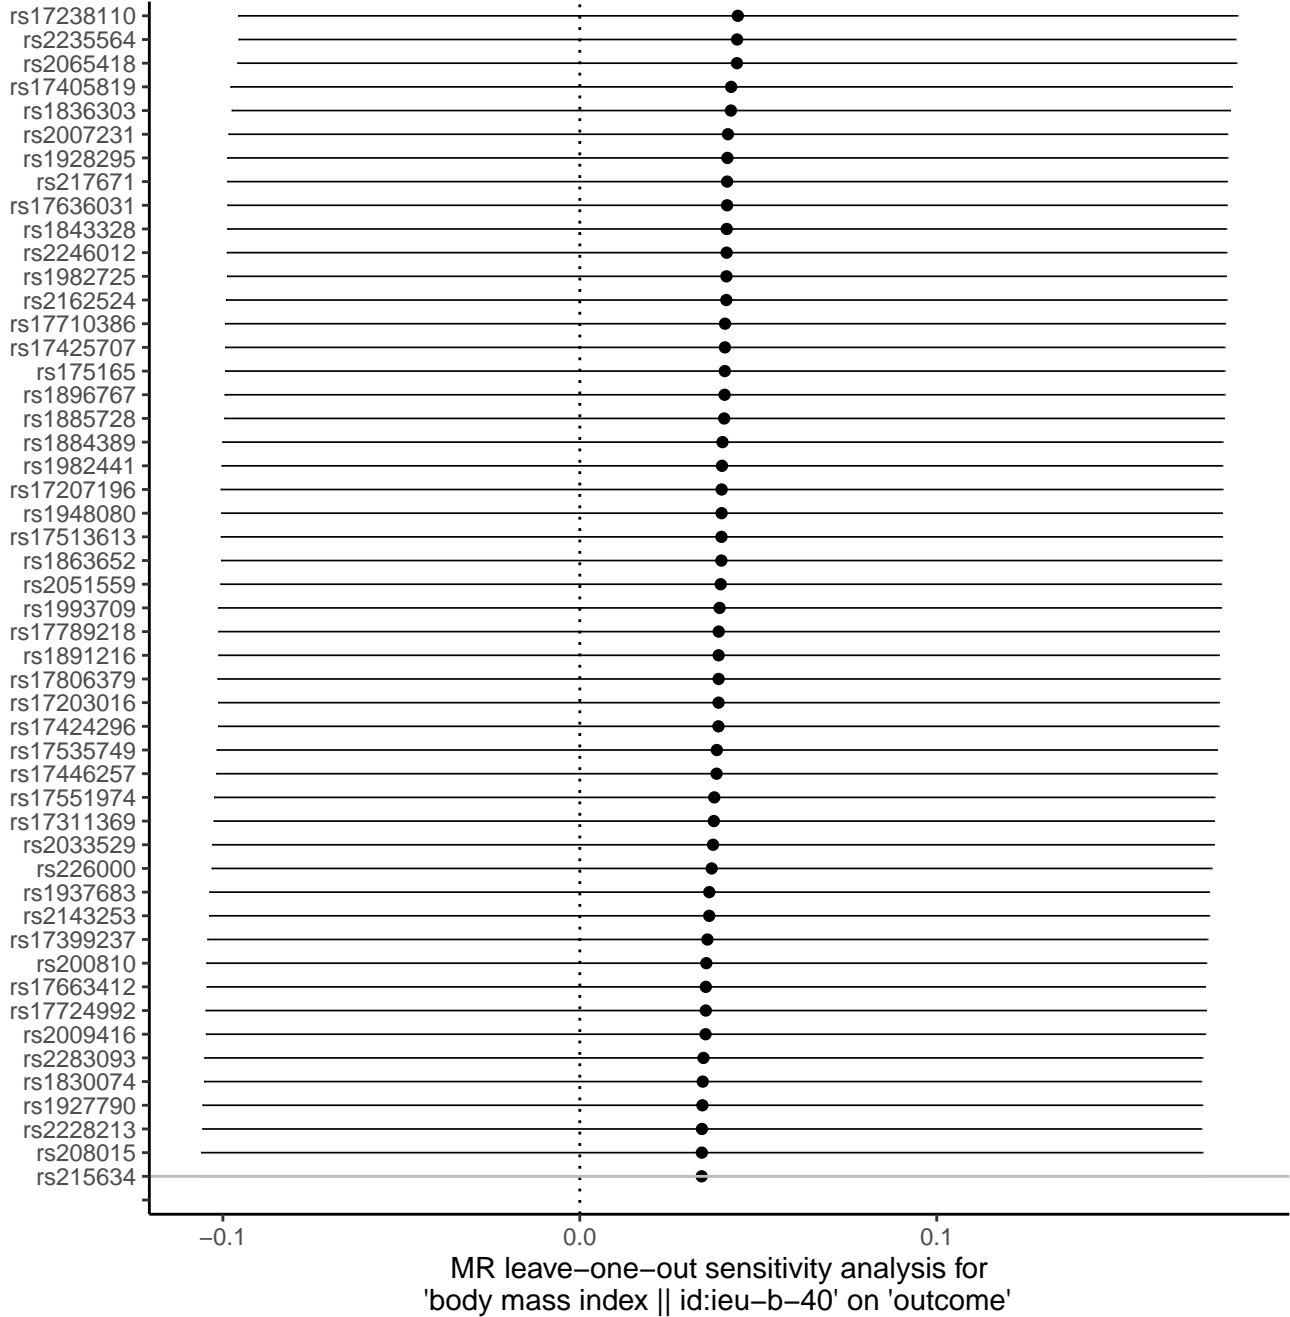

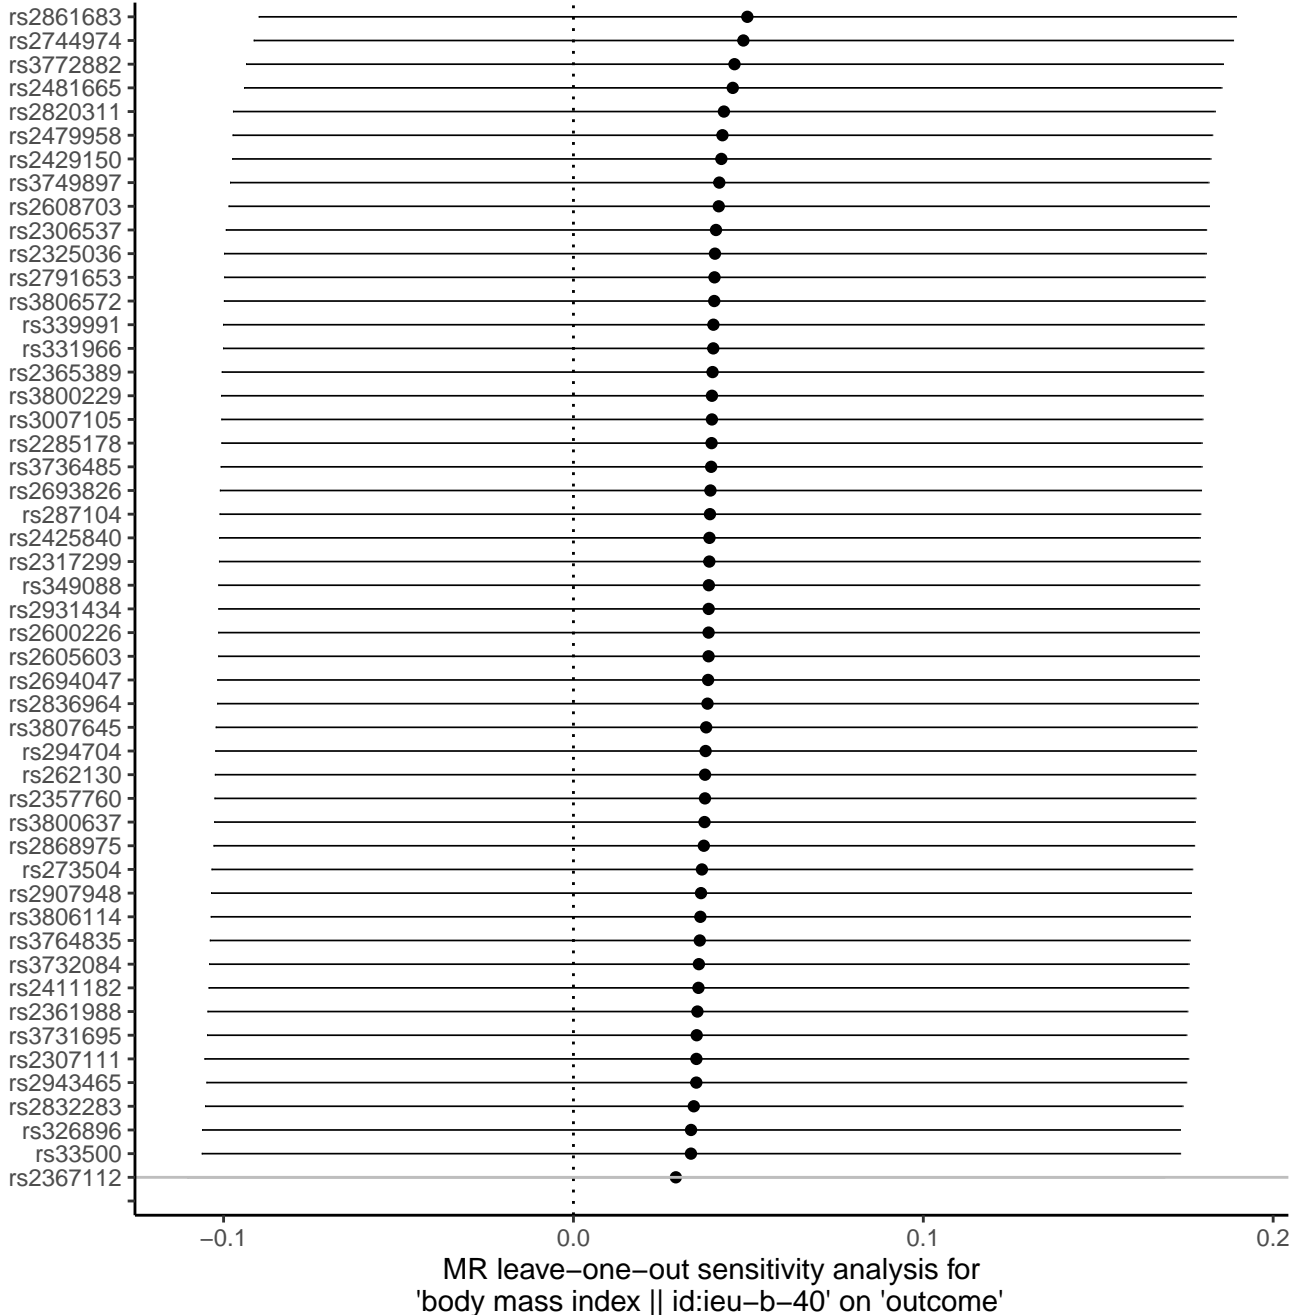

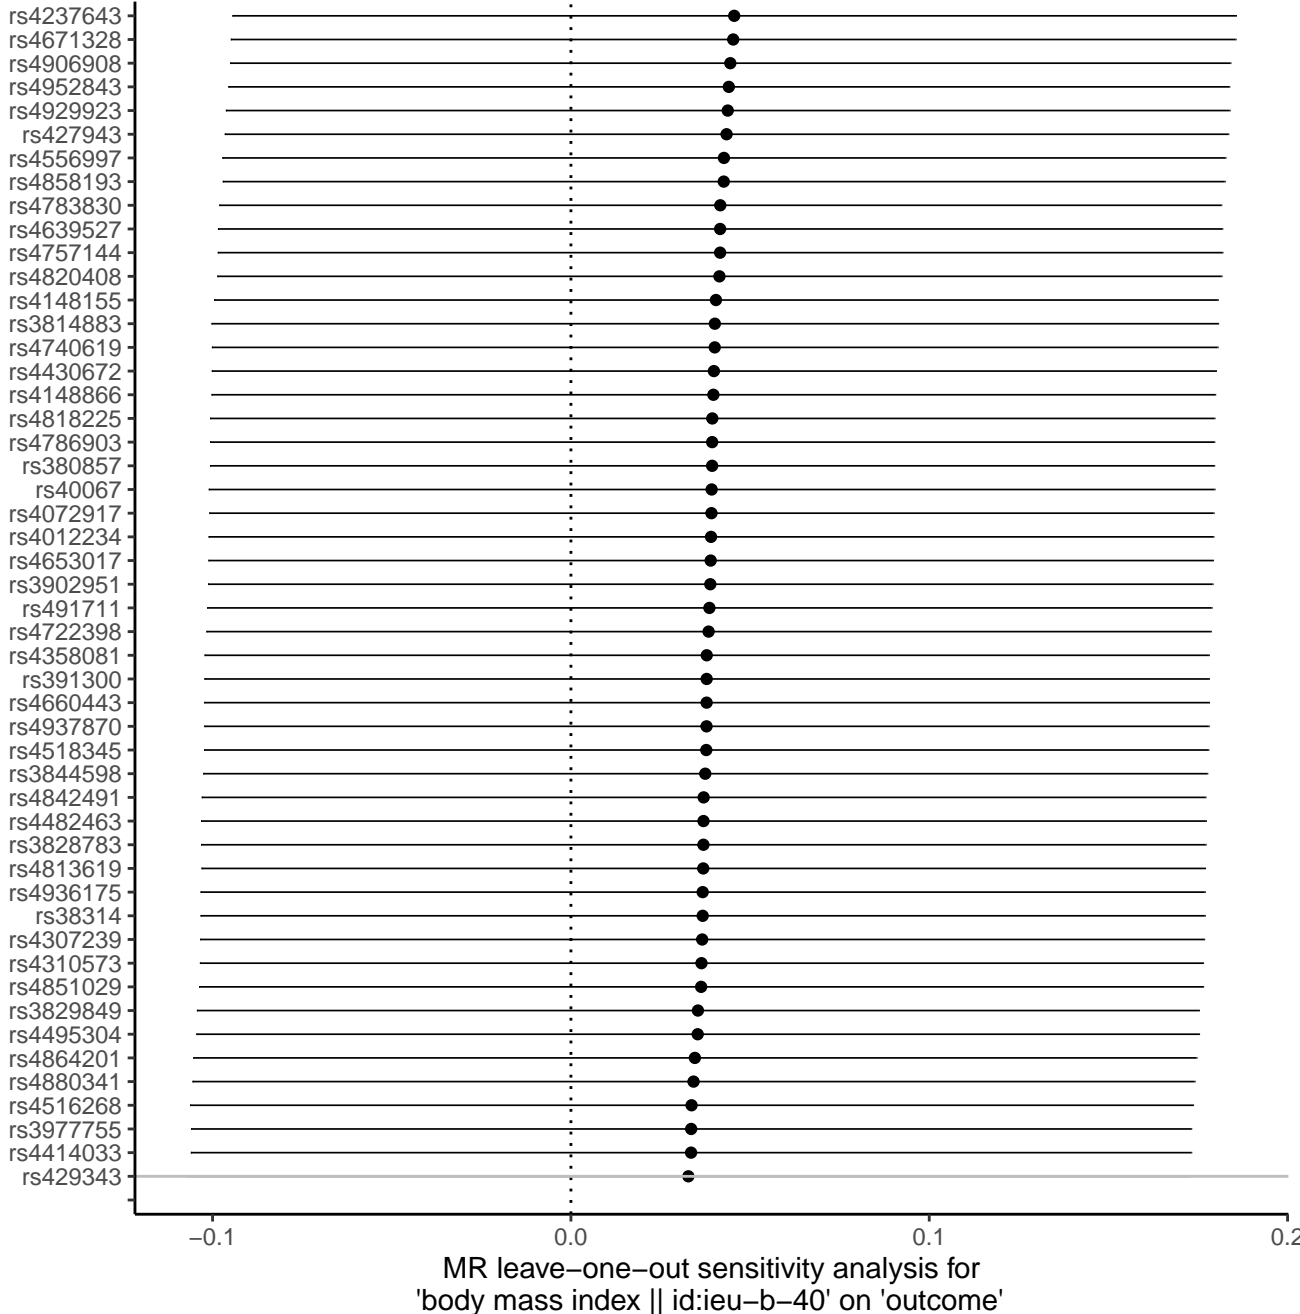

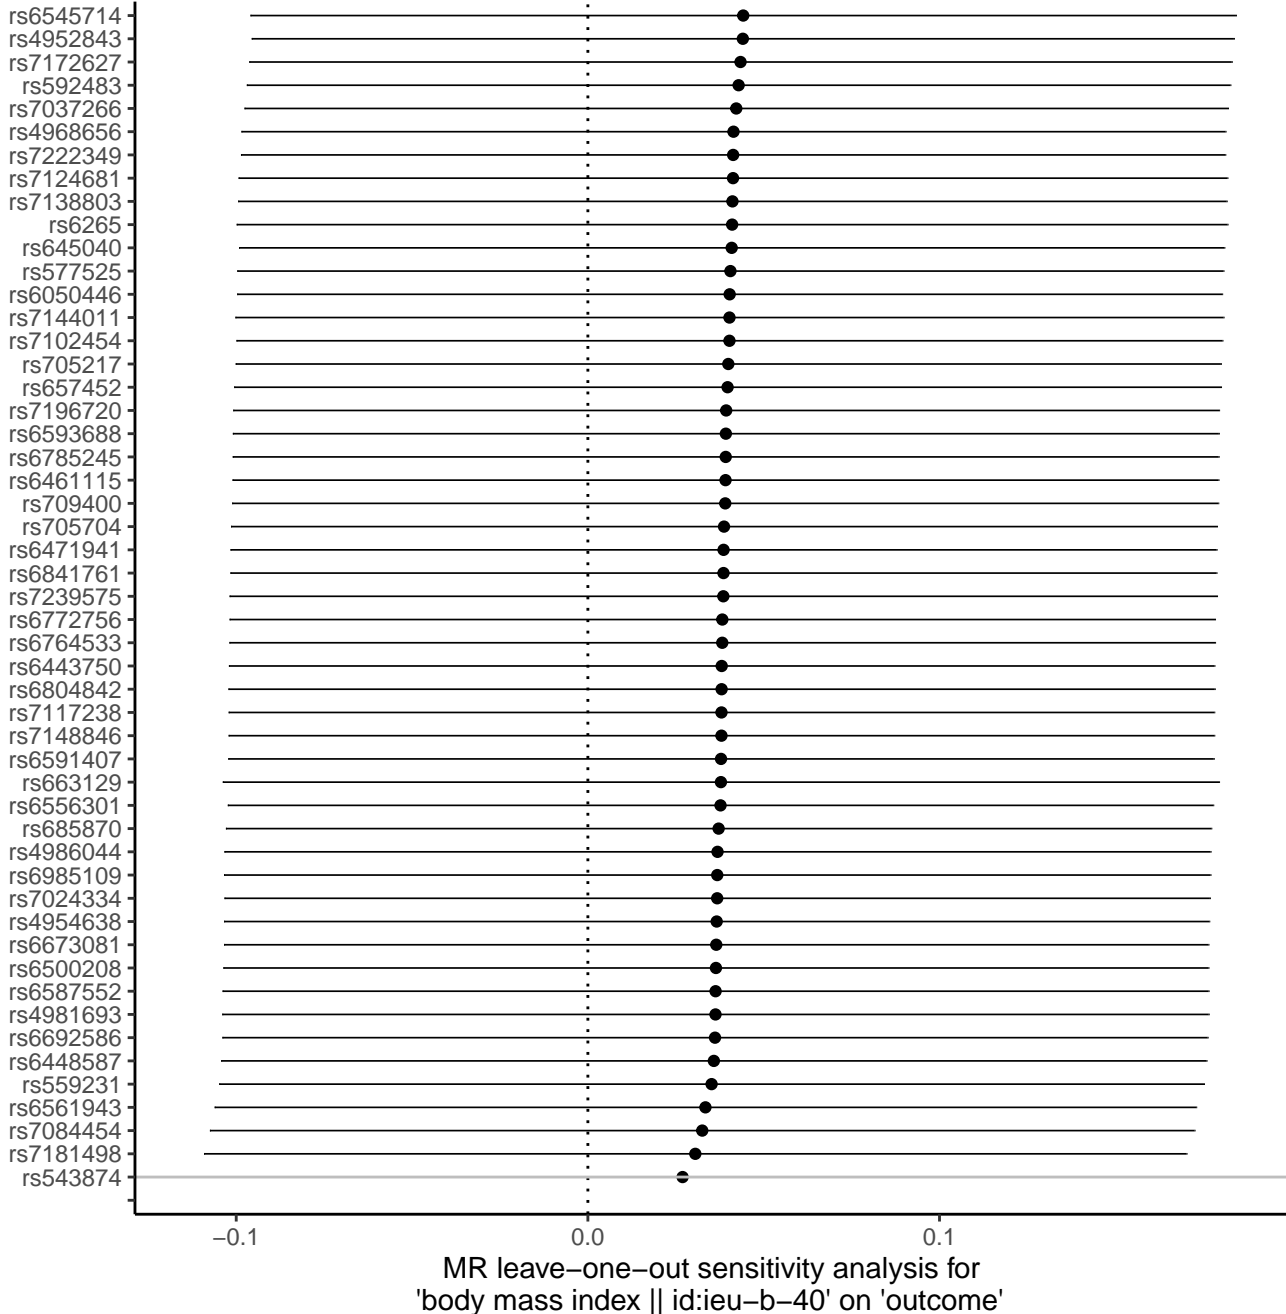

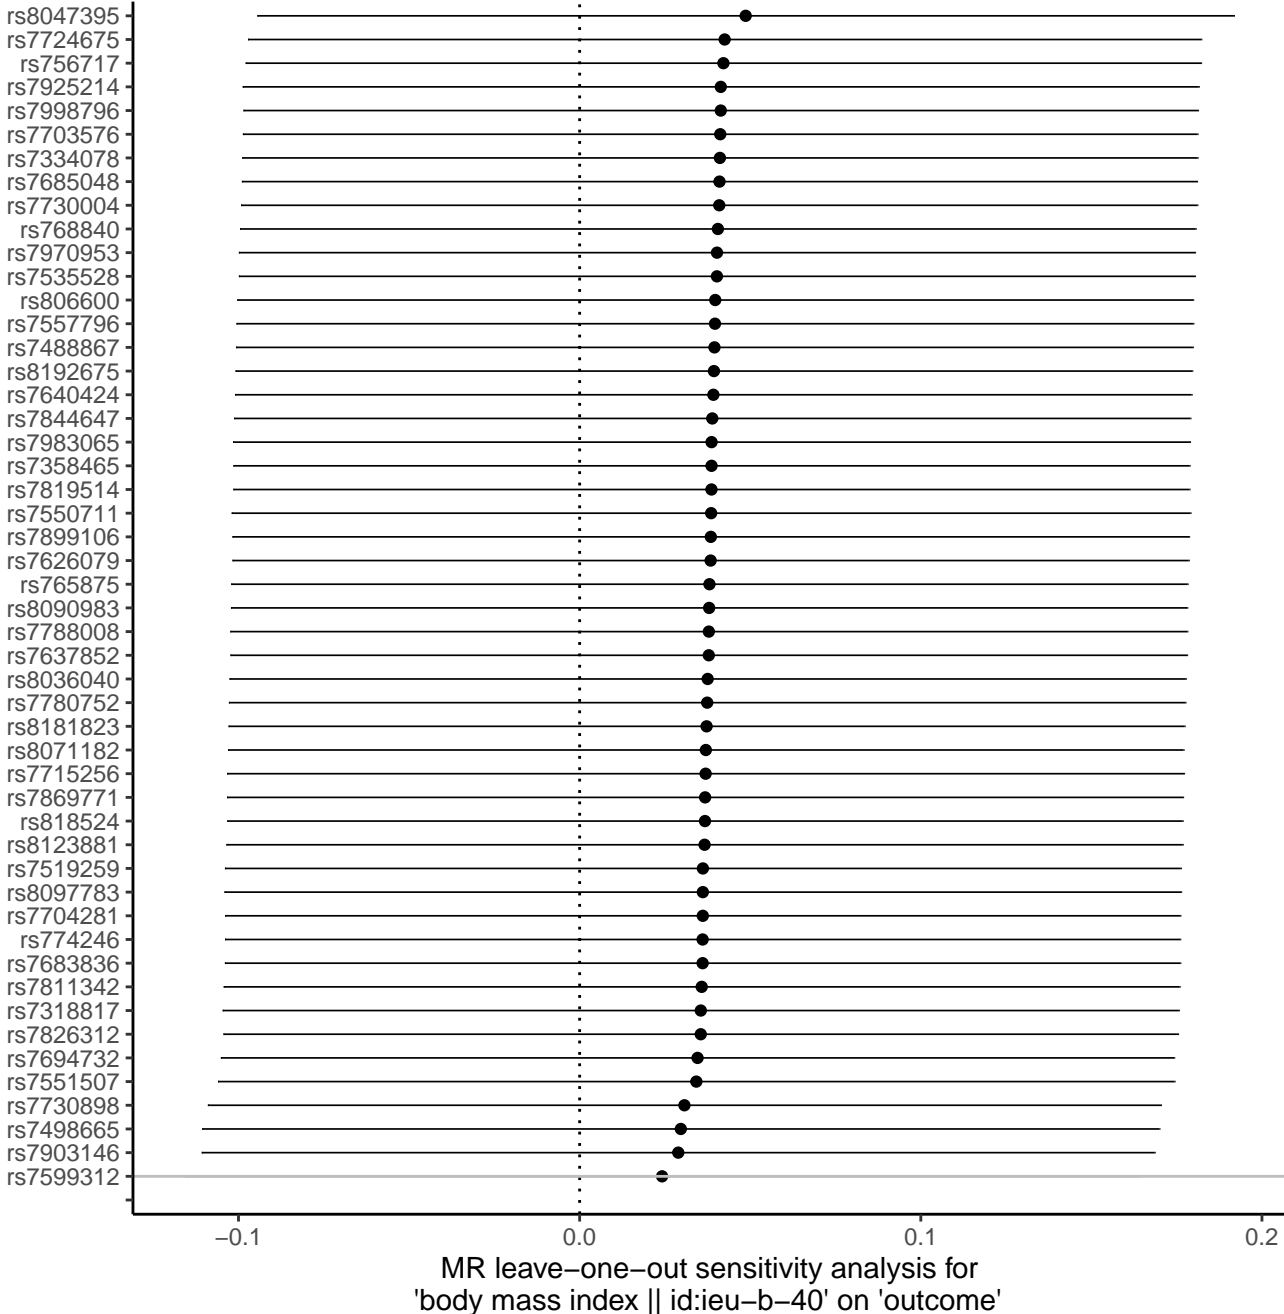

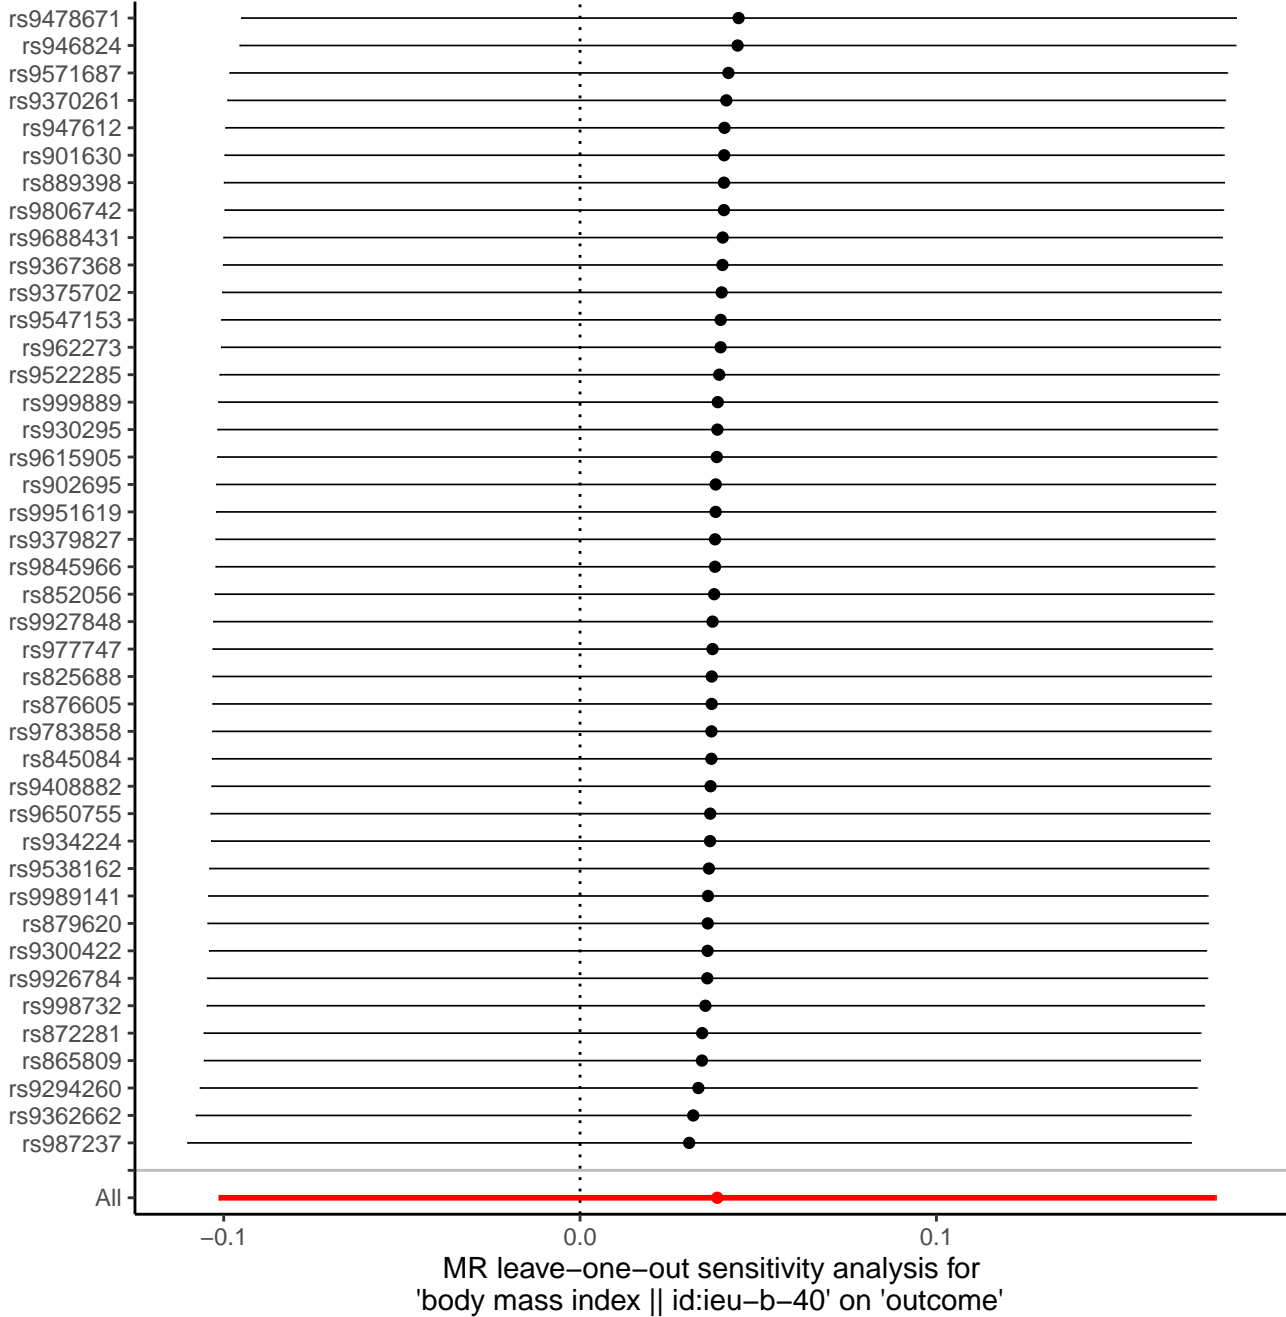

**Exposure: Coronary Artery Disease, Outcome: Corrected Insulin Response adjusted for ISI**  
**Figures of Forest Plot, Comparison of Different MR Methods, Funnel Plot and Leave-one-out Sensitivity Analysis**

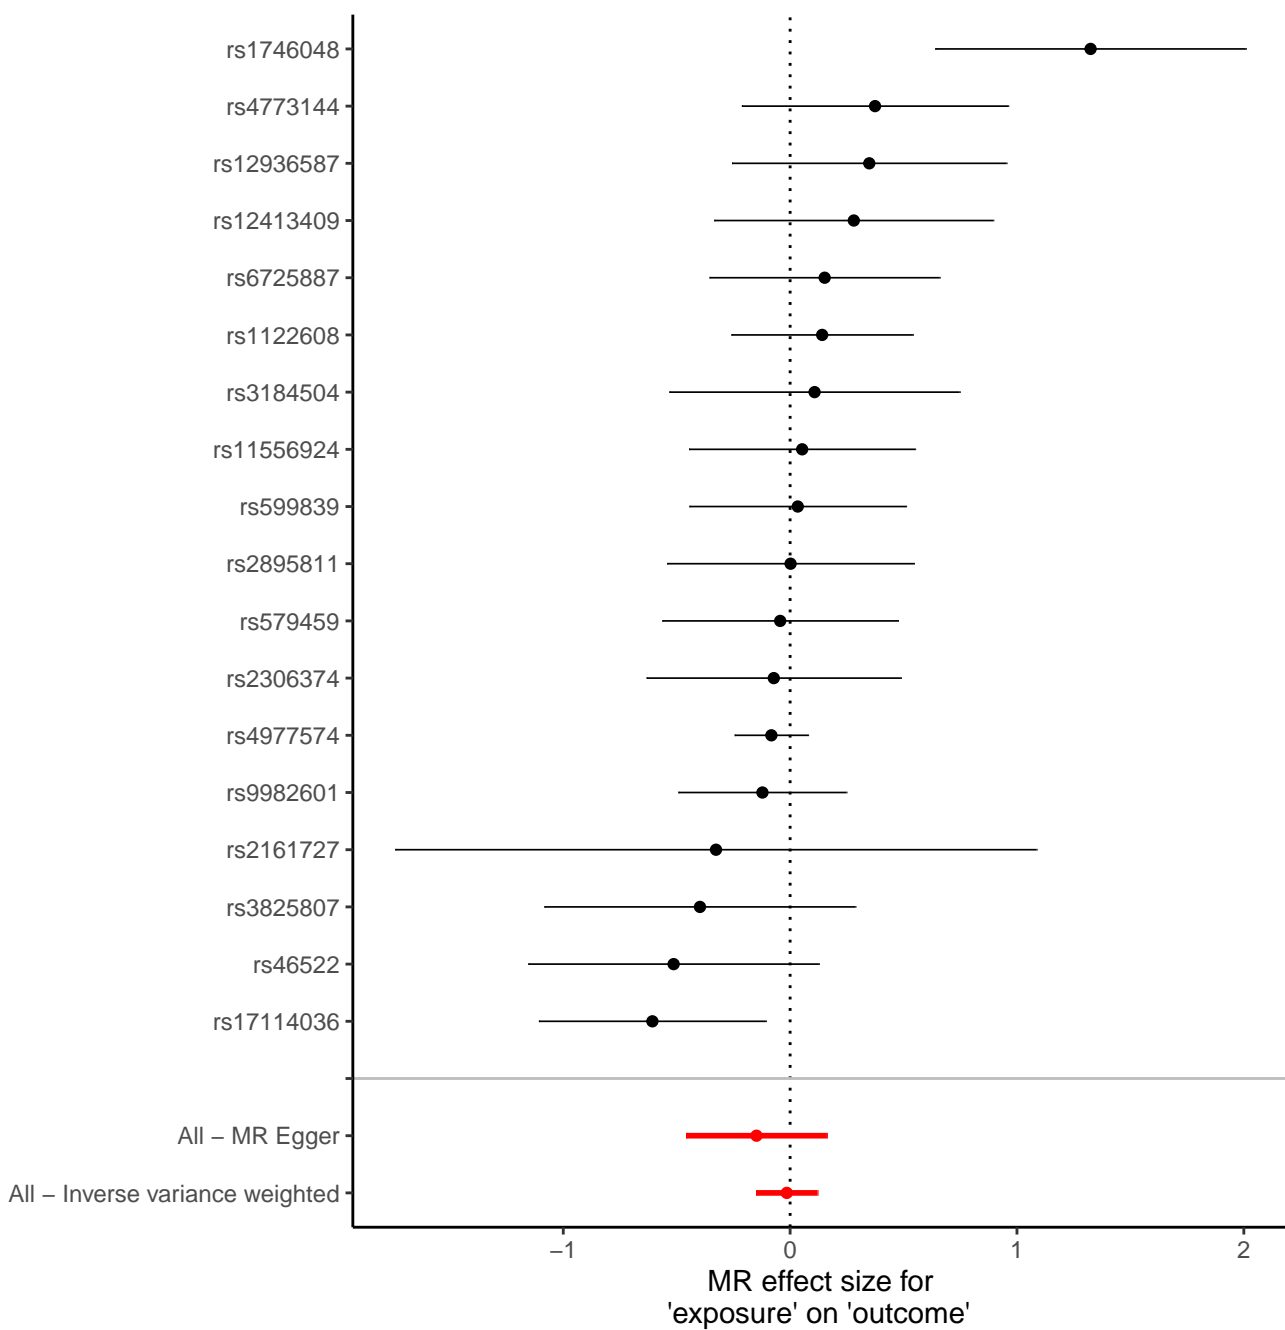



MR Test

- Inverse variance weighted
- MR Egger
- Simple mode
- Weighted median
- Weighted mode

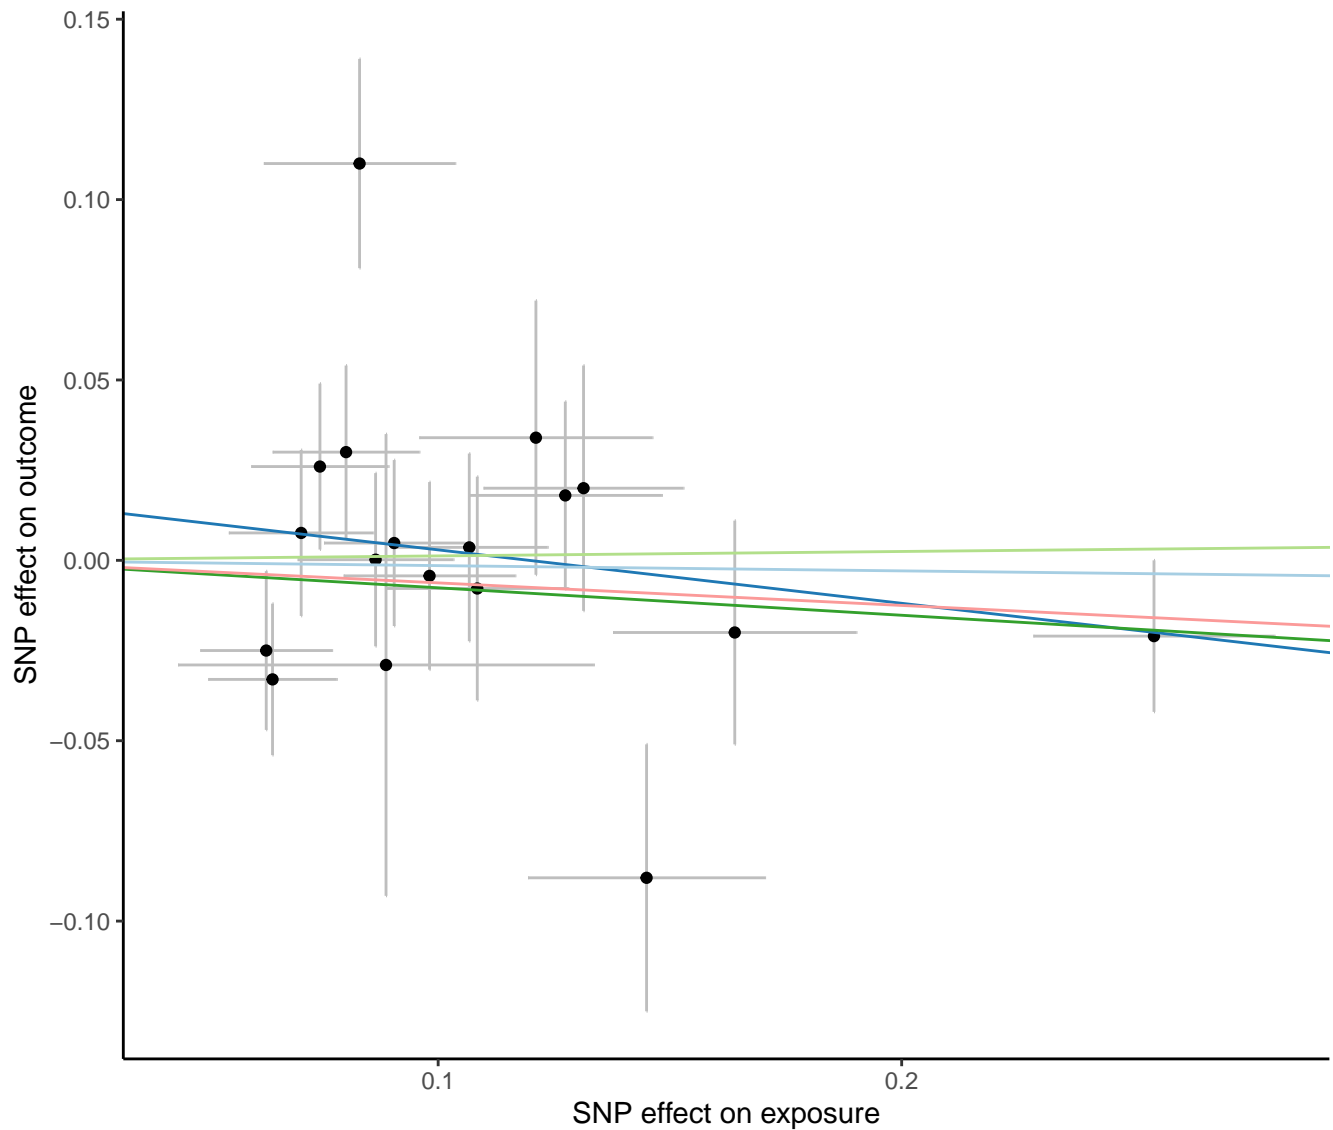

MR Method

Inverse variance weighted

MR Egger

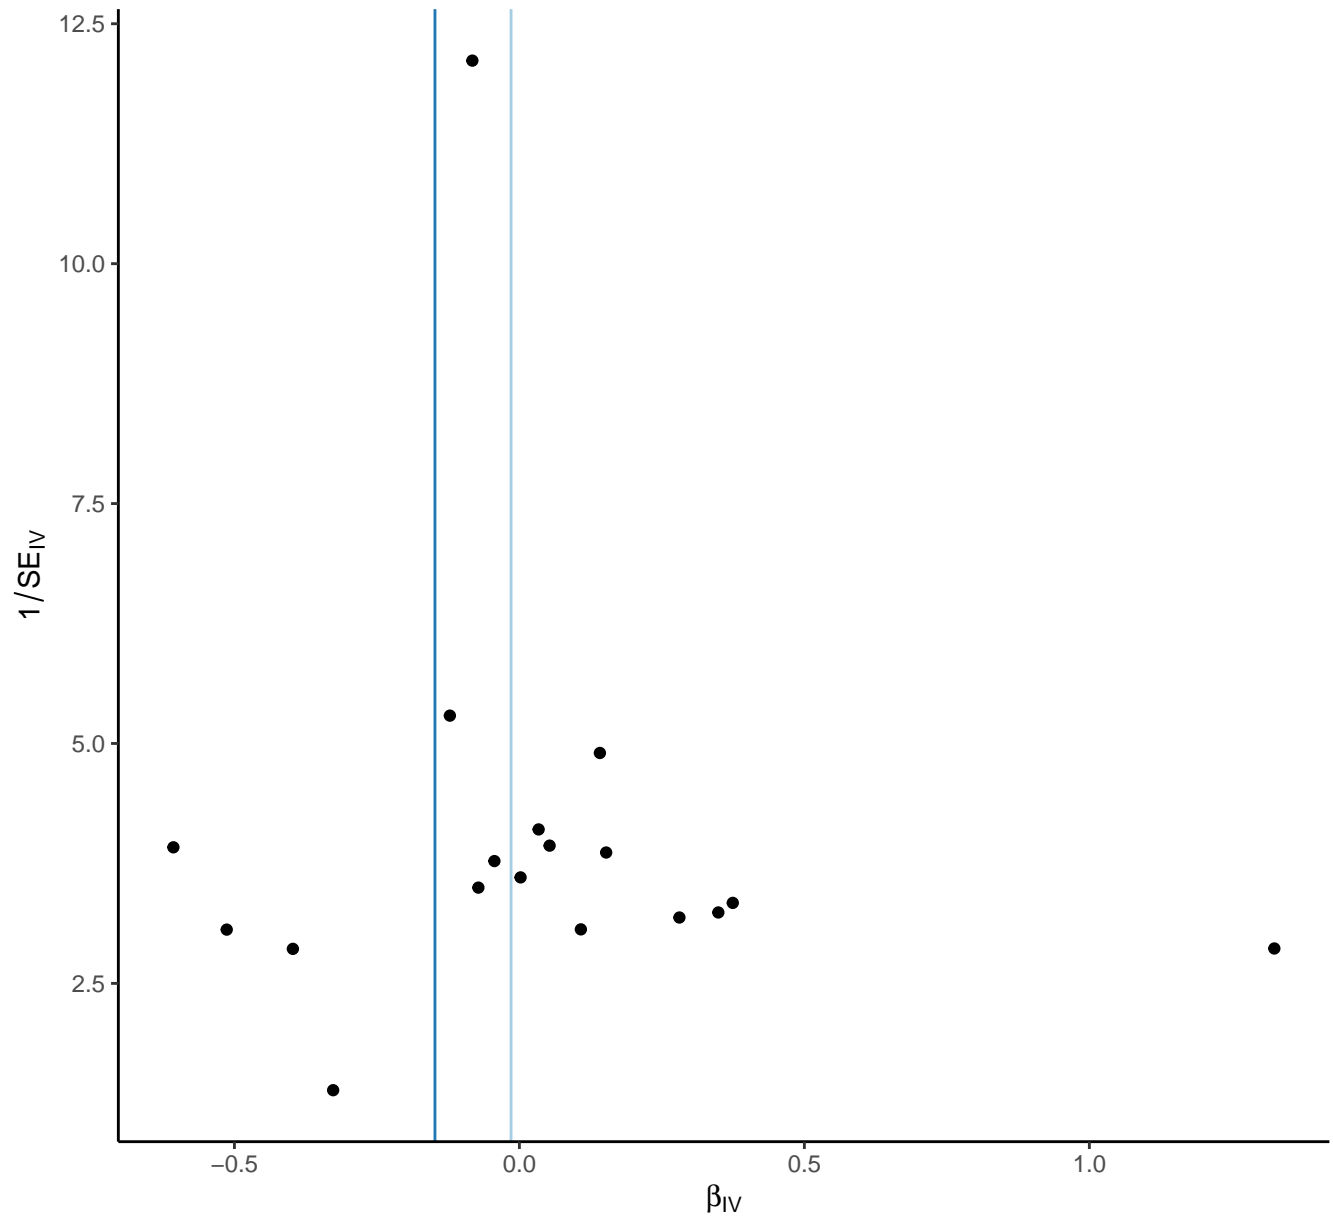

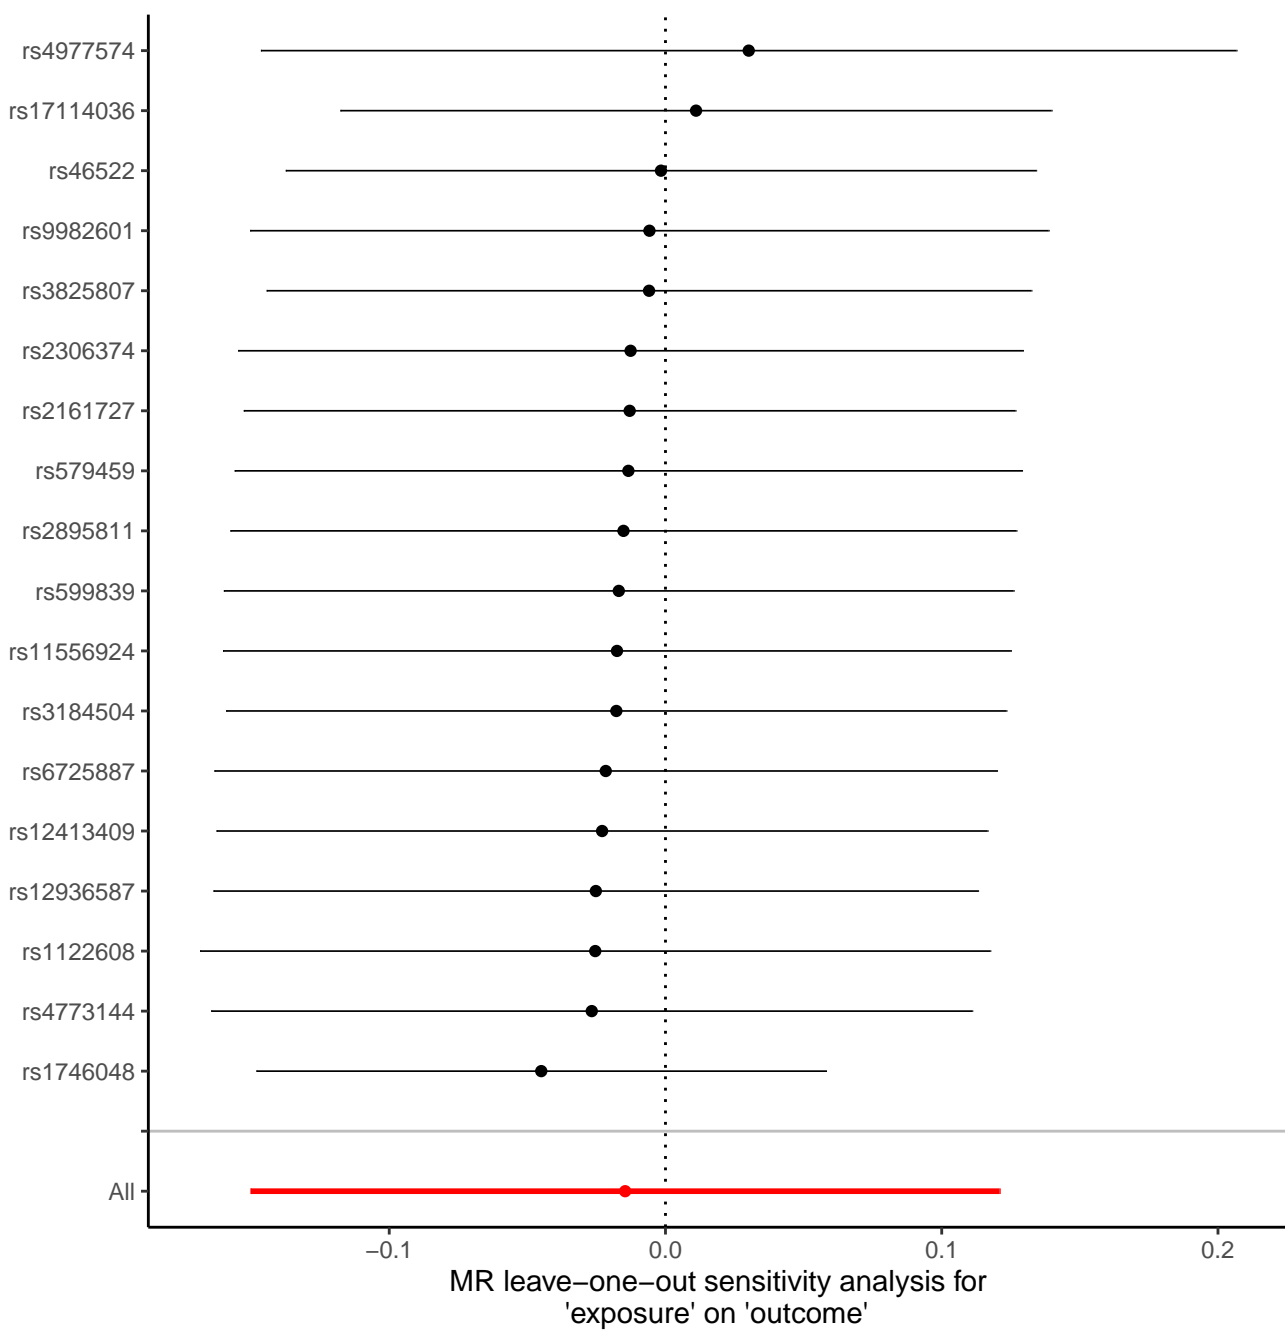

**Exposure: High Density Lipoprotein, Outcome: Corrected Insulin Response adjusted for ISI**  
**Figures of Forest Plot, Comparison of Different MR Methods, Funnel Plot and Leave-one-out Sensitivity Analysis**

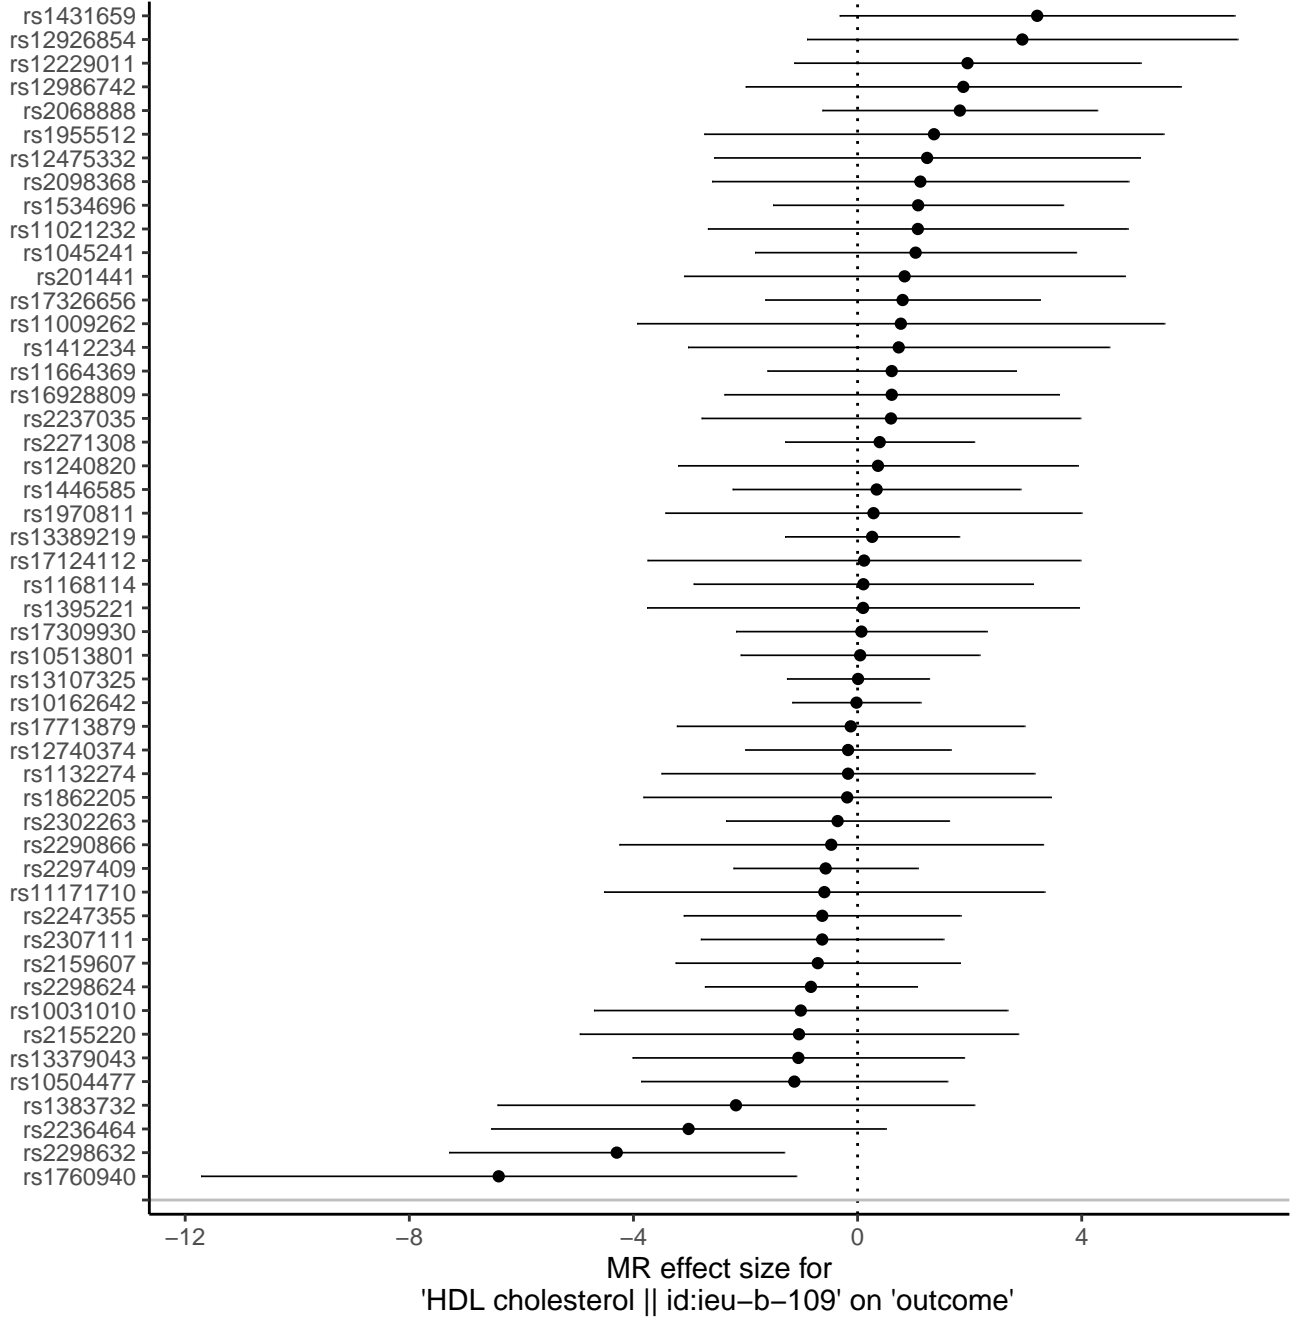

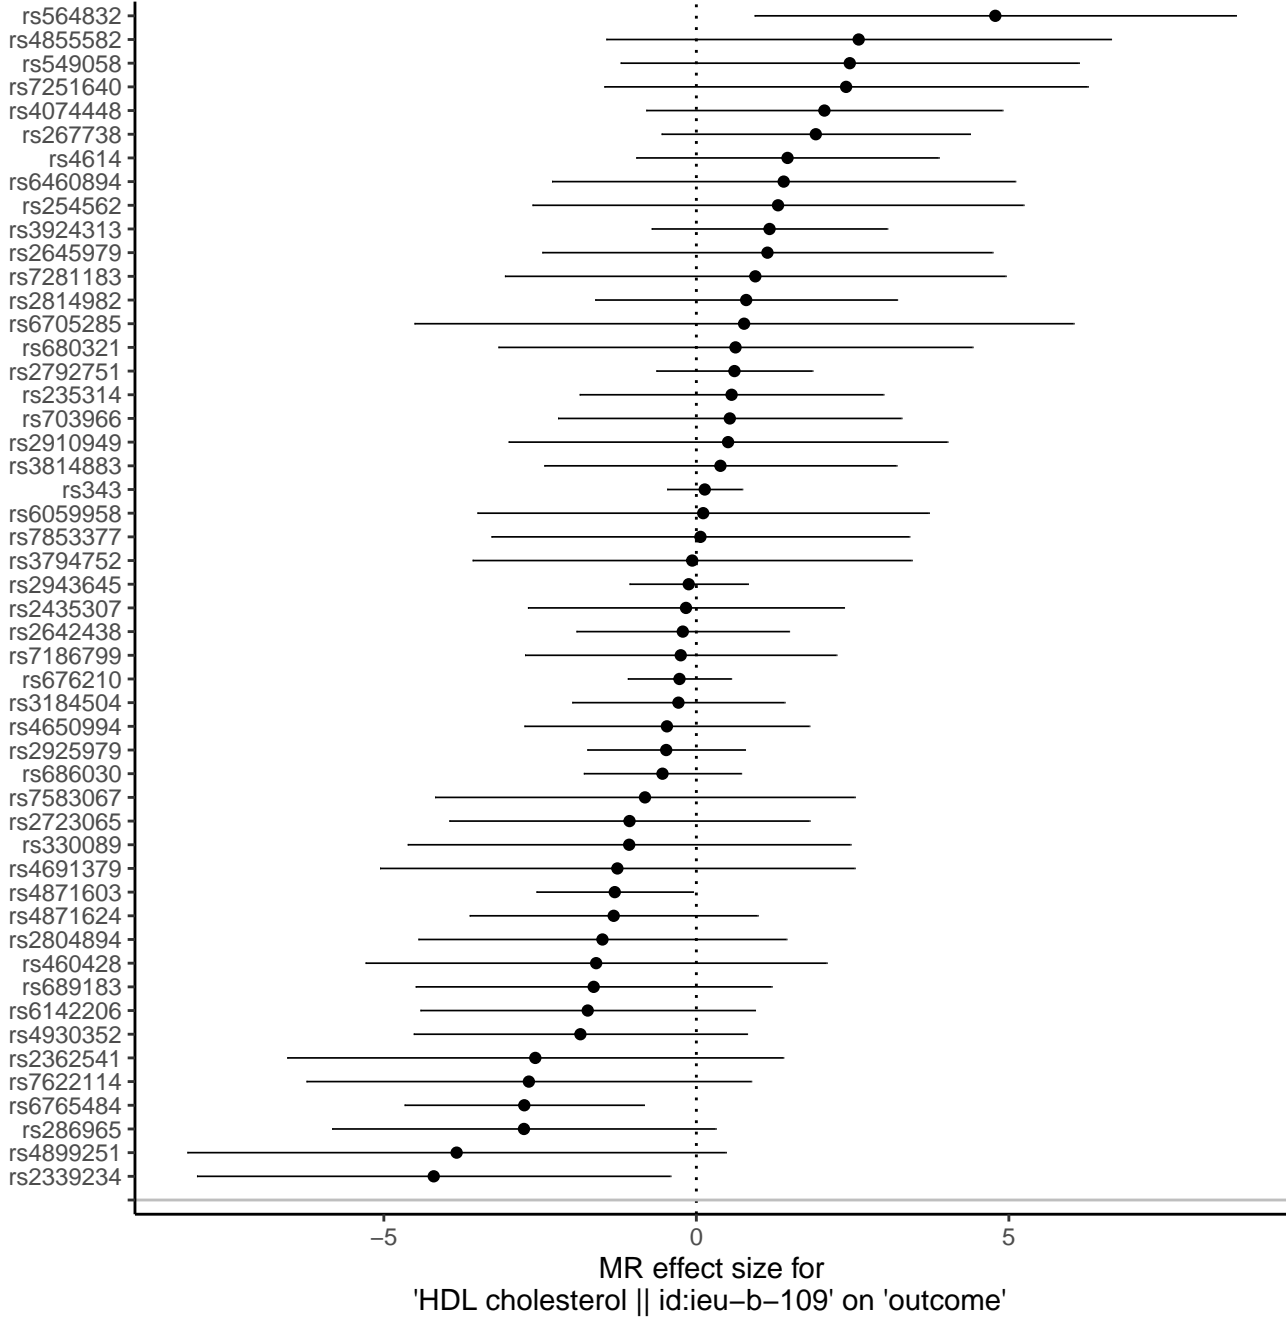

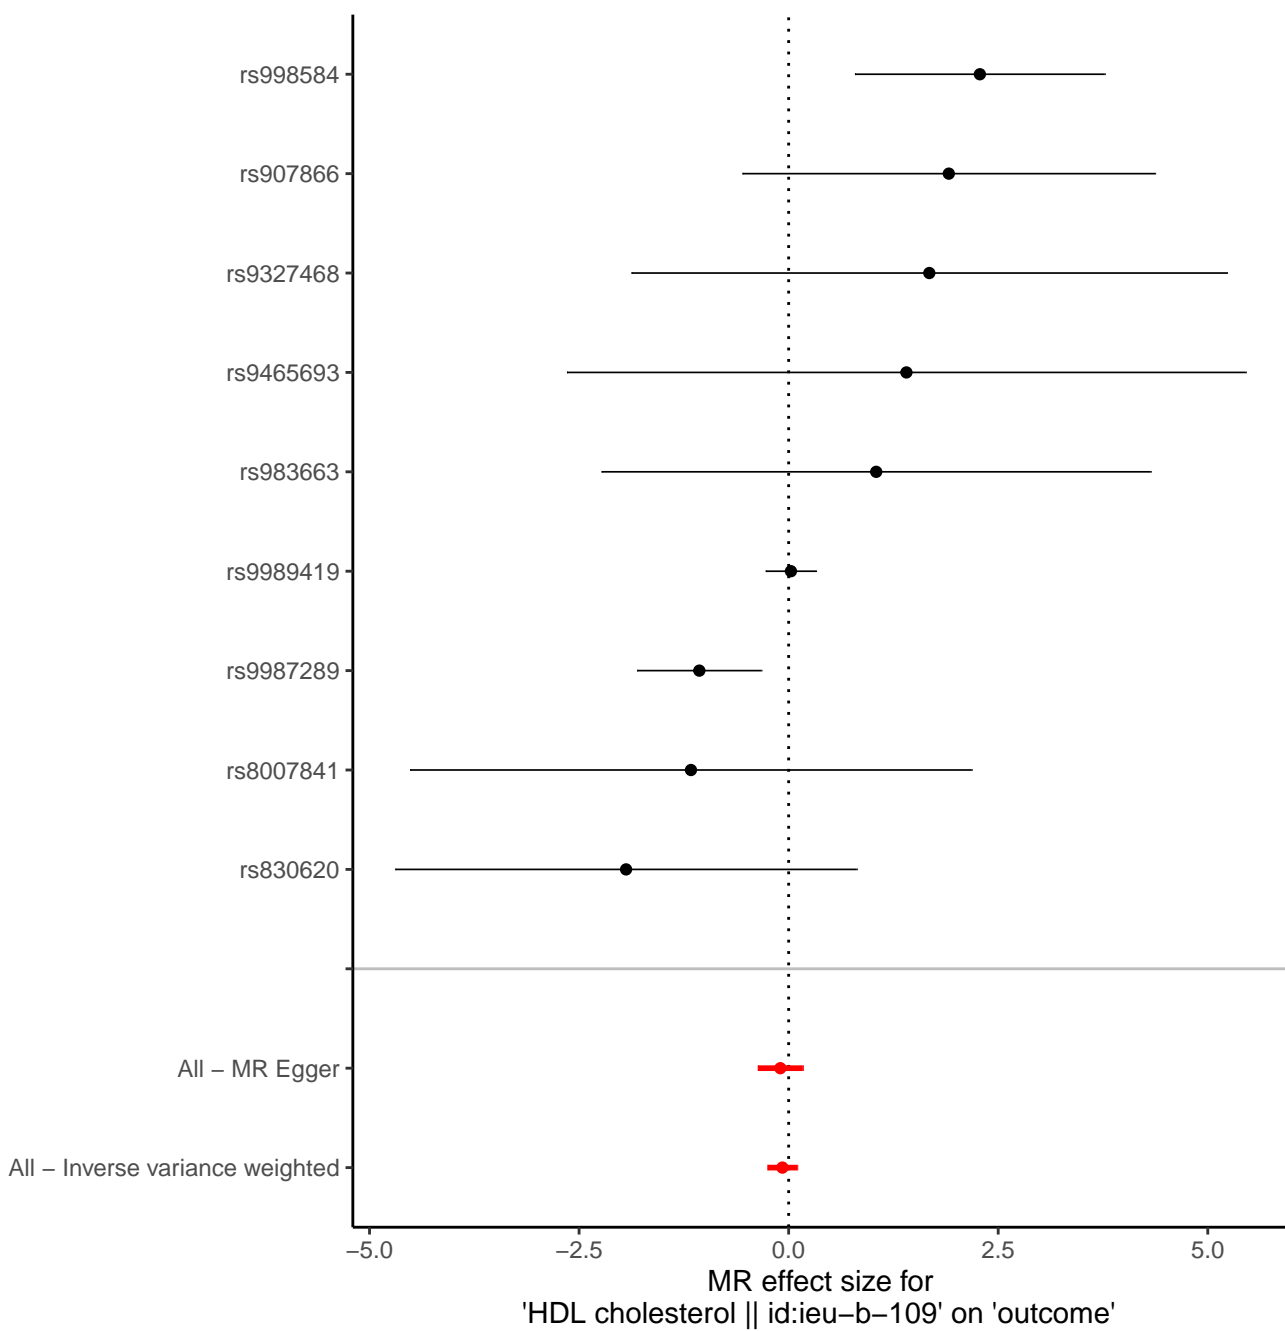

MR Test

- Inverse variance weighted
- MR Egger
- Simple mode
- Weighted median
- Weighted mode

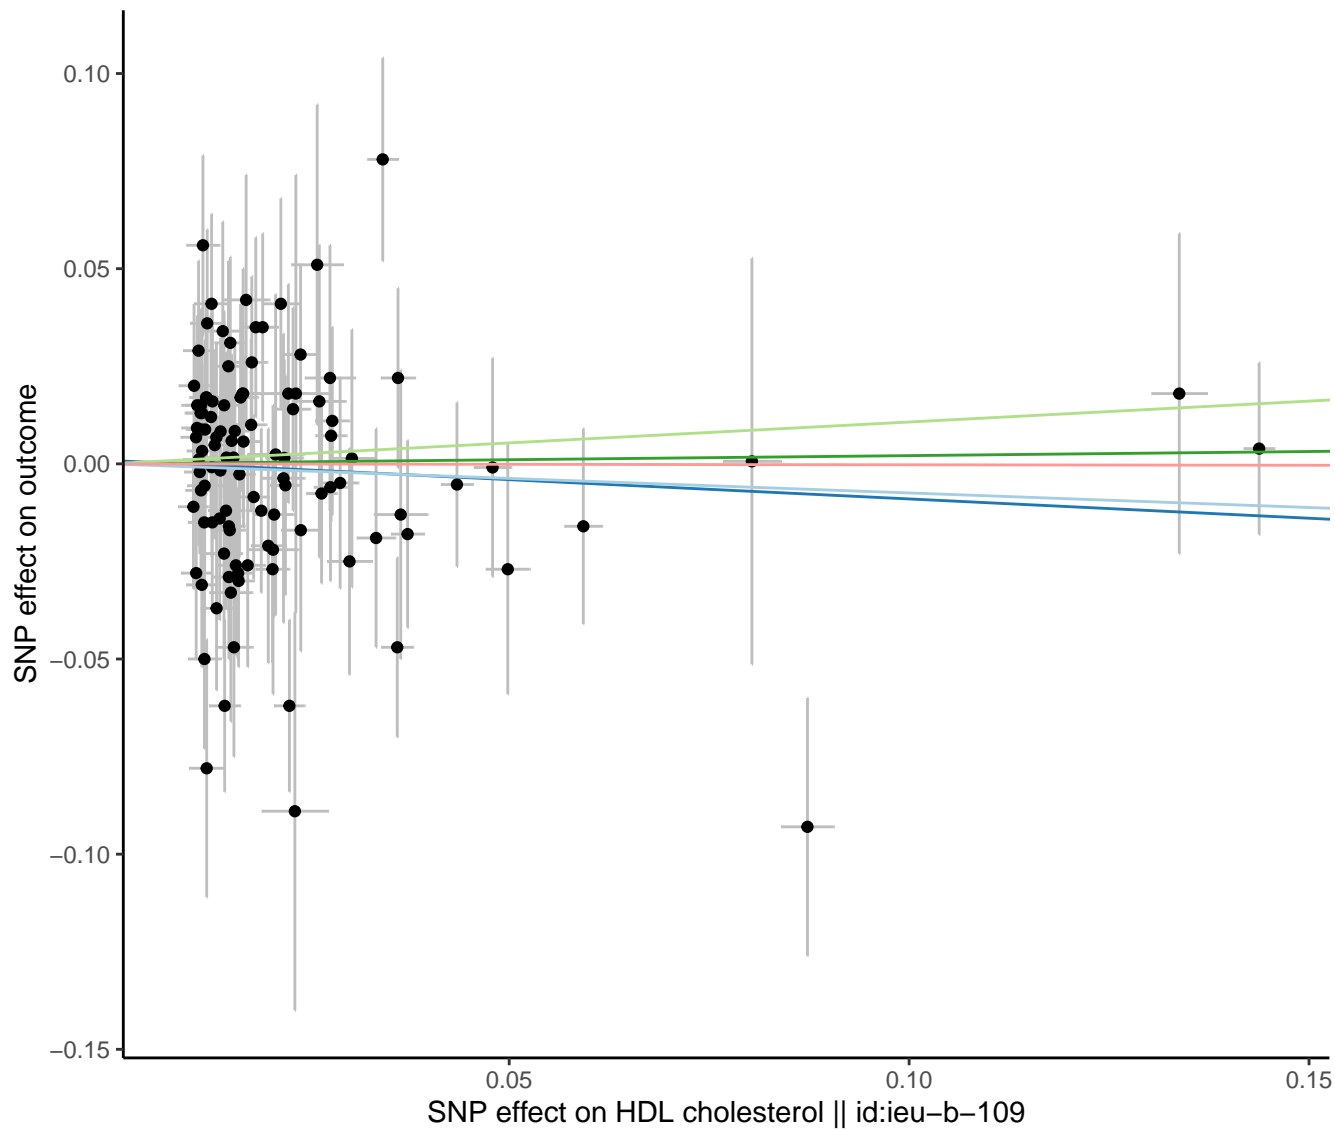



MR Method

Inverse variance weighted

MR Egger

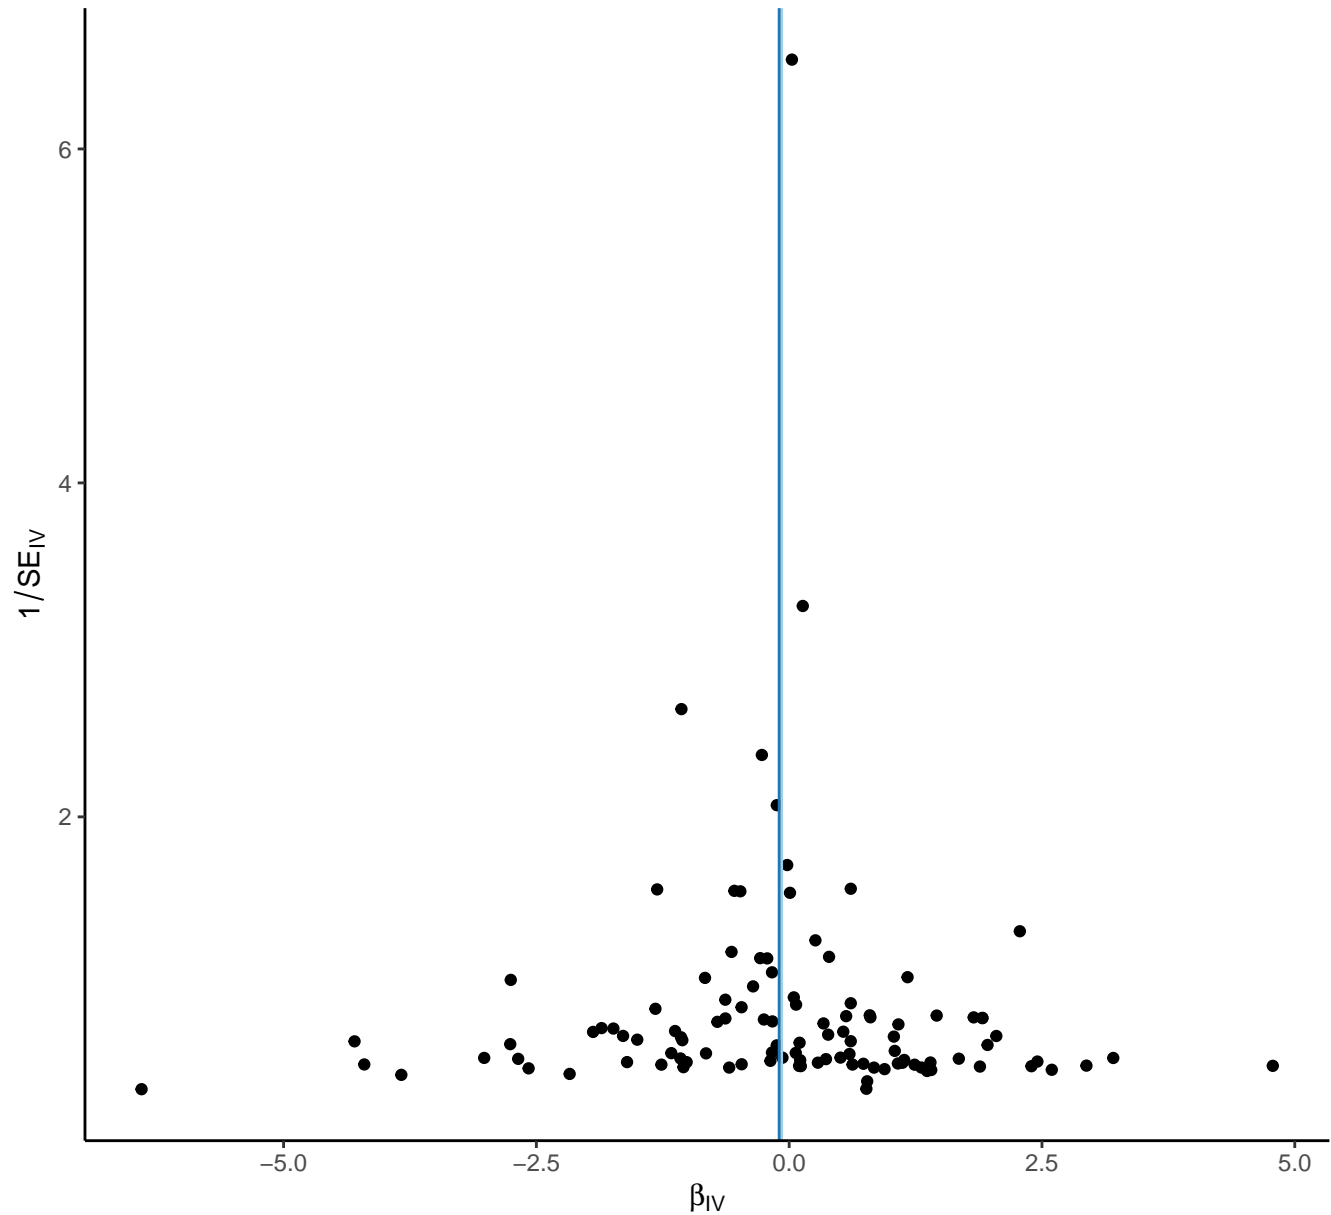

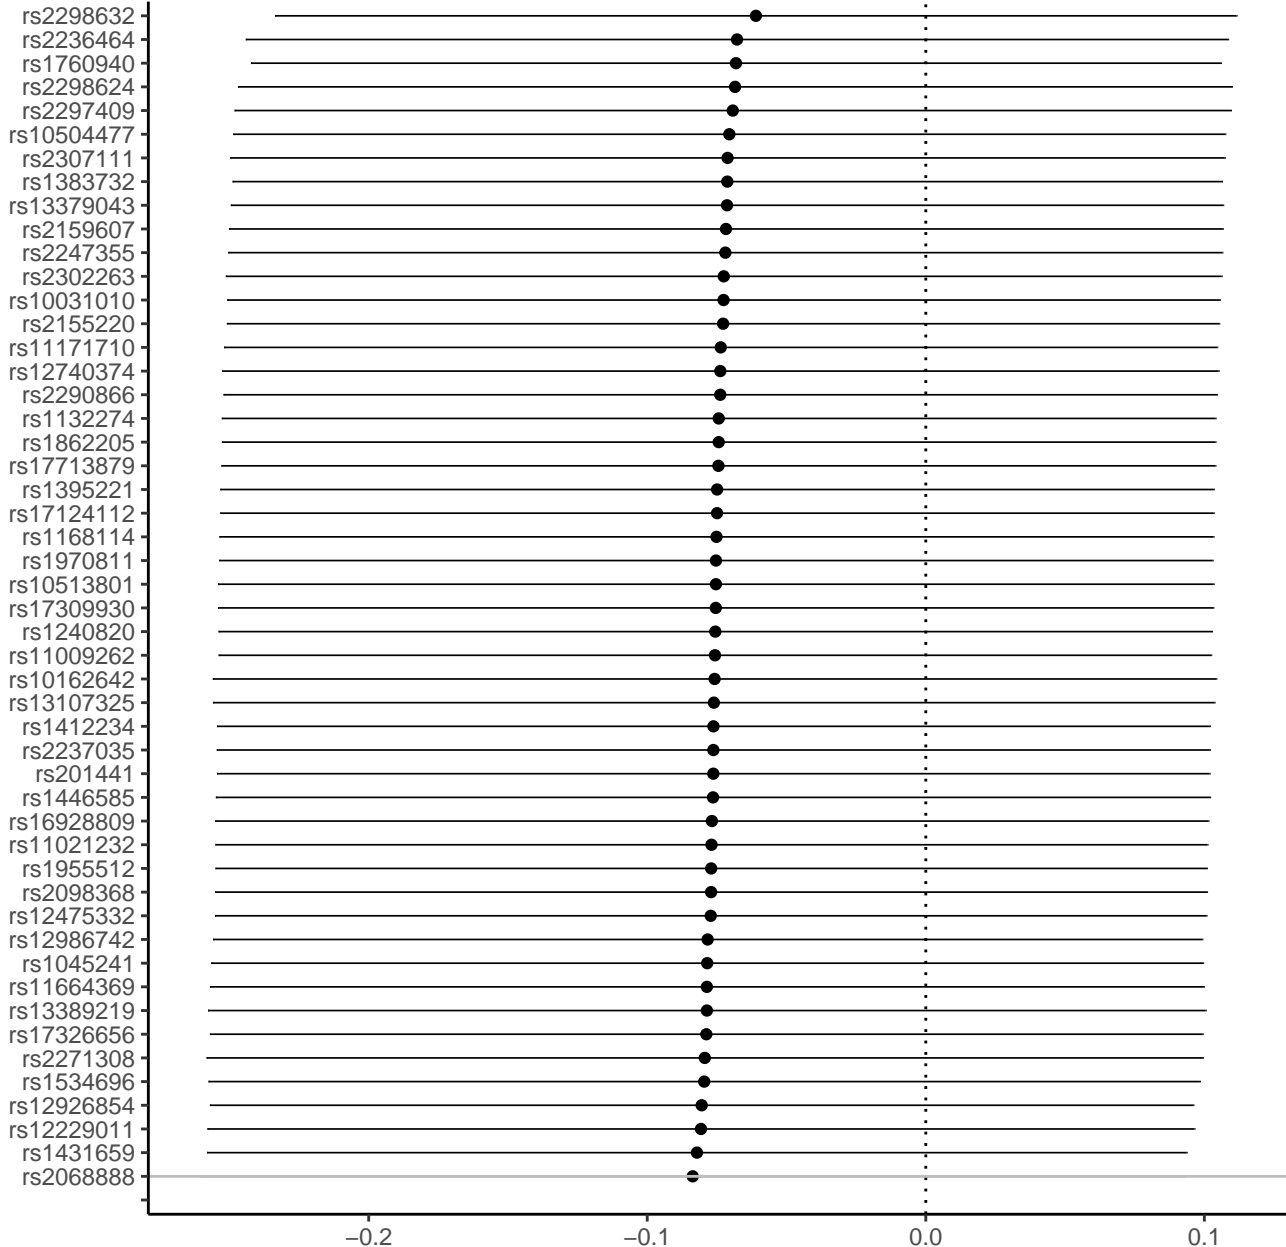

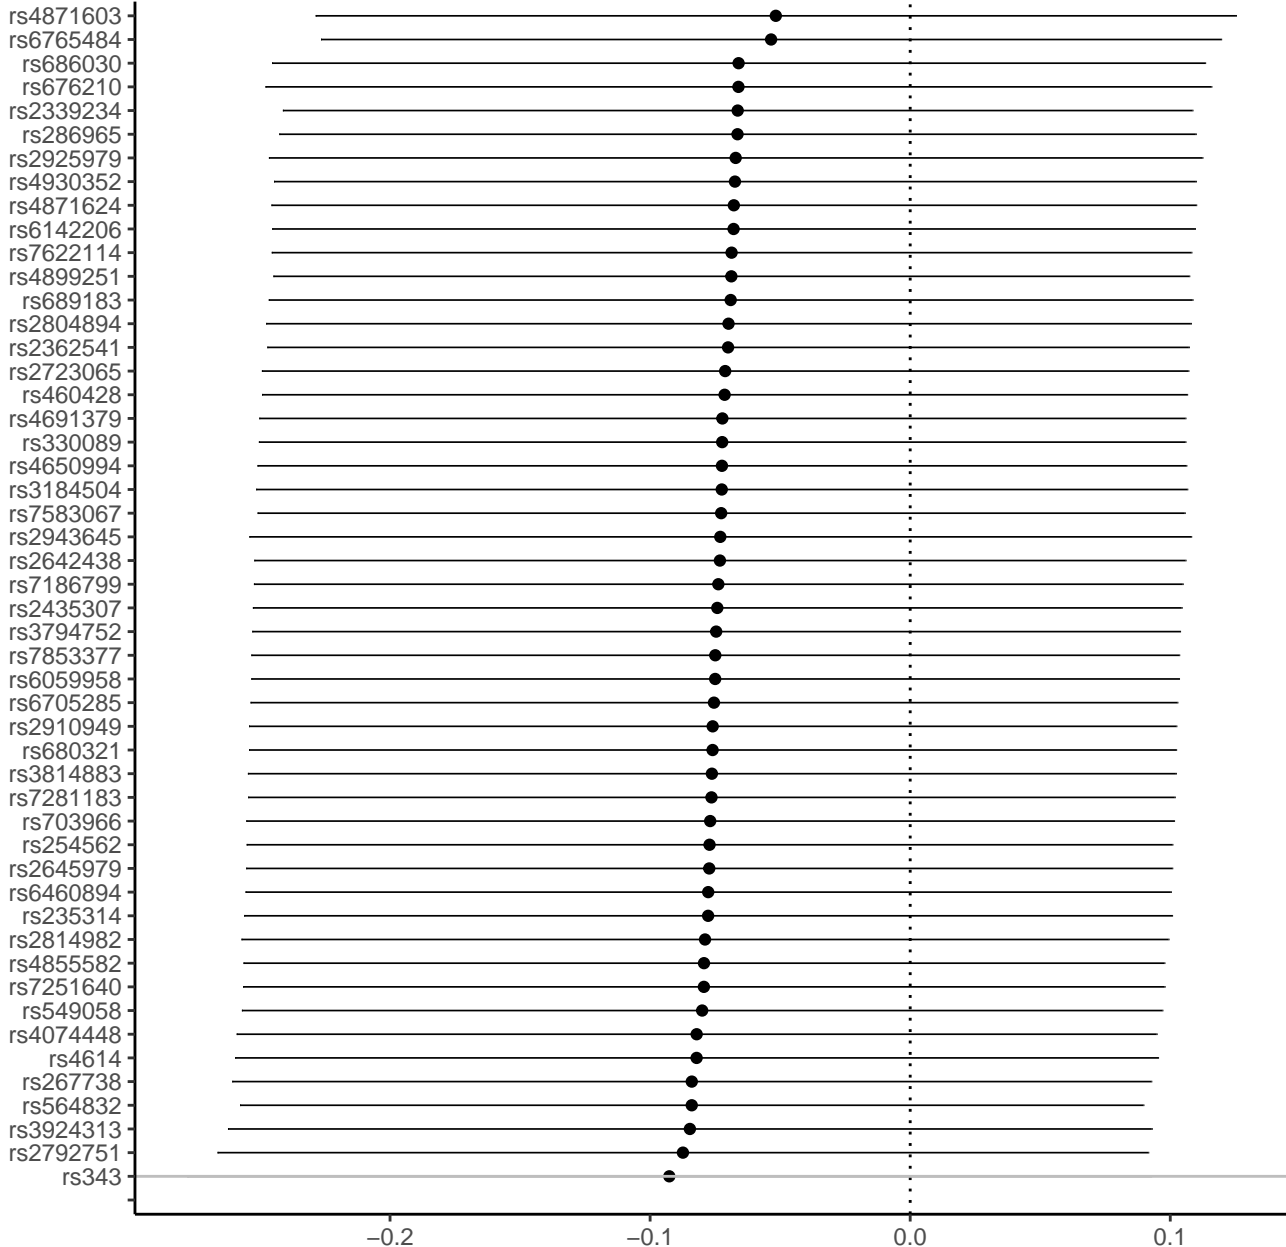

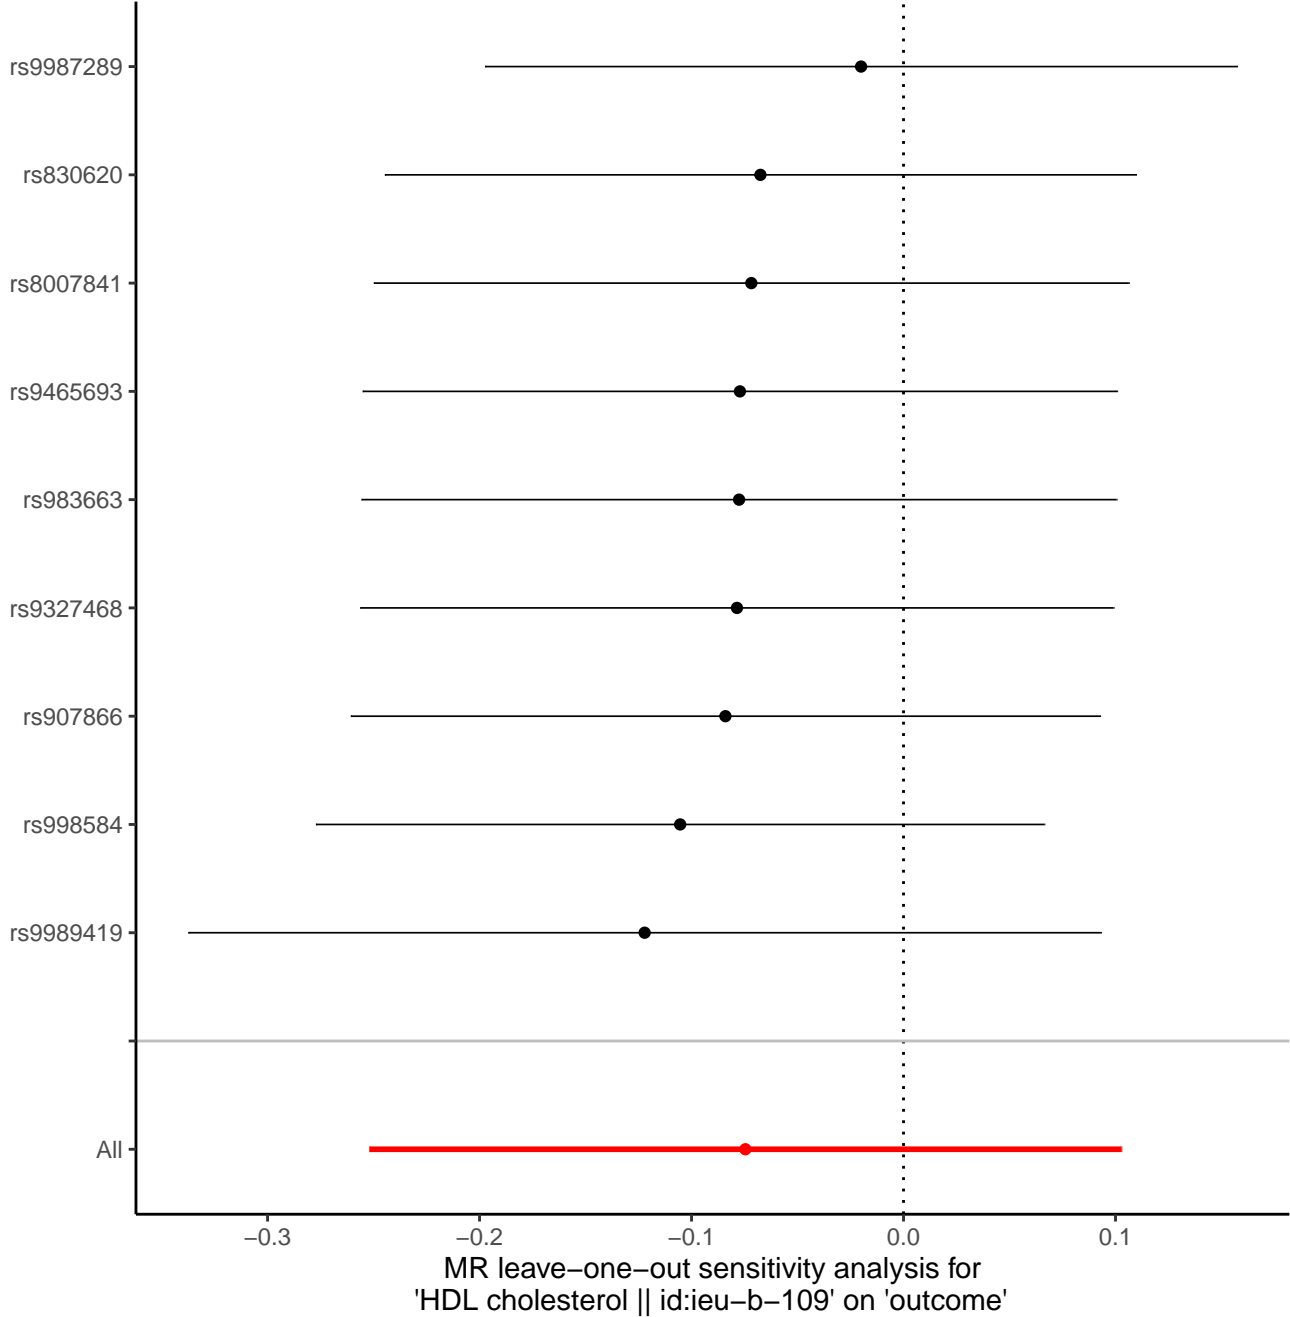

**Exposure: Hypertension, Outcome: Corrected Insulin Response adjusted for ISI**  
**Figures of Forest Plot, Comparison of Different MR Methods, Funnel Plot and Leave-one-out Sensitivity Analysis**

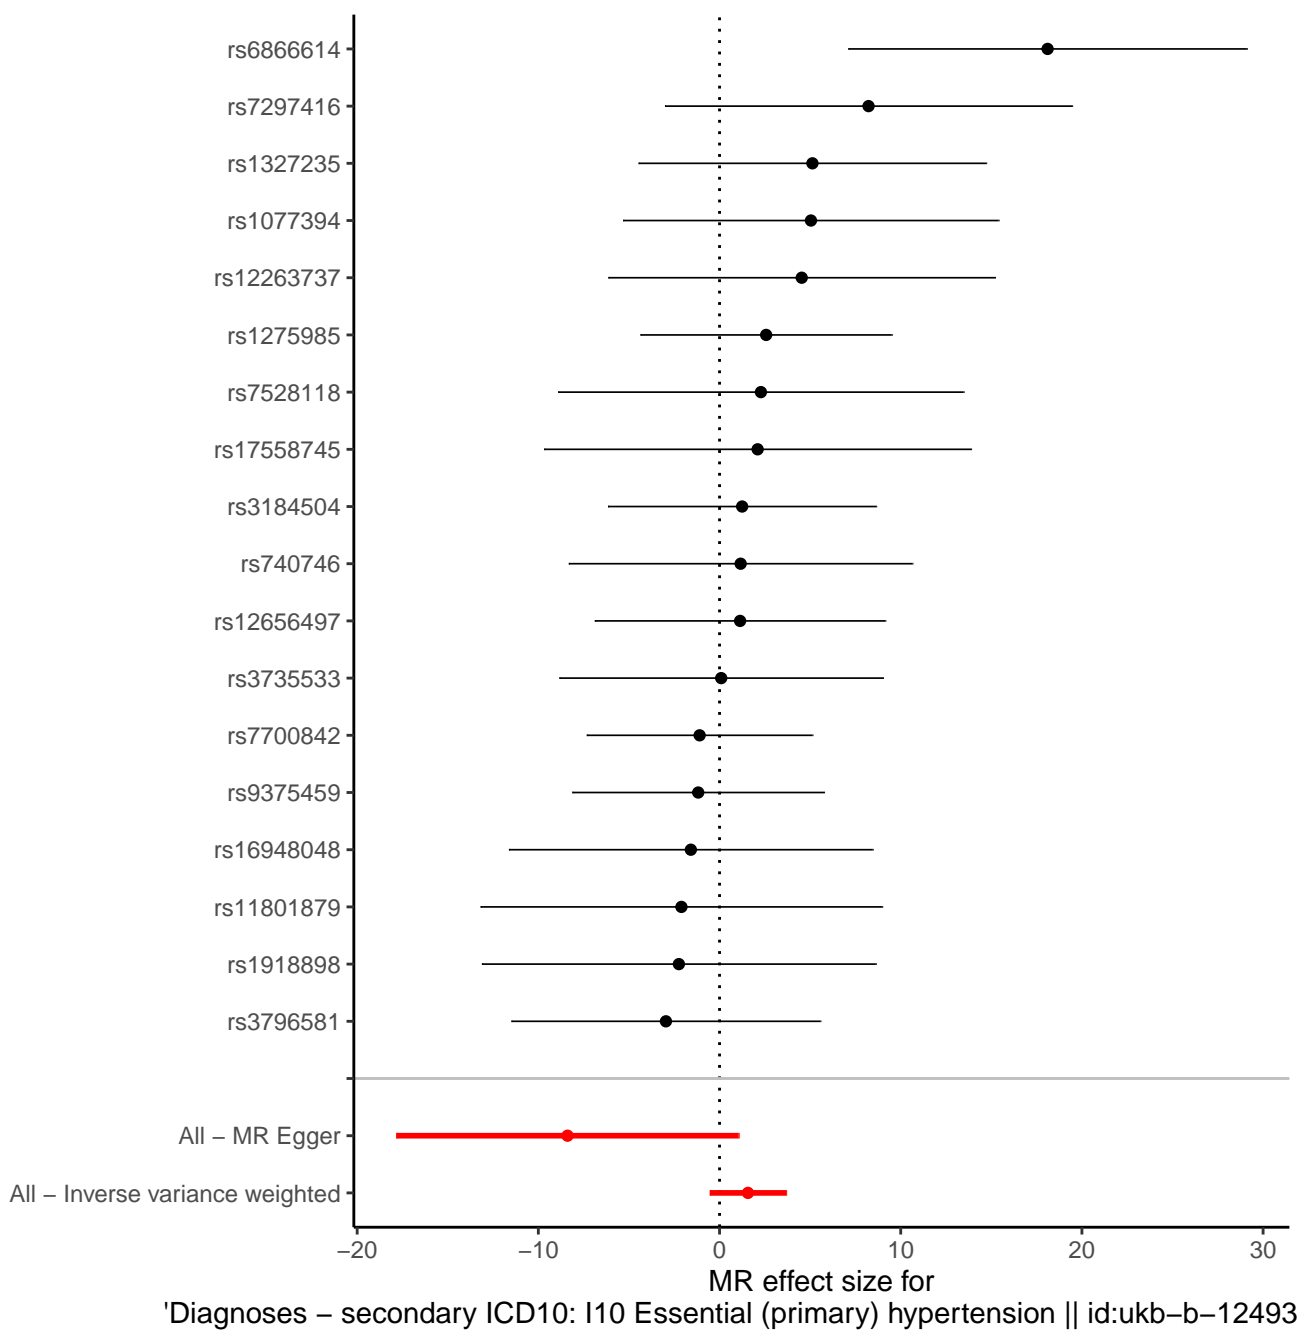

MR Test

- Inverse variance weighted
- MR Egger
- Simple mode
- Weighted median
- Weighted mode

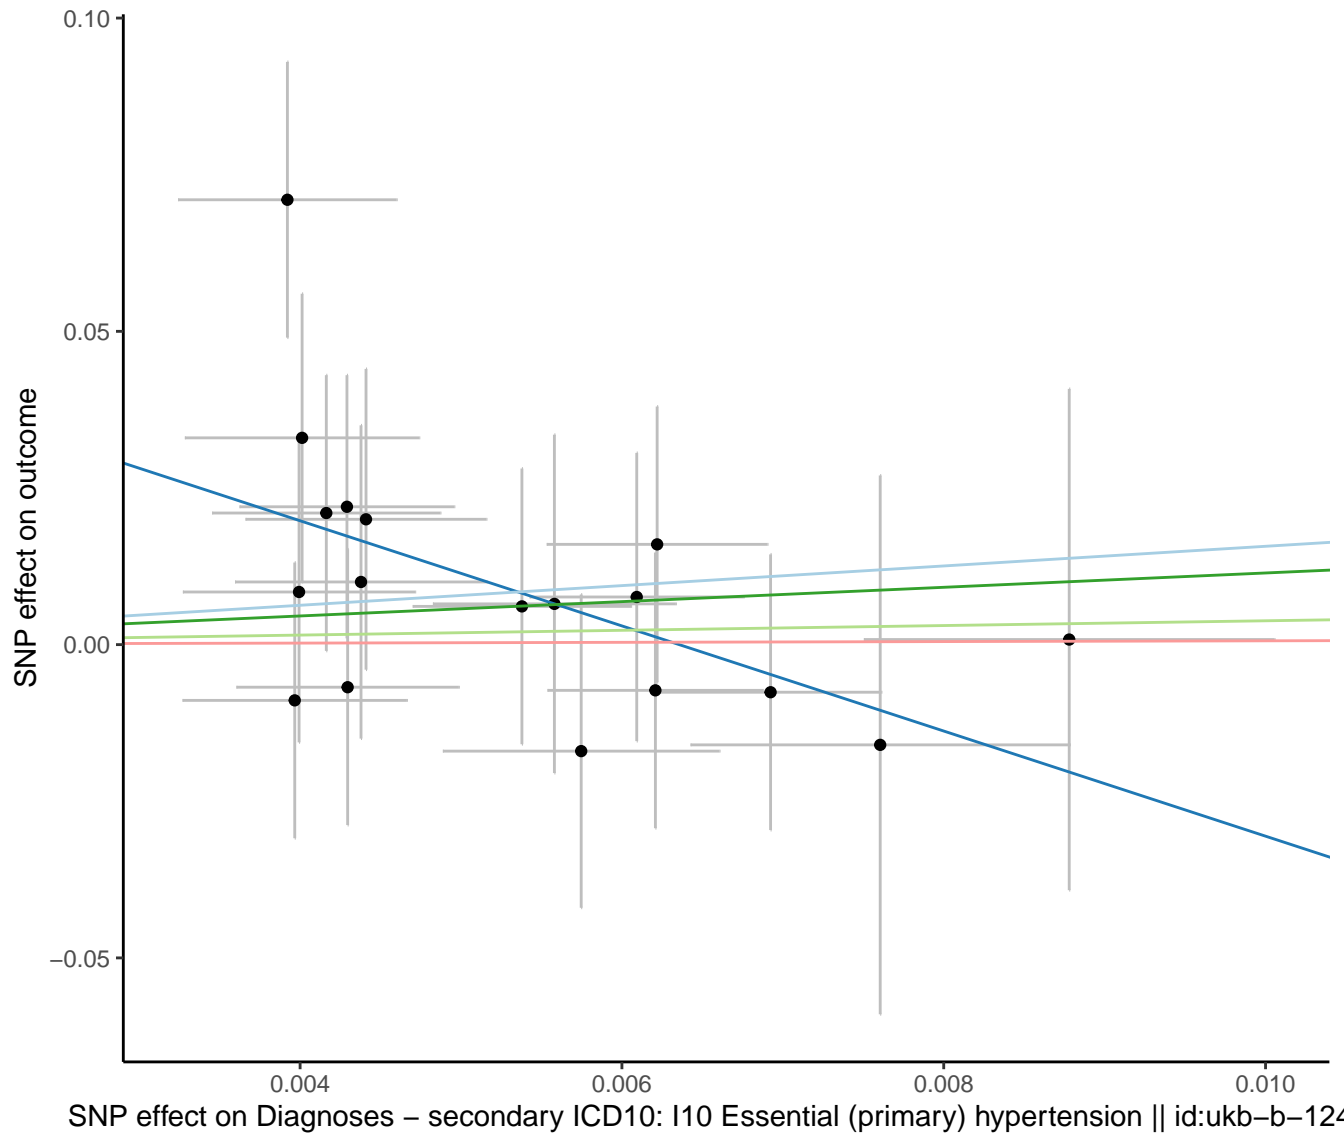

MR Method

Inverse variance weighted

MR Egger

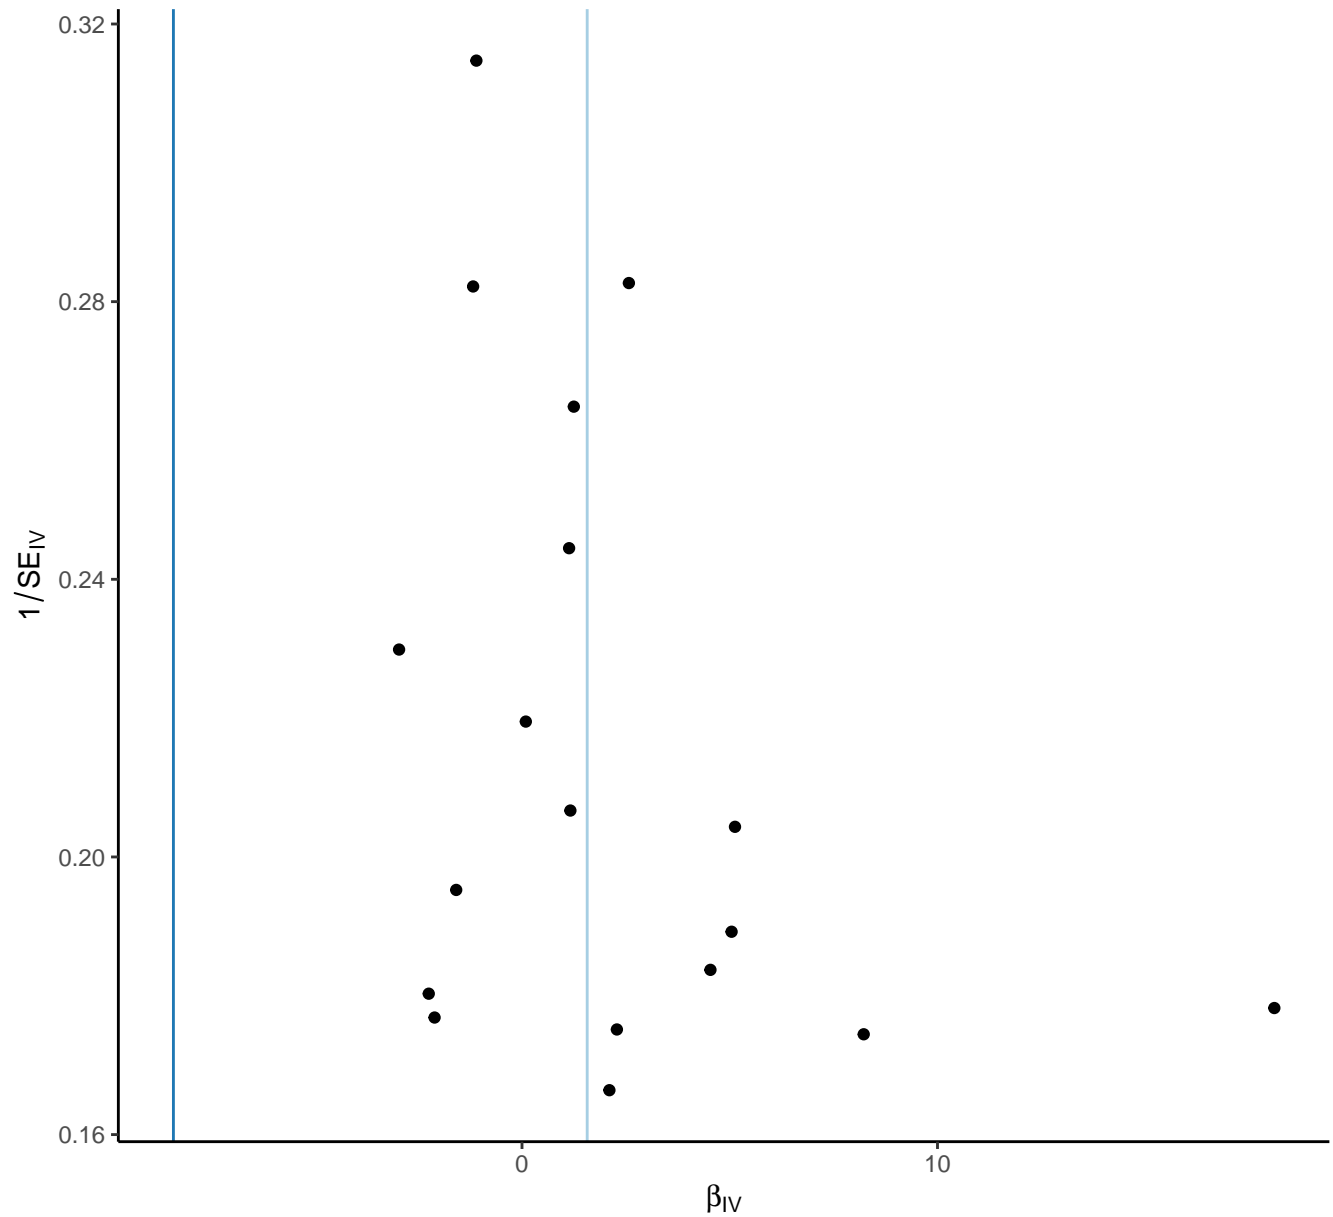



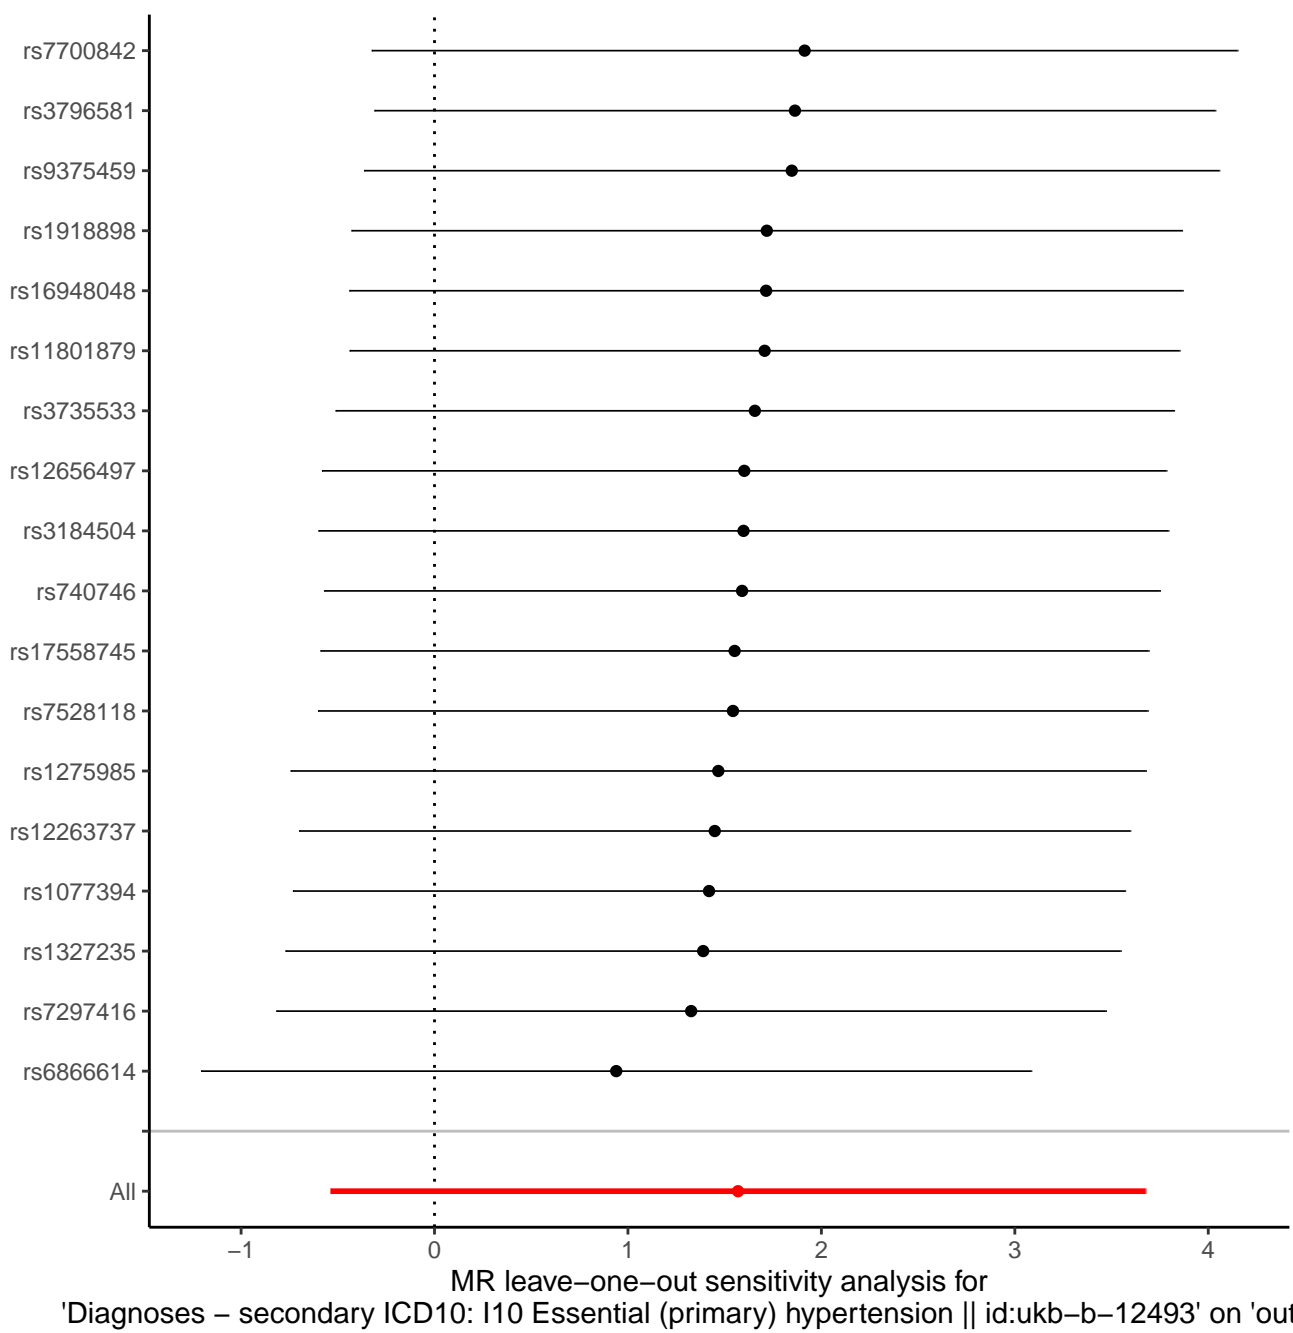

**Exposure: Leg Fat Percent - Left, Outcome: Corrected Insulin Response adjusted for ISI**  
**Figures of Forest Plot, Comparison of Different MR Methods, Funnel Plot and Leave-one-out Sensitivity Analysis**

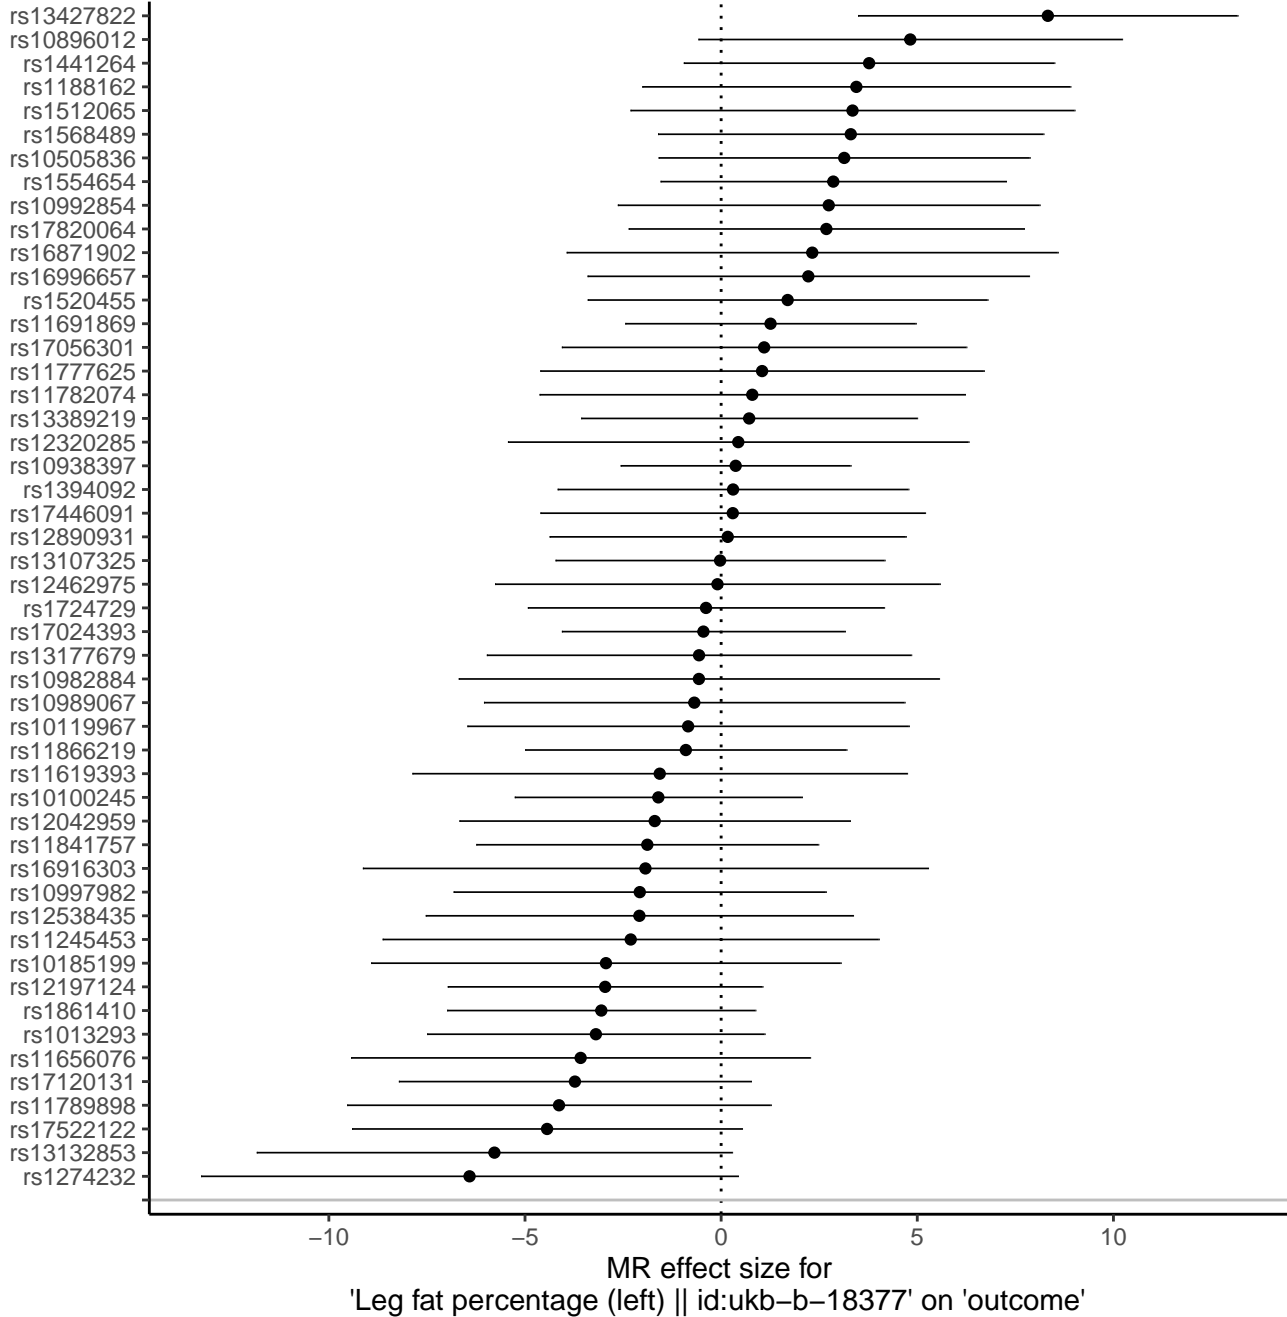

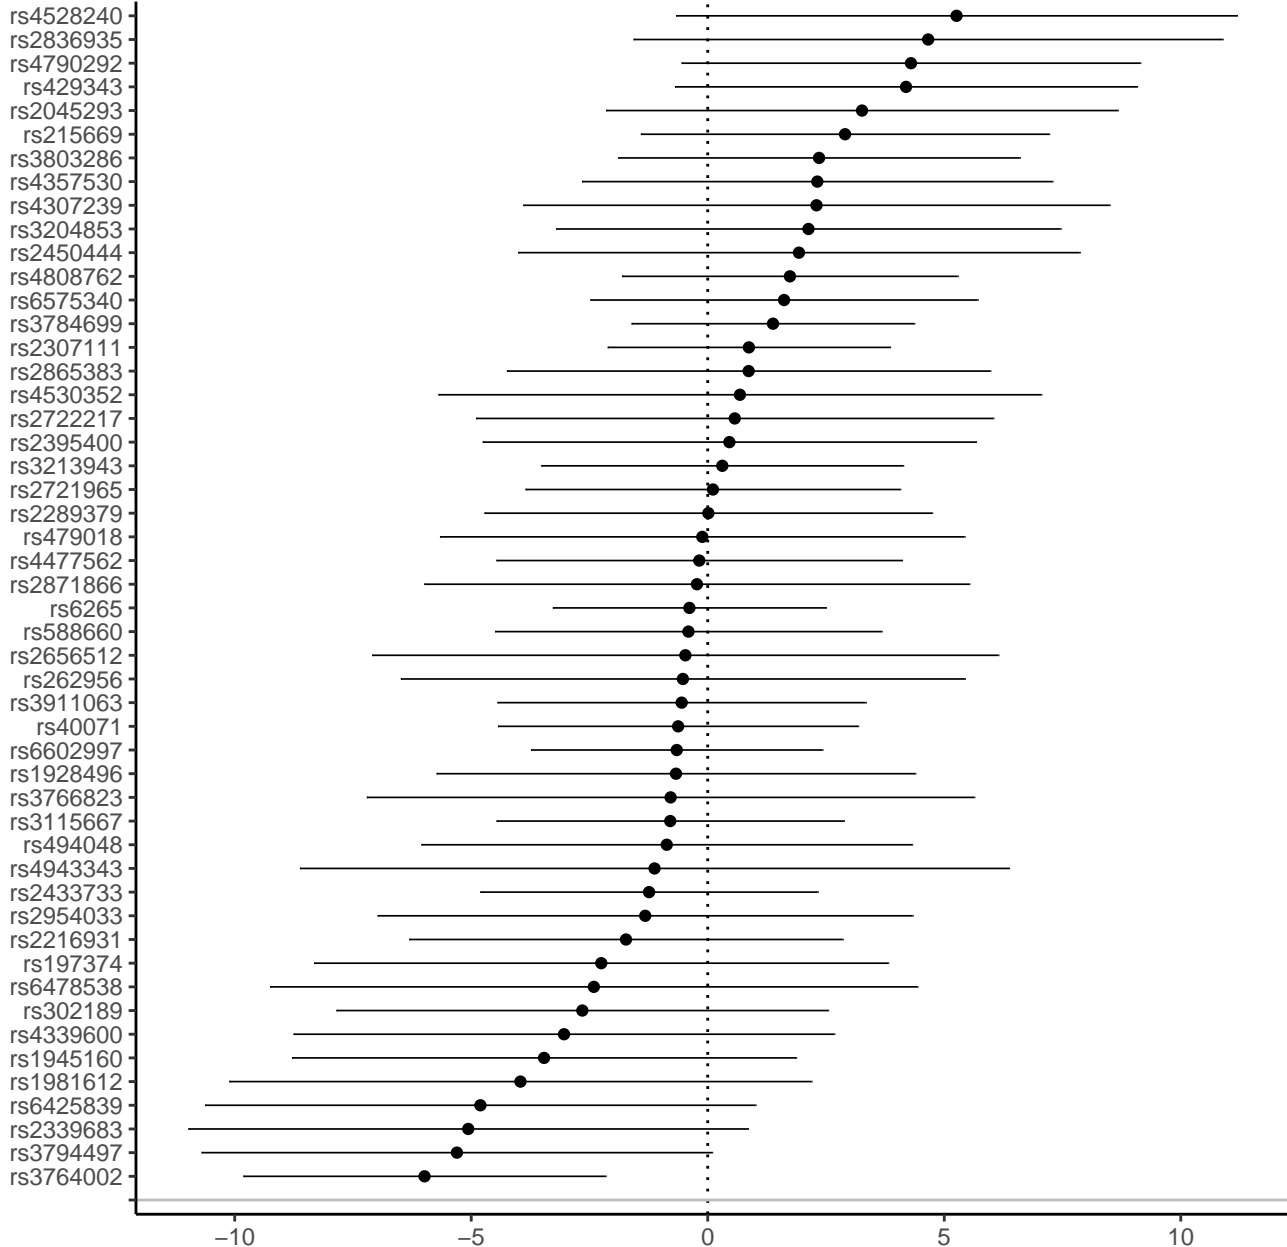

MR effect size for  
'Leg fat percentage (left) || id:ukb-b-18377' on 'outcome'

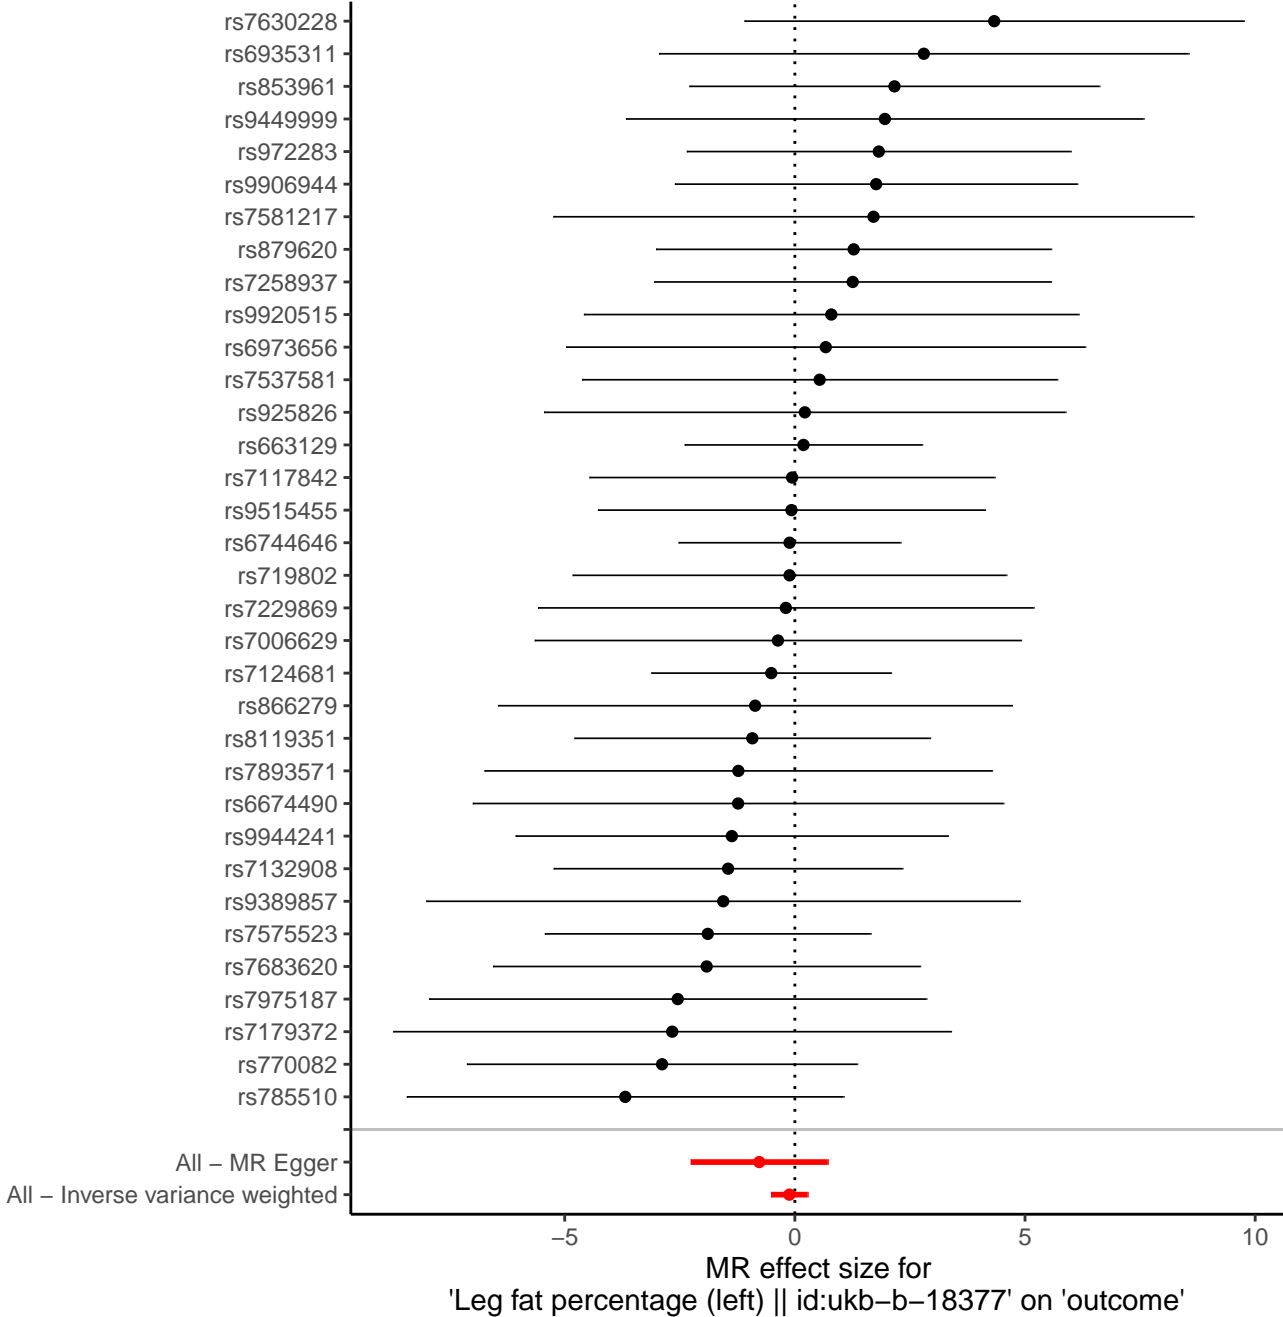

MR Test

- Inverse variance weighted
- MR Egger
- Simple mode
- Weighted median
- Weighted mode

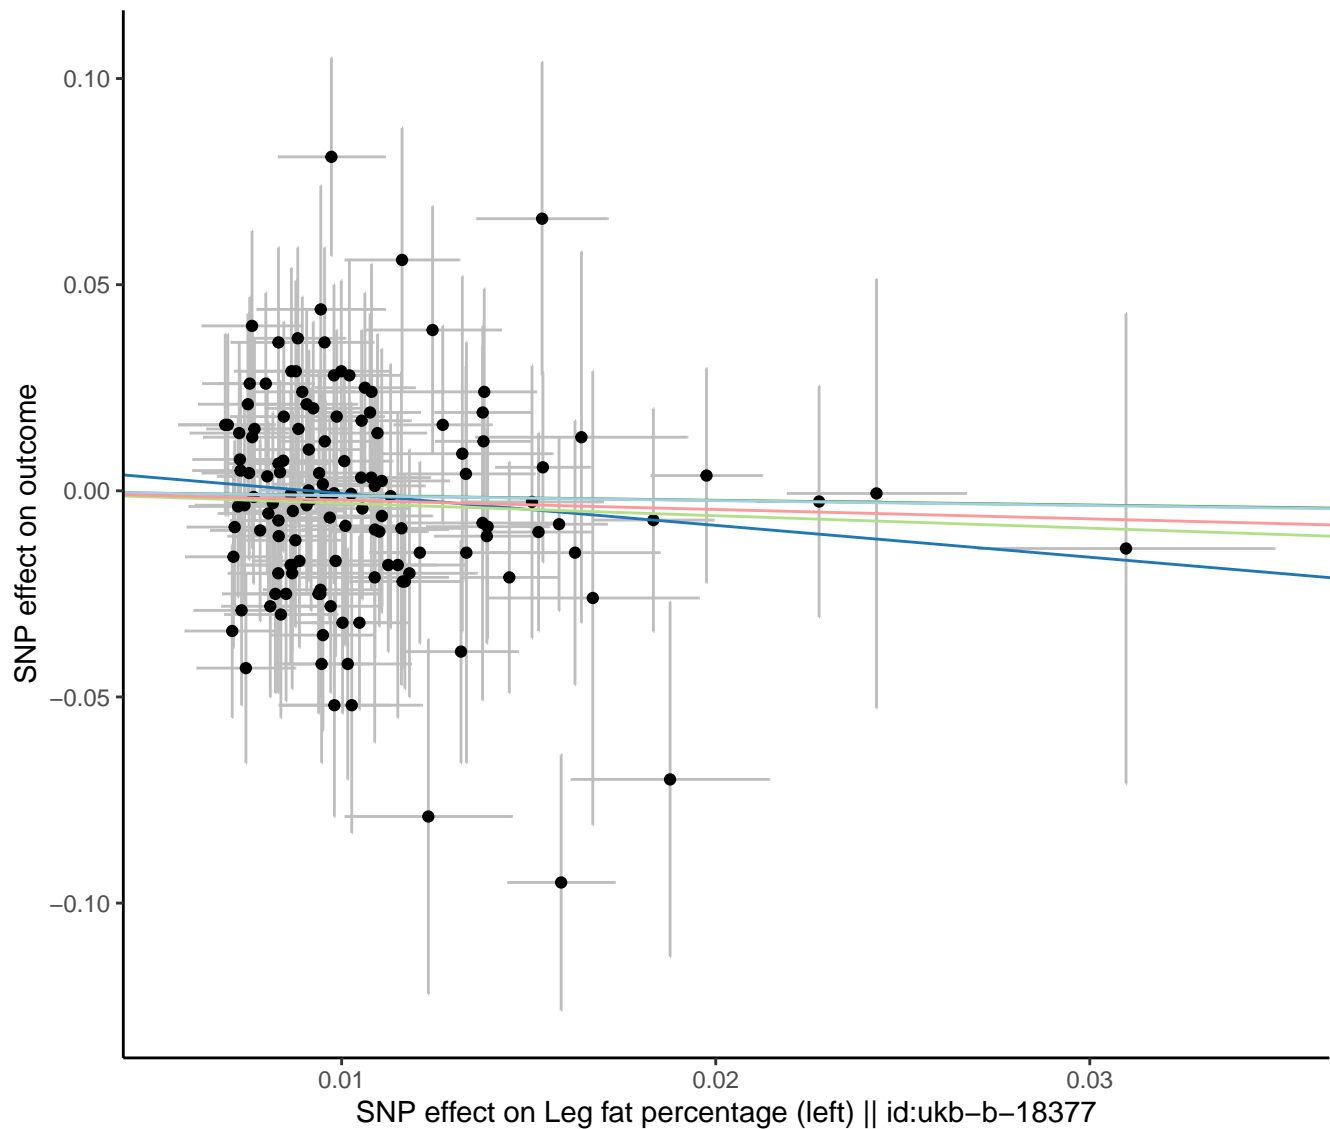

MR Method

Inverse variance weighted

MR Egger

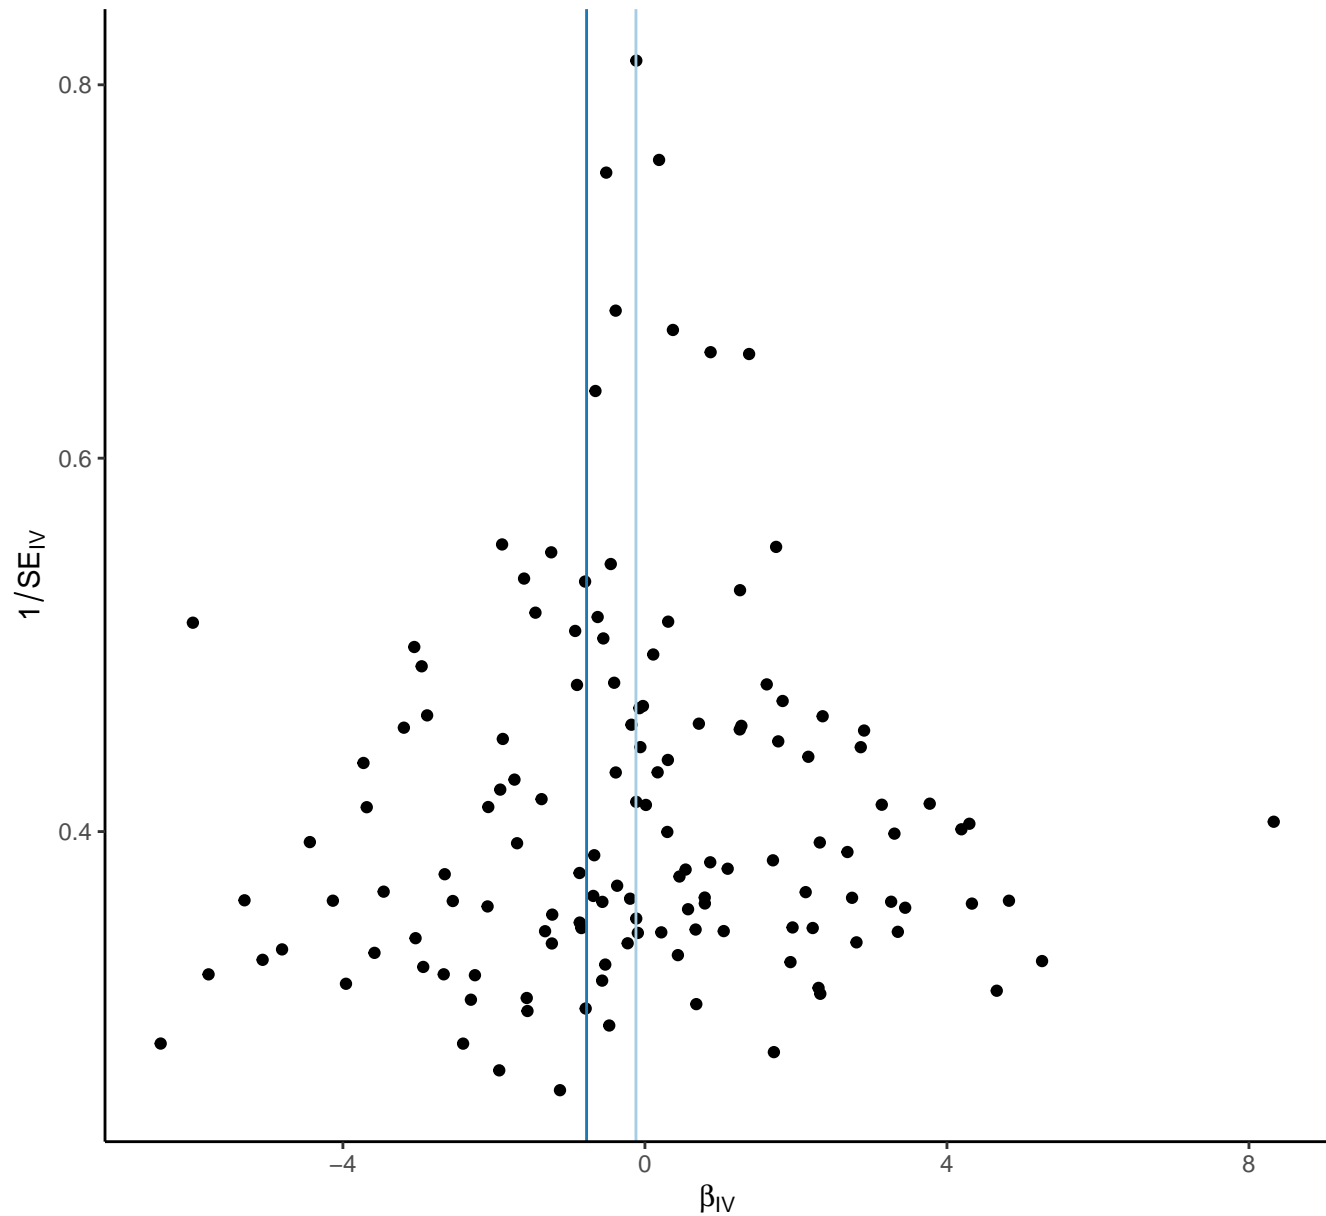

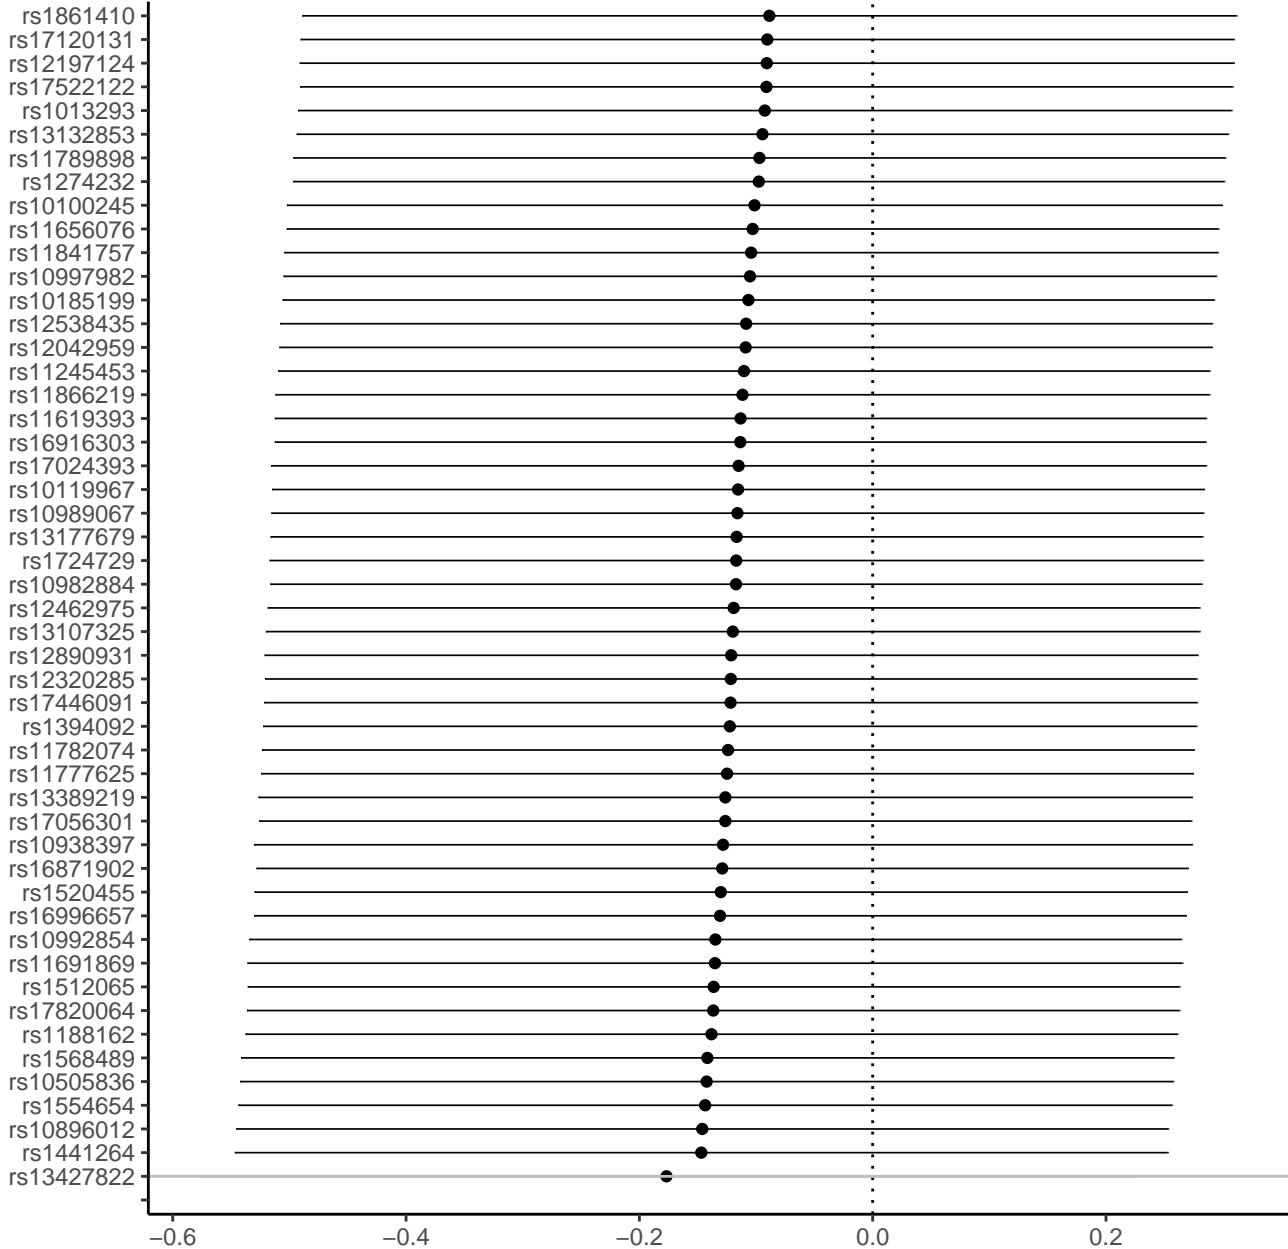

MR leave-one-out sensitivity analysis for  
'Leg fat percentage (left) || id:ukb-b-18377' on 'outcome'



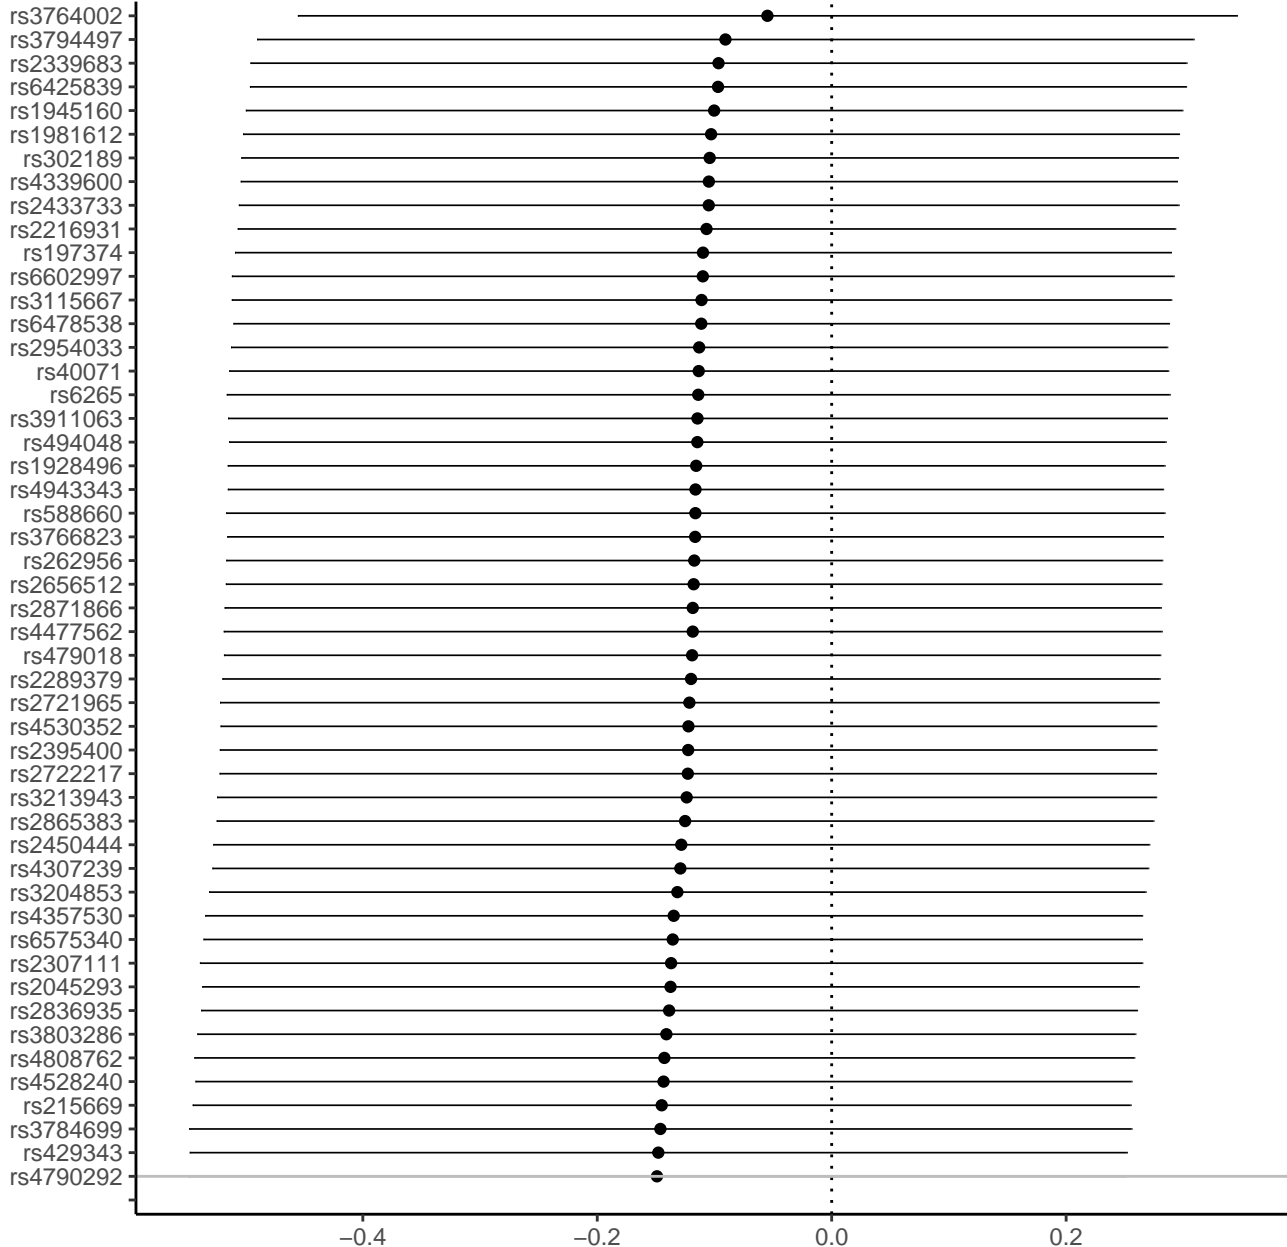

MR leave-one-out sensitivity analysis for  
'Leg fat percentage (left) || id:ukb-b-18377' on 'outcome'

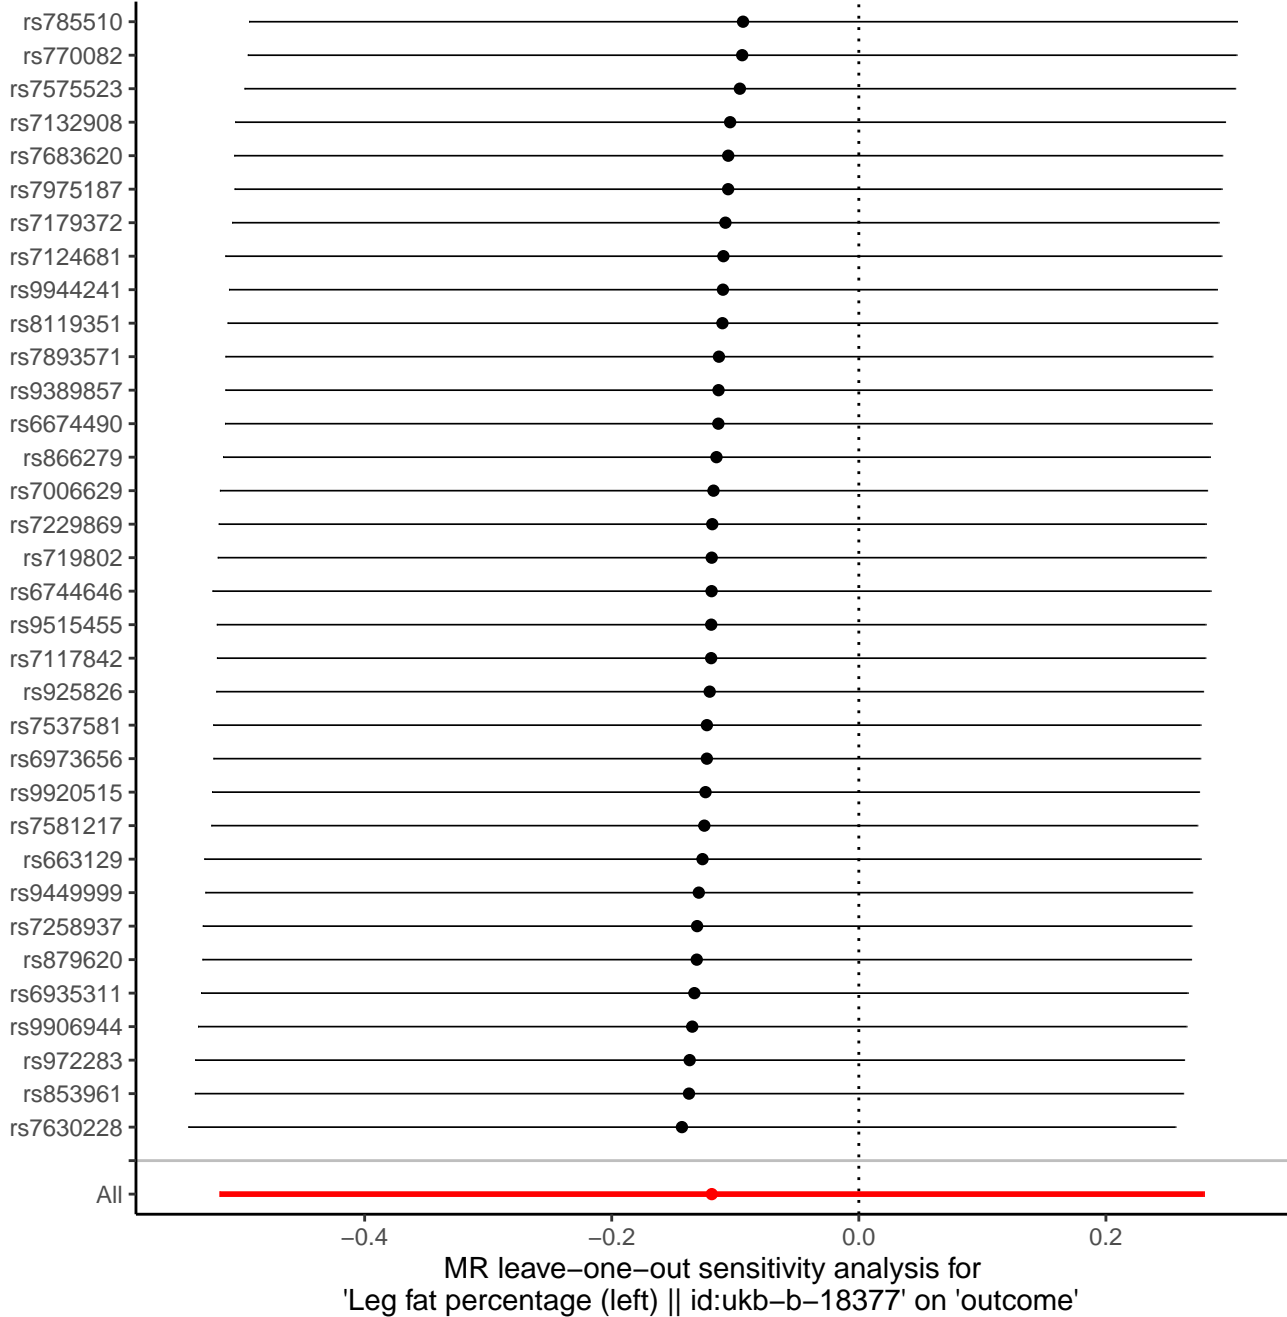

**Exposure: Leg Fat Percent - Right, Outcome: Corrected Insulin Response adjusted for ISI**  
**Figures of Forest Plot, Comparison of Different MR Methods, Funnel Plot and Leave-one-out Sensitivity Analysis**

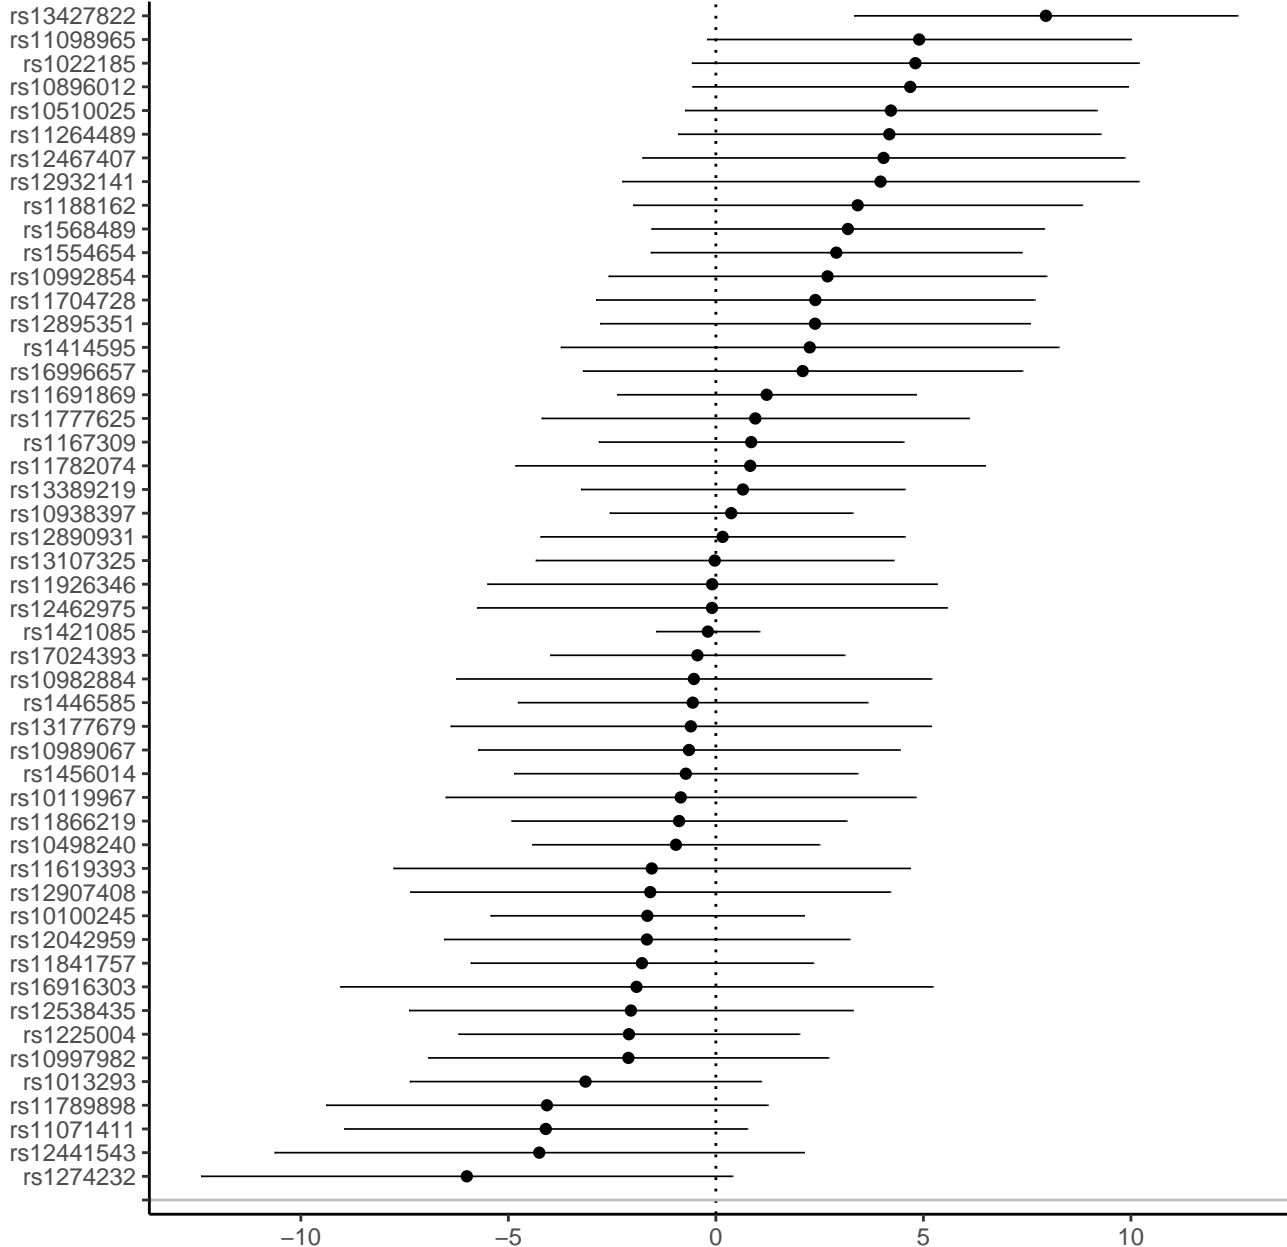

MR effect size for  
'Leg fat percentage (right) || id:ukb-b-20531' on 'outcome'

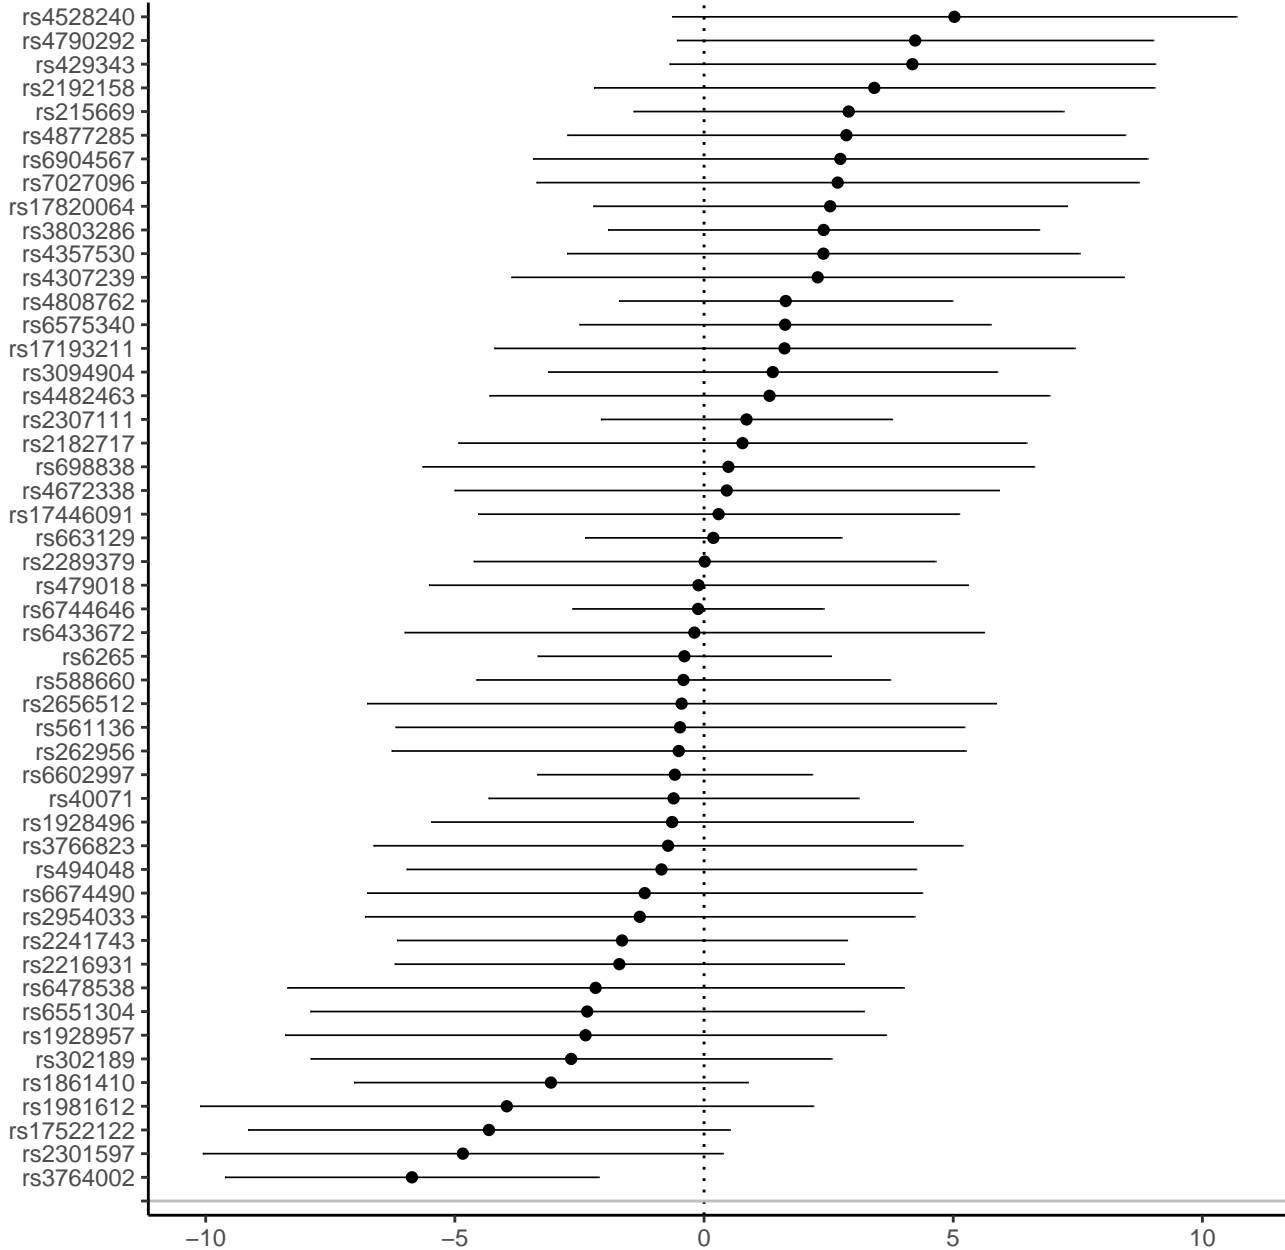

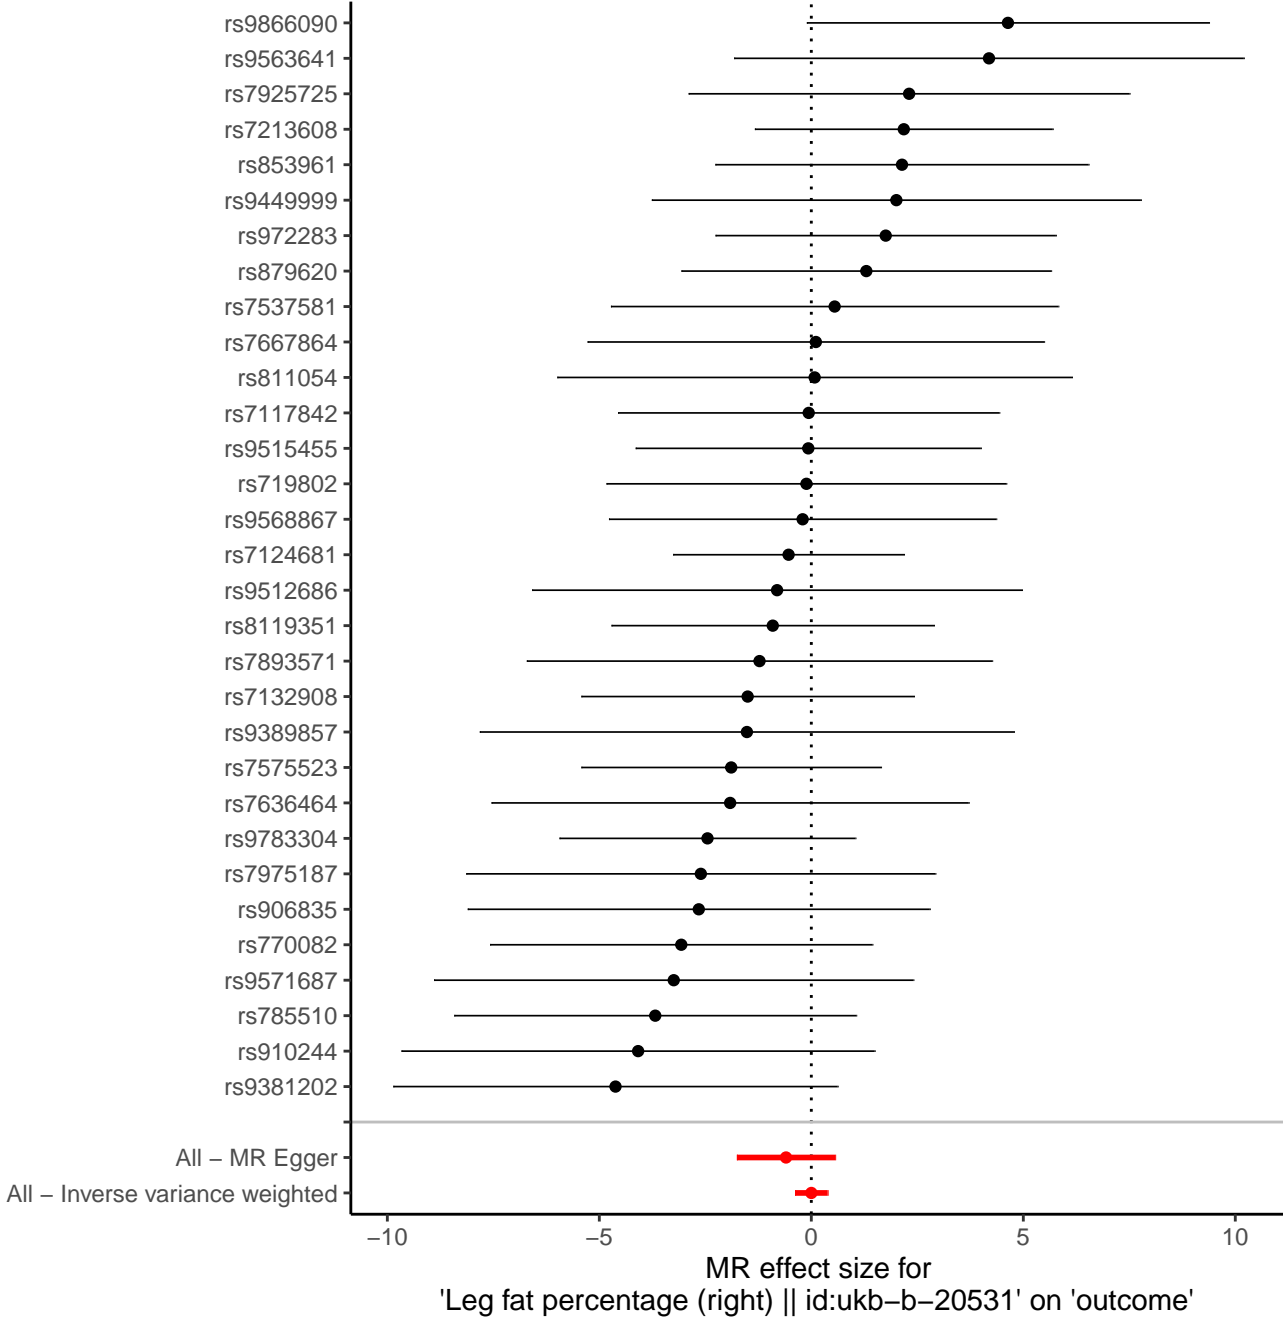

MR Test

- Inverse variance weighted
- MR Egger
- Simple mode
- Weighted median
- Weighted mode

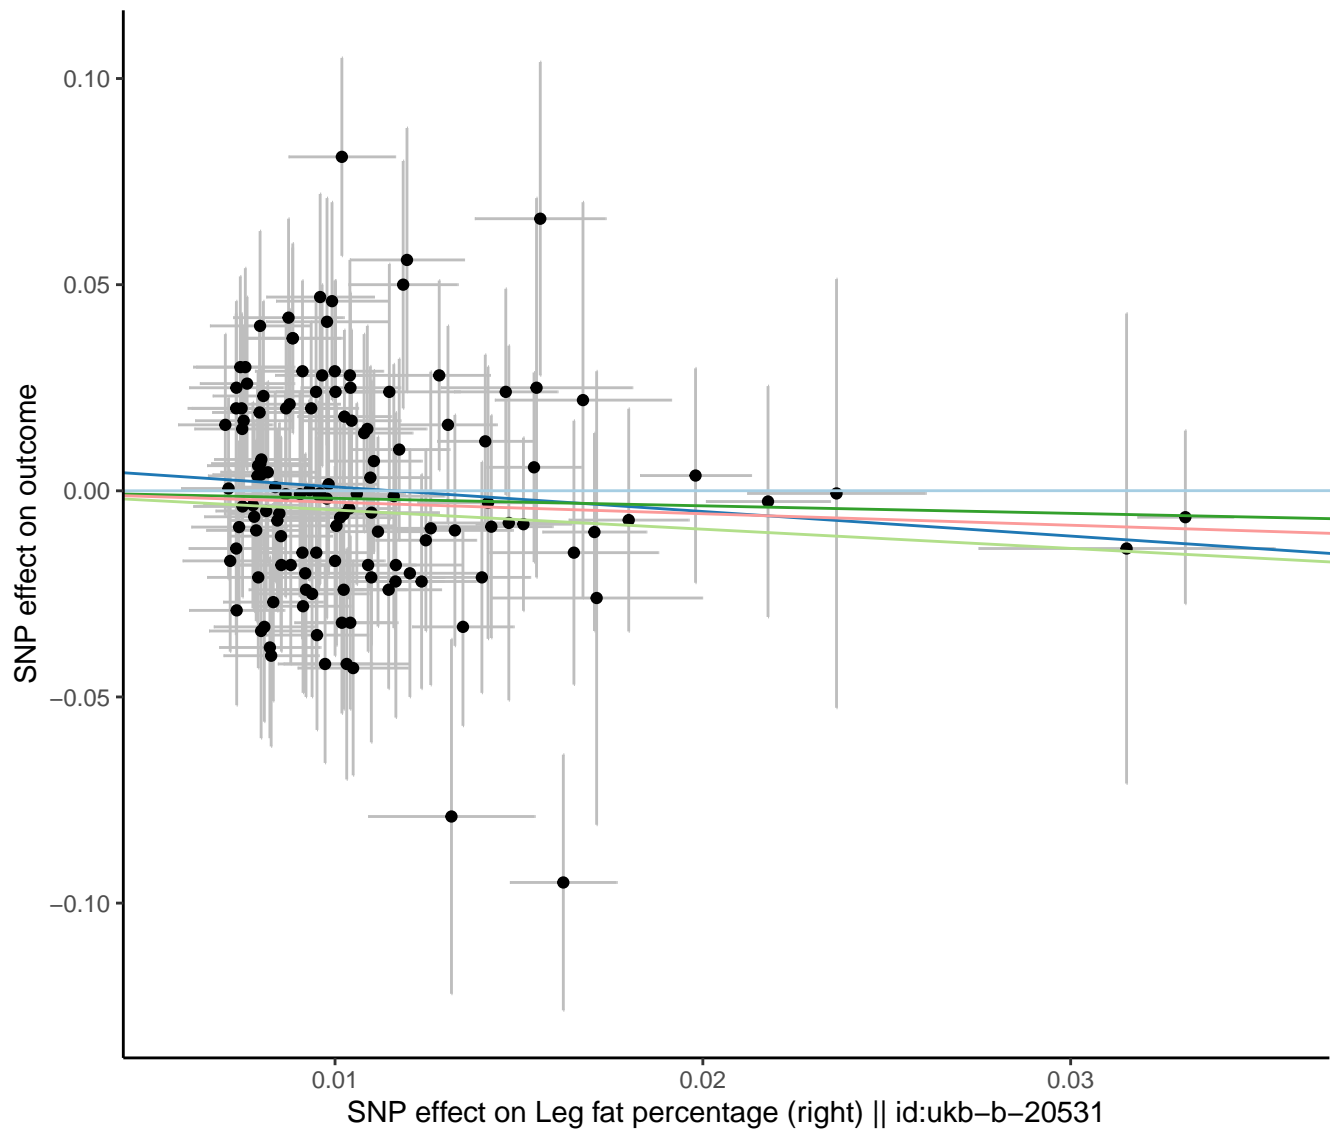

MR Method

Inverse variance weighted

MR Egger

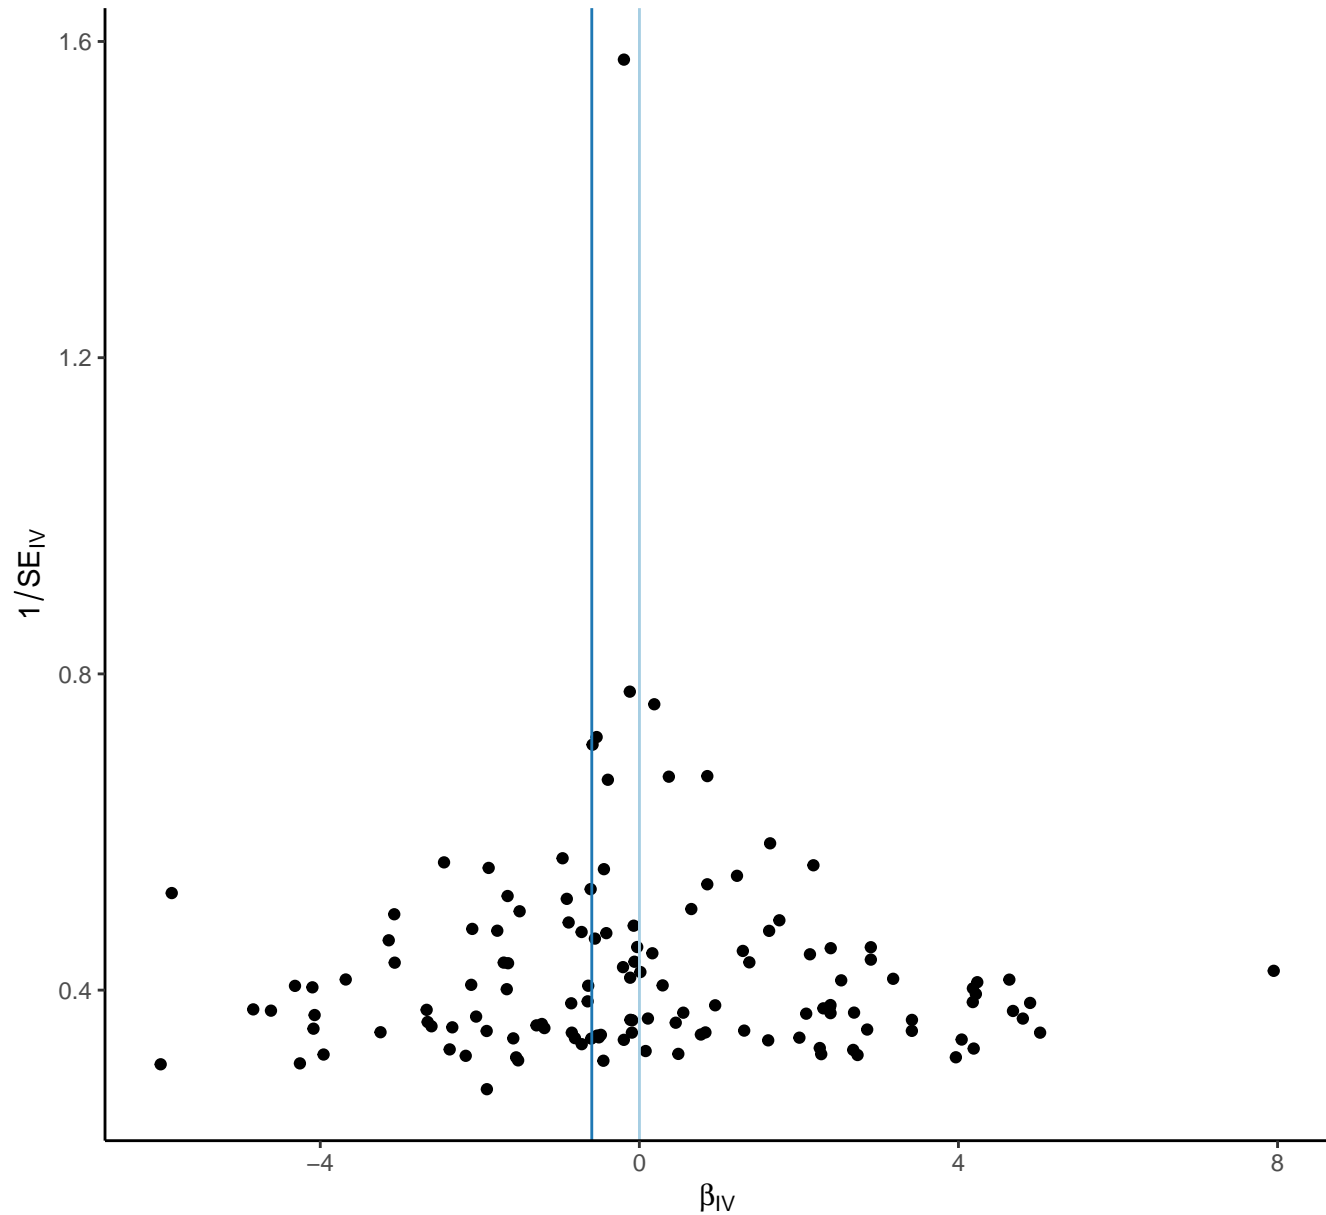



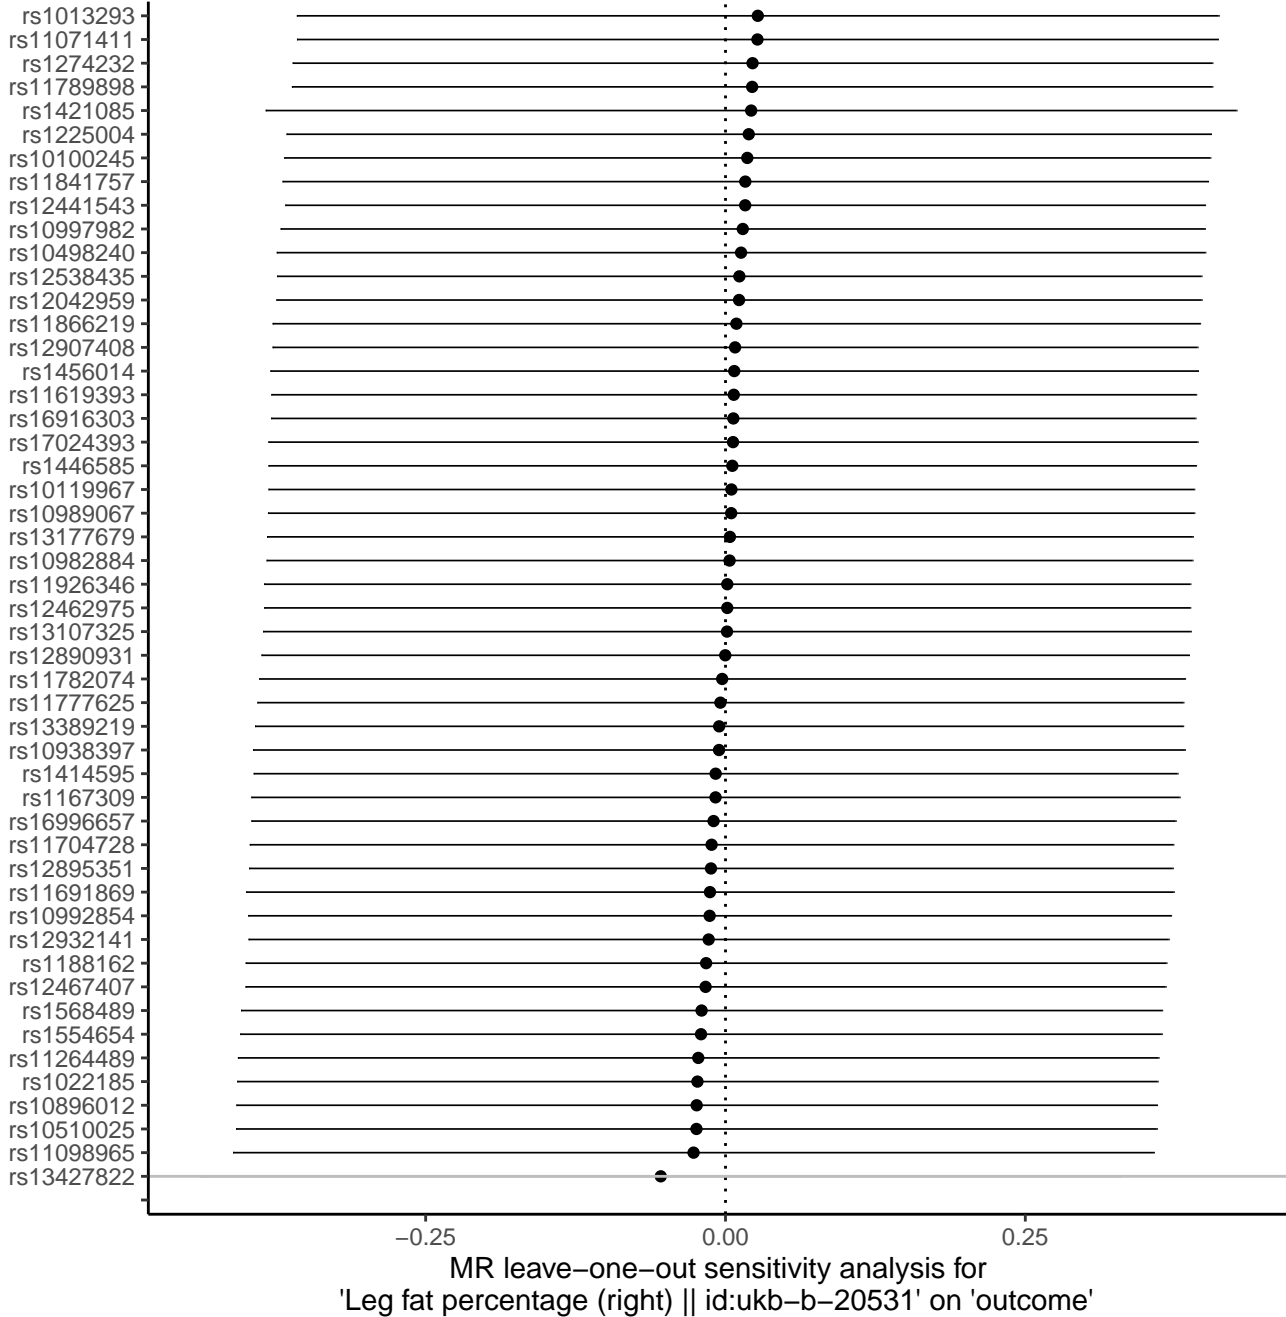

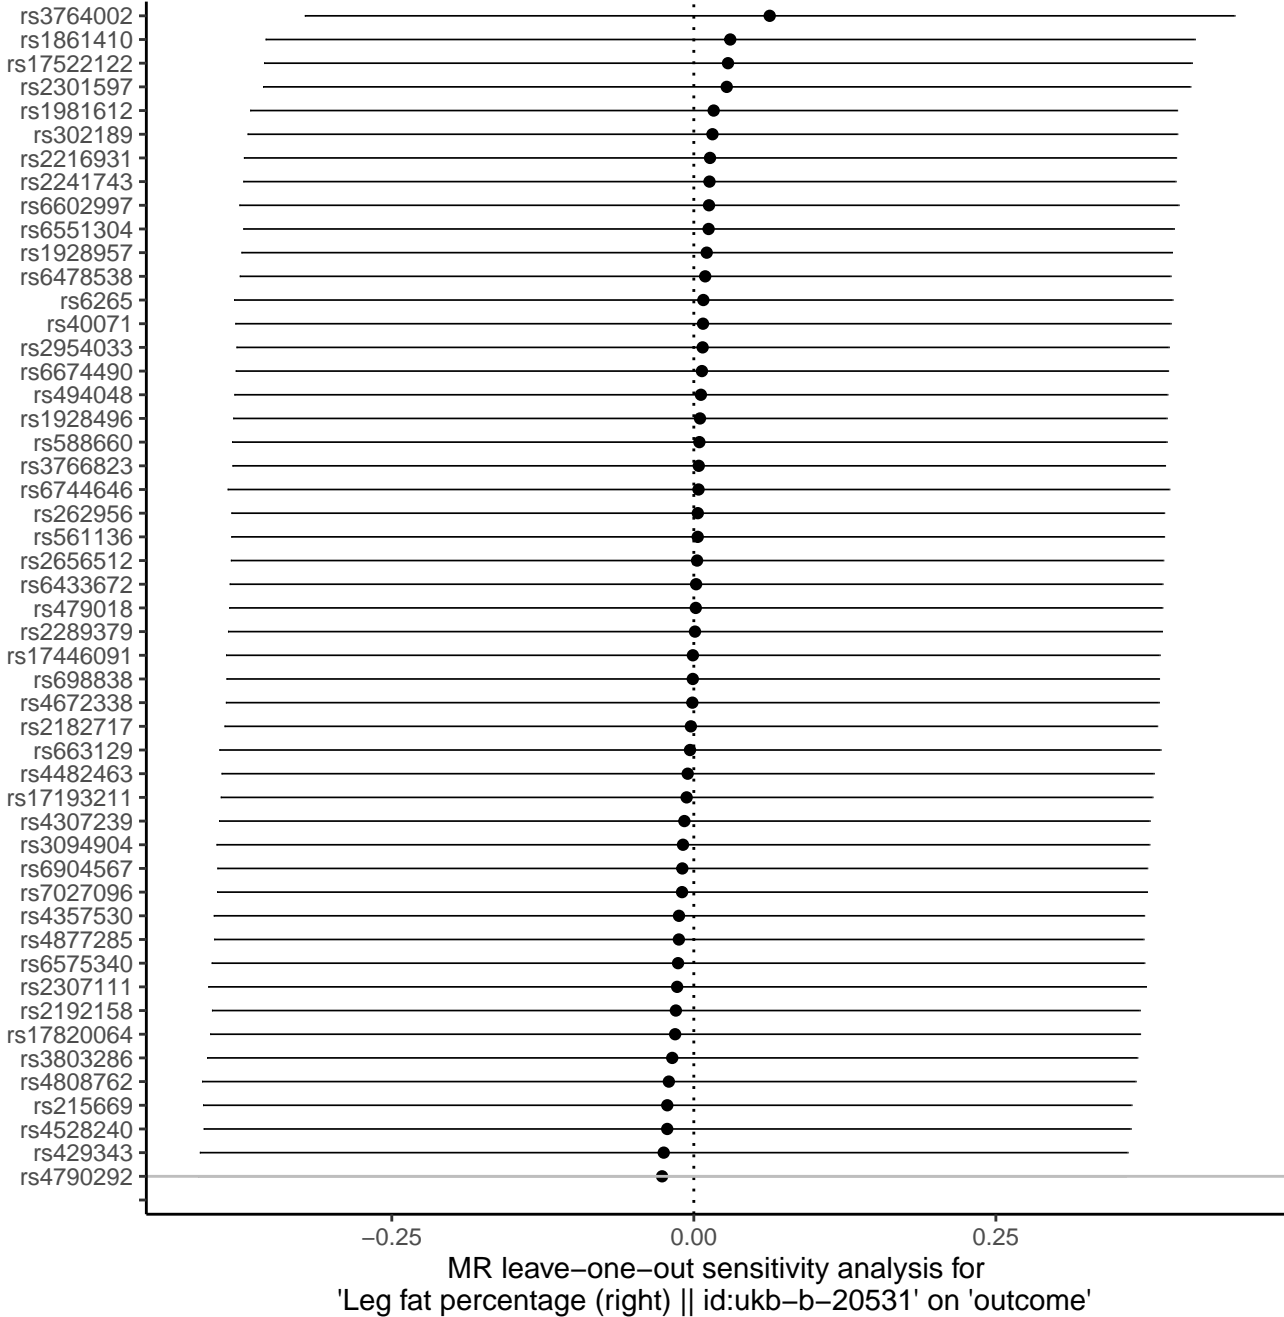

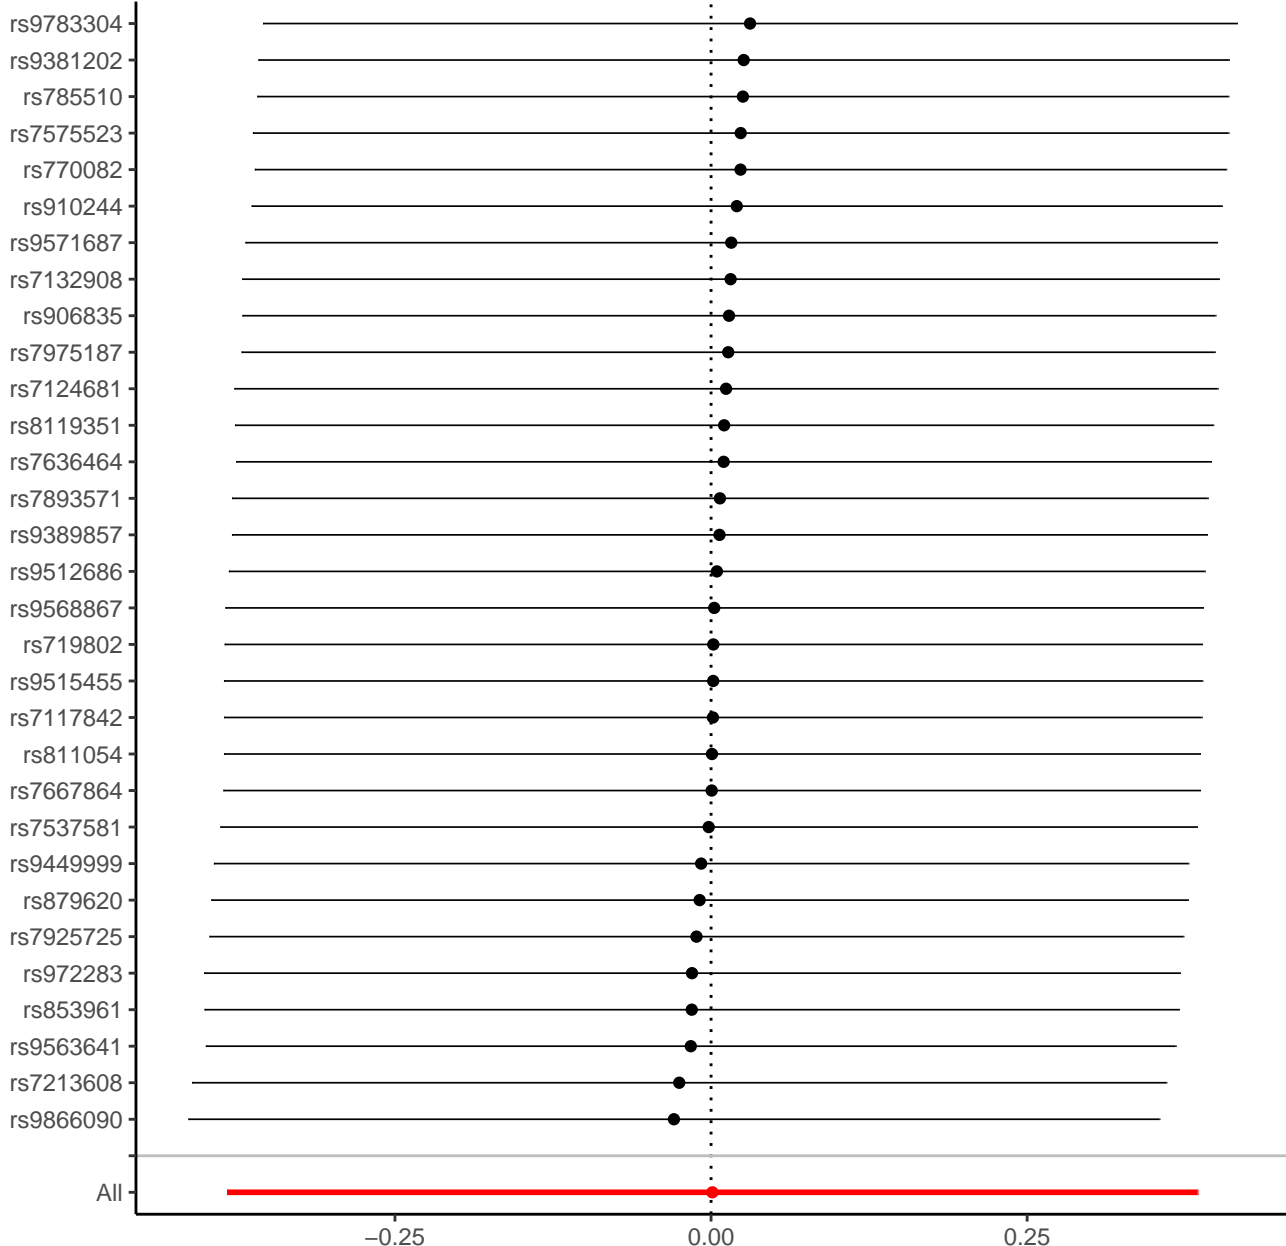

MR leave-one-out sensitivity analysis for  
'Leg fat percentage (right) || id:ukb-b-20531' on 'outcome'

**Exposure: Liver Fat, Outcome: Corrected Insulin Response adjusted for ISI**  
**Figures of Forest Plot, Comparison of Different MR Methods, Funnel Plot and Leave-one-out Sensitivity Analysis**

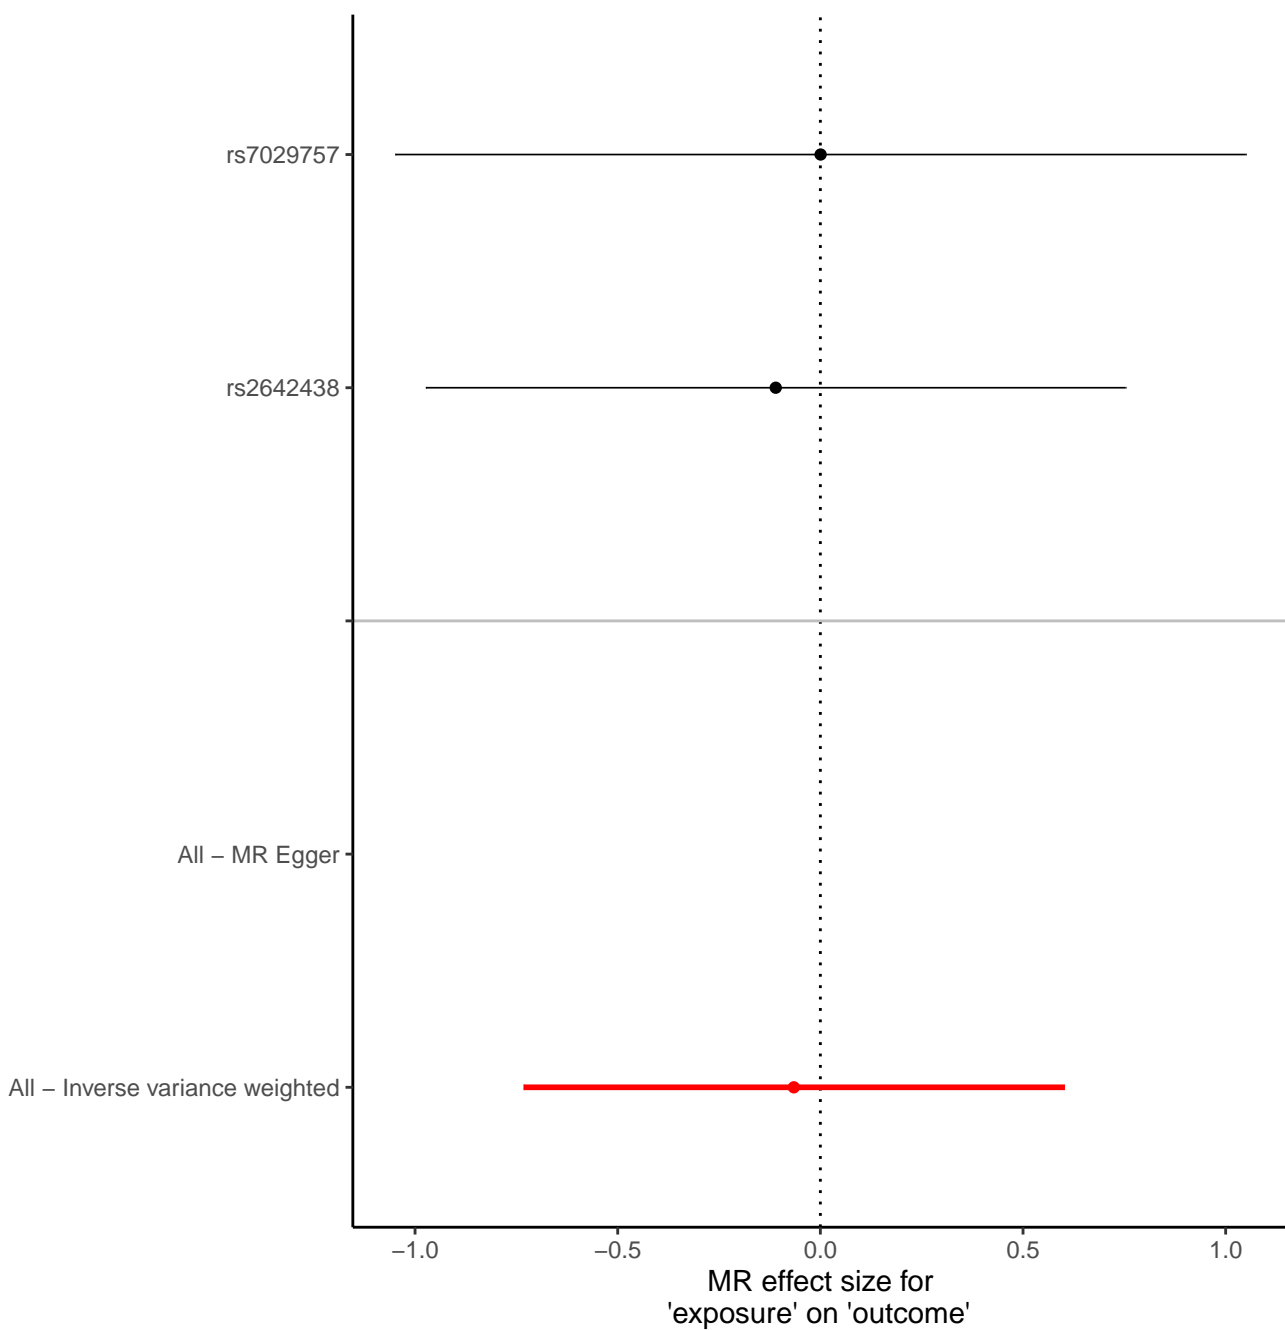

MR Test

Inverse variance weighted

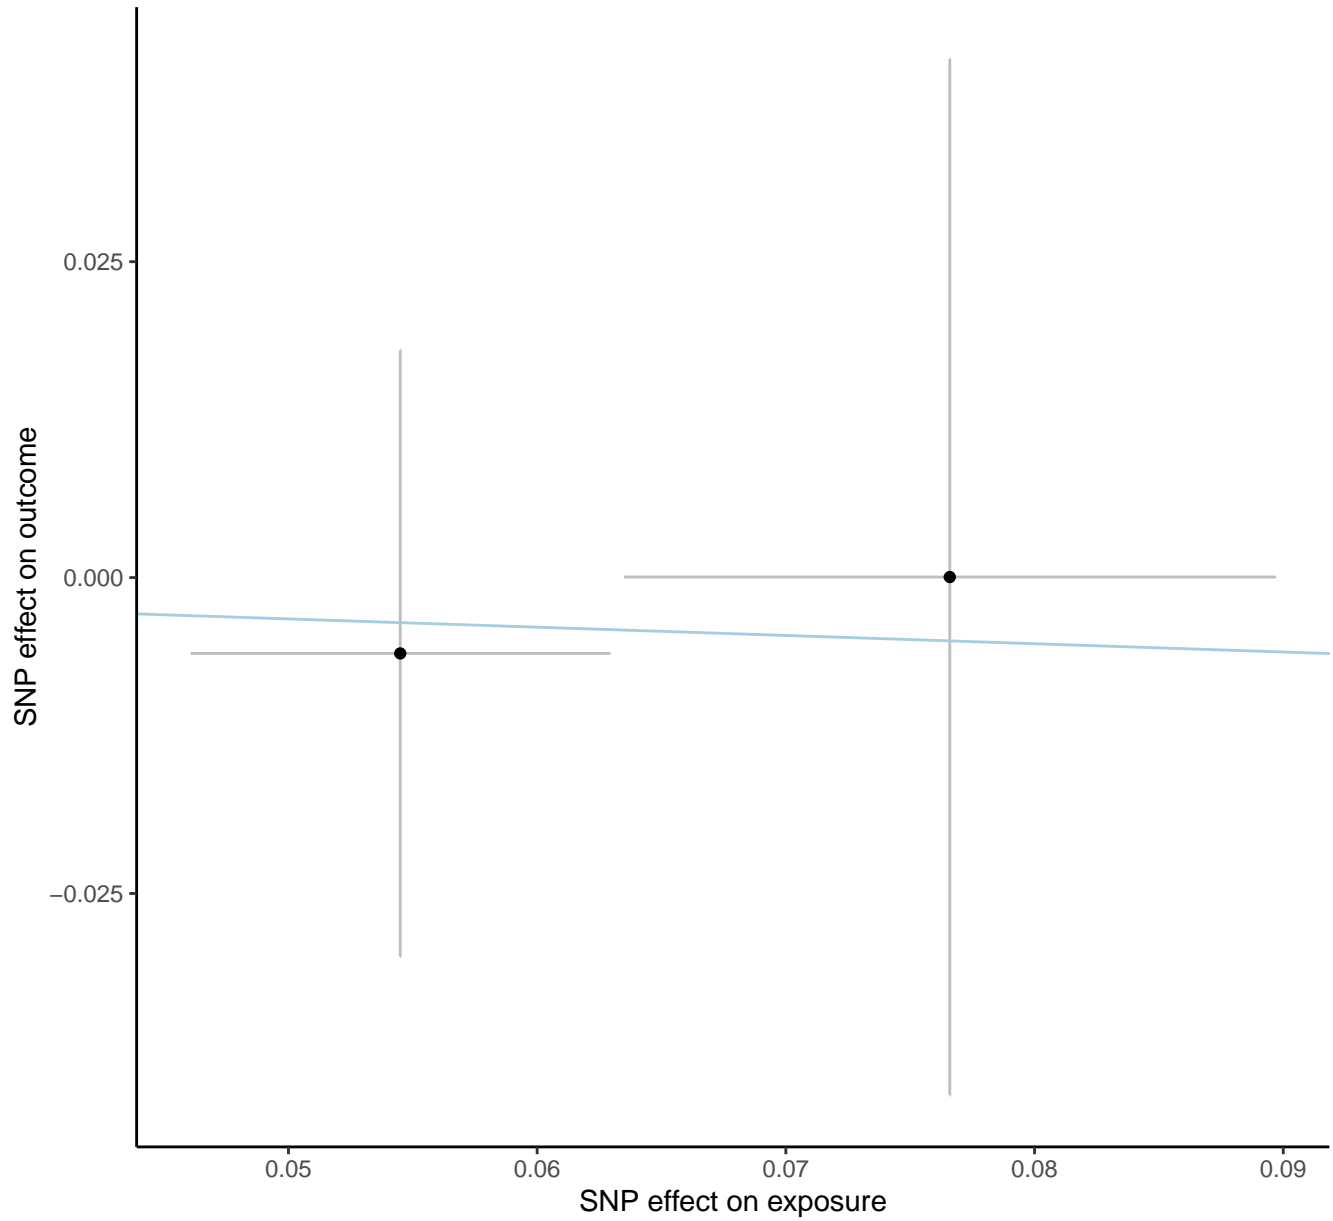

MR Method

Inverse variance weighted

MR Egger

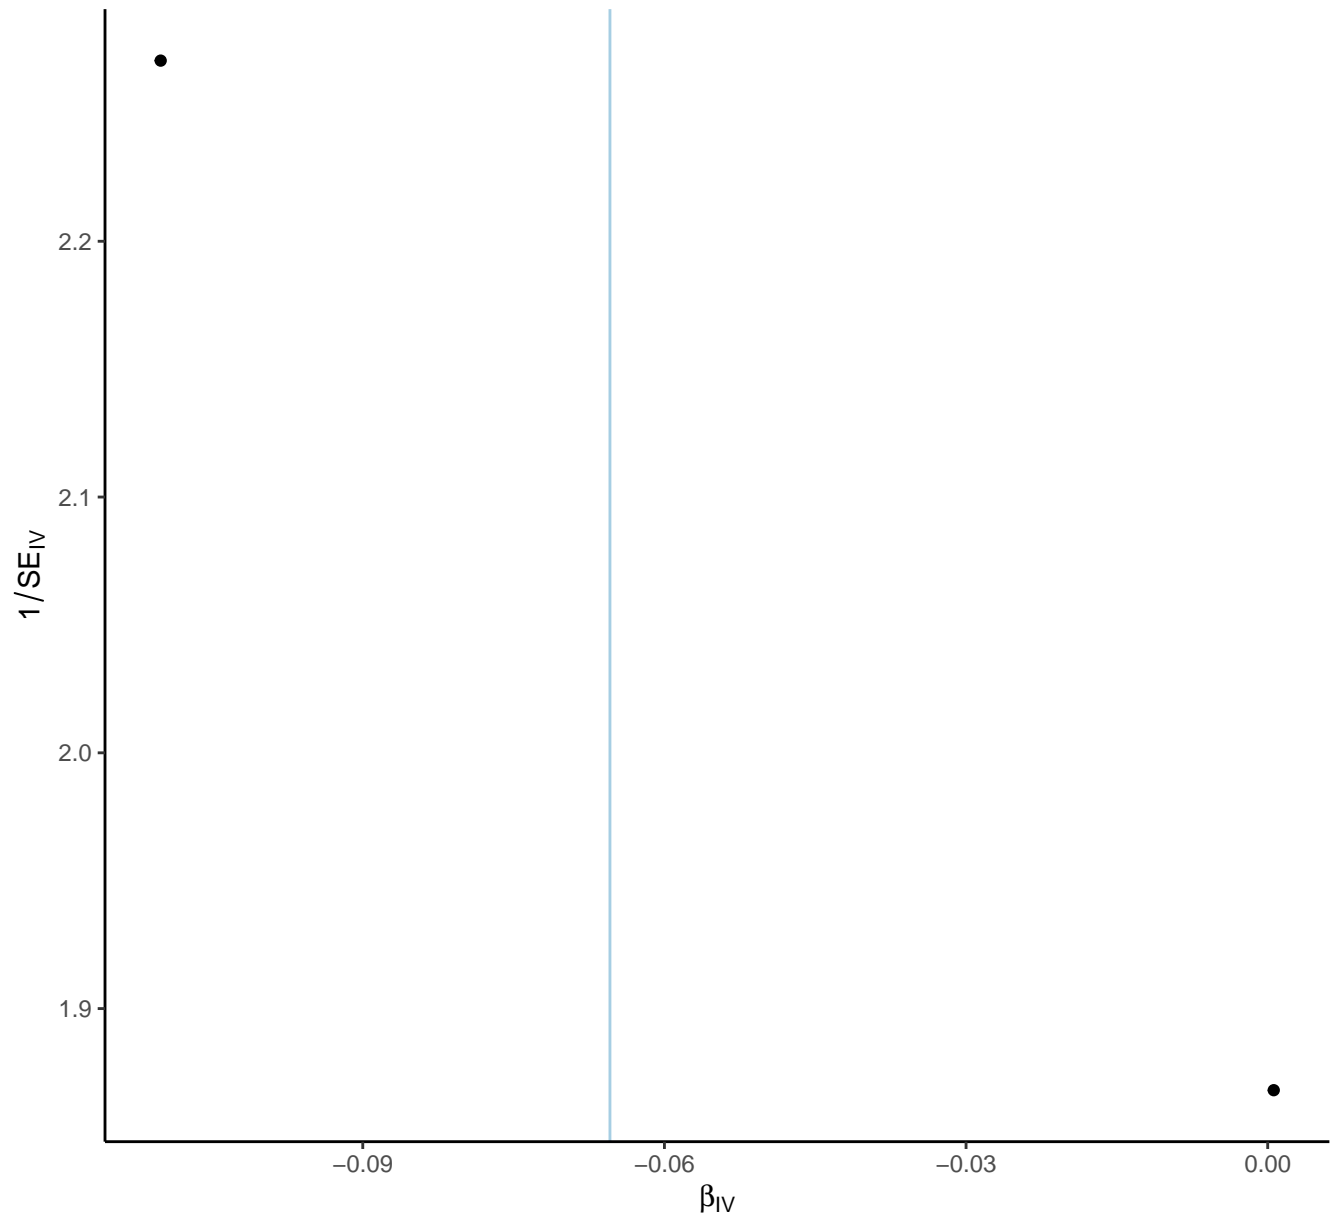

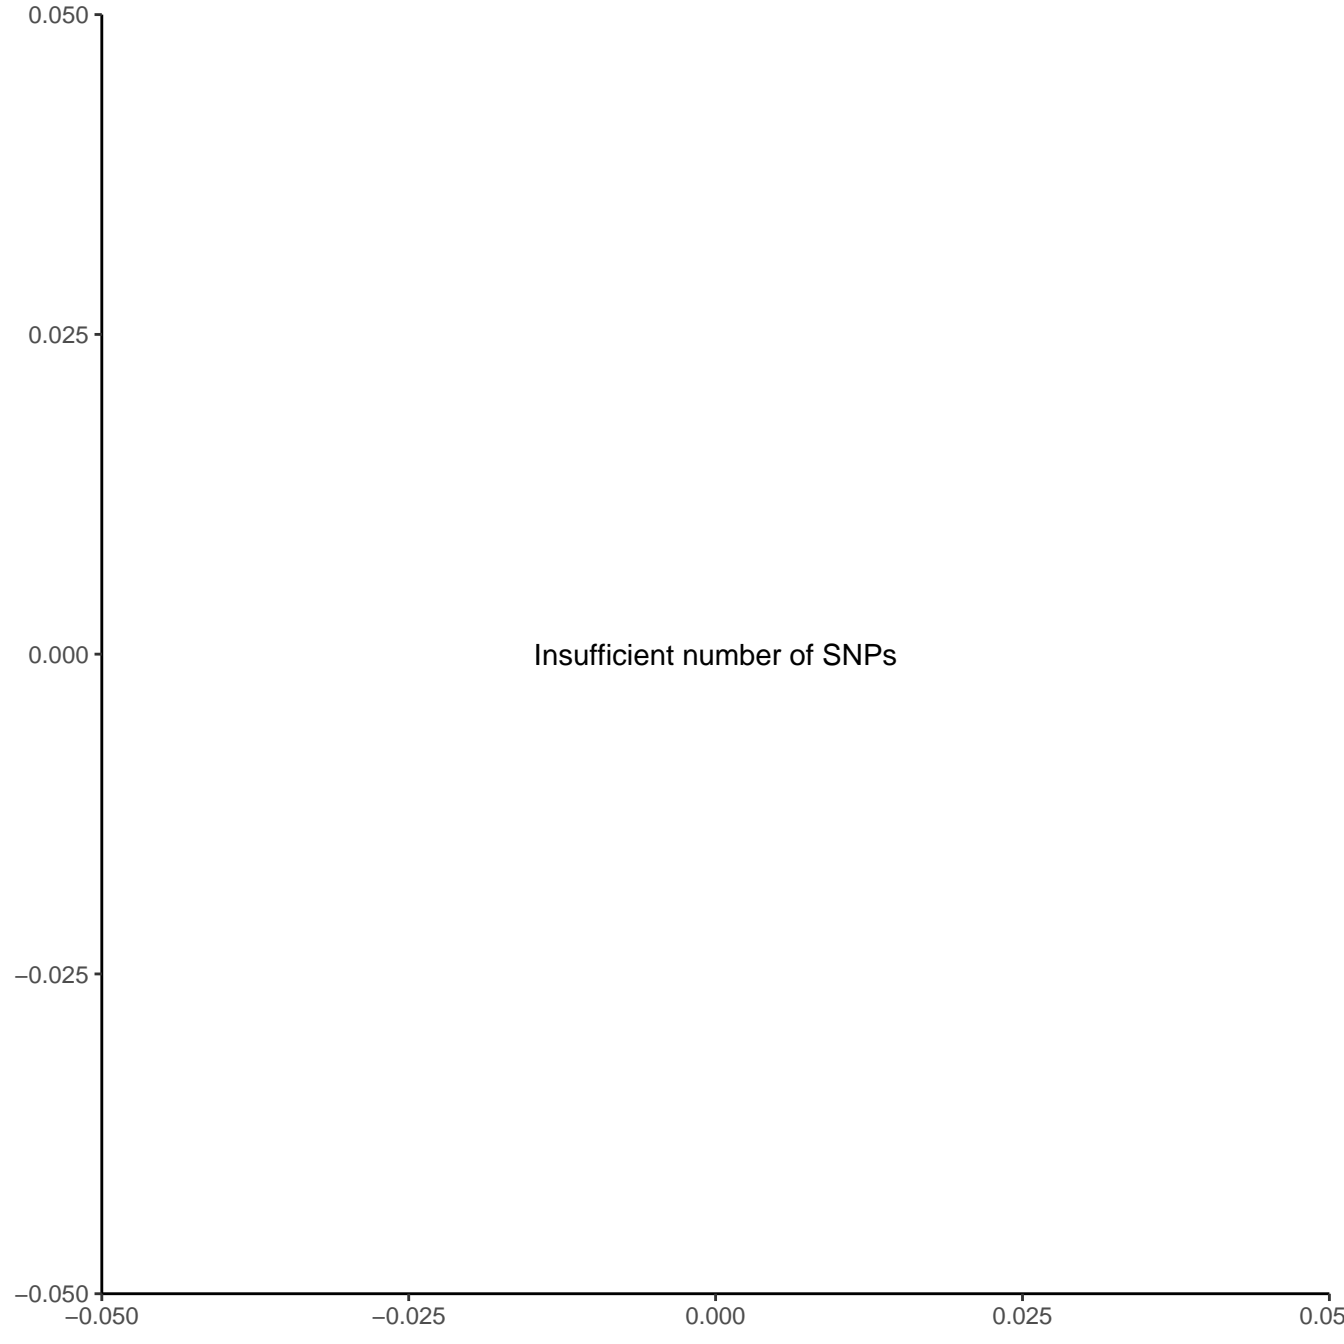



**Exposure: Type 2 Diabetes, Outcome: Corrected Insulin Response adjusted for ISI**  
**Figures of Forest Plot, Comparison of Different MR Methods, Funnel Plot and Leave-one-out Sensitivity Analysis**

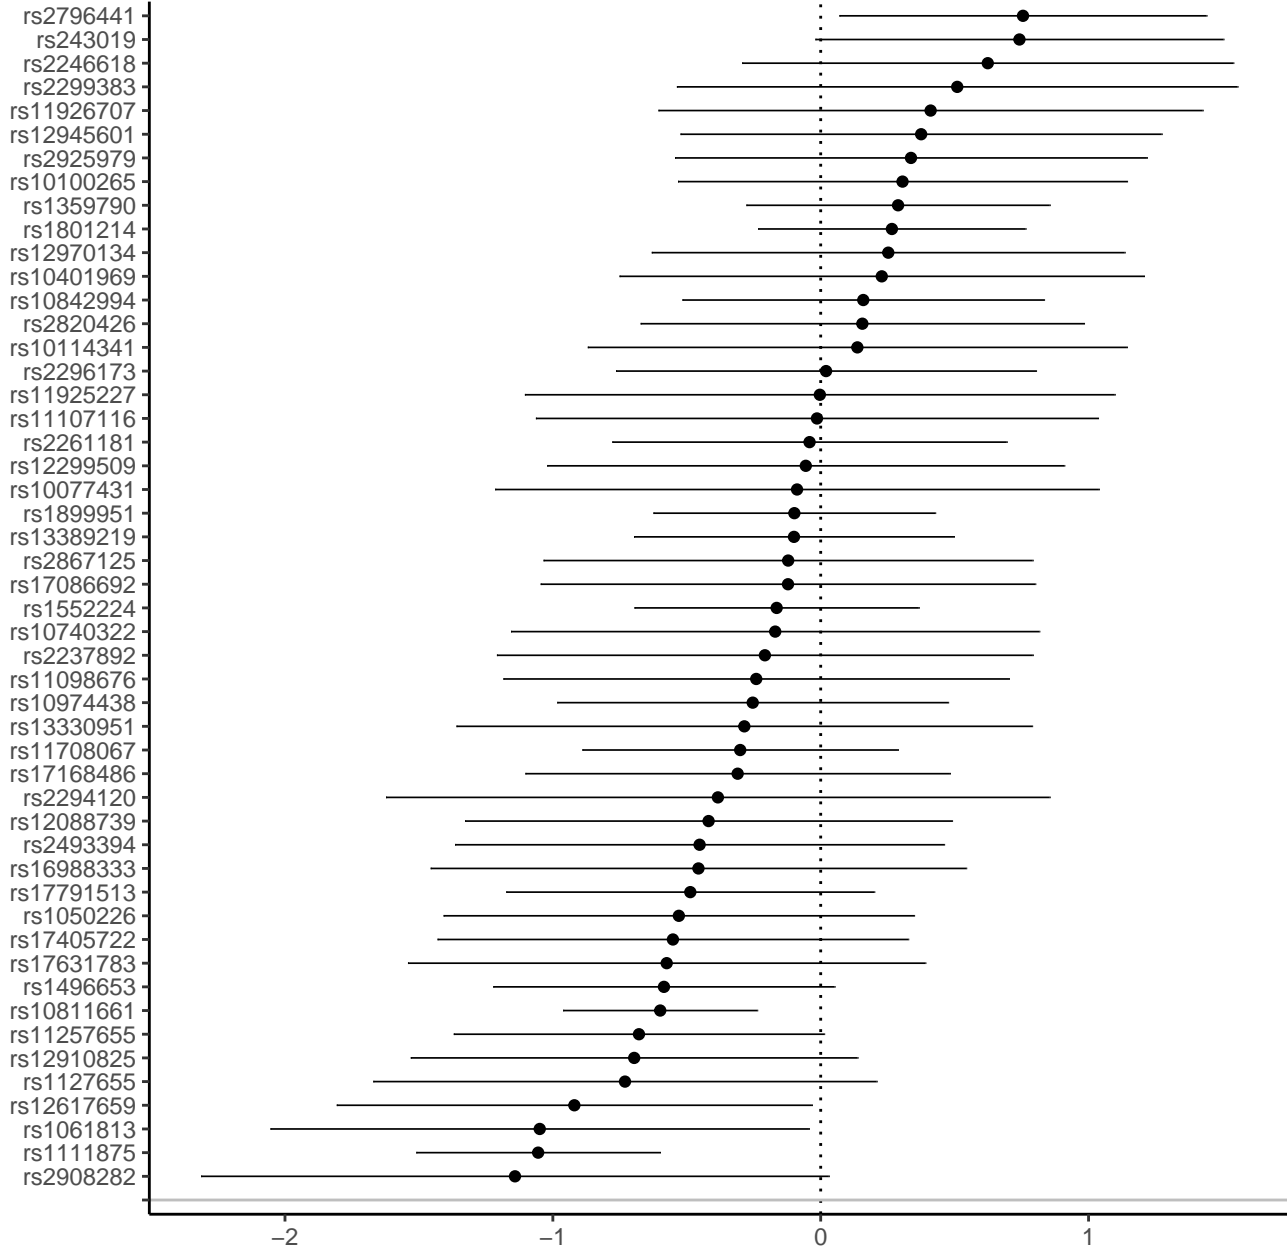

MR effect size for  
'Type 2 diabetes || id:ebi-a-GCST006867' on 'outcome'

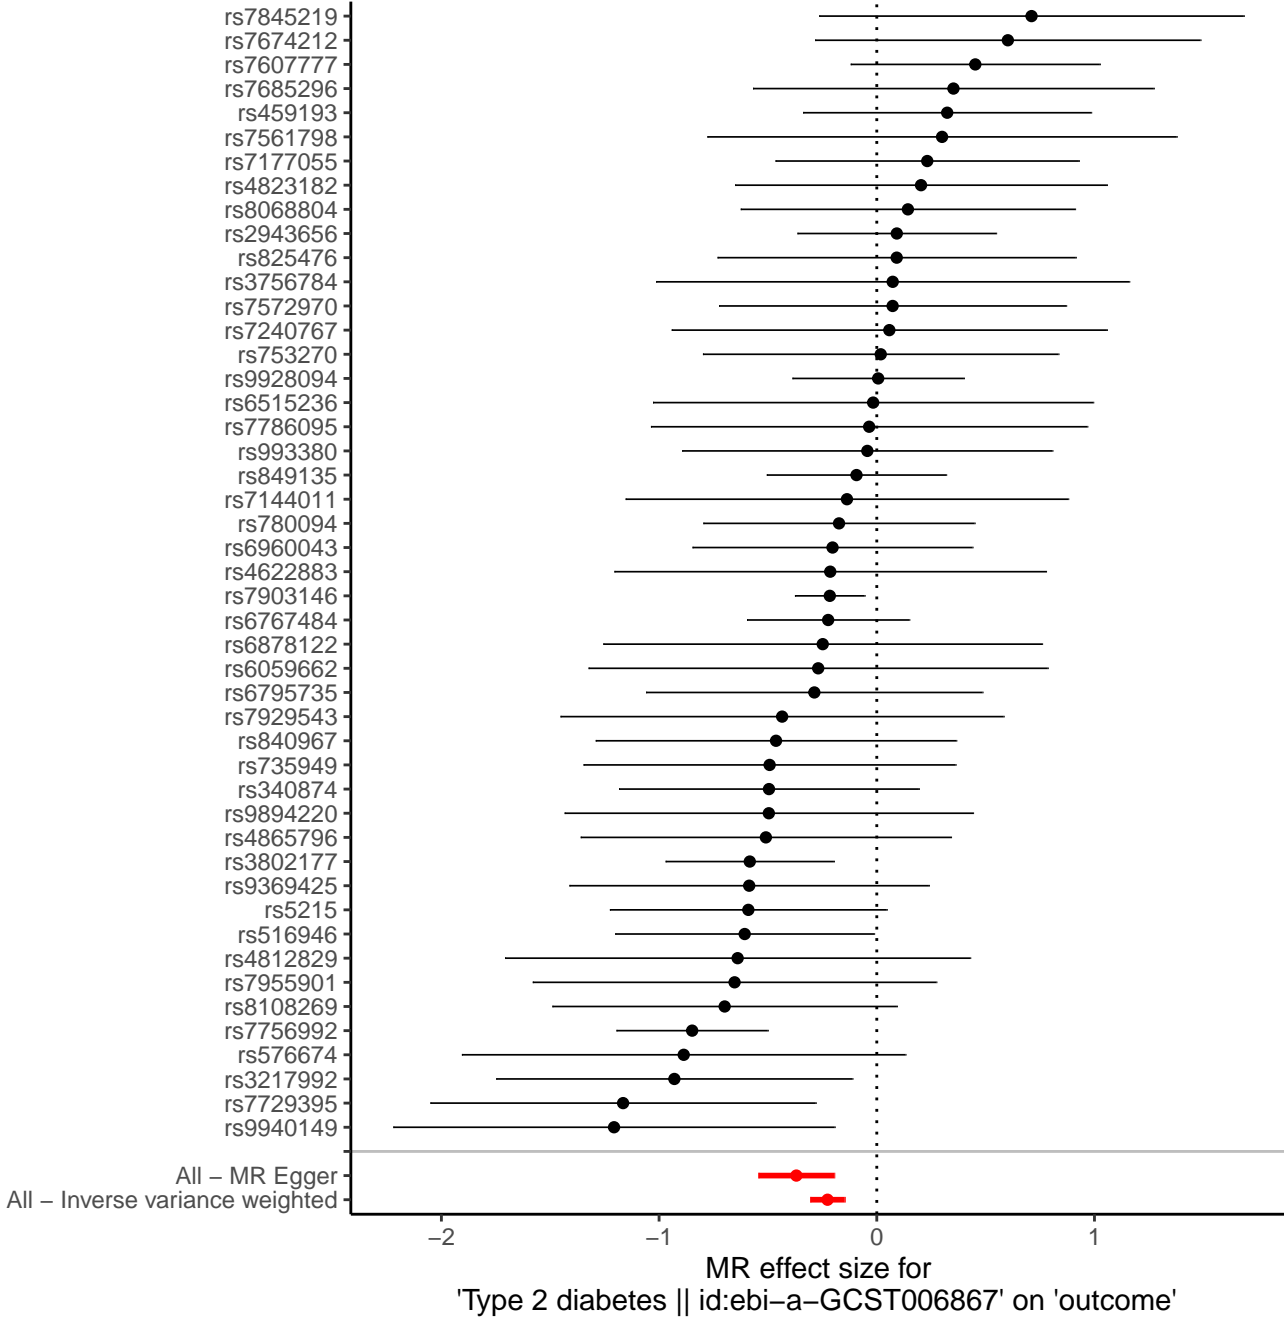

MR Test

- Inverse variance weighted
- MR Egger
- Simple mode
- Weighted median
- Weighted mode

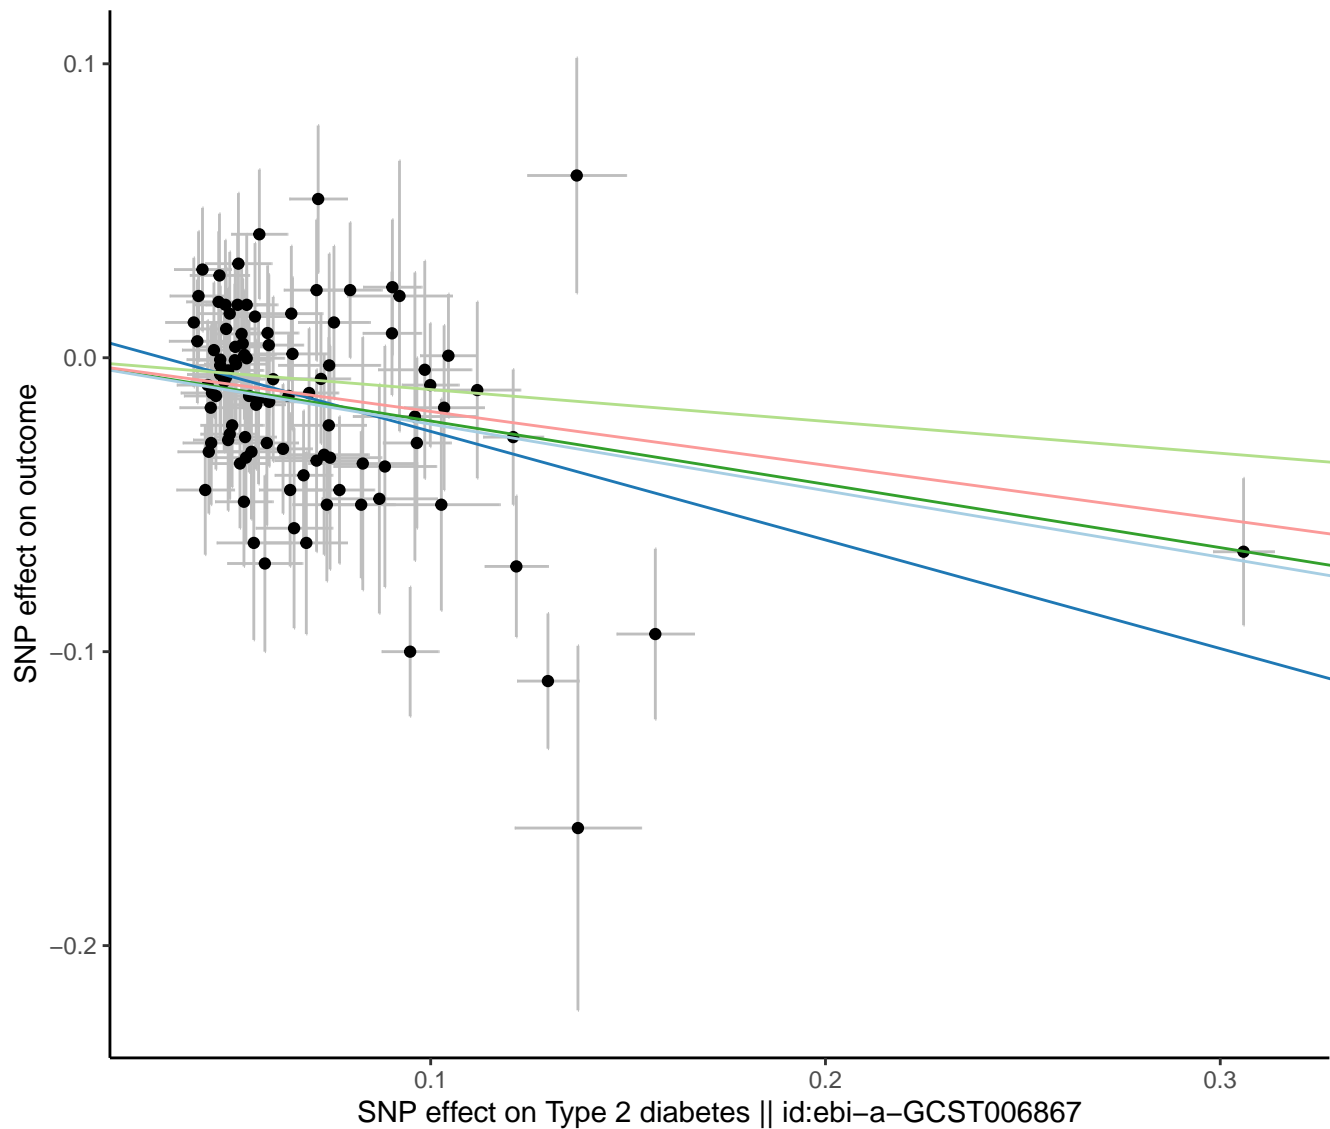

MR Method

Inverse variance weighted

MR Egger

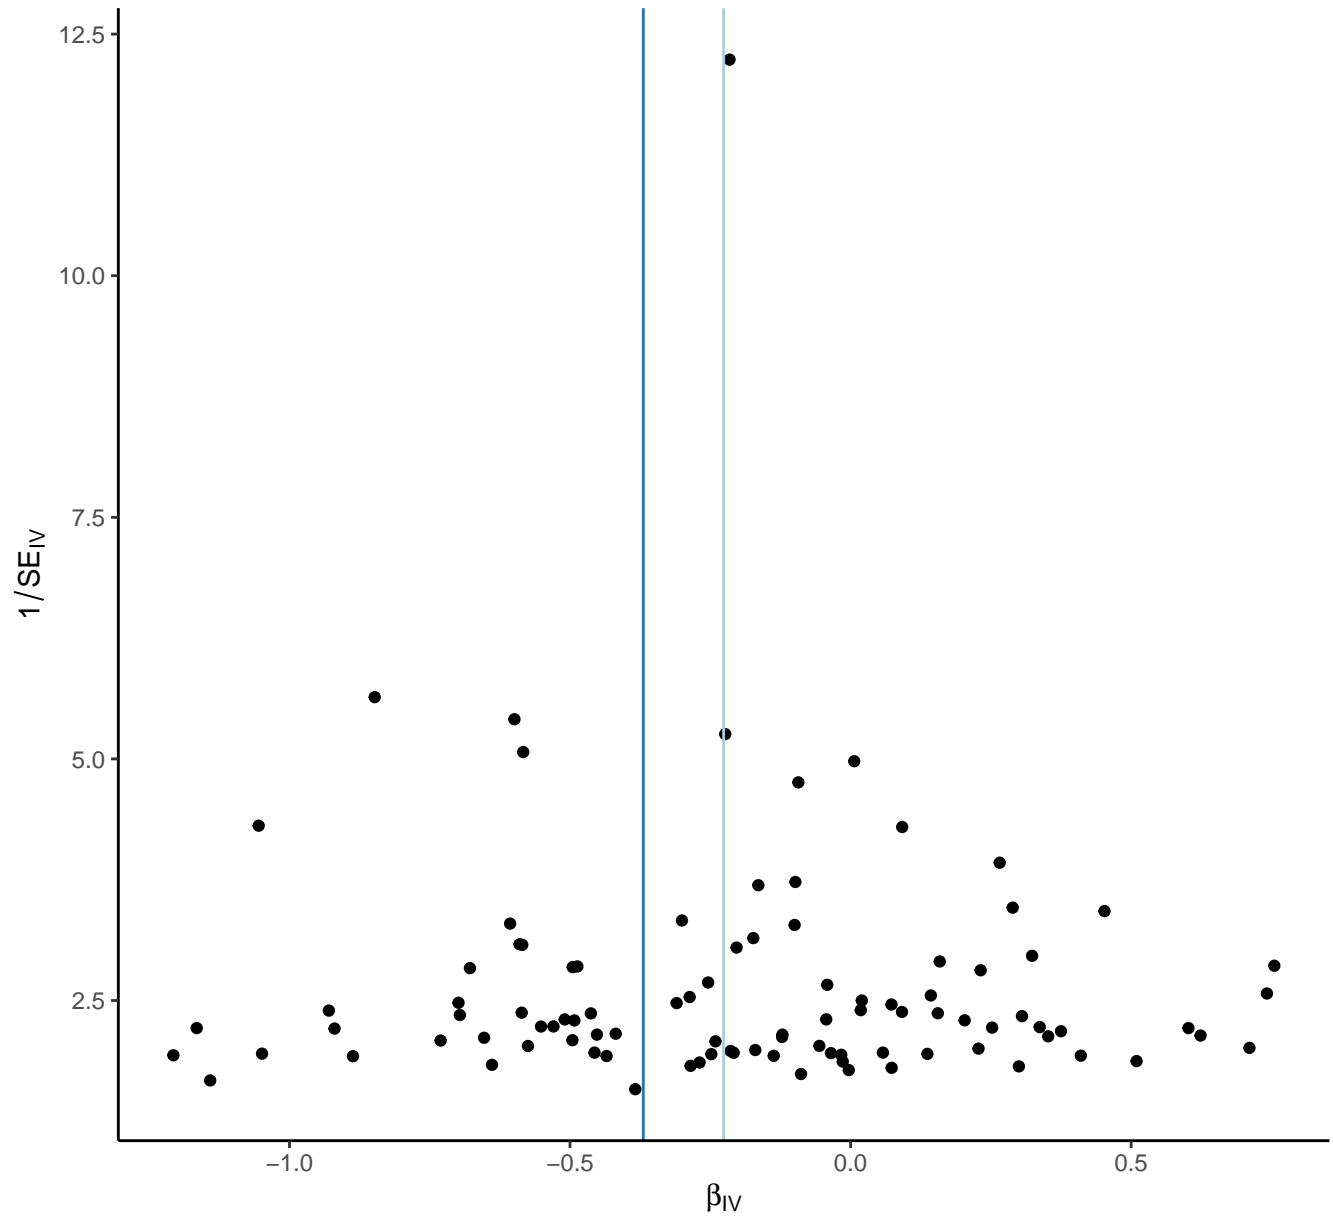

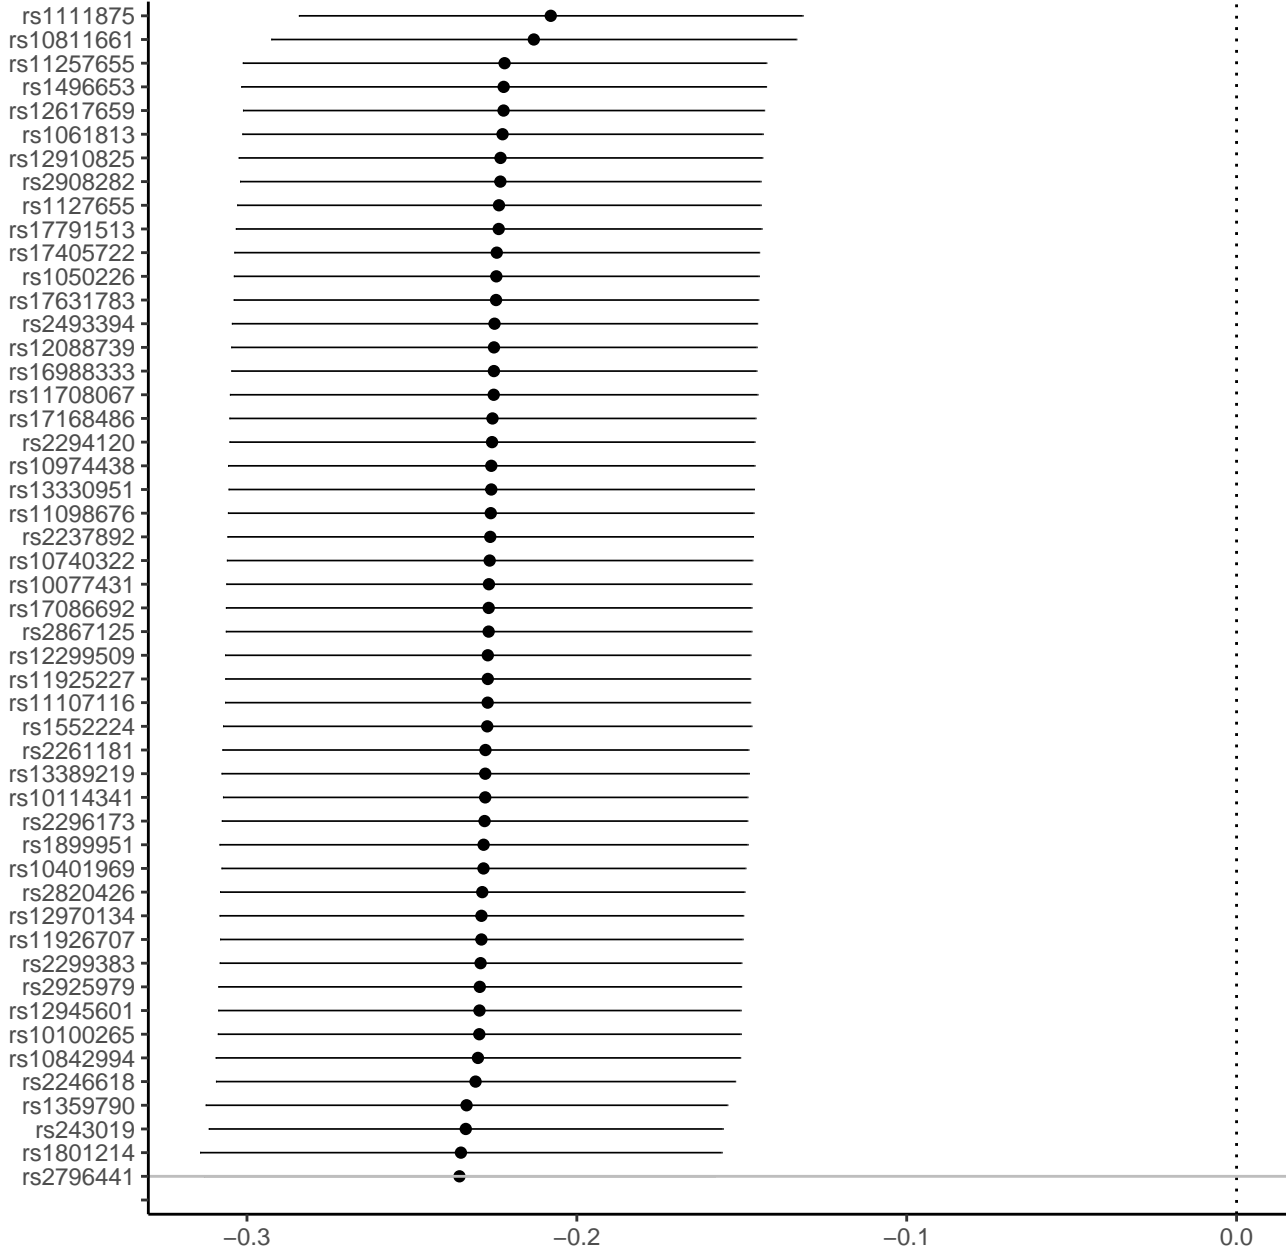

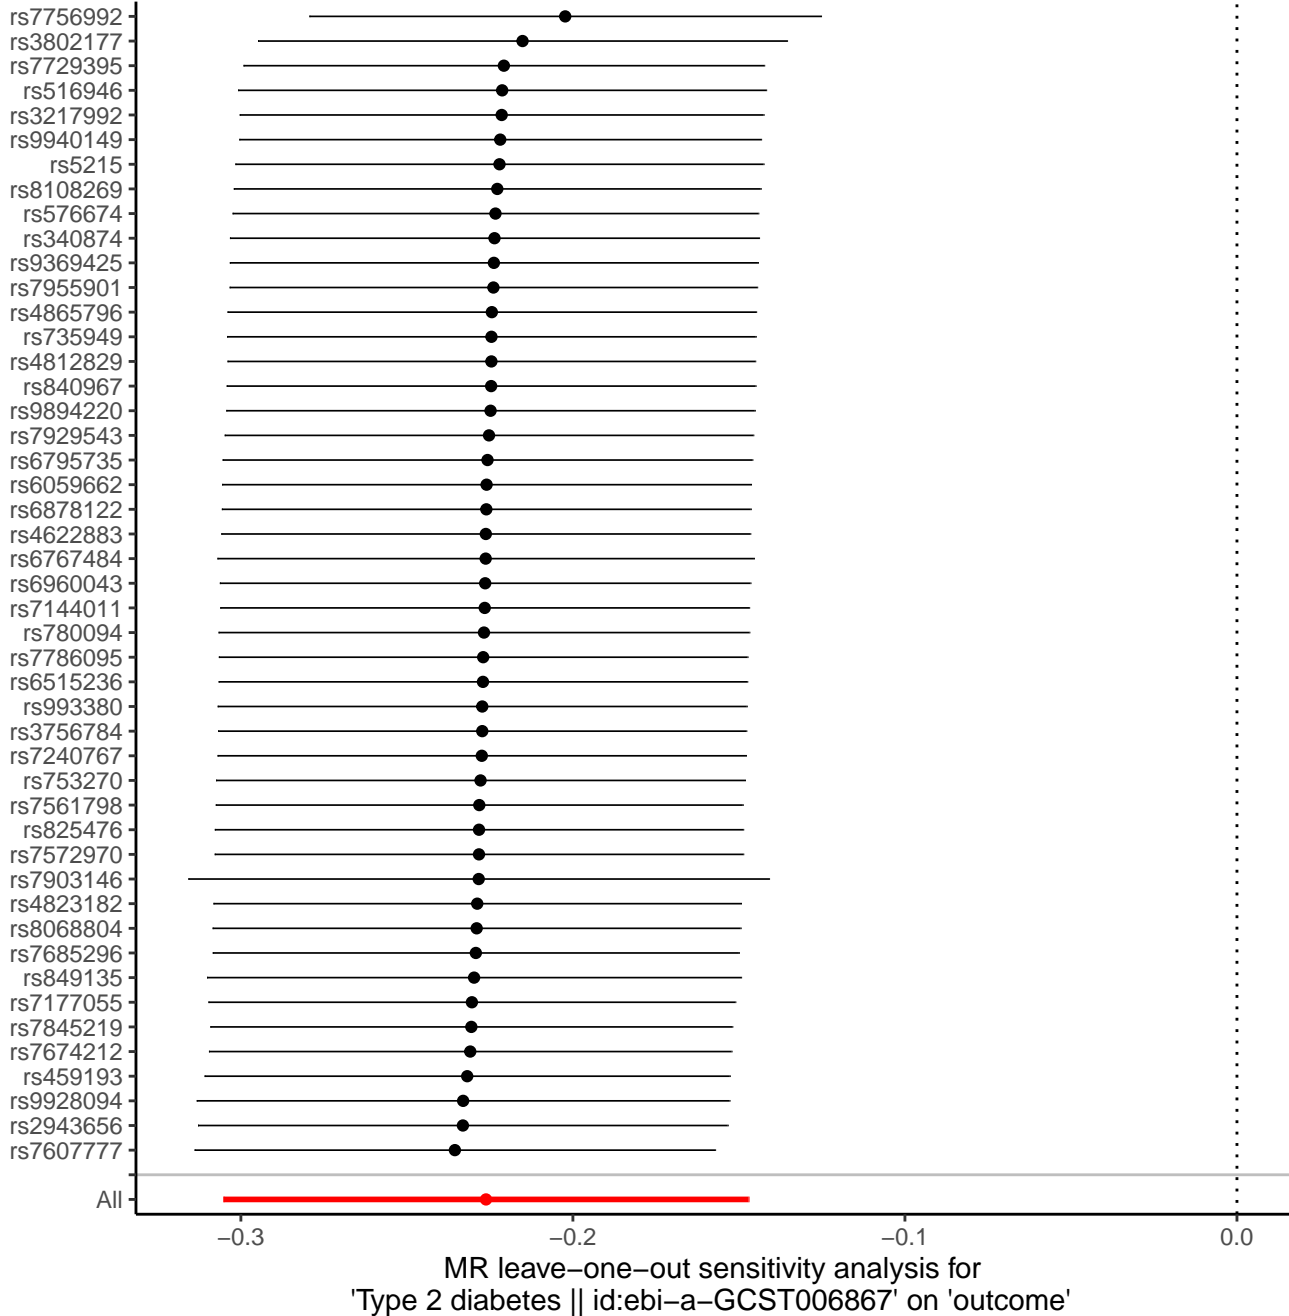

**Exposure: Triglycerides, Outcome: Corrected Insulin Response adjusted for ISI**  
**Figures of Forest Plot, Comparison of Different MR Methods, Funnel Plot and Leave-one-out Sensitivity Analysis**



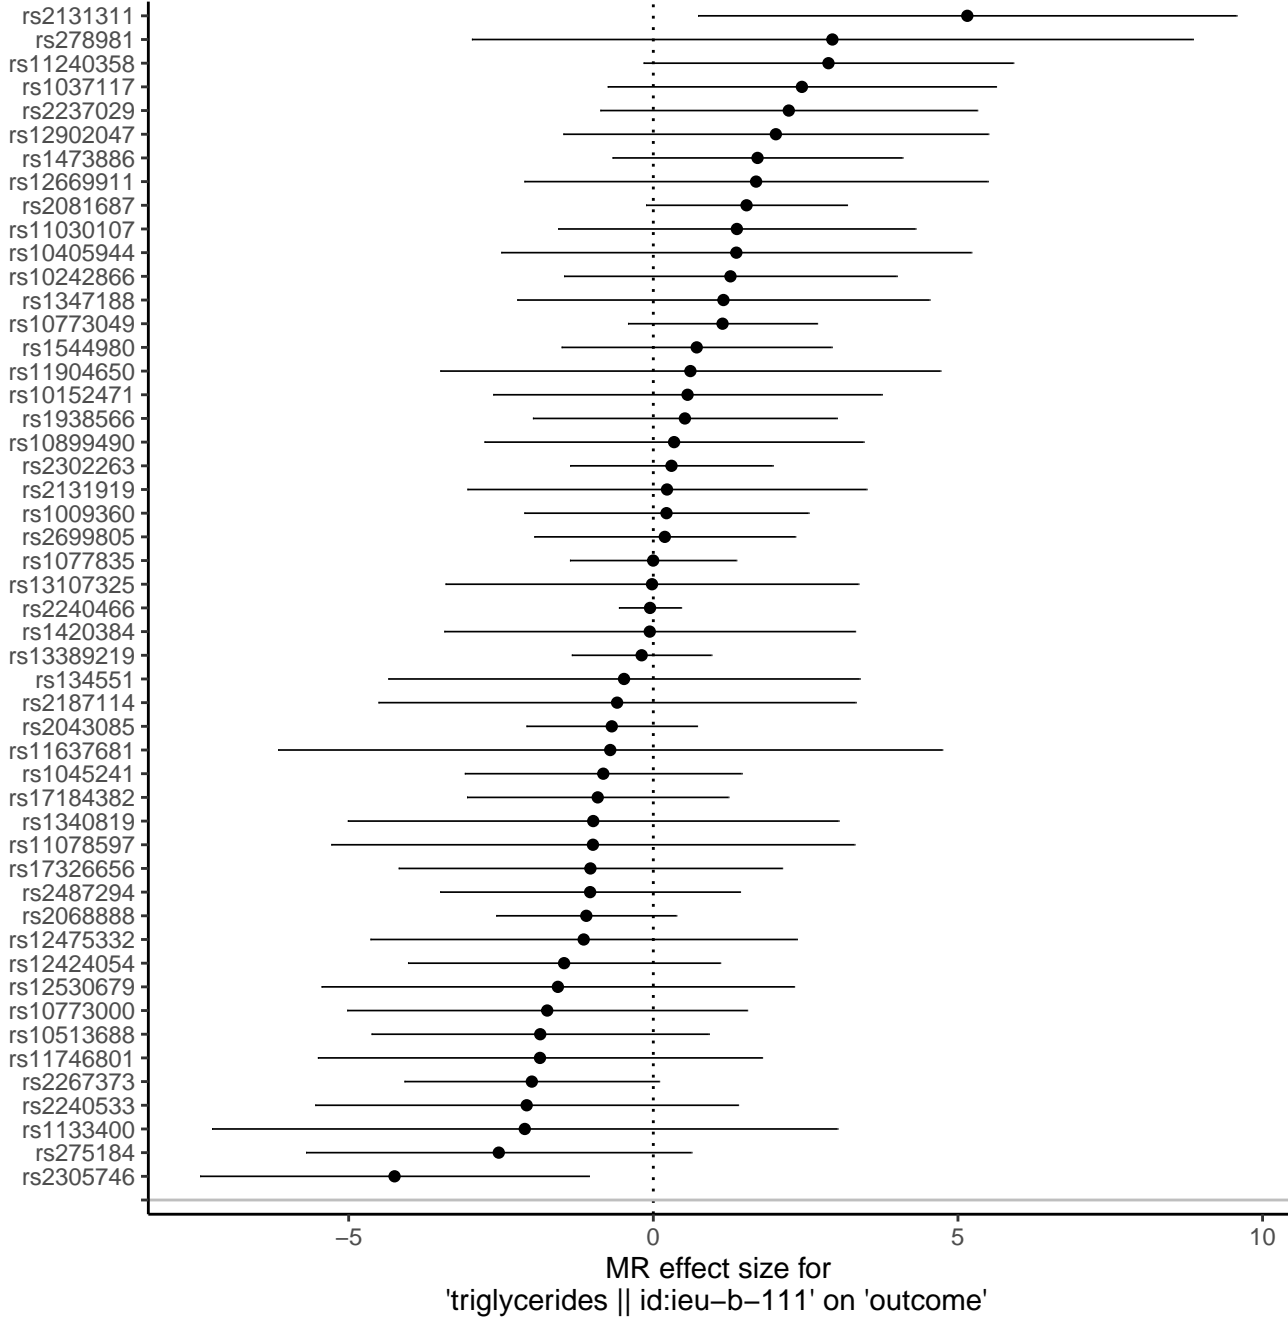

All – MR Egger  
All – Inverse variance weighted

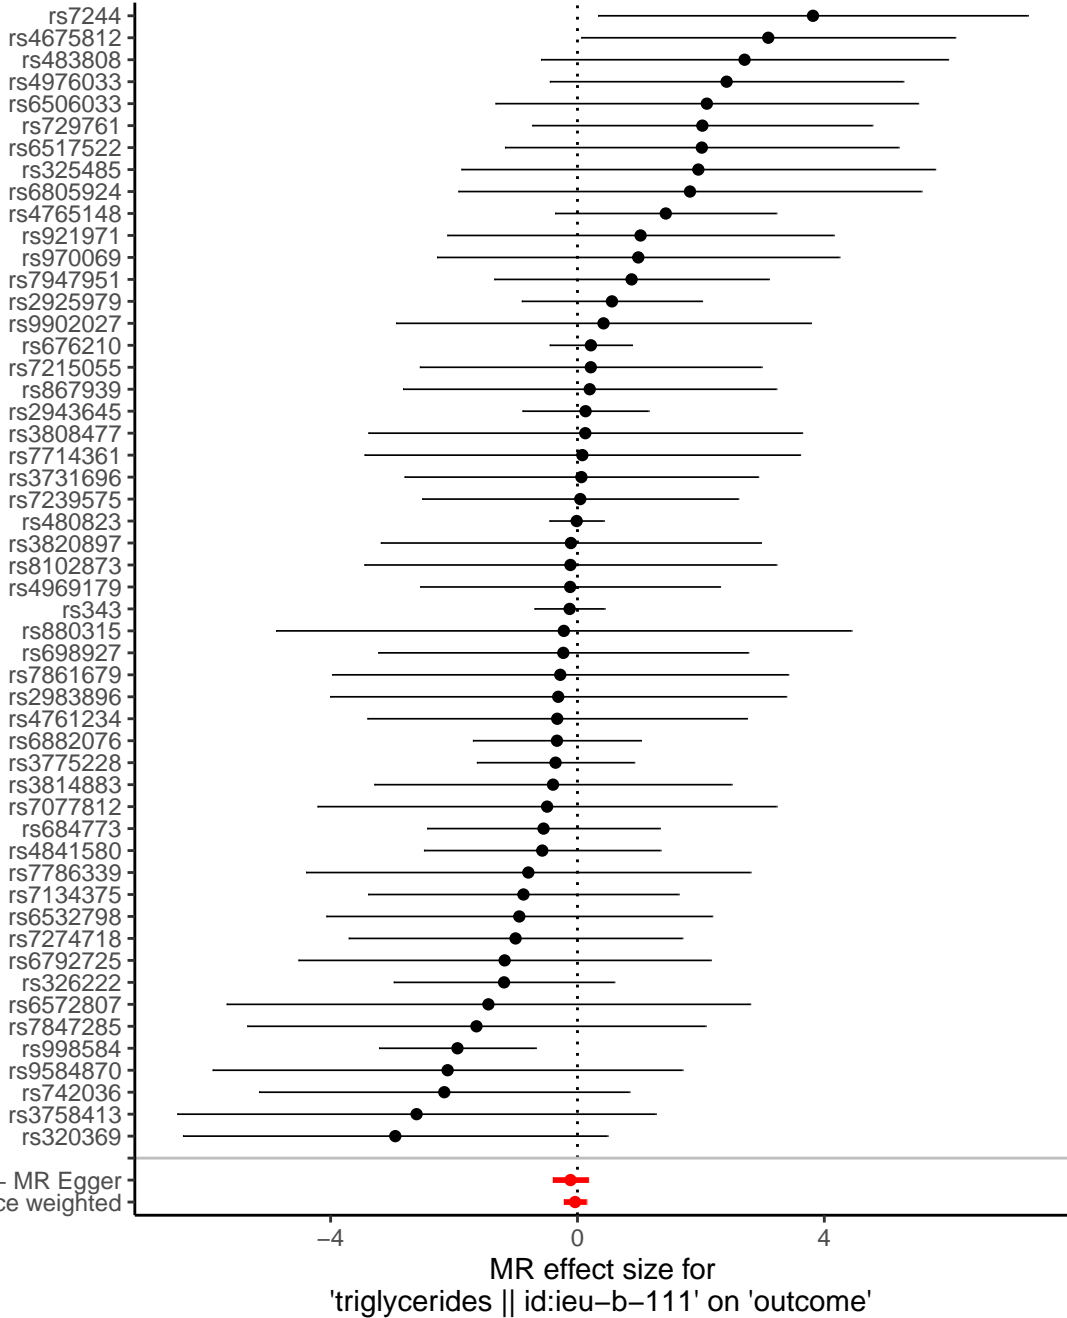

MR Test

- Inverse variance weighted
- MR Egger
- Simple mode
- Weighted median
- Weighted mode

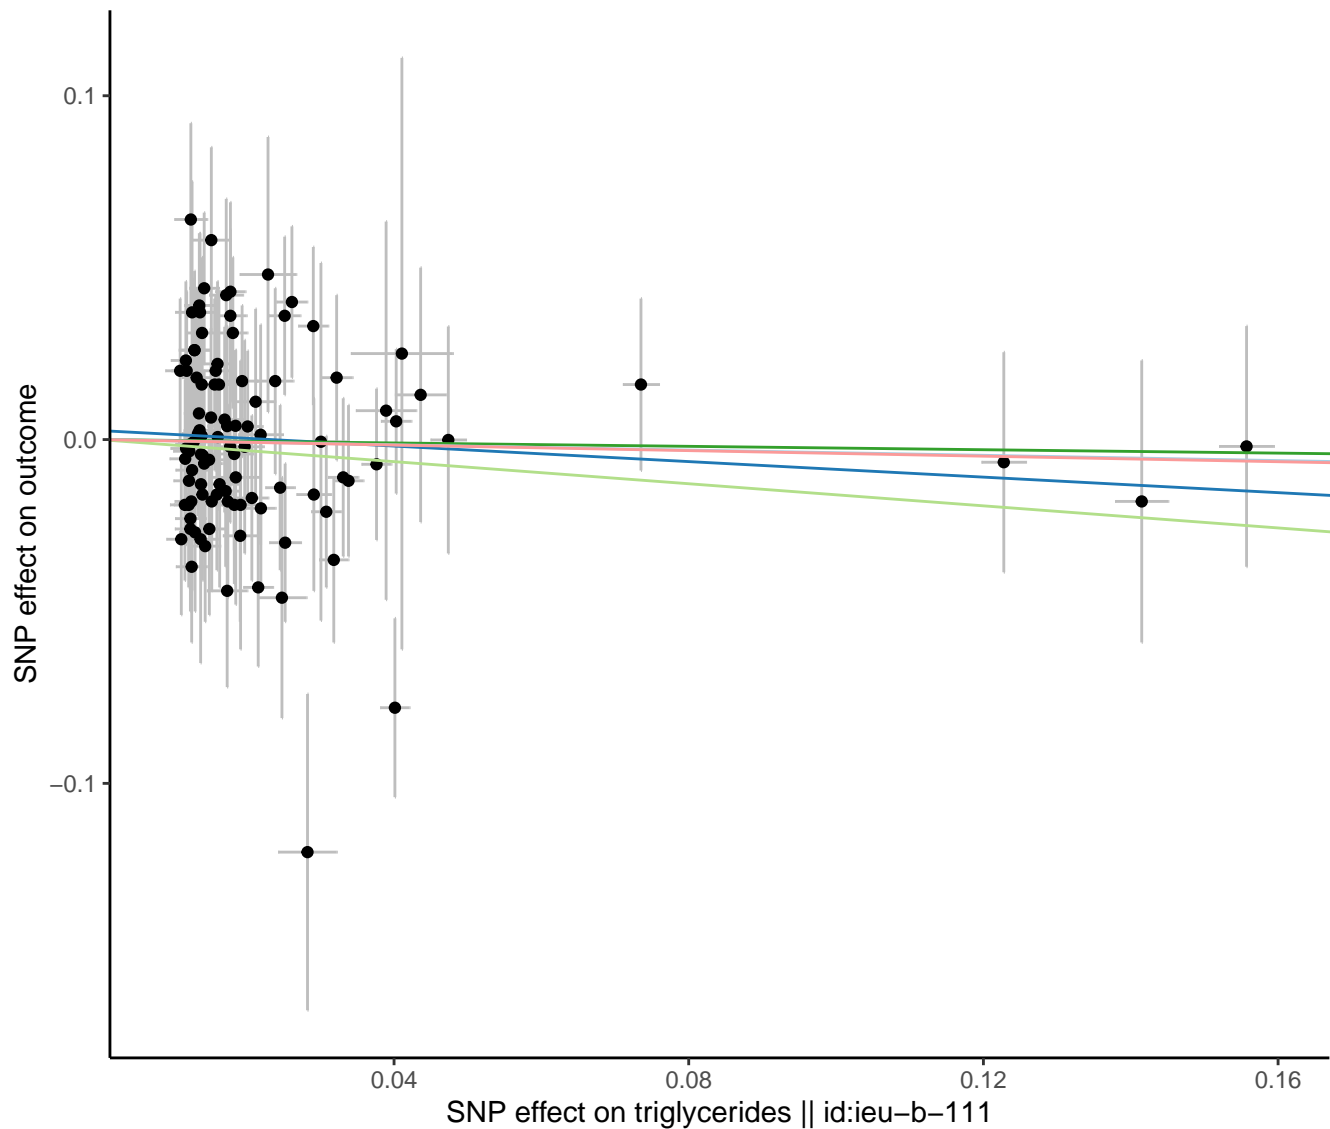

MR Method

Inverse variance weighted

MR Egger

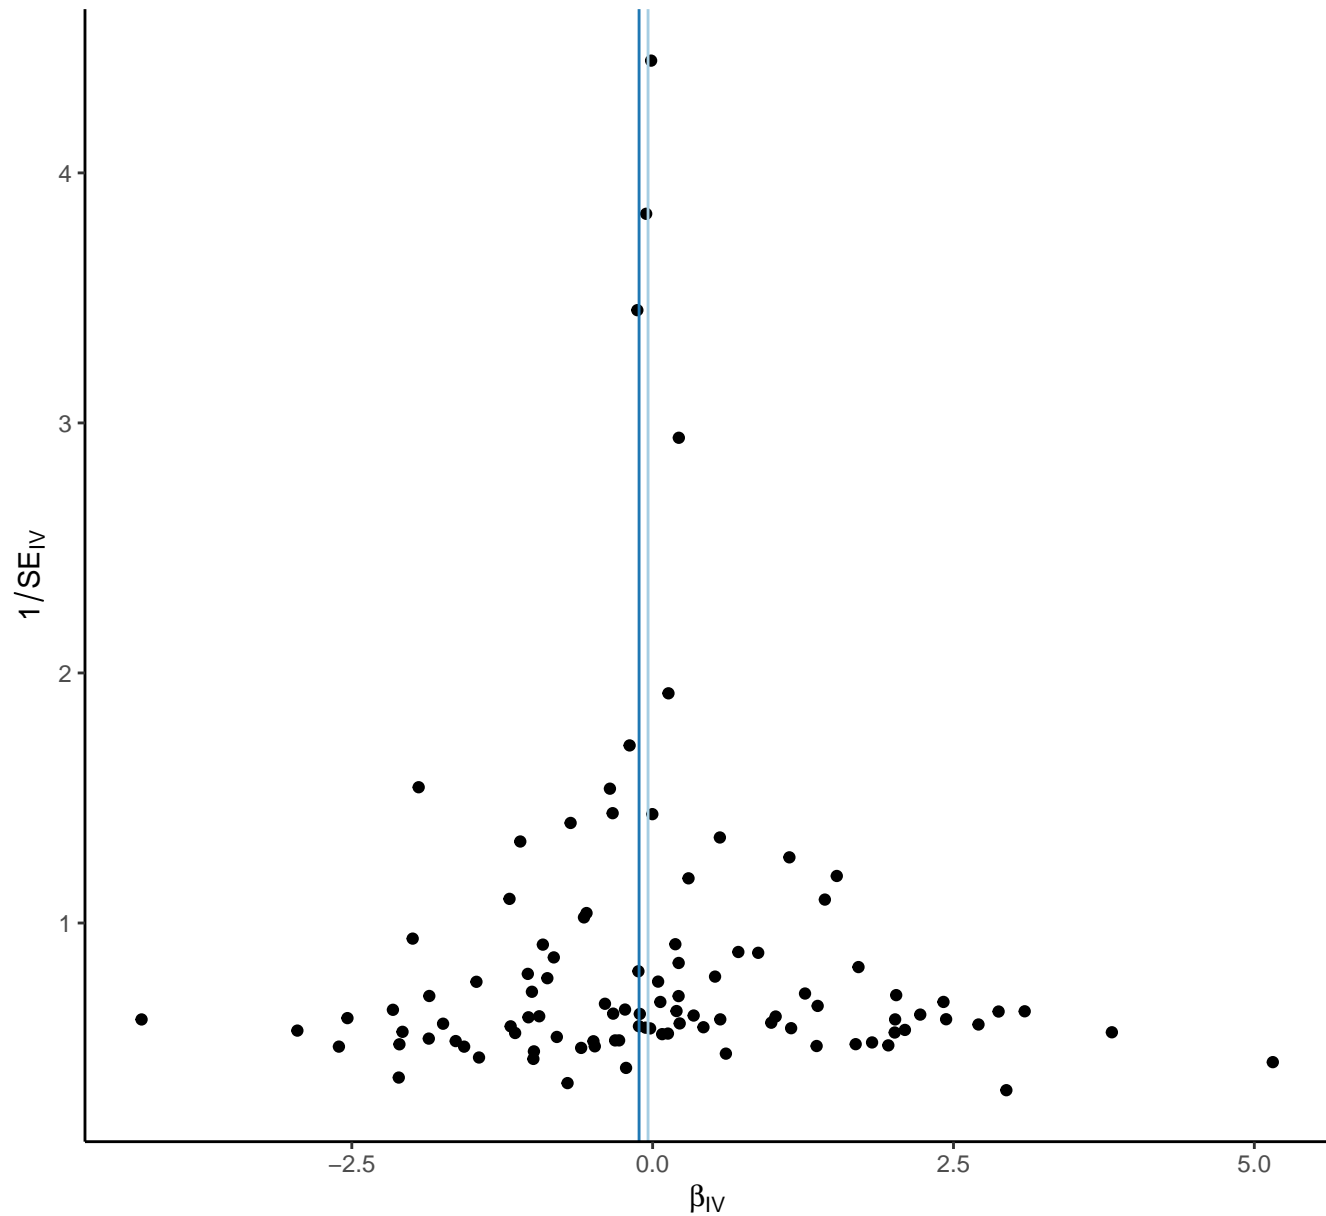

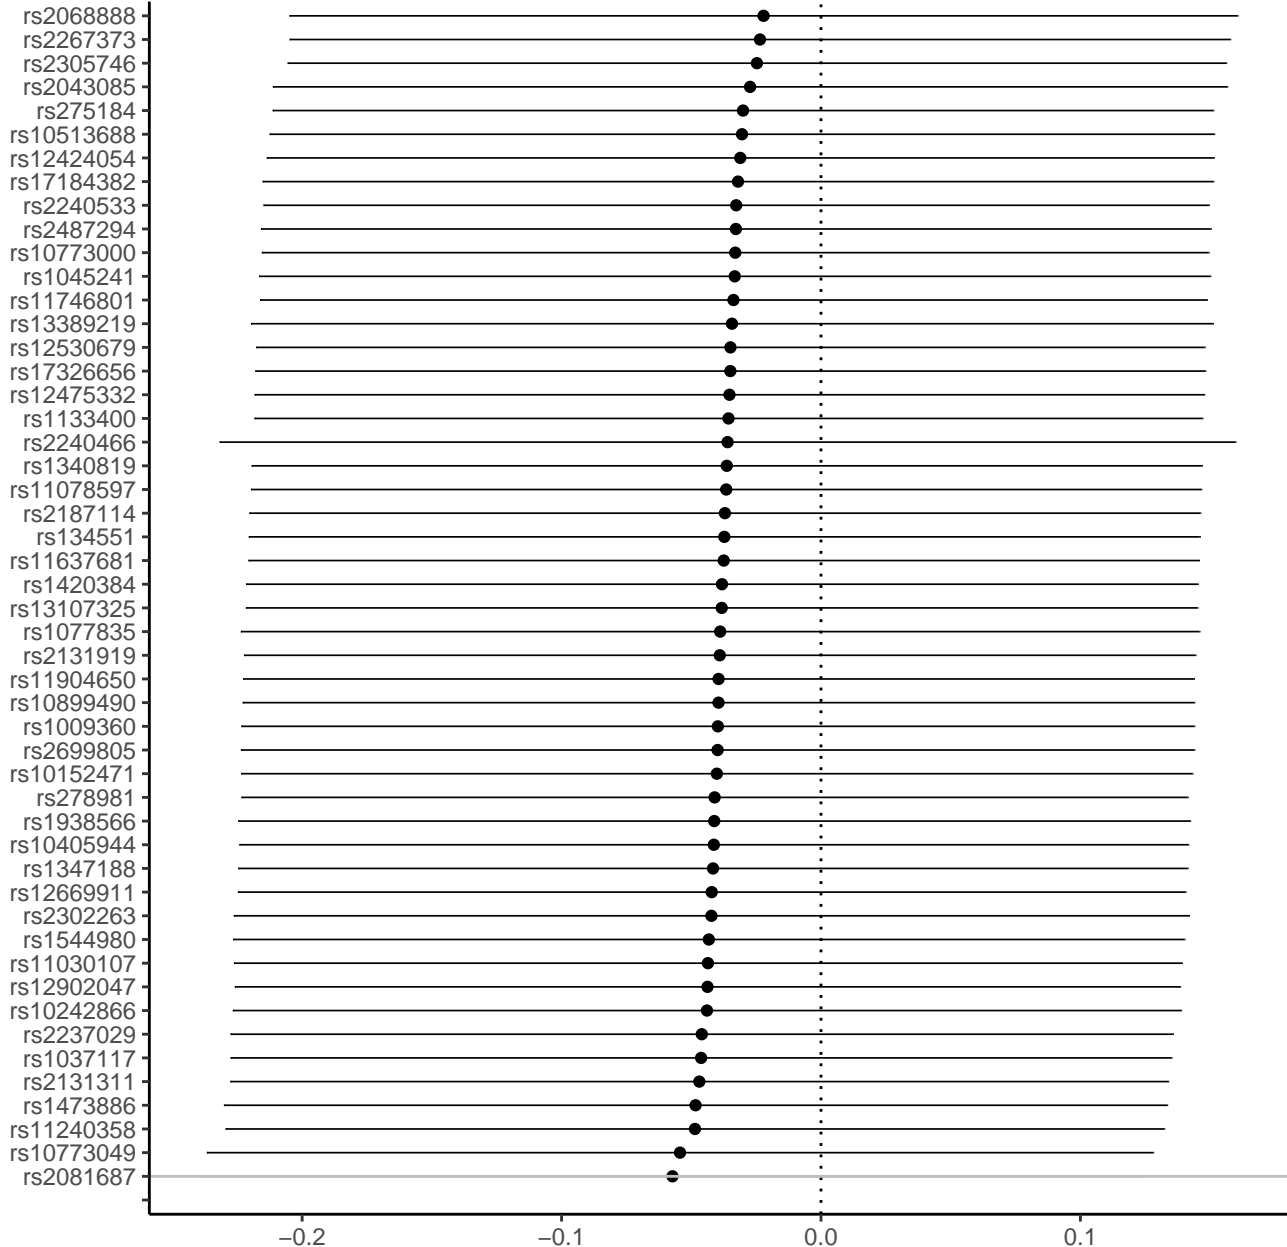

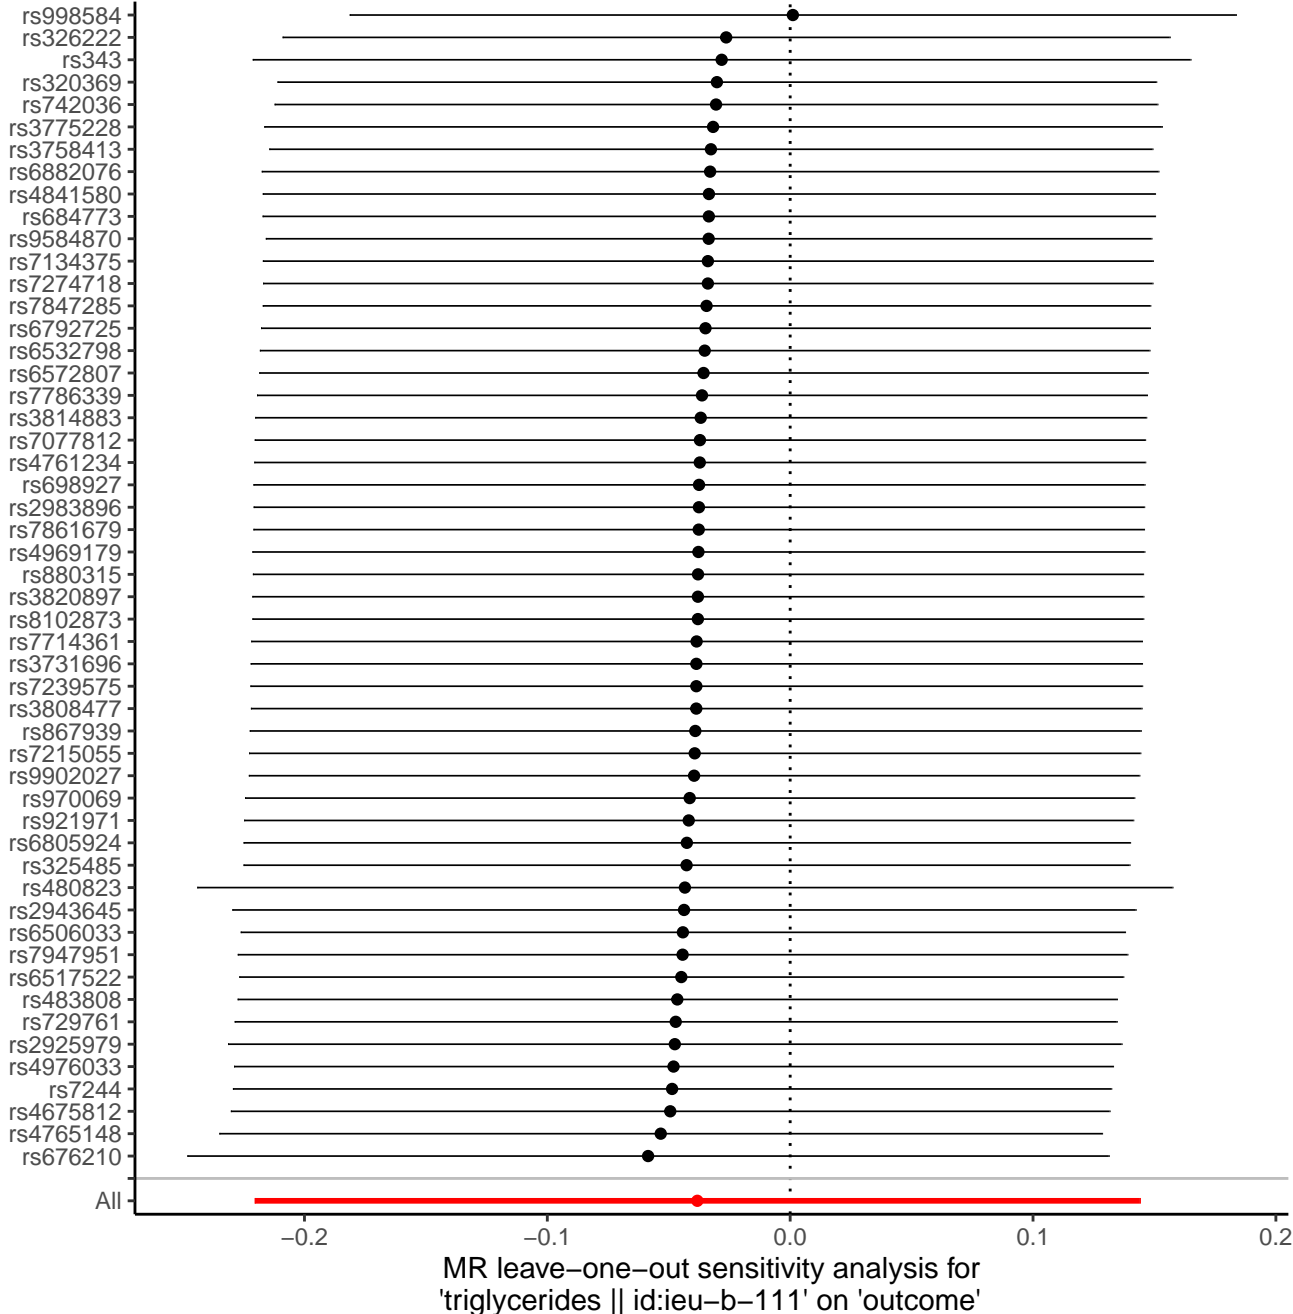

**Exposure: Waist-Hip Ratio adjusted for Body Mass Index, Outcome: Corrected Insulin Response adjusted for ISI**  
**Figures of Forest Plot, Comparison of Different MR Methods, Funnel Plot and Leave-one-out Sensitivity Analysis**

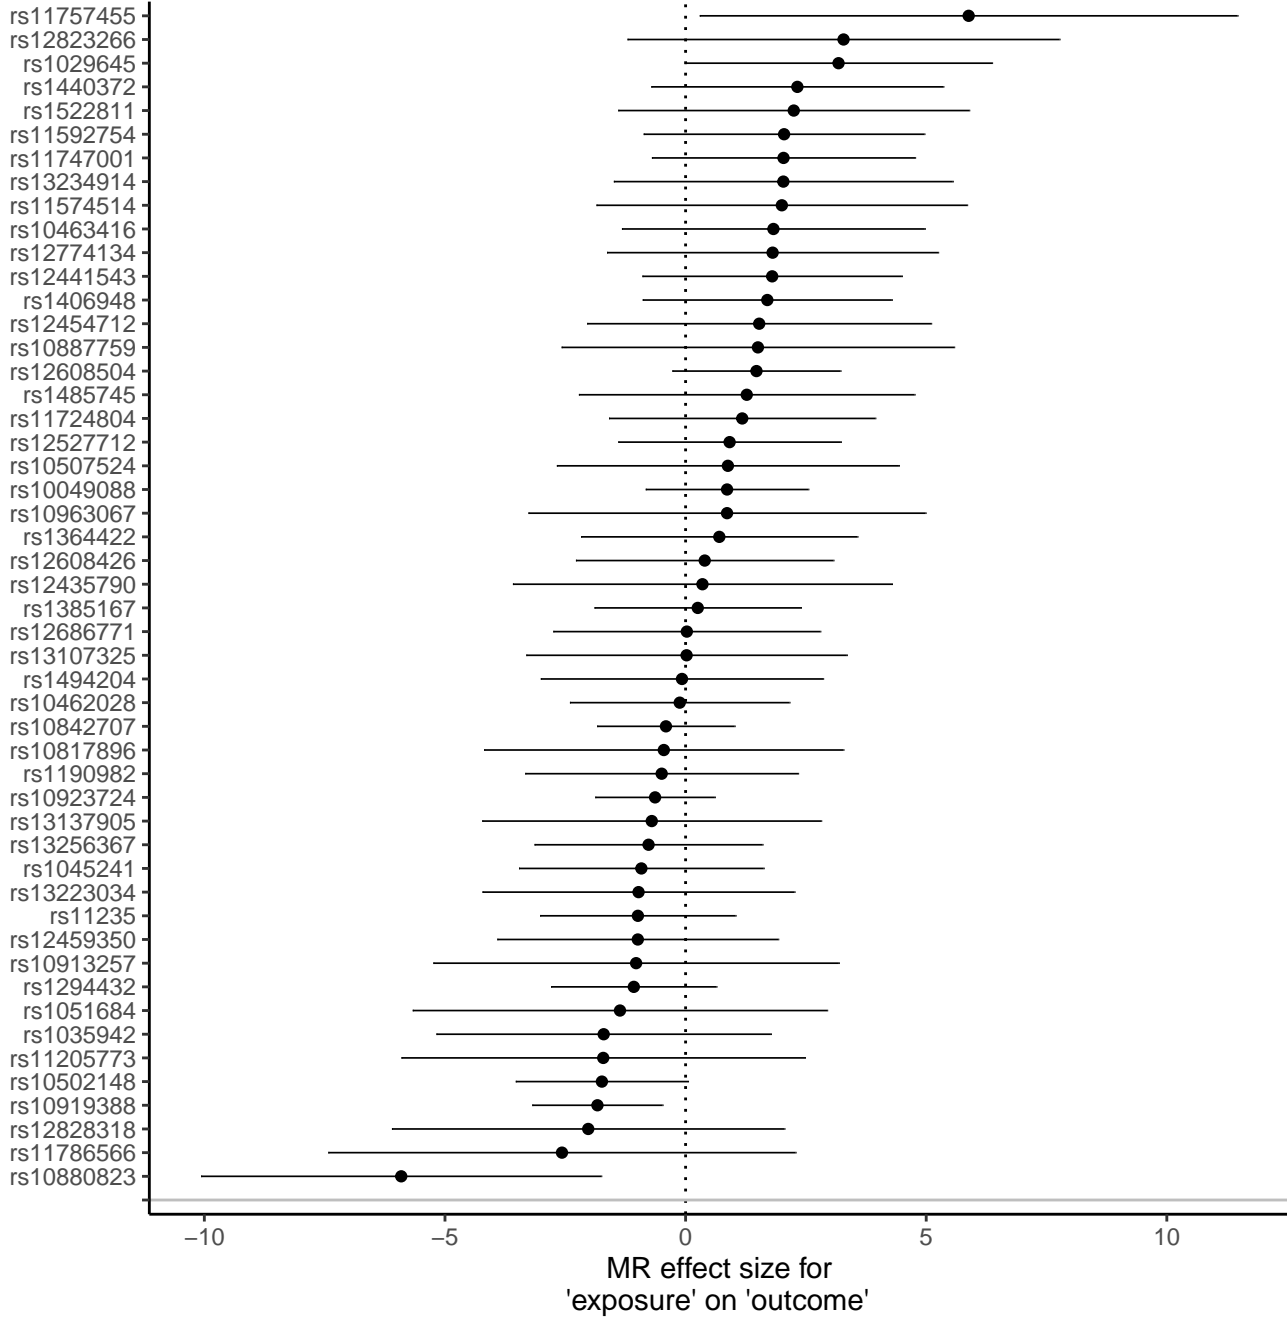



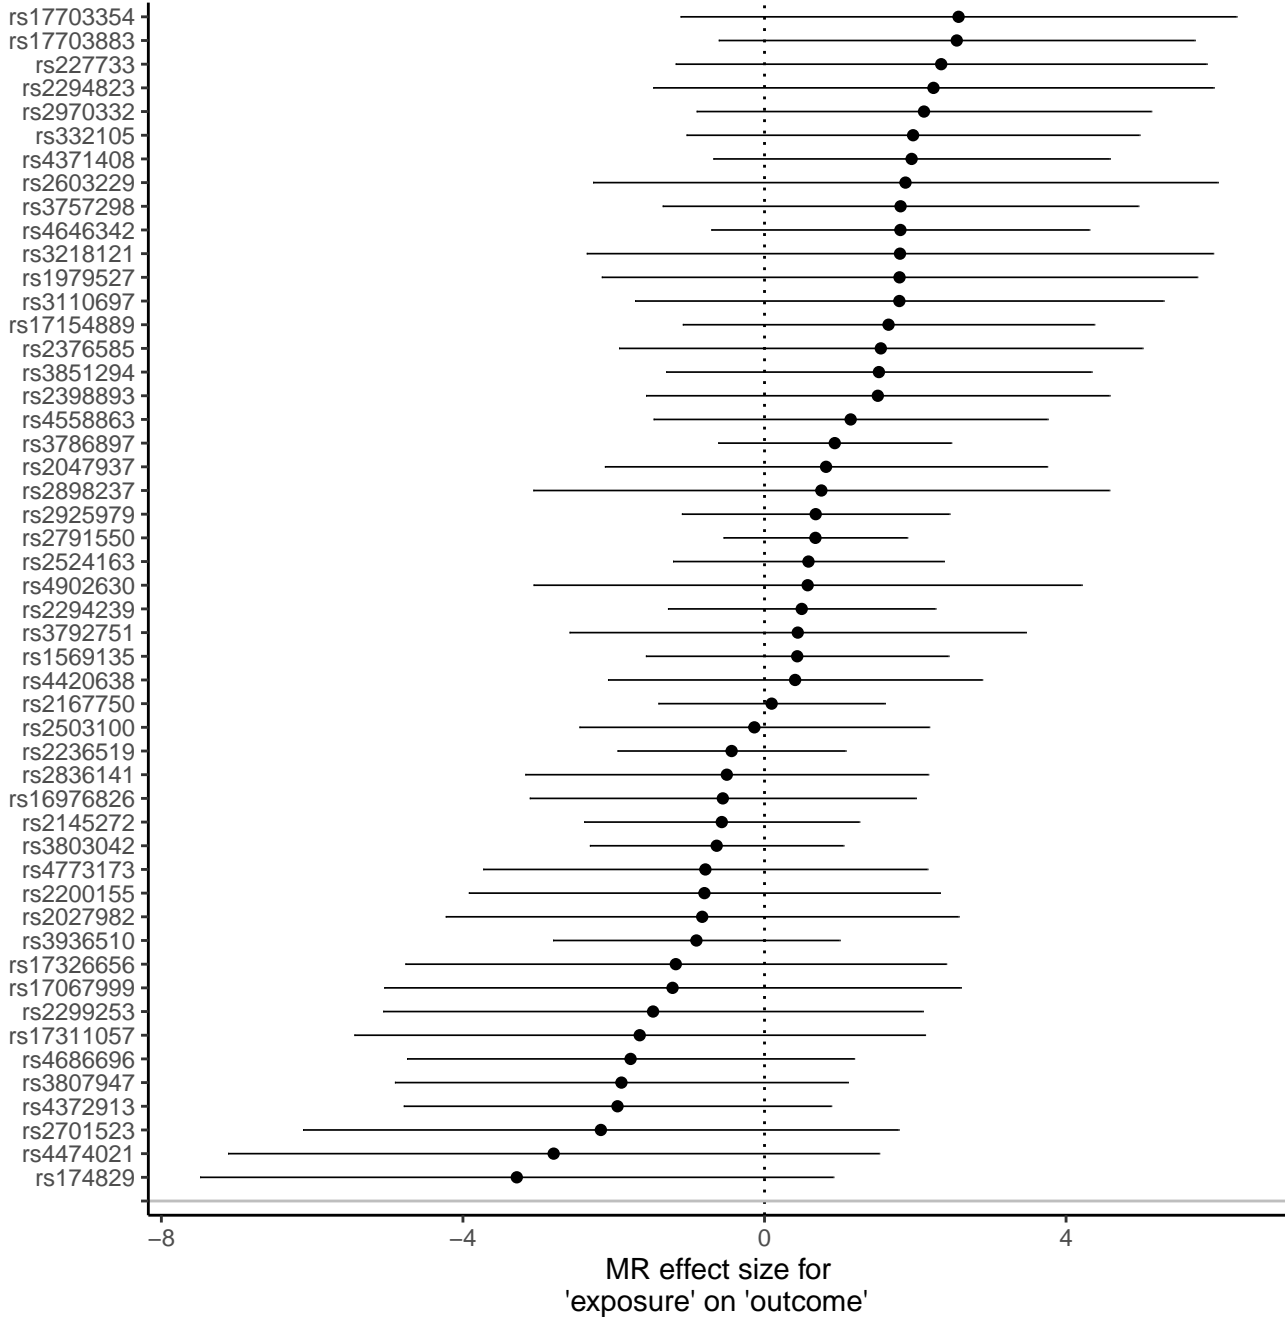

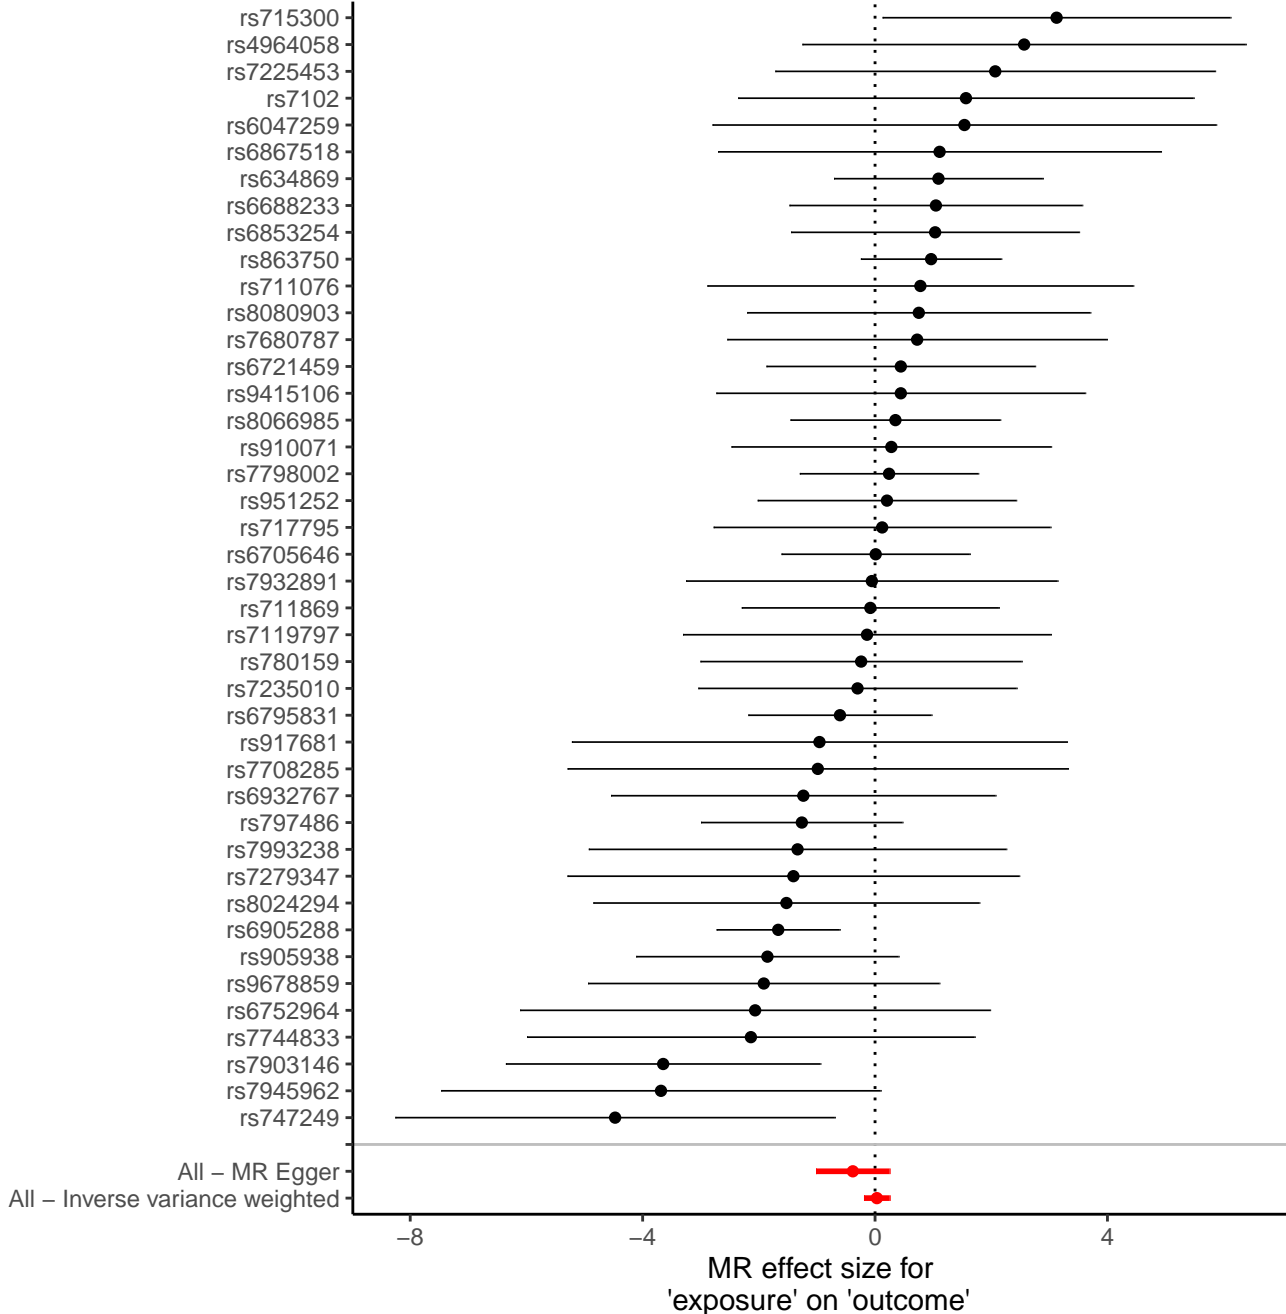

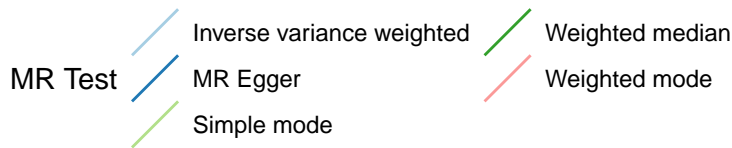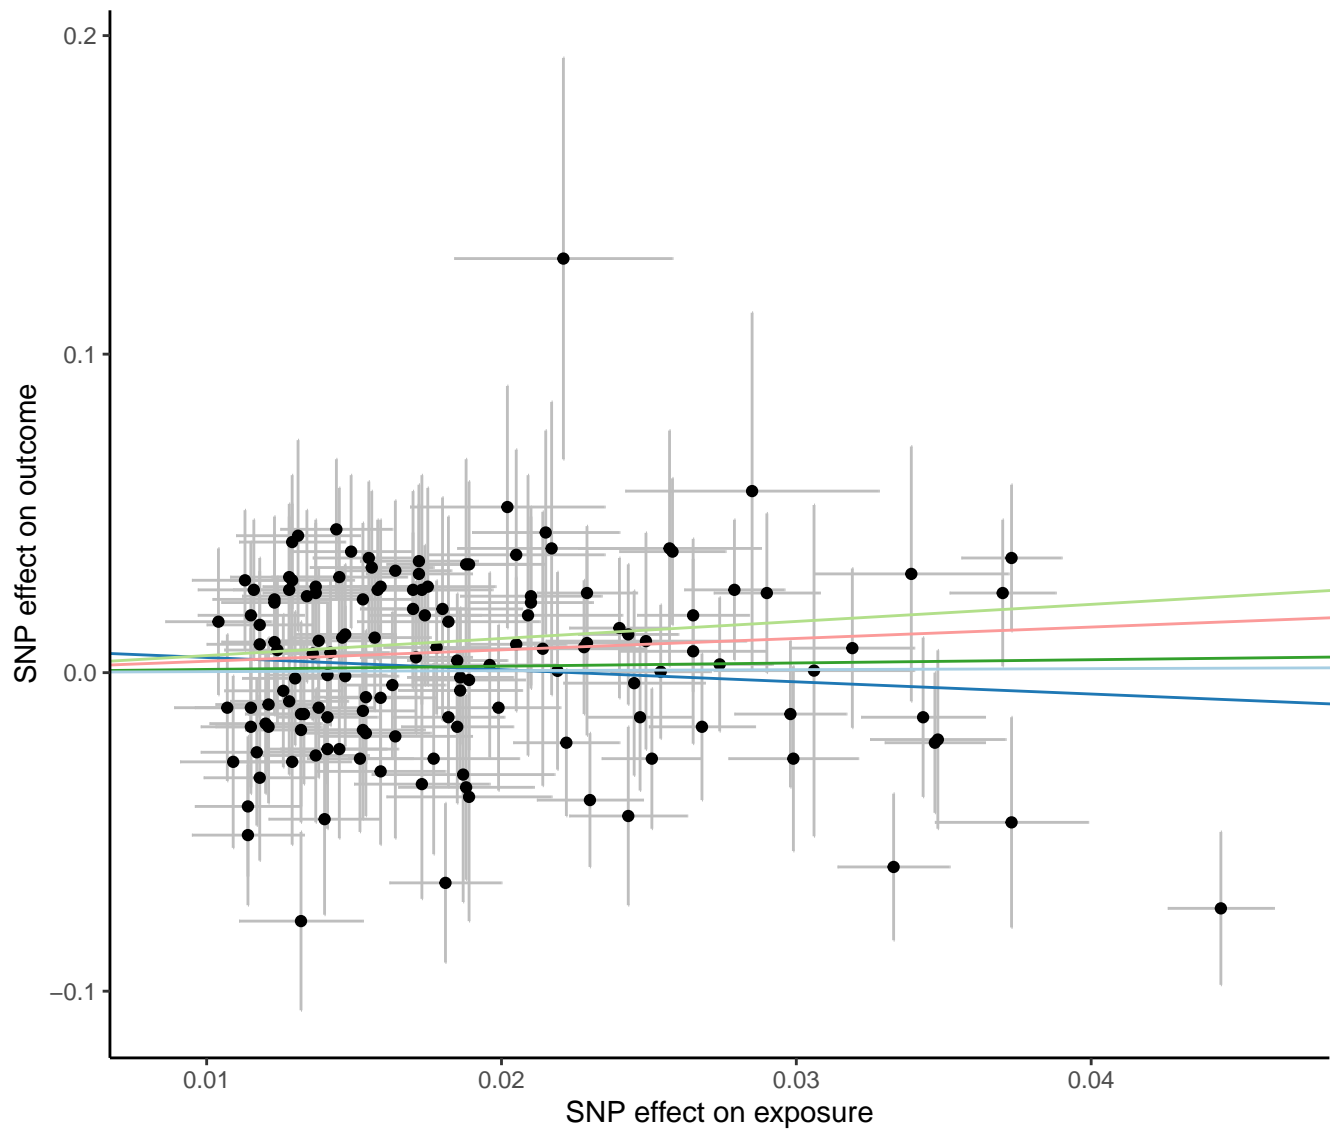

MR Method

Inverse variance weighted

MR Egger

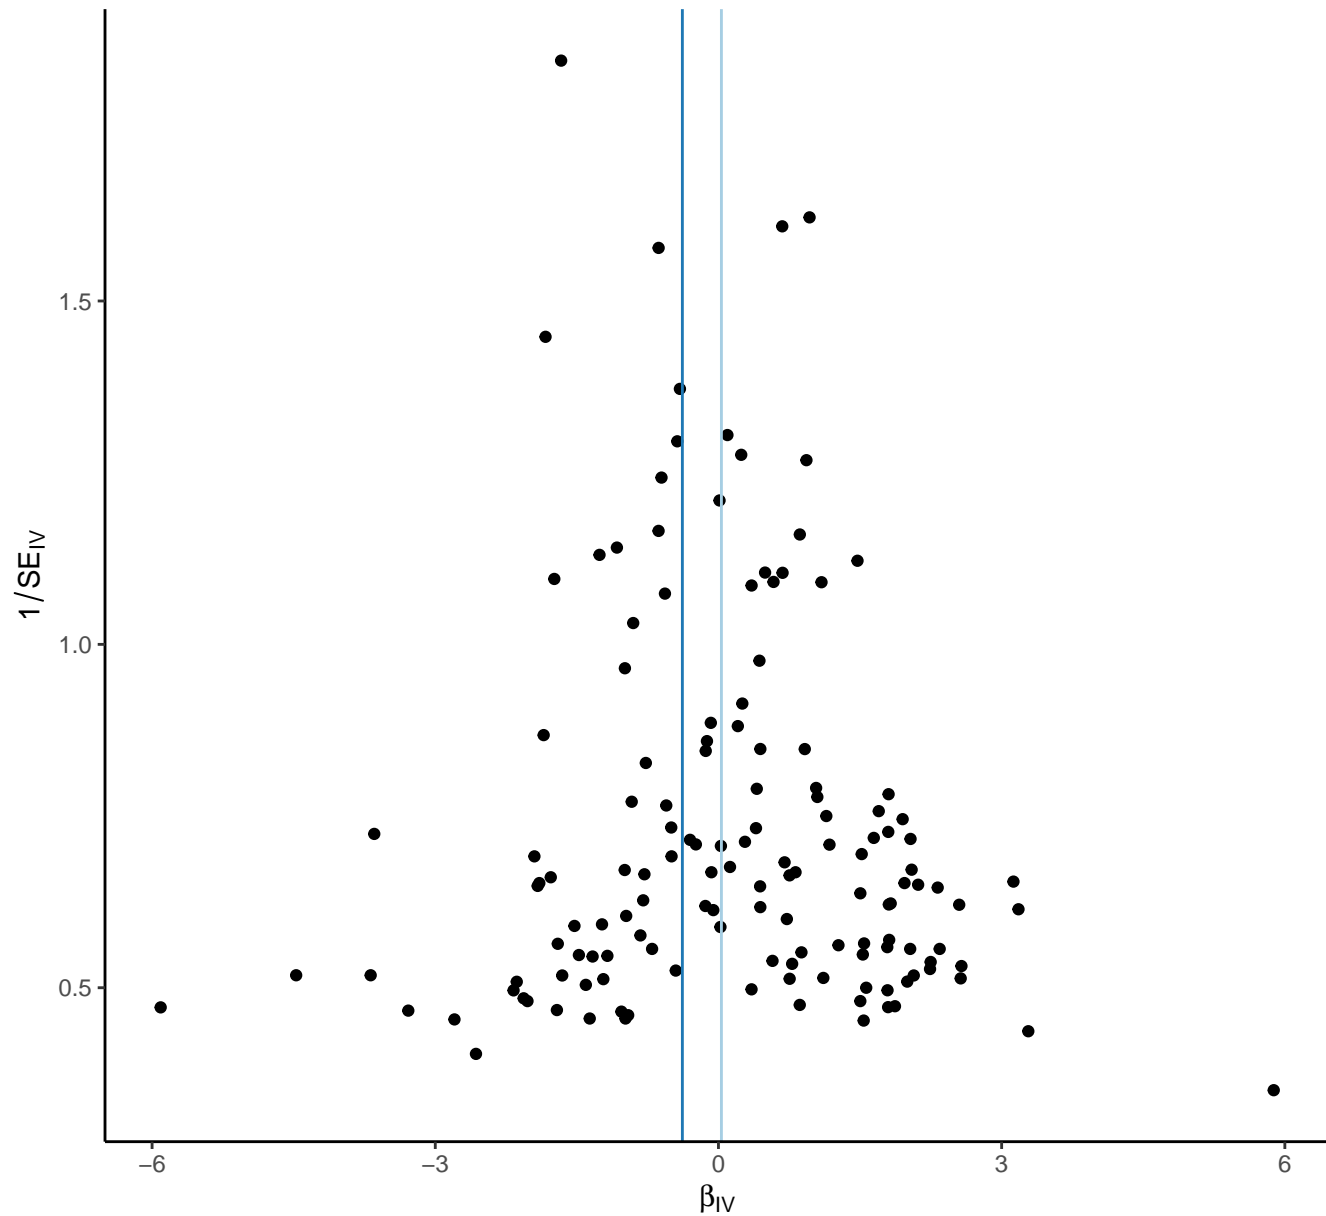

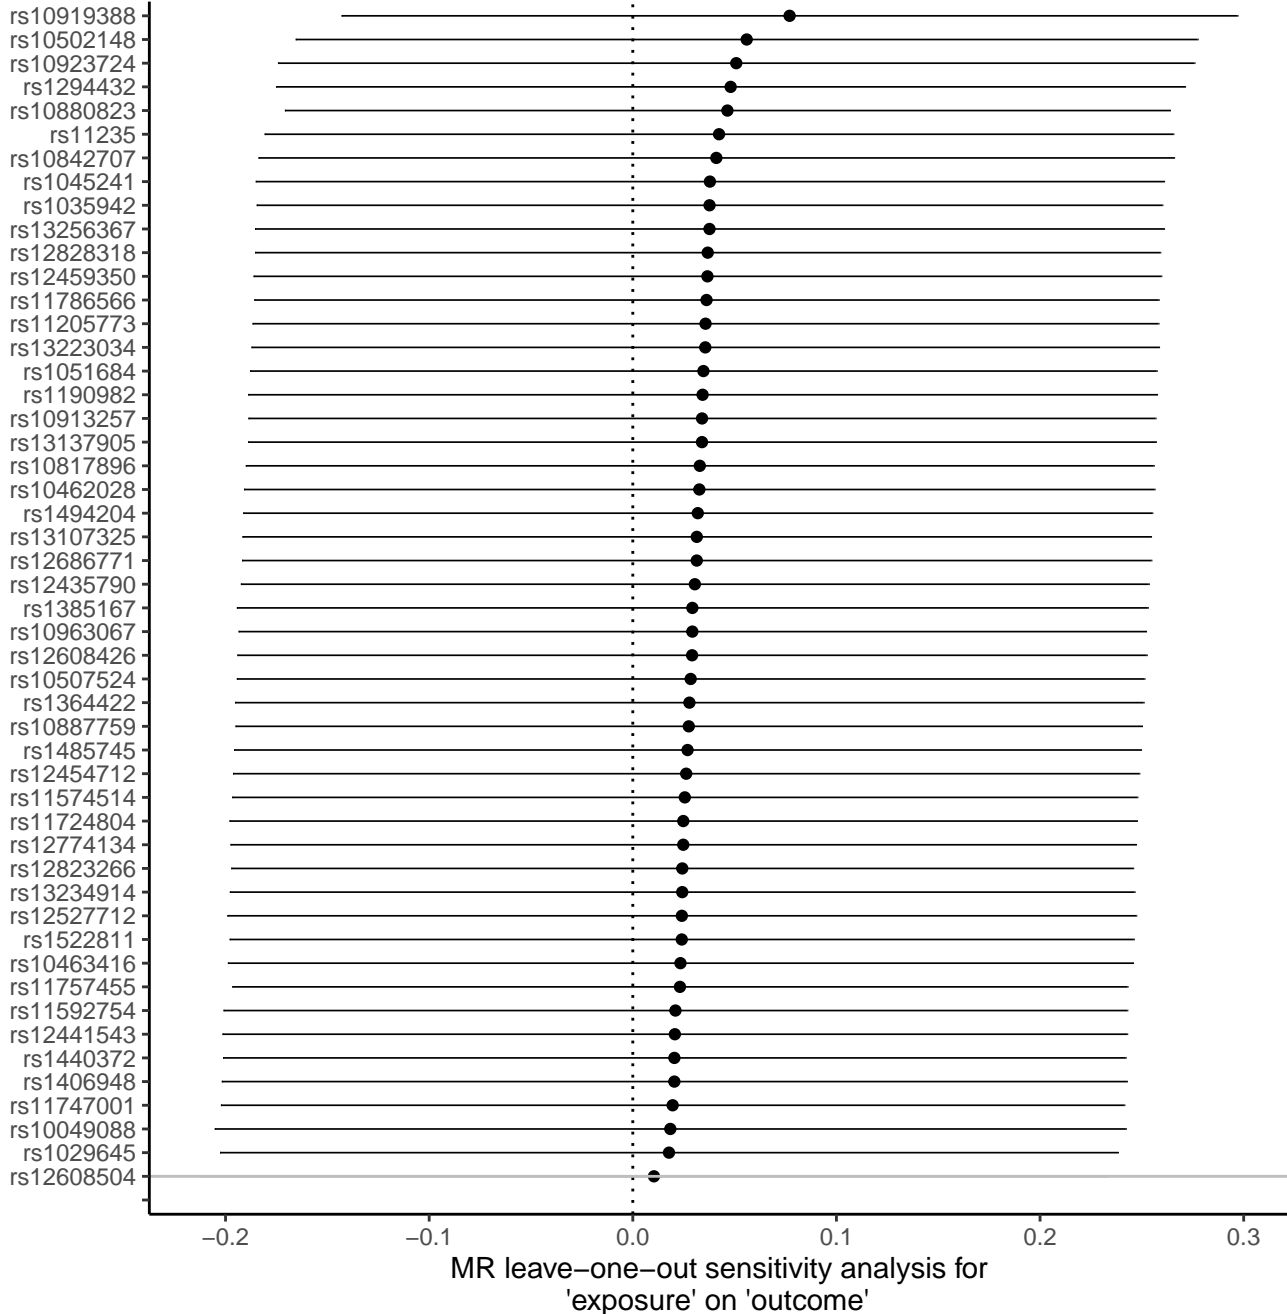

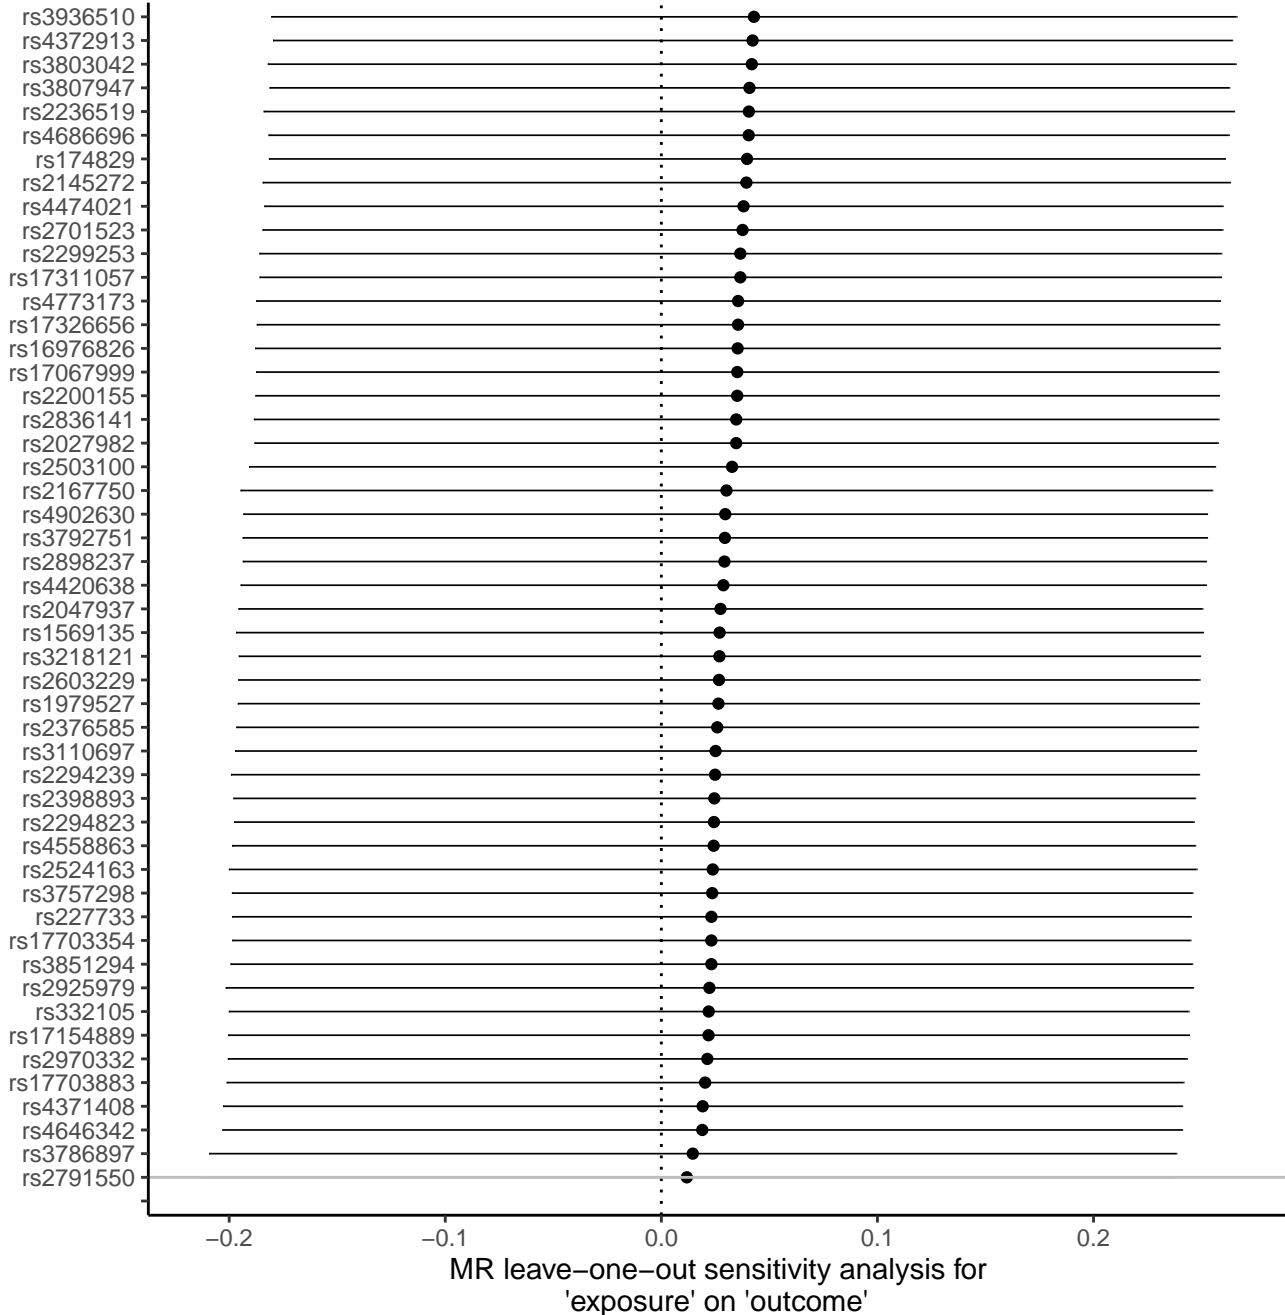

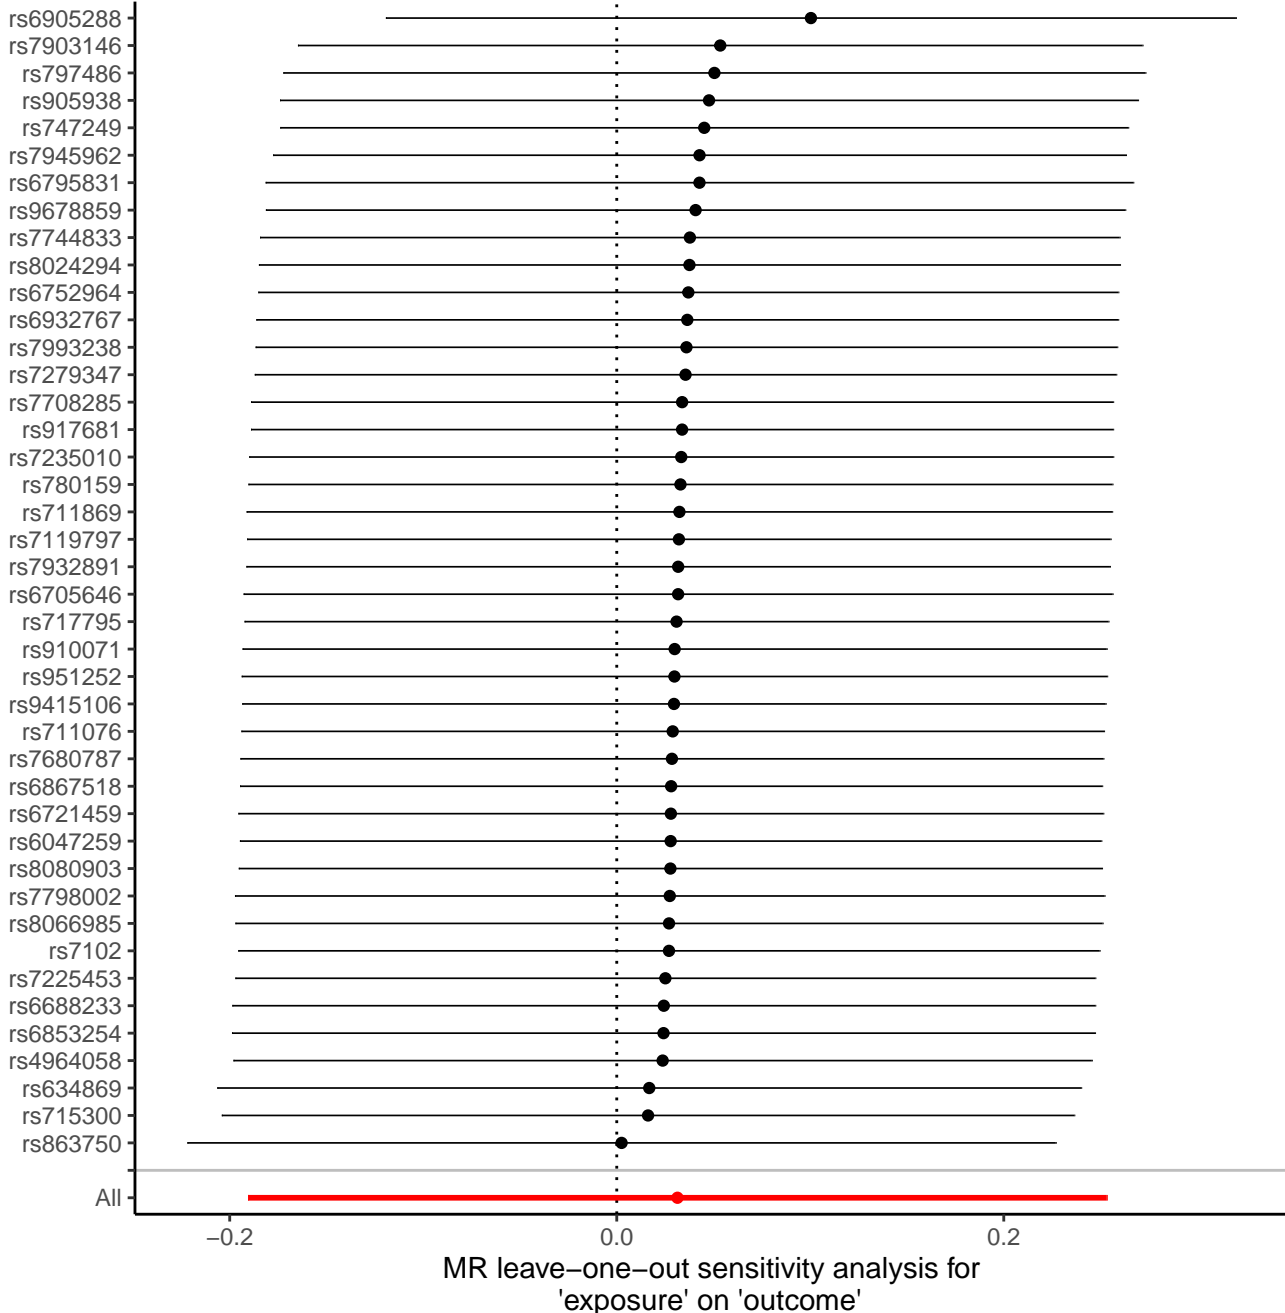

Supplement: Supplementary file 3 [file 2]
