# Supplementary material
Source: publisher figshare collection journal article supplement (https://diabetesjournals.figshare.com/articles/dataset/_/20112998)

## Supplementary File 2: Effect of corrected insulin response on cardiometabolic parameters

Exposure: Corrected Insulin Response Outcome: Waist-to-Hip Ratio

### Results from two sample MR:

| method                    | nsnp | b          | se        | pval      |
|---------------------------|------|------------|-----------|-----------|
| MR Egger                  | 7    | 0.0321250  | 0.0833561 | 0.7157958 |
| Weighted median           | 7    | -0.0133751 | 0.0137789 | 0.3317033 |
| Inverse variance weighted | 7    | 0.0095089  | 0.0239154 | 0.6909220 |
| Simple mode               | 7    | -0.0179172 | 0.0255213 | 0.5089538 |
| Weighted mode             | 7    | -0.0307832 | 0.0123619 | 0.0471514 |

### Heterogeneity tests

| method                    | Q        | Q_df | Q_pval |
|---------------------------|----------|------|--------|
| MR Egger                  | 66.34434 | 5    | 0      |
| Inverse variance weighted | 67.42627 | 6    | 0      |

### Test for directional horizontal pleiotropy

| egger_intercept | se        | pval      |
|-----------------|-----------|-----------|
| -0.0023367      | 0.0081833 | 0.7866736 |

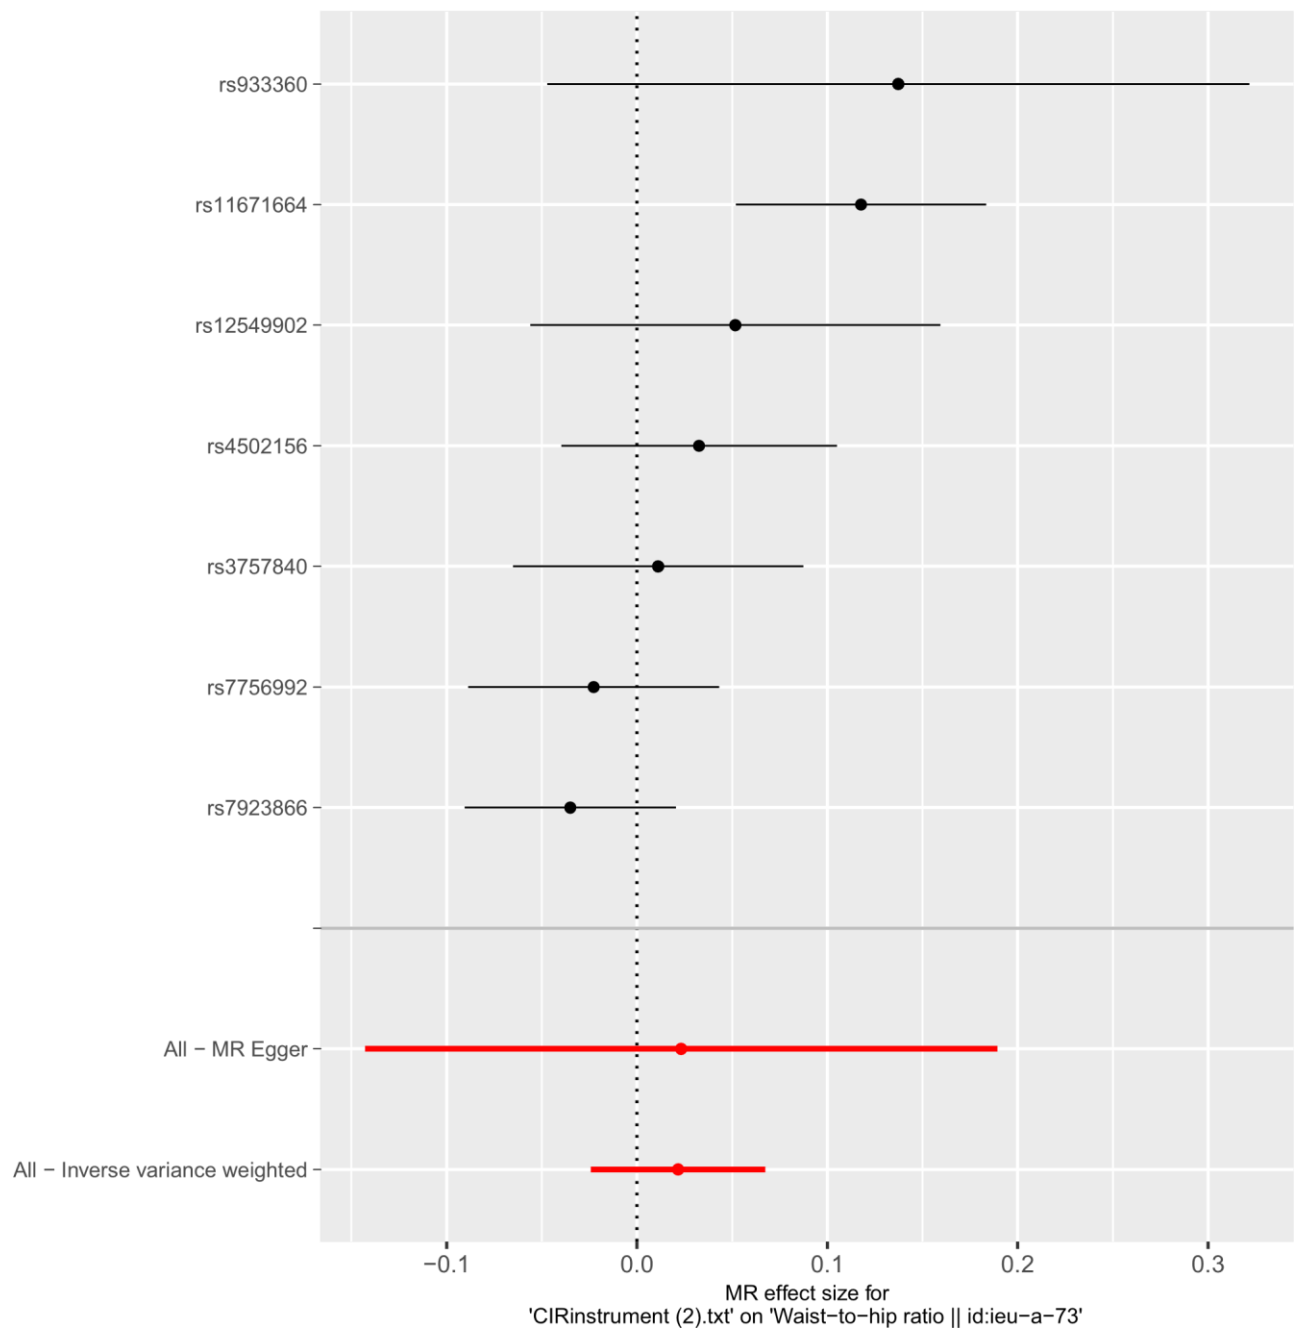

MR Test

- Inverse variance weighted
- MR Egger
- Weighted median
- Weighted mode

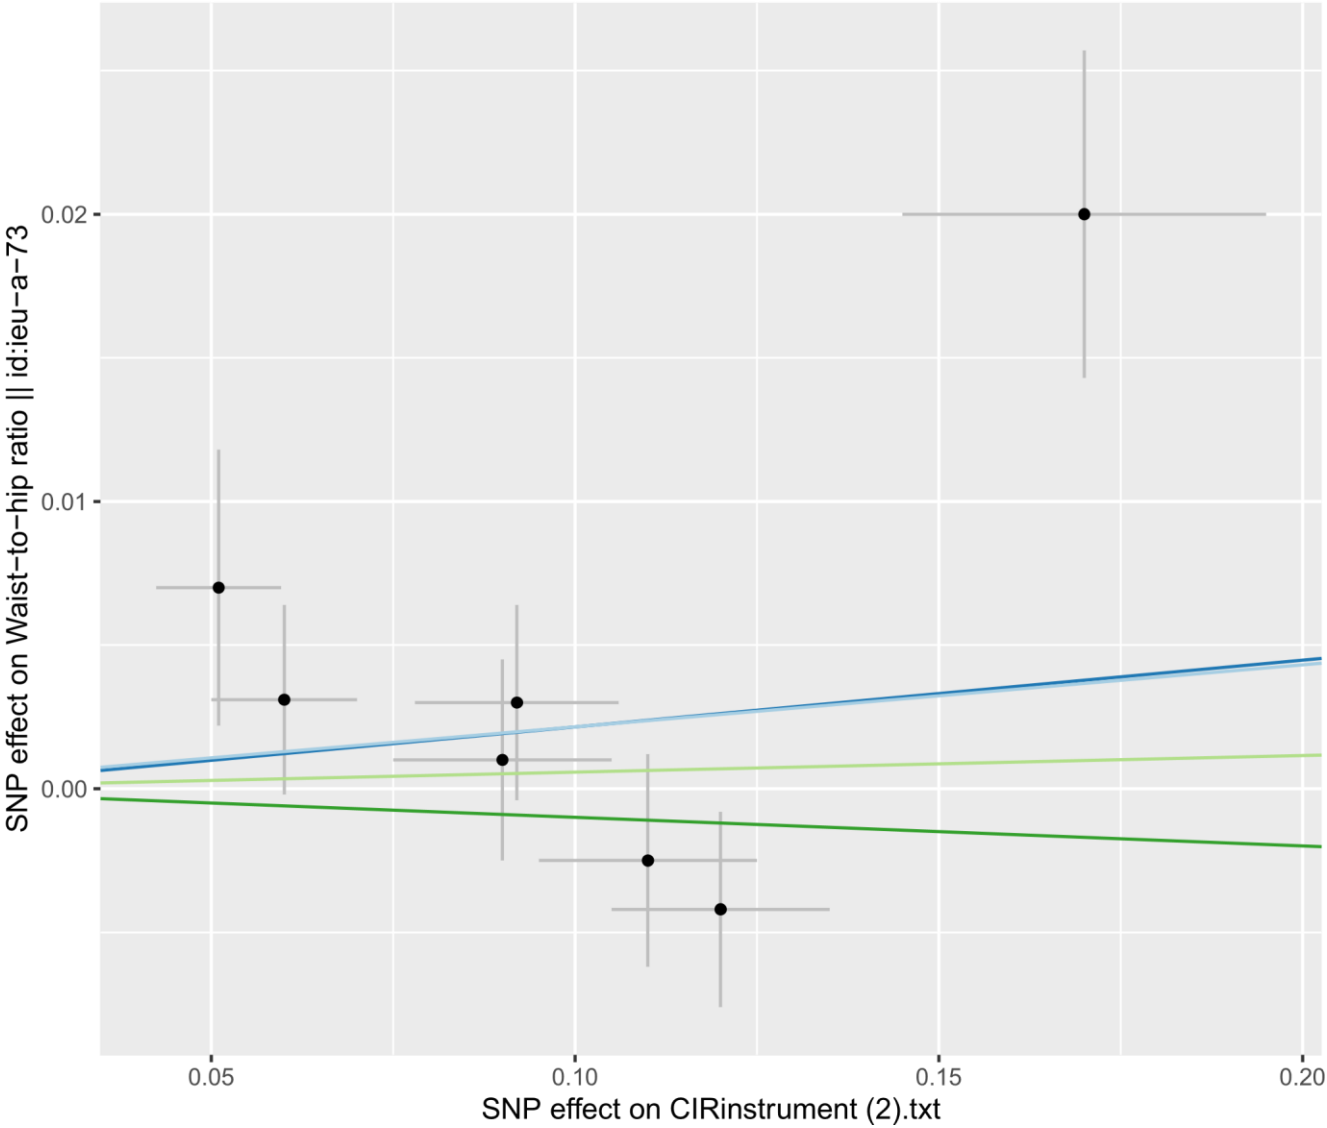

# MR Method

- Inverse variance weighted
- MR Egger

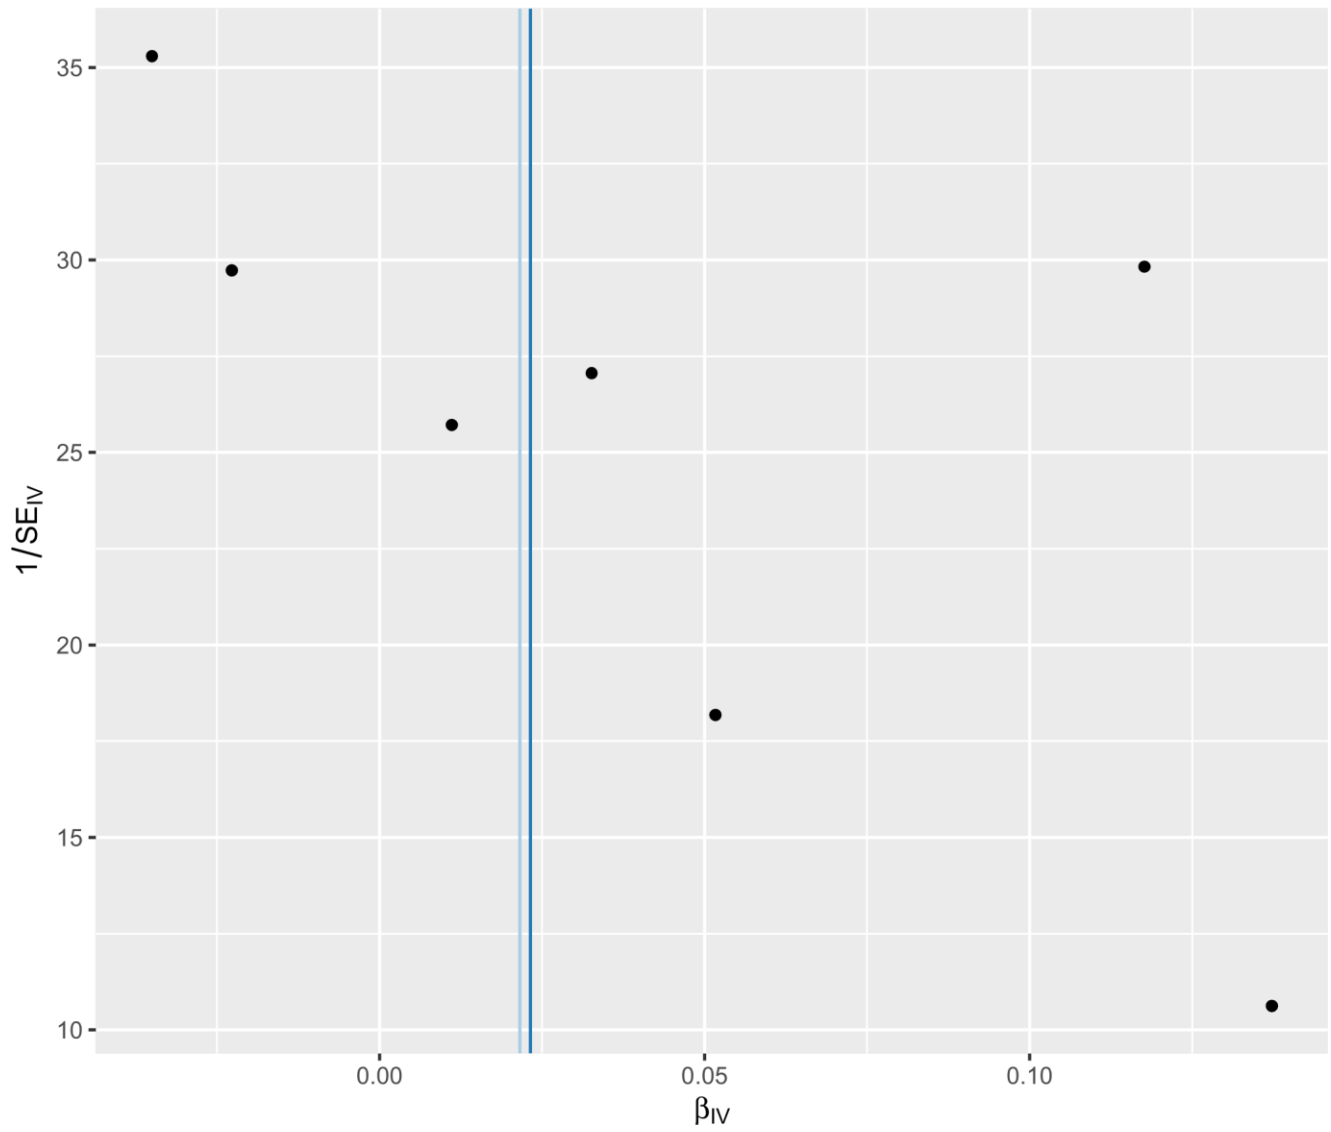

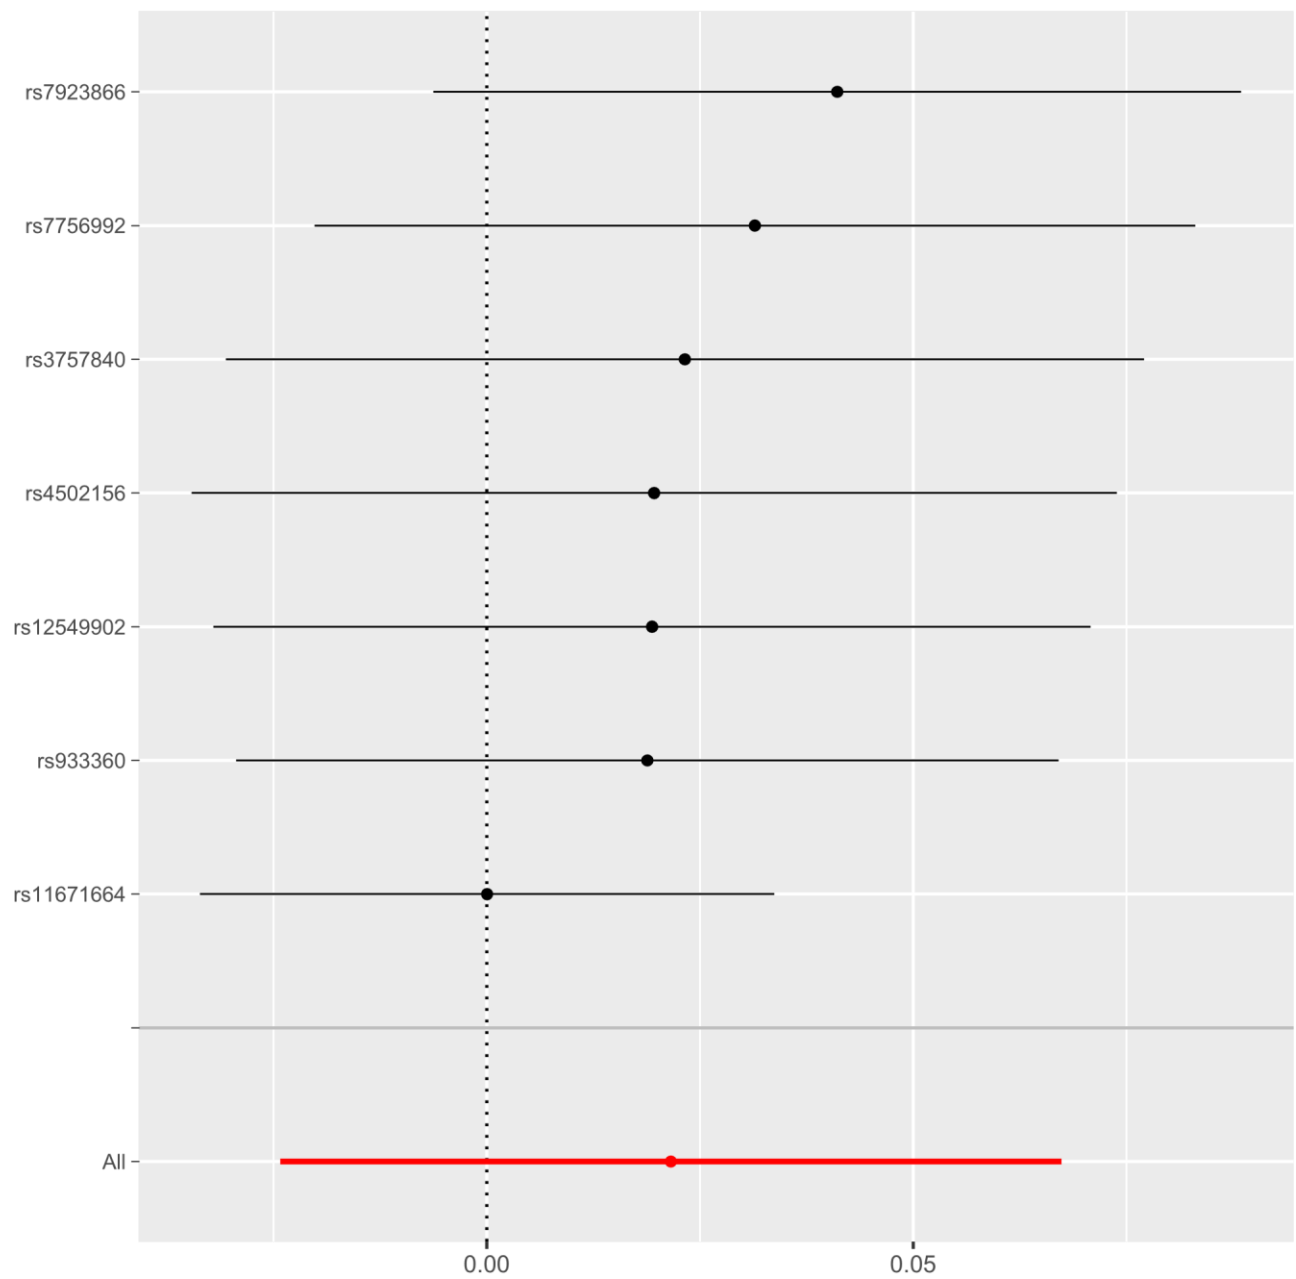

MR leave-one-out sensitivity analysis for  
'CIRinstrument (2).txt' on 'Waist-to-hip ratio || id:ieu-a-73'

**Exposure: Corrected Insulin Response, Outcome: Waist-to-Hip Ratio adjusted for Body Mass Index**

## **Results from two sample MR:**

| <b>method</b>             | <b>nsnp</b> | <b>b</b>   | <b>se</b> | <b>pval</b> |
|---------------------------|-------------|------------|-----------|-------------|
| MR Egger                  | 7           | -0.0676635 | 0.0851654 | 0.4629326   |
| Weighted median           | 7           | 0.0090489  | 0.0140206 | 0.5186665   |
| Inverse variance weighted | 7           | -0.0181022 | 0.0253012 | 0.4743184   |
| Simple mode               | 7           | 0.0420798  | 0.0177506 | 0.0554743   |
| Weighted mode             | 7           | 0.0347674  | 0.0207333 | 0.1445785   |

## **Heterogeneity tests**

| <b>method</b>             | <b>Q</b> | <b>Q_df</b> | <b>Q_pval</b> |
|---------------------------|----------|-------------|---------------|
| MR Egger                  | 68.26968 | 5           | 0             |
| Inverse variance weighted | 73.39894 | 6           | 0             |

## **Test for directional horizontal pleiotropy**

| <b>egger_intercept</b> | <b>se</b> | <b>pval</b> |
|------------------------|-----------|-------------|
| 0.0051008              | 0.0083222 | 0.566737    |

# MR Test

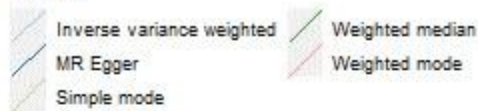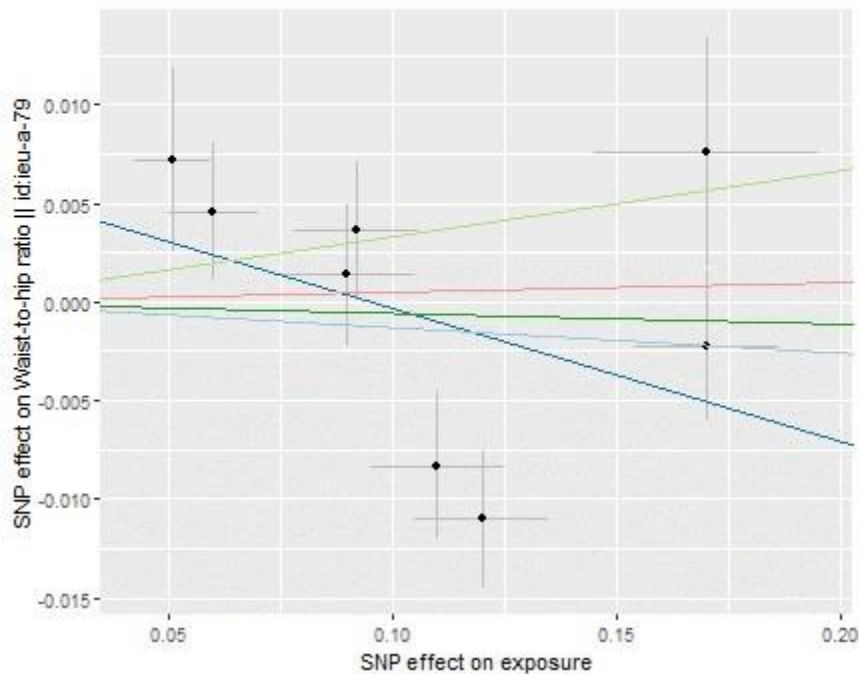

# MR Method

- Inverse variance weighted
- MR Egger

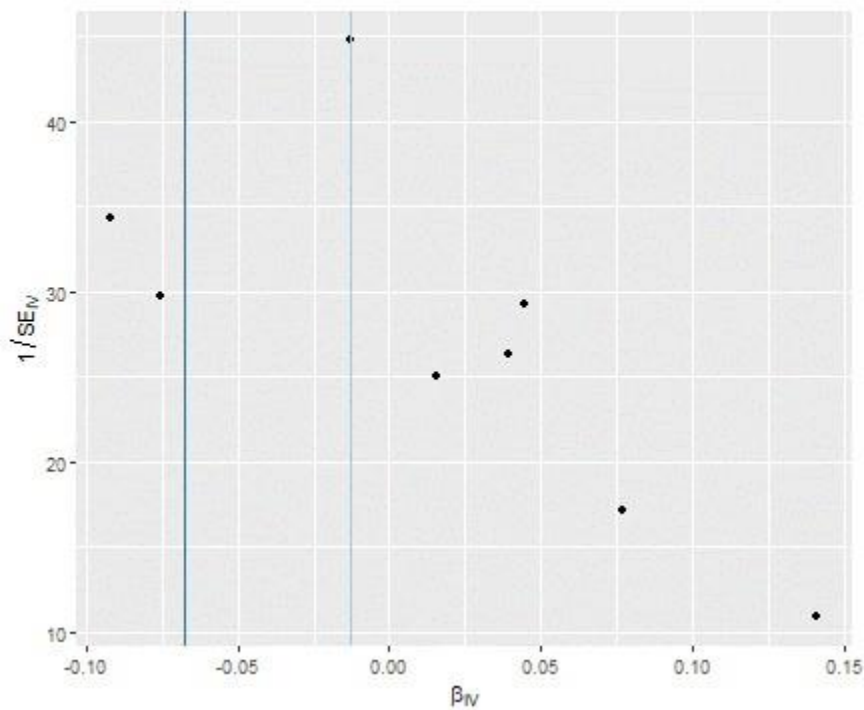



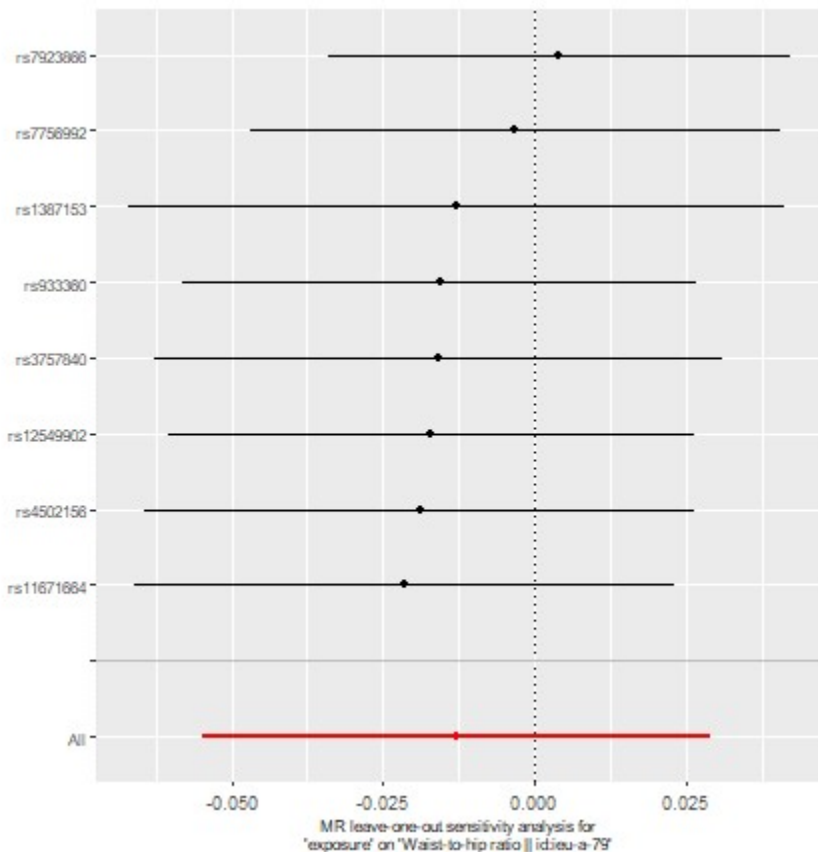

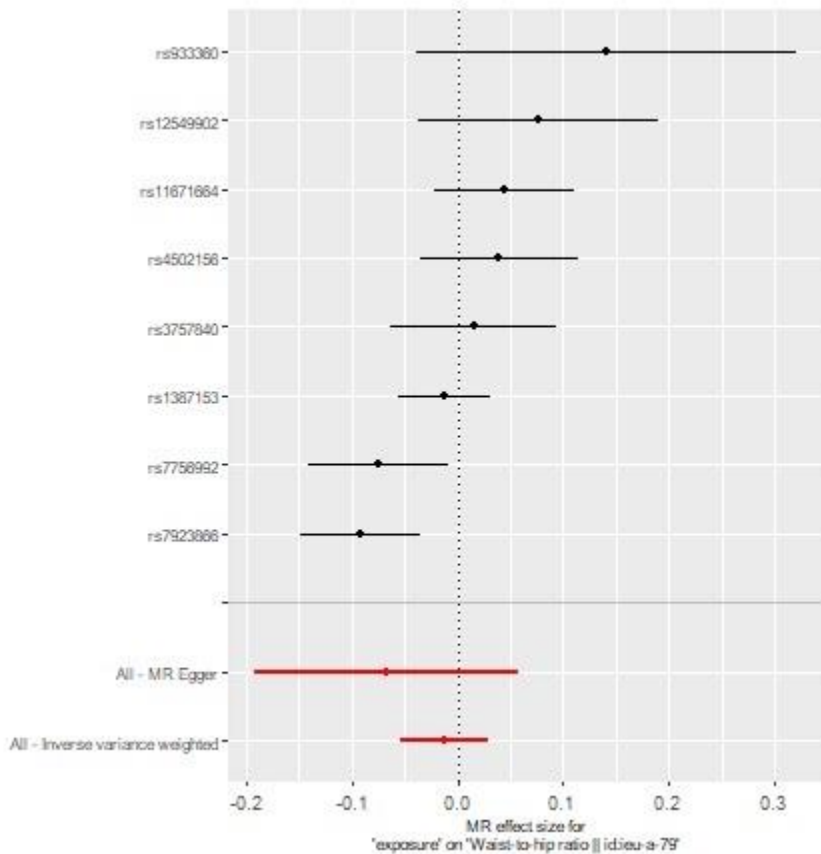

Exposure: Corrected Insulin Response, Outcome: Right Leg Fat Percentage

---

### Results from two sample MR:

| method                    | nsnp | b         | se        | pval      |
|---------------------------|------|-----------|-----------|-----------|
| MR Egger                  | 7    | 0.0963049 | 0.0310484 | 0.0267994 |
| Weighted median           | 7    | 0.0308977 | 0.0080142 | 0.0001156 |
| Inverse variance weighted | 7    | 0.0289189 | 0.0127660 | 0.0234937 |
| Simple mode               | 7    | 0.0324867 | 0.0120228 | 0.0354770 |
| Weighted mode             | 7    | 0.0321854 | 0.0098808 | 0.0173058 |

---

### Heterogeneity tests

| method                    | Q        | Q_df | Q_pval    |
|---------------------------|----------|------|-----------|
| MR Egger                  | 16.24640 | 5    | 0.0061747 |
| Inverse variance weighted | 33.23677 | 6    | 0.0000094 |

---

### Test for directional horizontal pleiotropy

| egger_intercept | se        | pval      |
|-----------------|-----------|-----------|
| -0.0069221      | 0.0030271 | 0.0709419 |

---

# MR Test

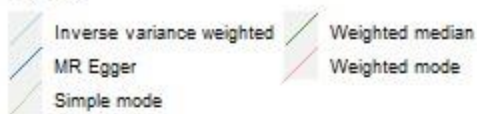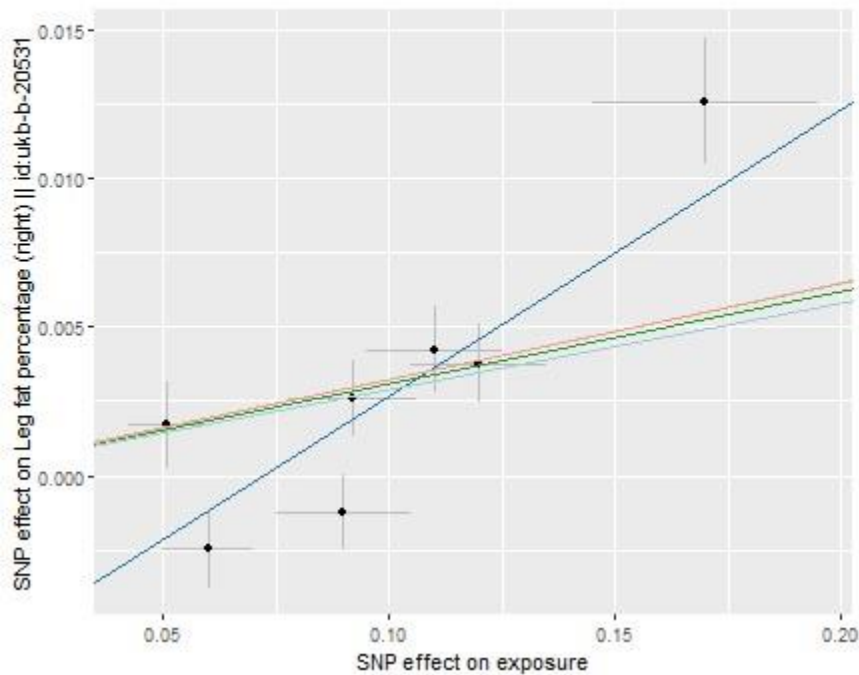

## MR Method

- Inverse variance weighted
- MR Egger

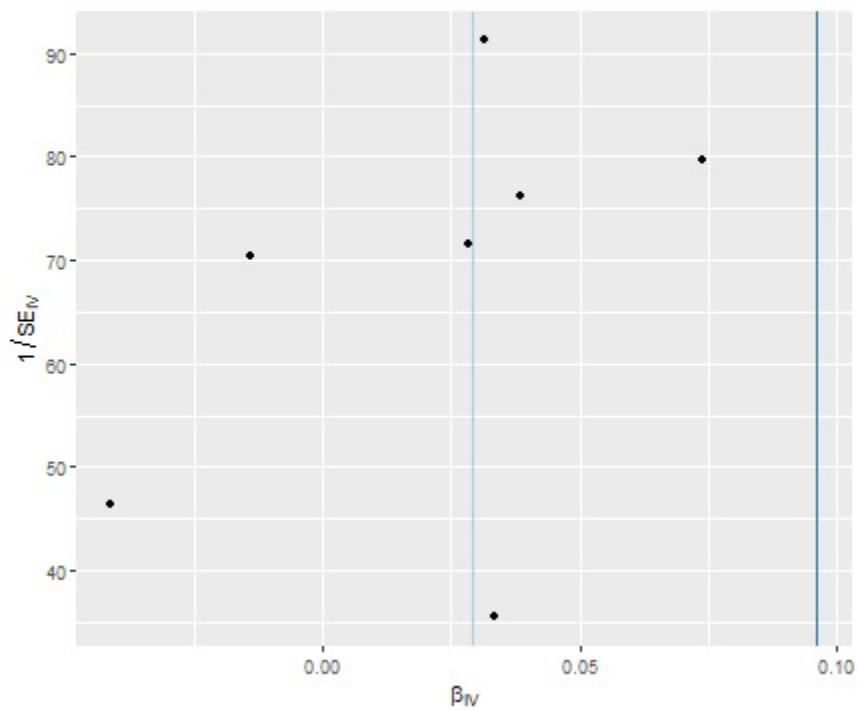

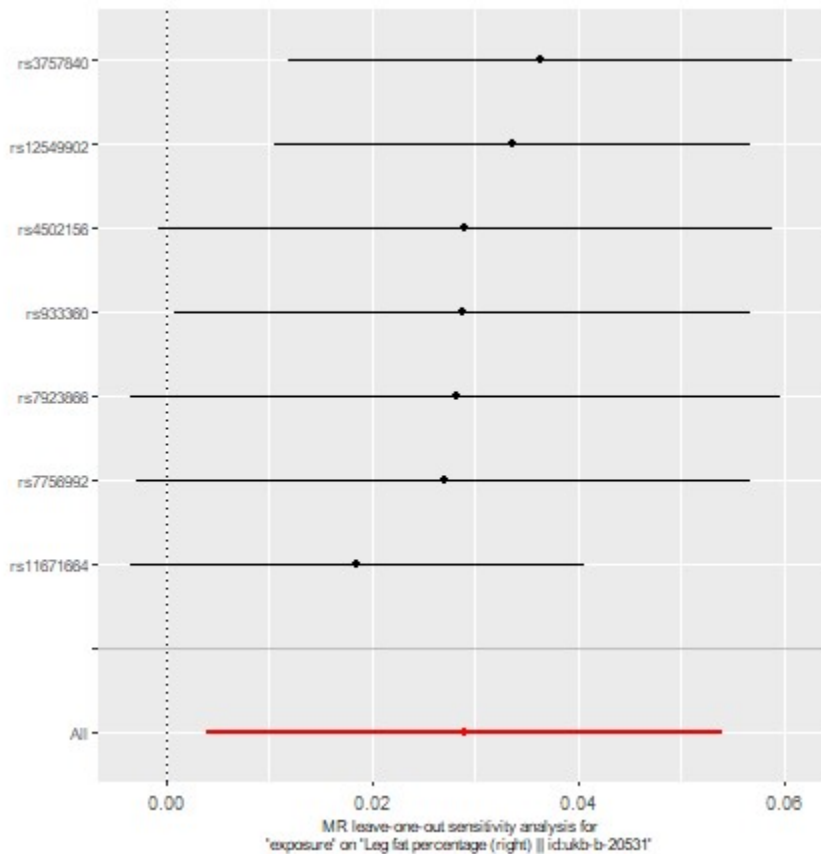

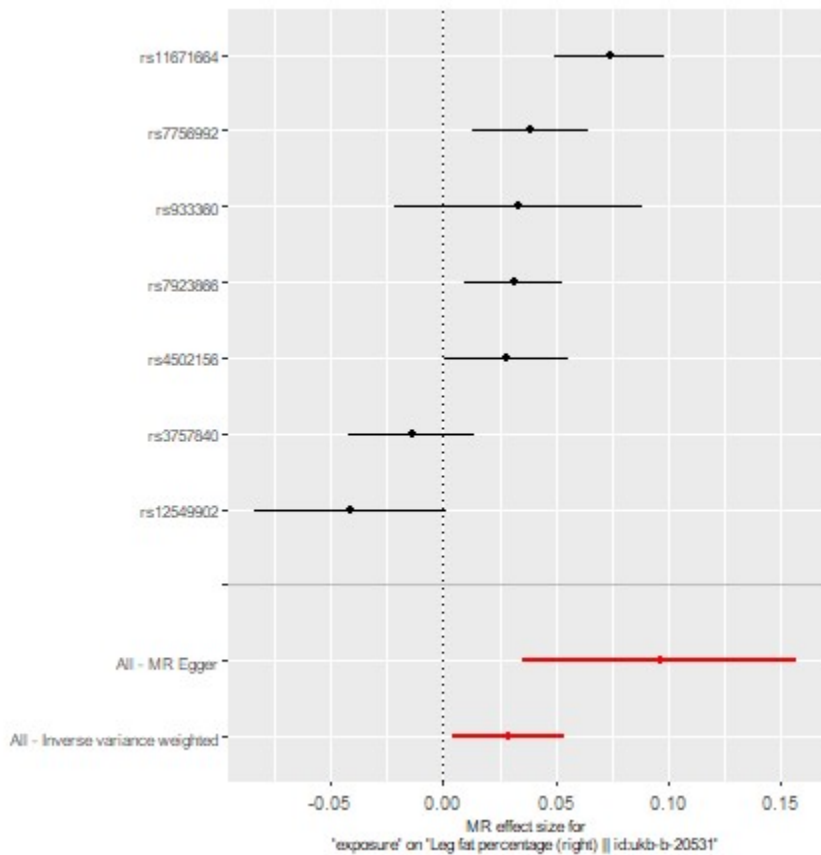

**Exposure: Corrected Insulin Response, Outcome: Liver Fat**

| Method                    | nsnp | beta   | se    | pval  |
|---------------------------|------|--------|-------|-------|
| MR Egger                  | 7    | -0.074 | 0.141 | 0.621 |
| Weighted median           | 7    | -0.041 | 0.05  | 0.405 |
| Inverse variance weighted | 7    | -0.076 | 0.04  | 0.06  |
| Simple mode               | 7    | -0.026 | 0.07  | 0.723 |
| Weighted mode             | 7    | -0.026 | 0.064 | 0.7   |

## Heterogeneity tests:

| Method                    | Q    | Q_df | Q_pval |
|---------------------------|------|------|--------|
| MR Egger                  | 7.39 | 5    | 0.193  |
| Inverse variance weighted | 7.39 | 6    | 0.286  |

## Test for directional horizontal pleiotropy:

| Egger_intercept | se    | pval |
|-----------------|-------|------|
| -0.00019        | 0.014 | 0.98 |



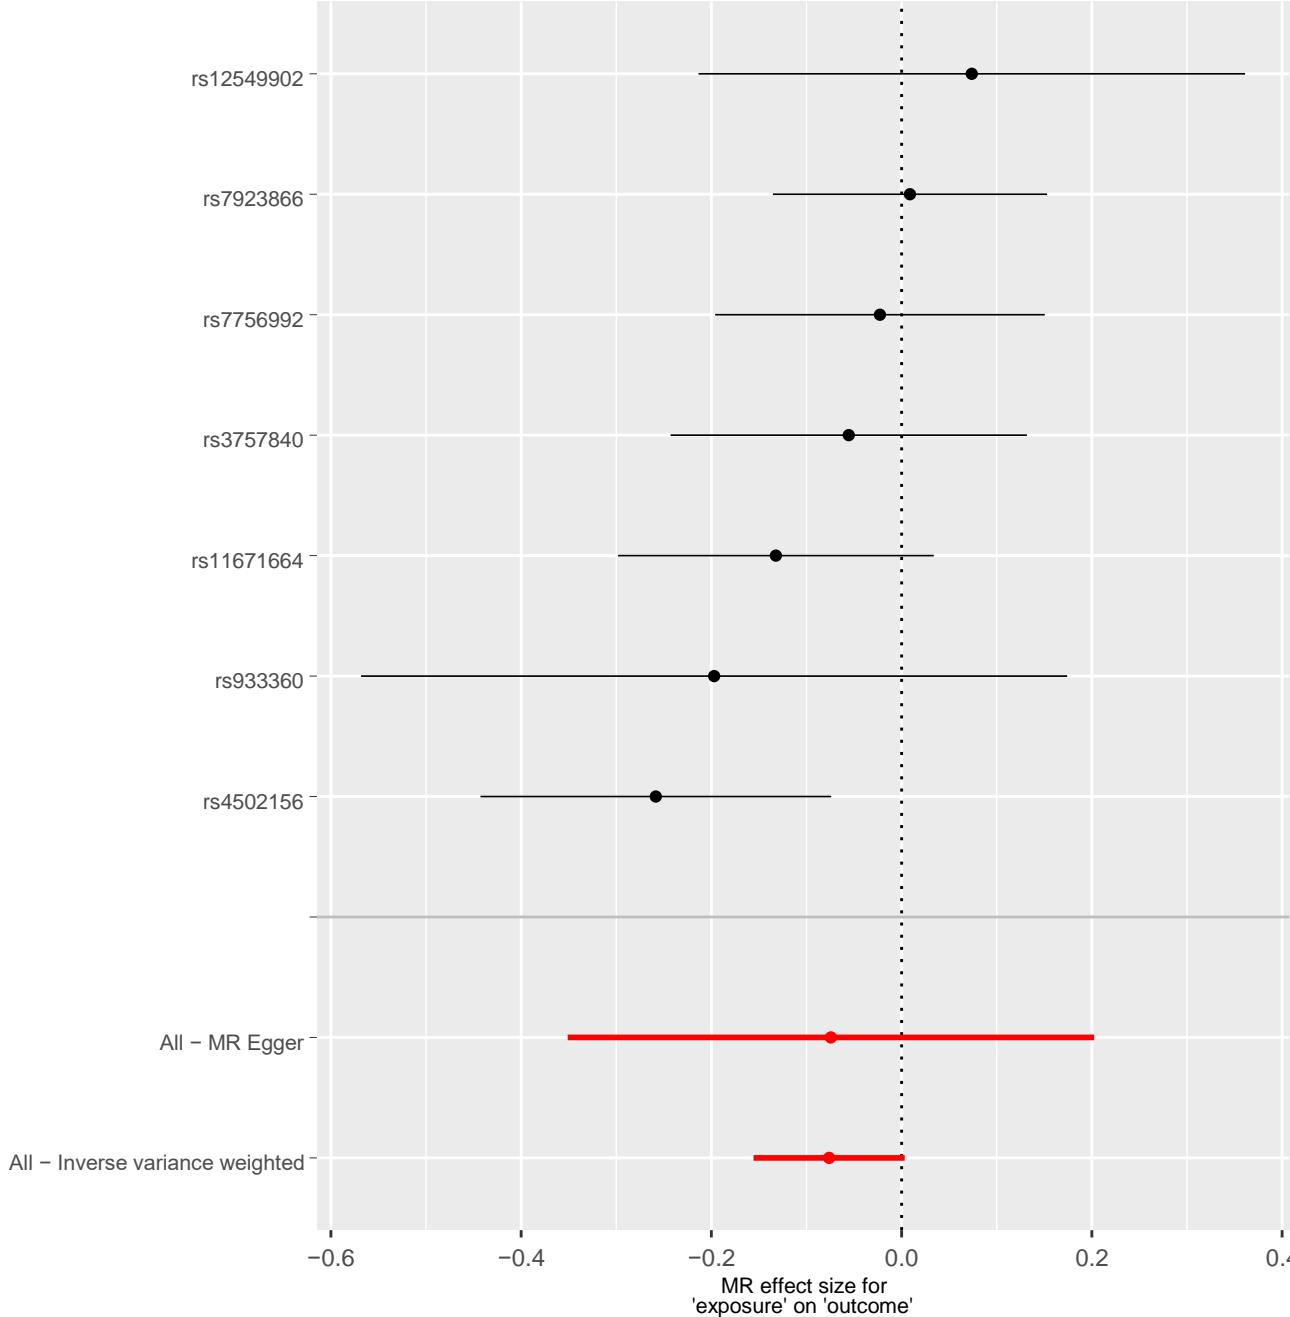

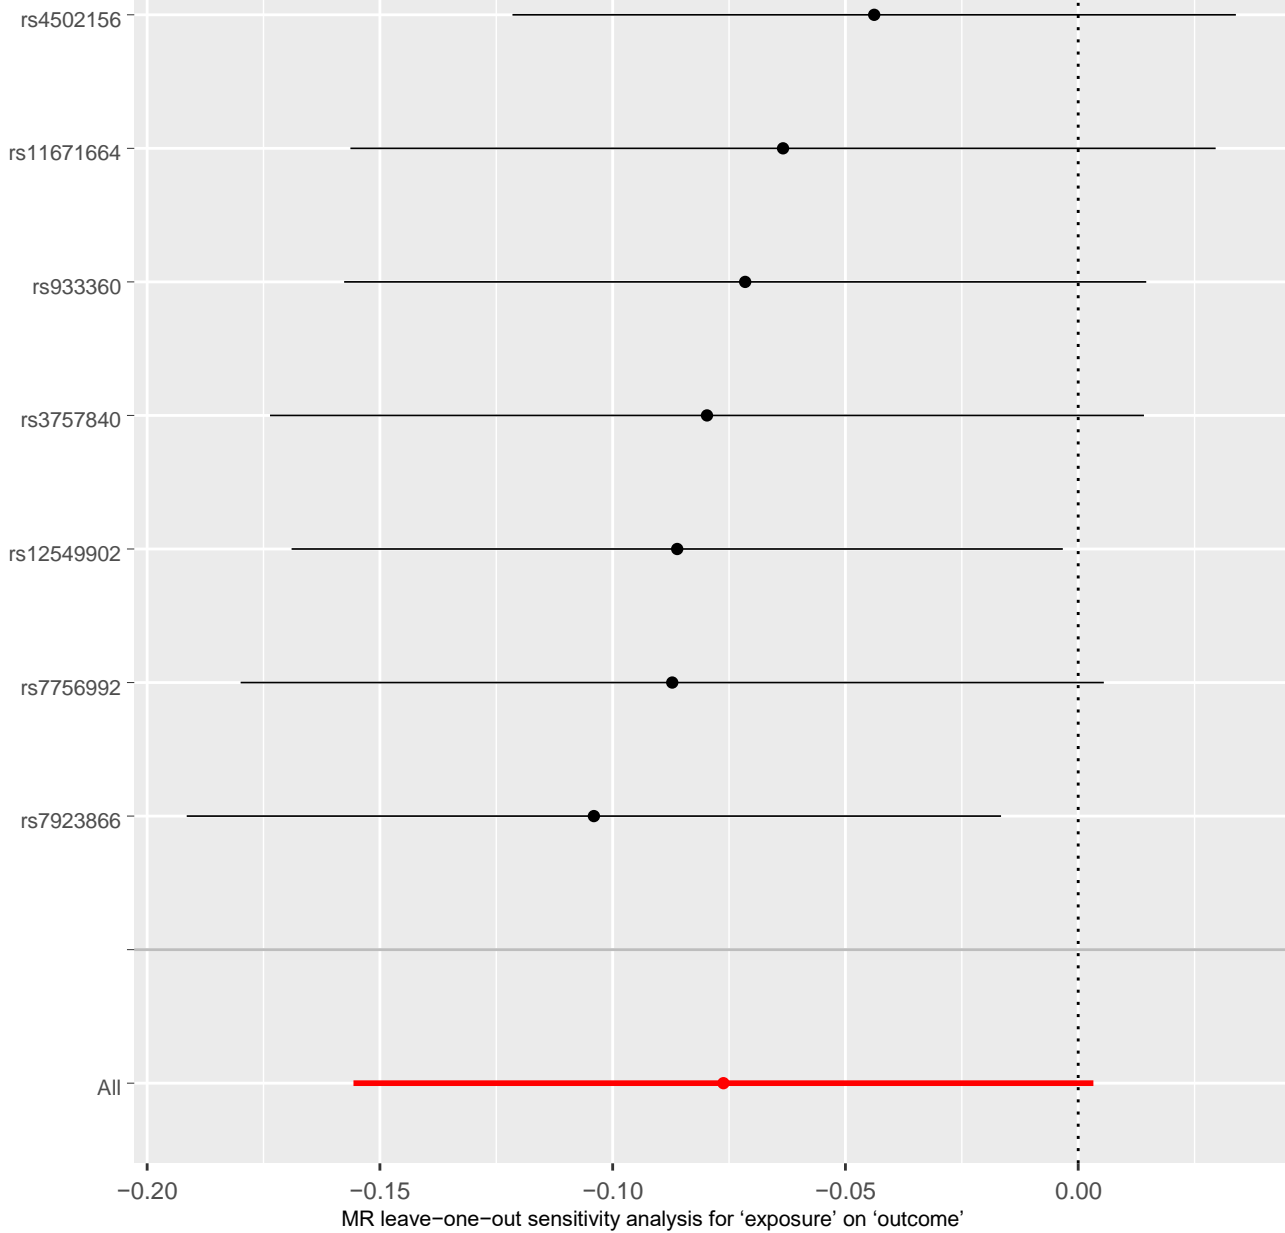

# MR Method

- Inverse variance weighted
- MR Egger

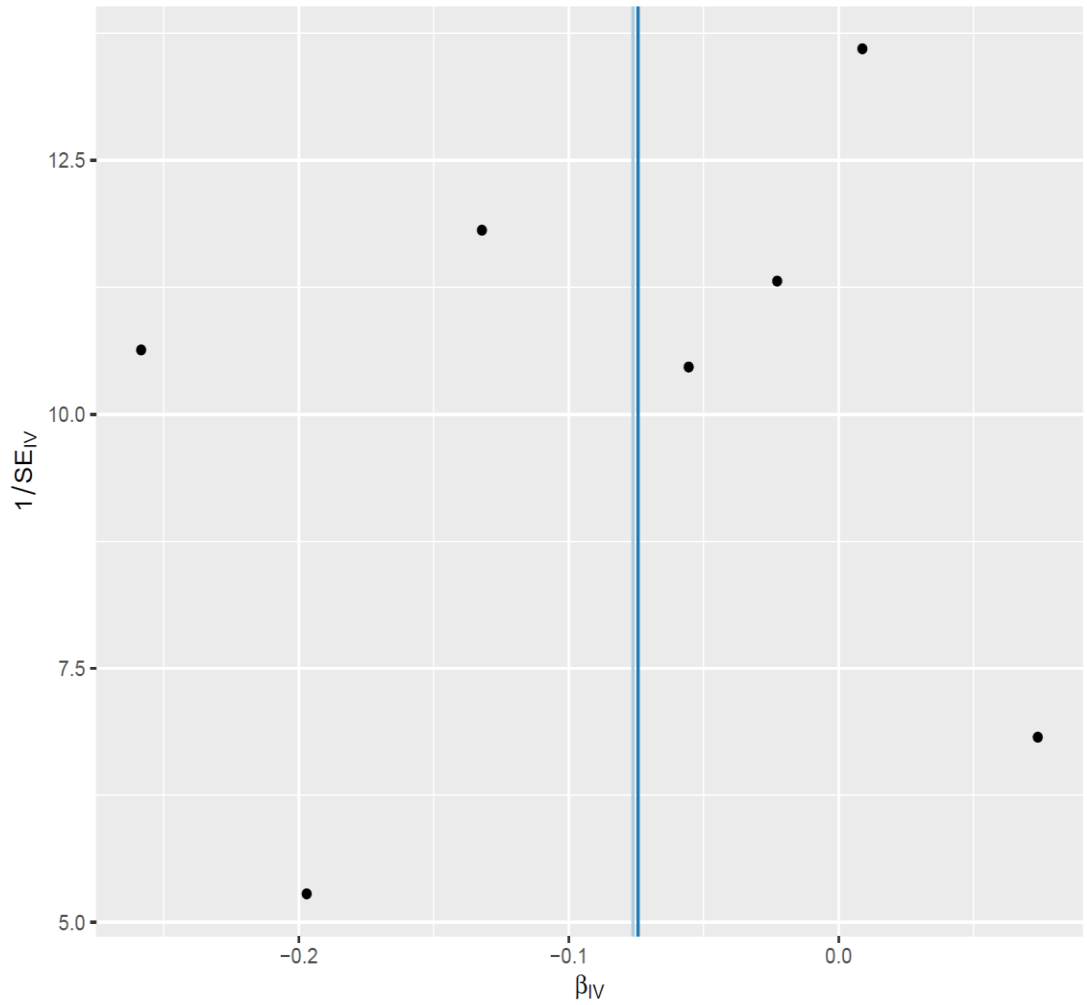

# MR Test

- Inverse variance weighted
- MR Egger
- Simple mode
- Weighted median
- Weighted mode

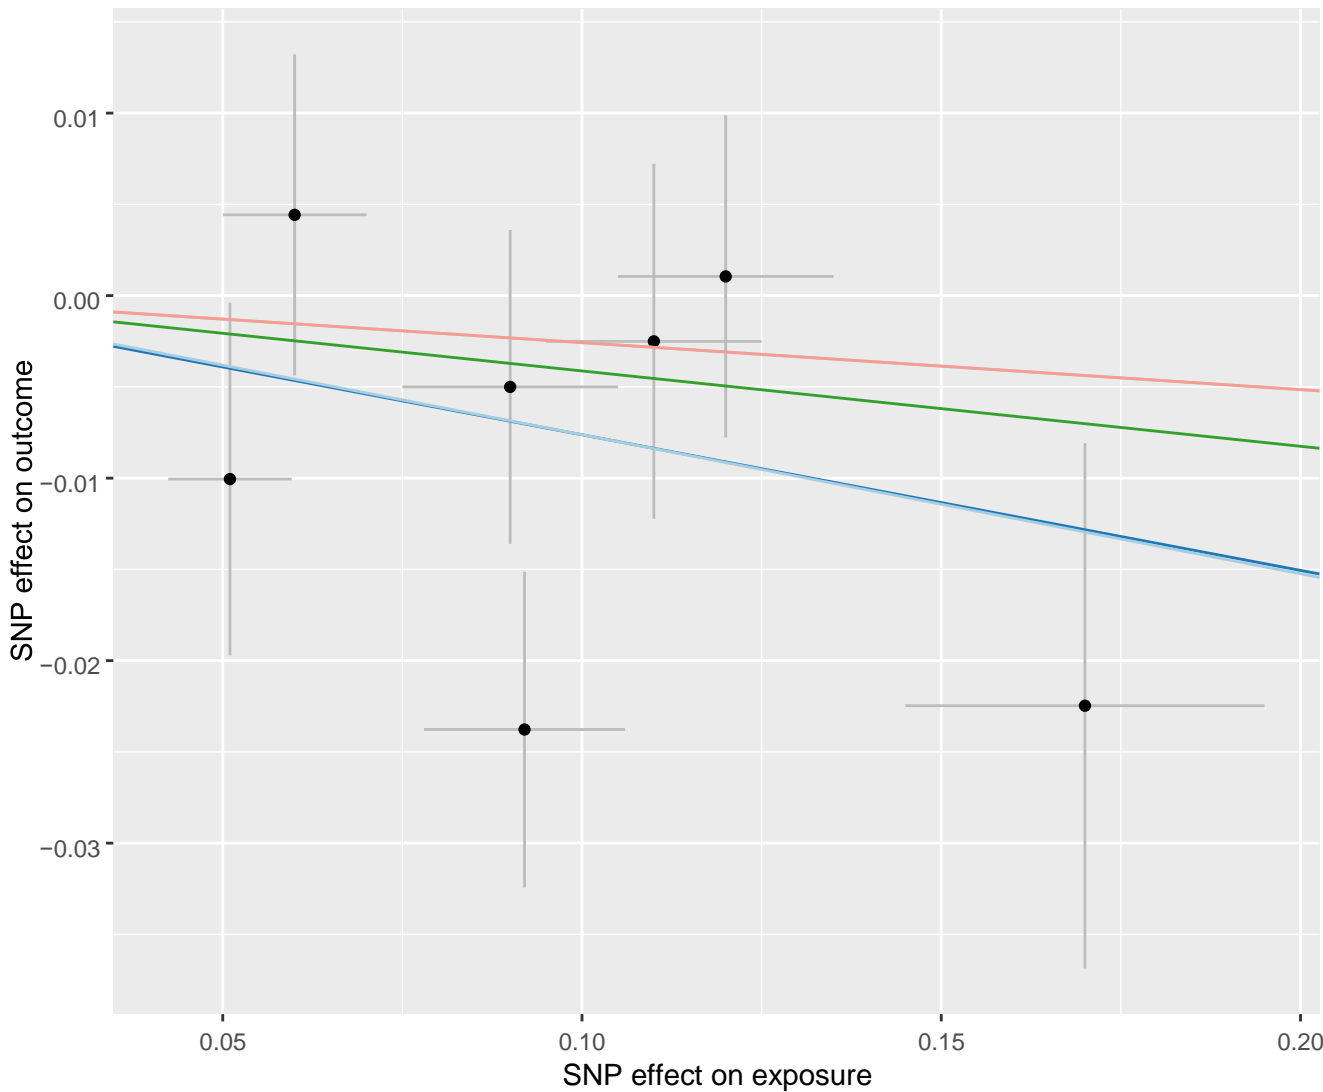

Exposure: Corrected Insulin Response, Outcome: Hypertension

---

### Results from two sample MR:

| method                    | nsnp | b          | se        | pval      |
|---------------------------|------|------------|-----------|-----------|
| MR Egger                  | 7    | 0.0029412  | 0.0154000 | 0.8560500 |
| Weighted median           | 7    | -0.0023705 | 0.0043531 | 0.5860614 |
| Inverse variance weighted | 7    | -0.0014397 | 0.0044674 | 0.7472460 |
| Simple mode               | 7    | -0.0026606 | 0.0067889 | 0.7086691 |
| Weighted mode             | 7    | -0.0031927 | 0.0076392 | 0.6905387 |

---

### Heterogeneity tests

| method                    | Q        | Q_df | Q_pval    |
|---------------------------|----------|------|-----------|
| MR Egger                  | 14.70558 | 5    | 0.0116973 |
| Inverse variance weighted | 14.96980 | 6    | 0.0204929 |

---

### Test for directional horizontal pleiotropy

| egger_intercept | se        | pval      |
|-----------------|-----------|-----------|
| -0.0004501      | 0.0015016 | 0.7764451 |

---

## MR Test

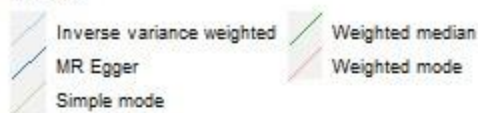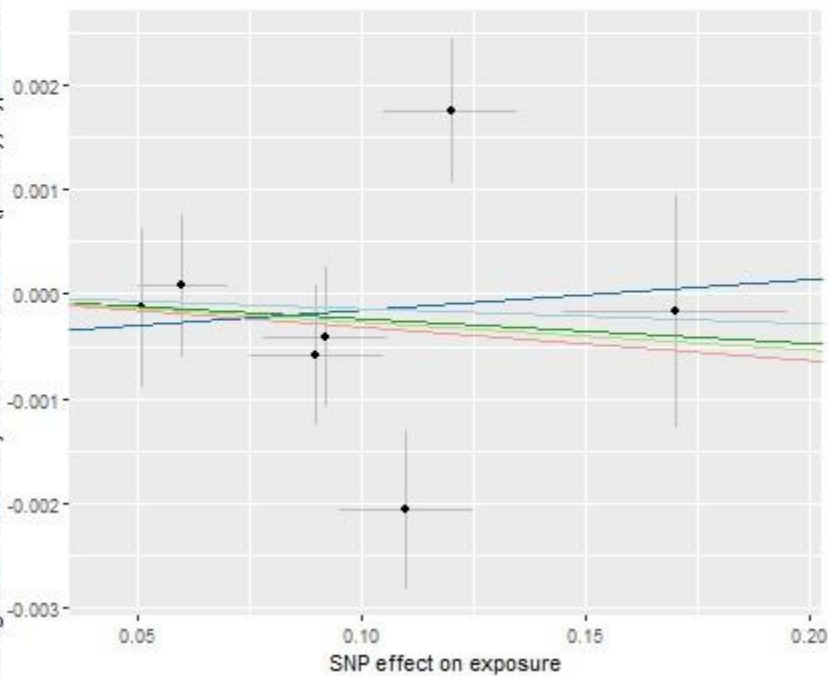

## MR Method

- Inverse variance weighted
- MR Egger

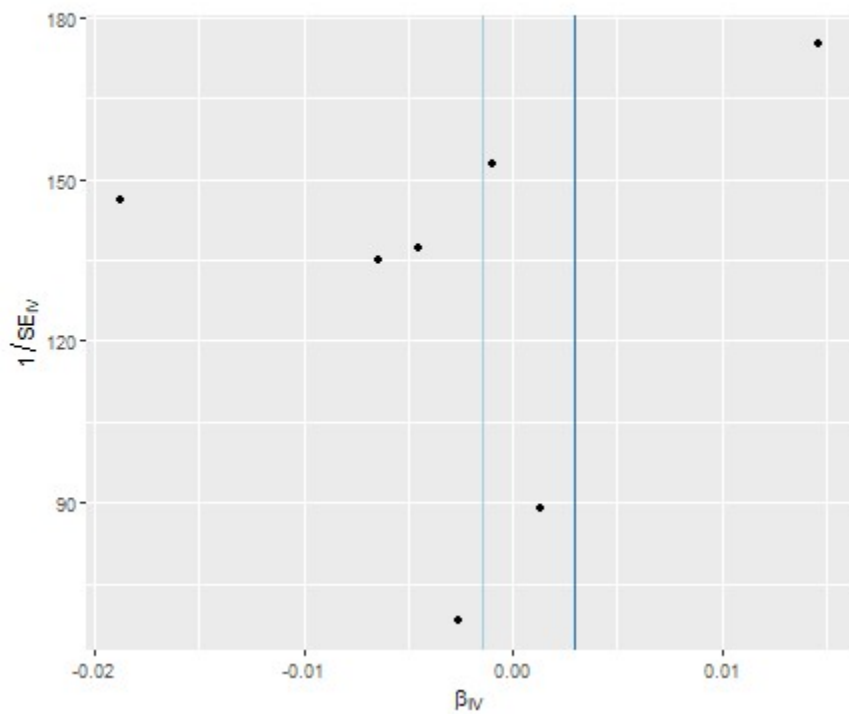

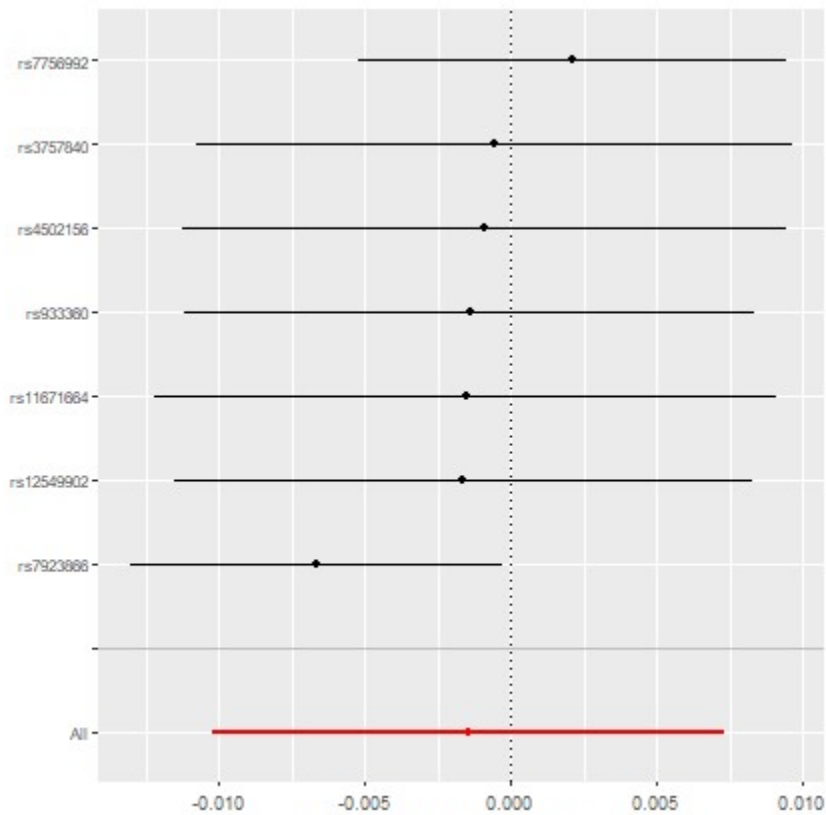



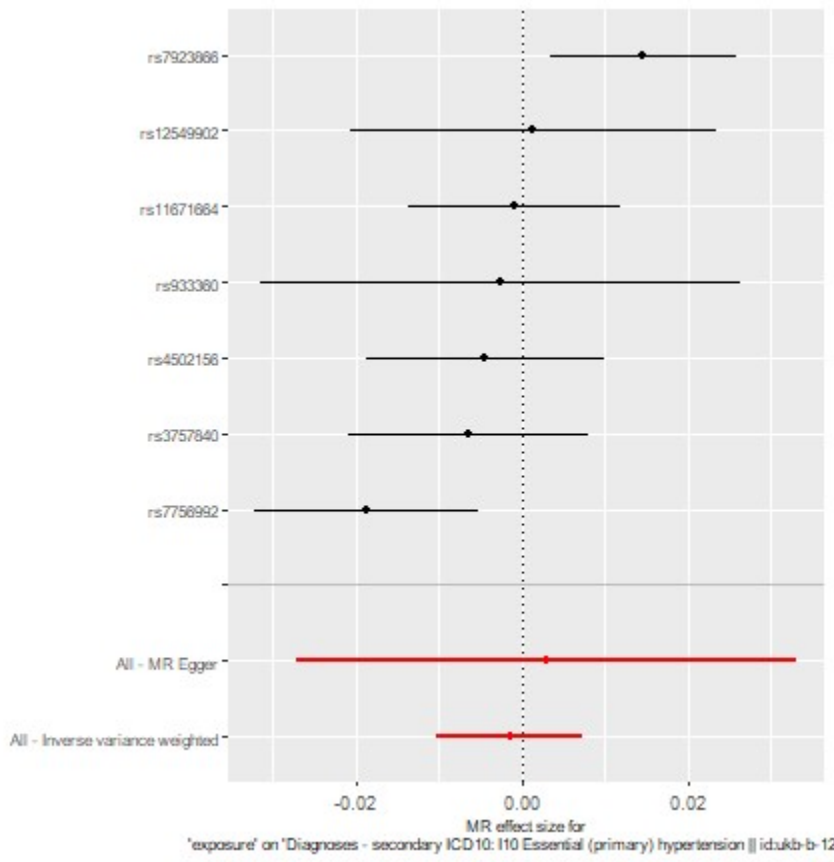

Exposure: Corrected Insulin Response, Outcome: Systolic Blood Pressure

---

### Results from two sample MR:

| method                    | nsnp | b          | se        | pval      |
|---------------------------|------|------------|-----------|-----------|
| MR Egger                  | 7    | -2.2430229 | 1.3158998 | 0.1489994 |
| Weighted median           | 7    | -0.2343501 | 0.2532287 | 0.3547327 |
| Inverse variance weighted | 7    | -0.5365593 | 0.4438628 | 0.2267242 |
| Simple mode               | 7    | 0.6986504  | 0.6607231 | 0.3310306 |
| Weighted mode             | 7    | 0.1286353  | 0.3593088 | 0.7325956 |

---

### Heterogeneity tests

| method                    | Q        | Q_df | Q_pval |
|---------------------------|----------|------|--------|
| MR Egger                  | 52.25330 | 5    | 0      |
| Inverse variance weighted | 71.76807 | 6    | 0      |

---

### Test for directional horizontal pleiotropy

| egger_intercept | se        | pval      |
|-----------------|-----------|-----------|
| 0.1755021       | 0.1284318 | 0.2300257 |

---

# MR Test

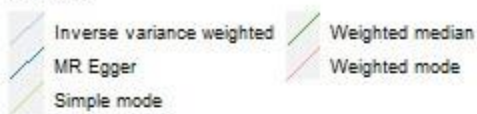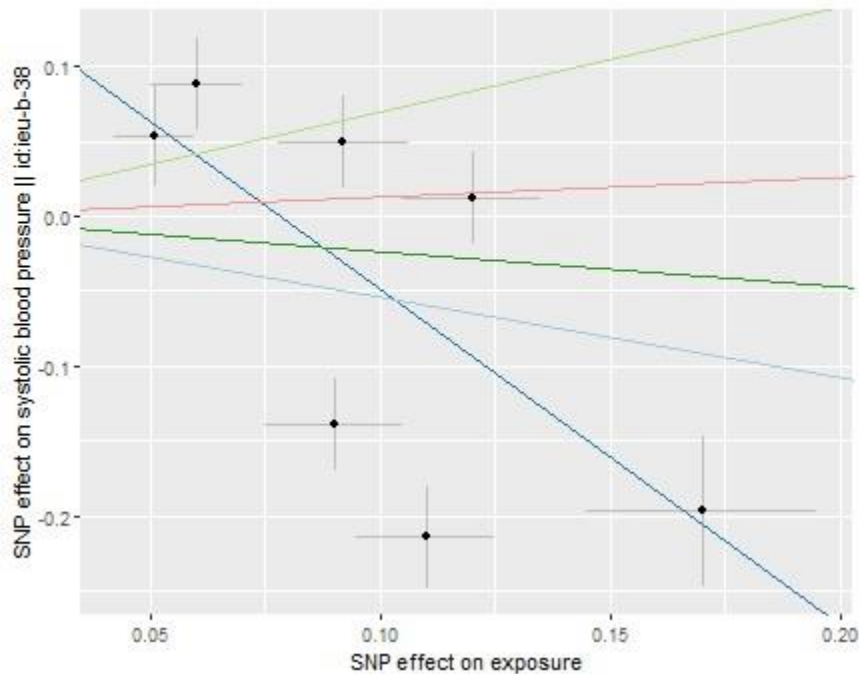

## MR Method

- Inverse variance weighted
- MR Egger

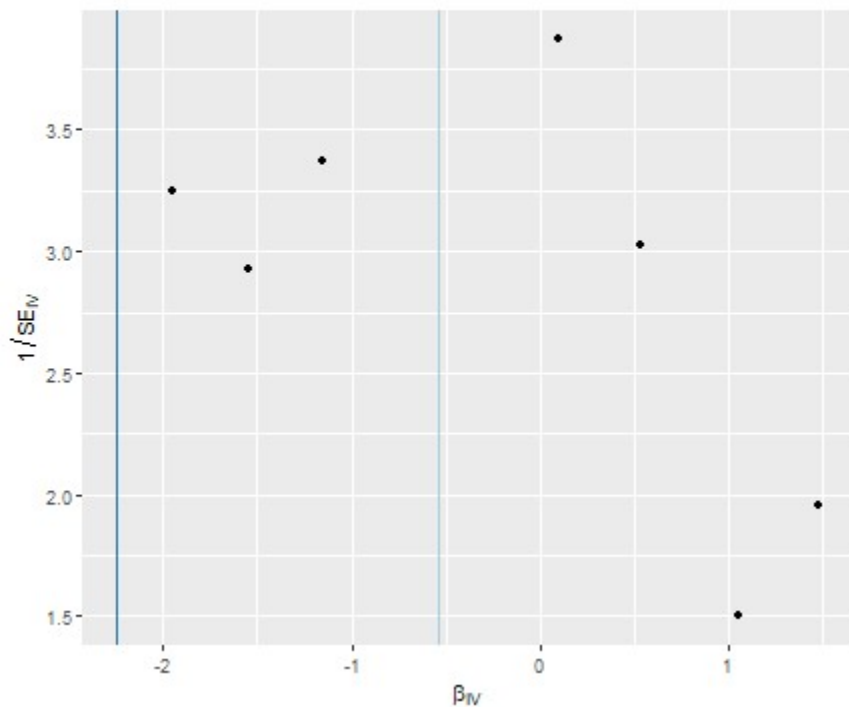

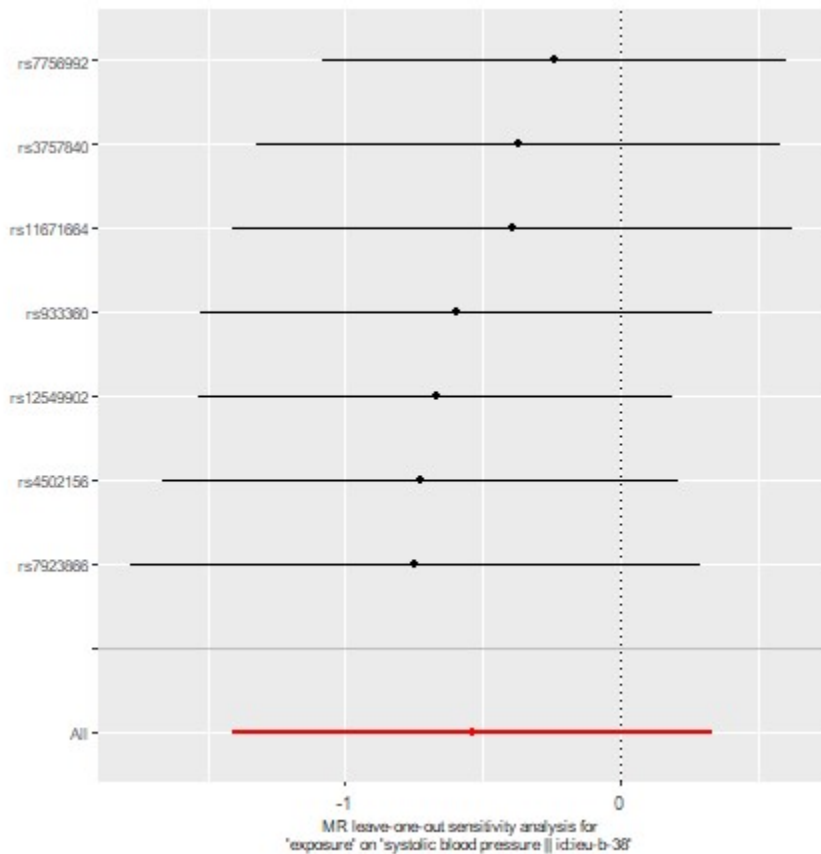

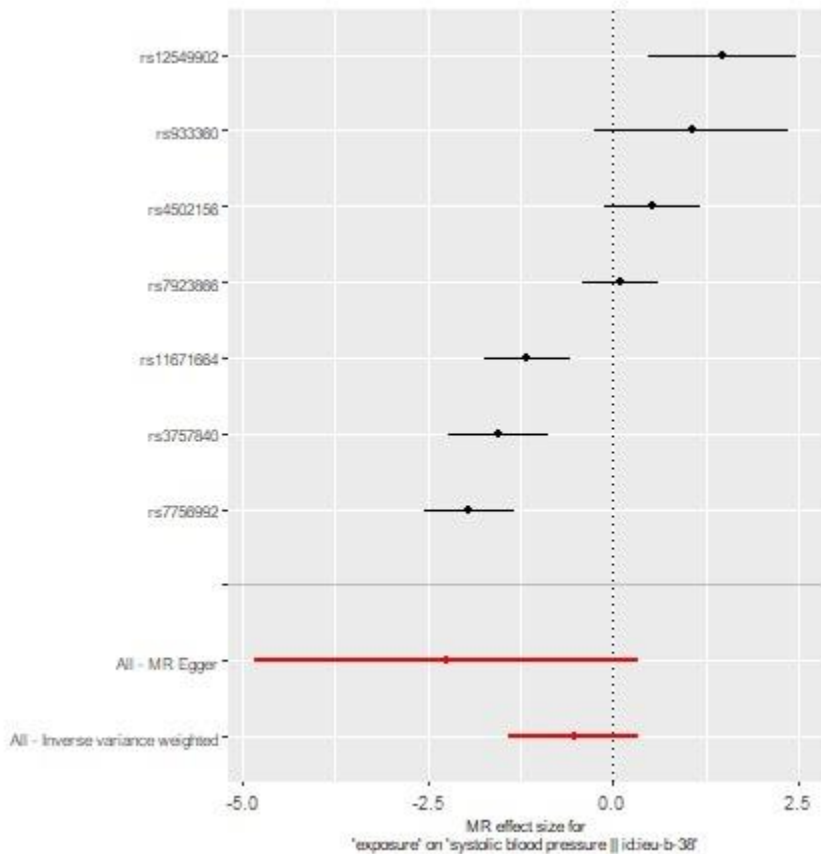

Exposure: Corrected Insulin Response, Outcome: Diastolic Blood Pressure

---

### Results from two sample MR:

| method                    | nsnp | b          | se        | pval      |
|---------------------------|------|------------|-----------|-----------|
| MR Egger                  | 7    | -0.4564535 | 0.7074576 | 0.5472303 |
| Weighted median           | 7    | -0.0933277 | 0.1209776 | 0.4404425 |
| Inverse variance weighted | 7    | -0.1135097 | 0.2088032 | 0.5867027 |
| Simple mode               | 7    | -0.0523889 | 0.1868643 | 0.7886184 |
| Weighted mode             | 7    | -0.0842812 | 0.1578549 | 0.6125922 |

---

### Heterogeneity tests

| method                    | Q        | Q_df | Q_pval |
|---------------------------|----------|------|--------|
| MR Egger                  | 45.65820 | 5    | 0      |
| Inverse variance weighted | 48.04072 | 6    | 0      |

---

### Test for directional horizontal pleiotropy

| egger_intercept | se        | pval      |
|-----------------|-----------|-----------|
| 0.0352329       | 0.0689769 | 0.6312429 |

---

# MR Test

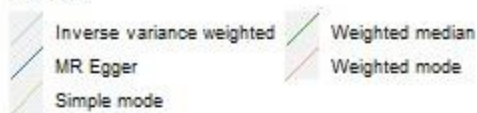

SNP effect on diastolic blood pressure || id:ieu-b-39

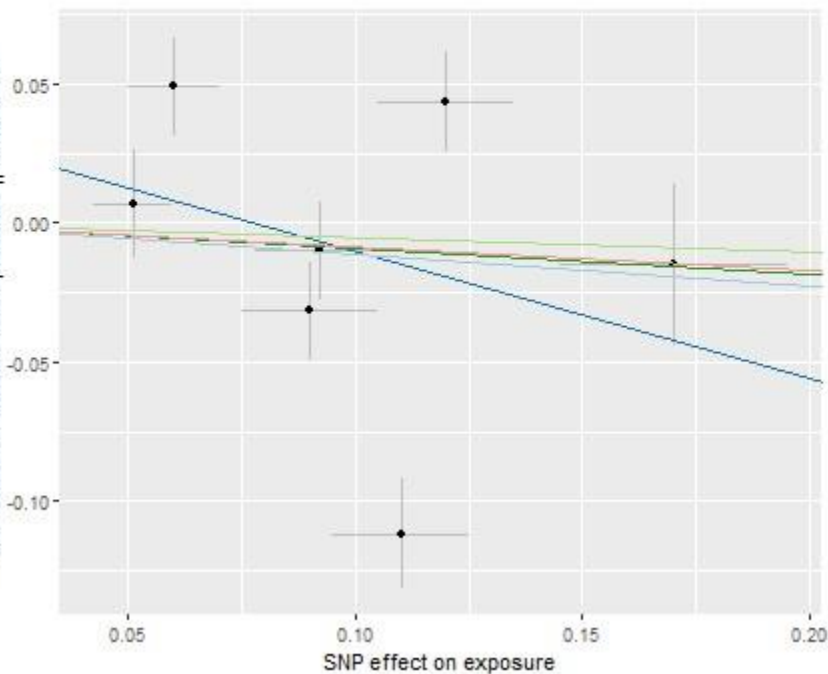



# MR Method

- Inverse variance weighted
- MR Egger

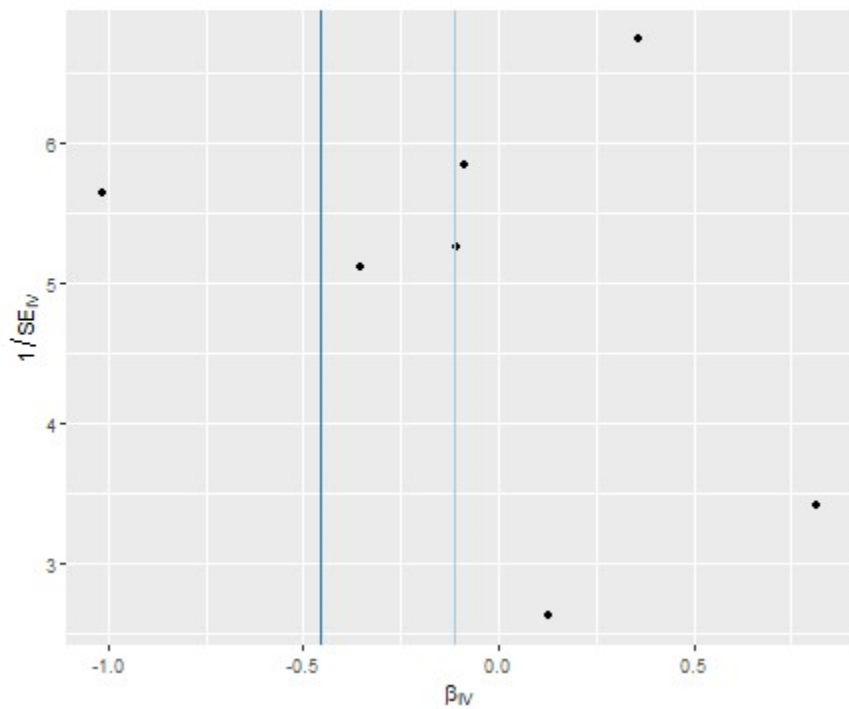

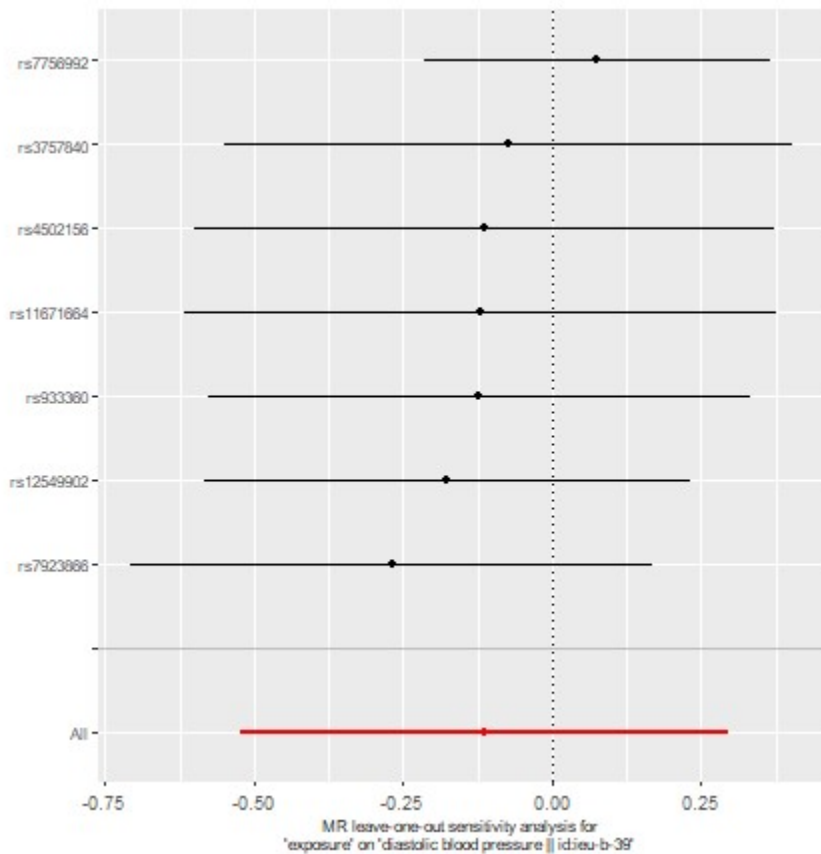

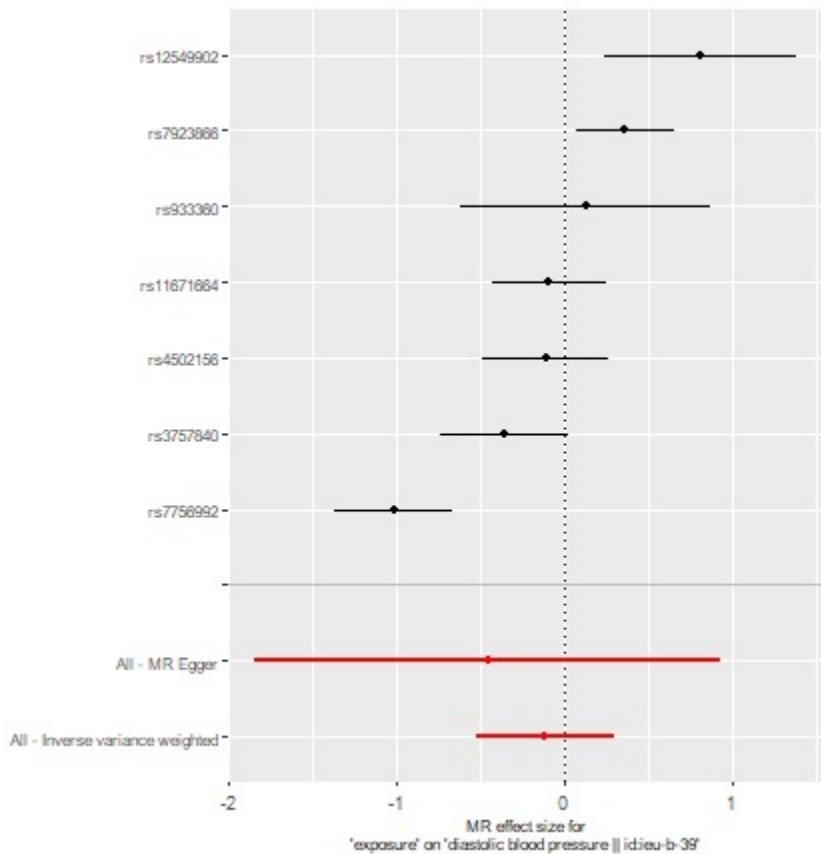

Exposure: Corrected Insulin Response, Outcome: Coronary Artery Disease

---

### Results from two sample MR:

| method                    | nsnp | b          | se        | pval      |
|---------------------------|------|------------|-----------|-----------|
| MR Egger                  | 7    | -0.0225323 | 0.3474347 | 0.9508038 |
| Weighted median           | 7    | -0.0409994 | 0.0956883 | 0.6683102 |
| Inverse variance weighted | 7    | -0.0091031 | 0.0998871 | 0.9273860 |
| Simple mode               | 7    | -0.1839868 | 0.2037766 | 0.4013794 |
| Weighted mode             | 7    | -0.1699464 | 0.1231637 | 0.2168506 |

---

### Heterogeneity tests

| method                    | Q        | Q_df | Q_pval    |
|---------------------------|----------|------|-----------|
| MR Egger                  | 14.78573 | 5    | 0.0113182 |
| Inverse variance weighted | 14.79063 | 6    | 0.0219491 |

---

### Test for directional horizontal pleiotropy

| egger_intercept | se        | pval     |
|-----------------|-----------|----------|
| 0.0013708       | 0.0336602 | 0.969092 |

---

# MR Test

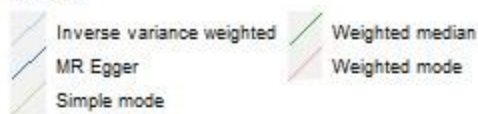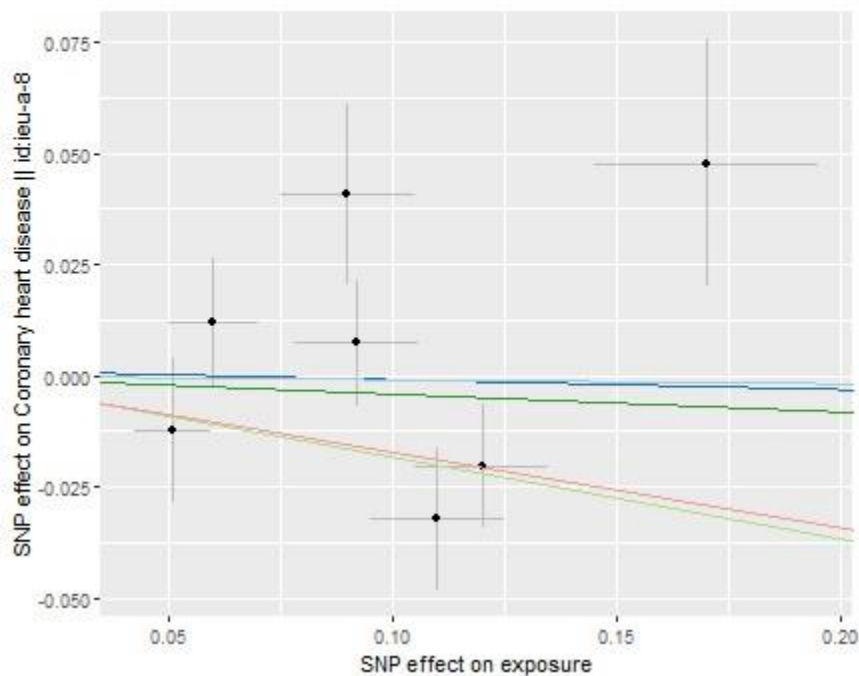

MR Method

- Inverse variance weighted
- MR Egger

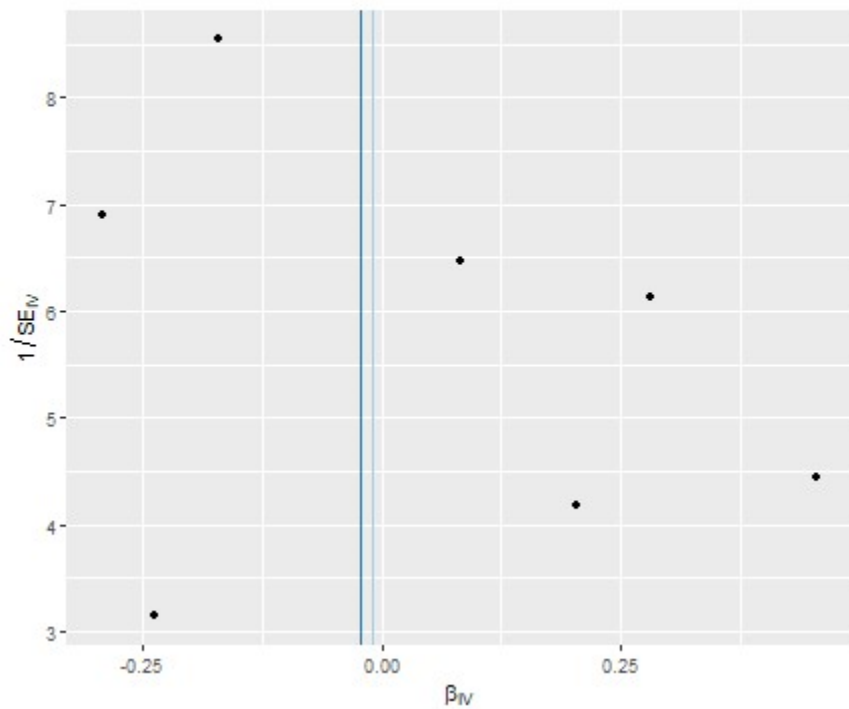

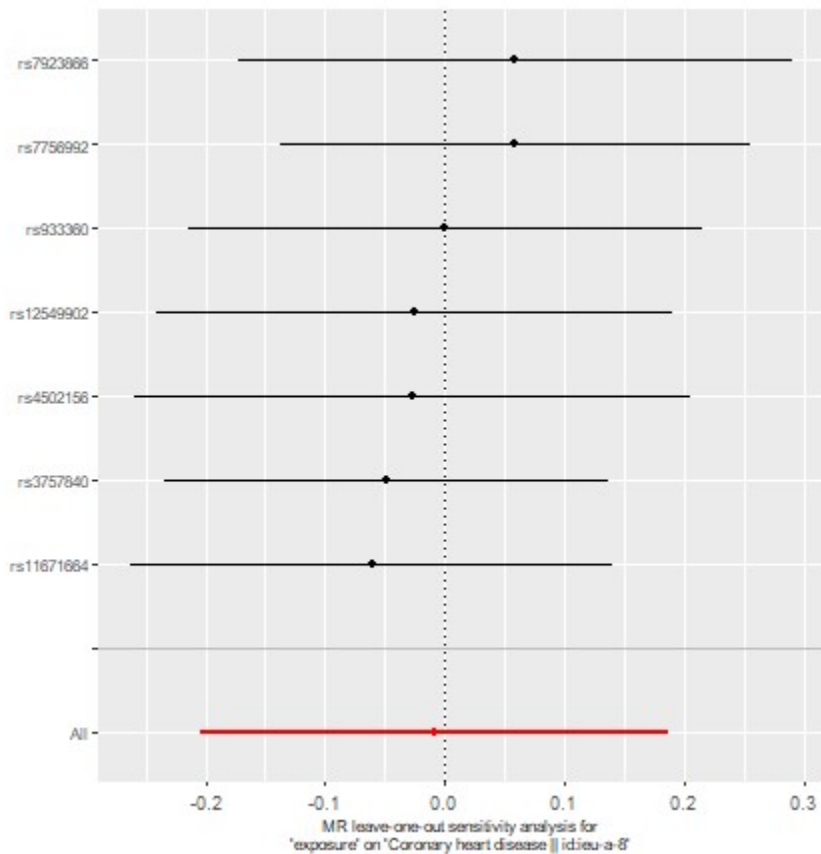

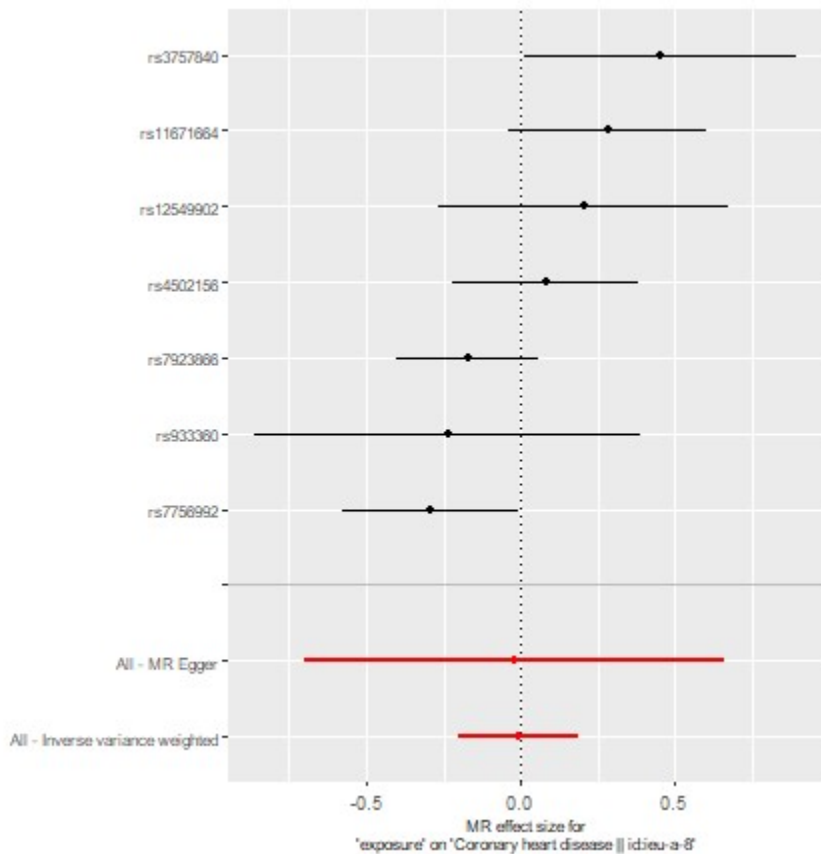



Exposure: Corrected Insulin Response, Outcome: Major Coronary Heart Disease Event

---

### Results from two sample MR:

| method                    | nsnp | b          | se        | pval      |
|---------------------------|------|------------|-----------|-----------|
| MR Egger                  | 7    | -0.0108608 | 0.0093130 | 0.2961308 |
| Weighted median           | 7    | -0.0040163 | 0.0025176 | 0.1106519 |
| Inverse variance weighted | 7    | -0.0020739 | 0.0029300 | 0.4790536 |
| Simple mode               | 7    | -0.0047685 | 0.0047456 | 0.3537661 |
| Weighted mode             | 7    | -0.0062940 | 0.0034029 | 0.1138593 |

---

### Heterogeneity tests

| method                    | Q        | Q_df | Q_pval    |
|---------------------------|----------|------|-----------|
| MR Egger                  | 16.03256 | 5    | 0.0067517 |
| Inverse variance weighted | 19.20126 | 6    | 0.0038369 |

---

### Test for directional horizontal pleiotropy

| egger_intercept | se        | pval      |
|-----------------|-----------|-----------|
| 0.000902        | 0.0009074 | 0.3658237 |

---

# MR Test



SNP effect on Major coronary heart disease event || id:ukb-d-19\_CHD

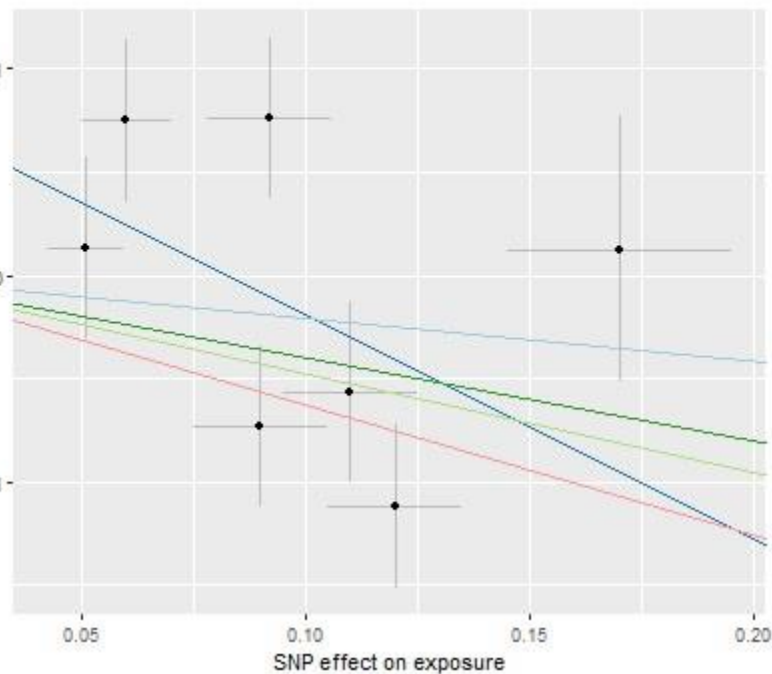

## MR Method

- Inverse variance weighted
- MR Egger

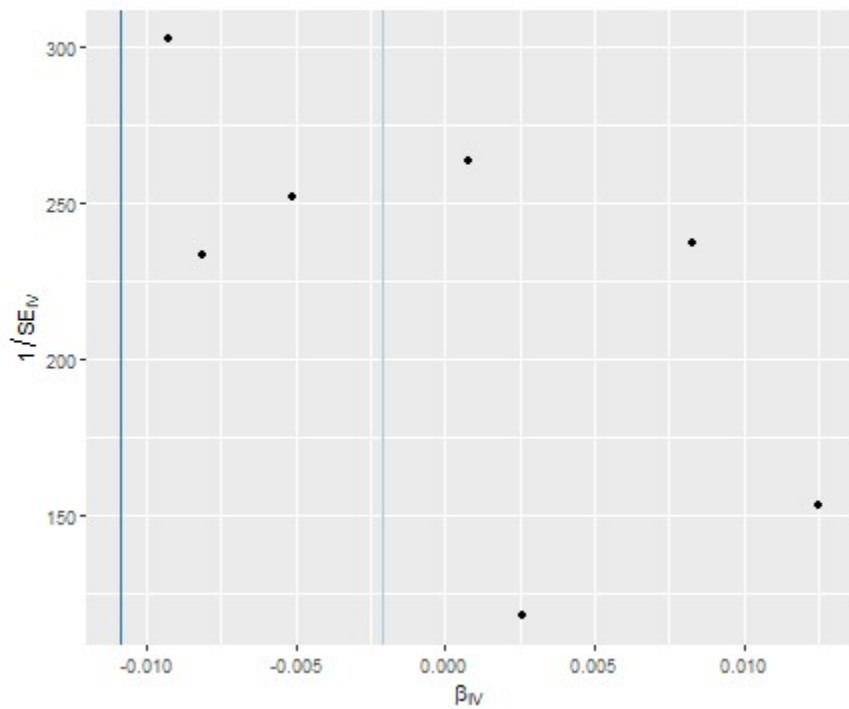

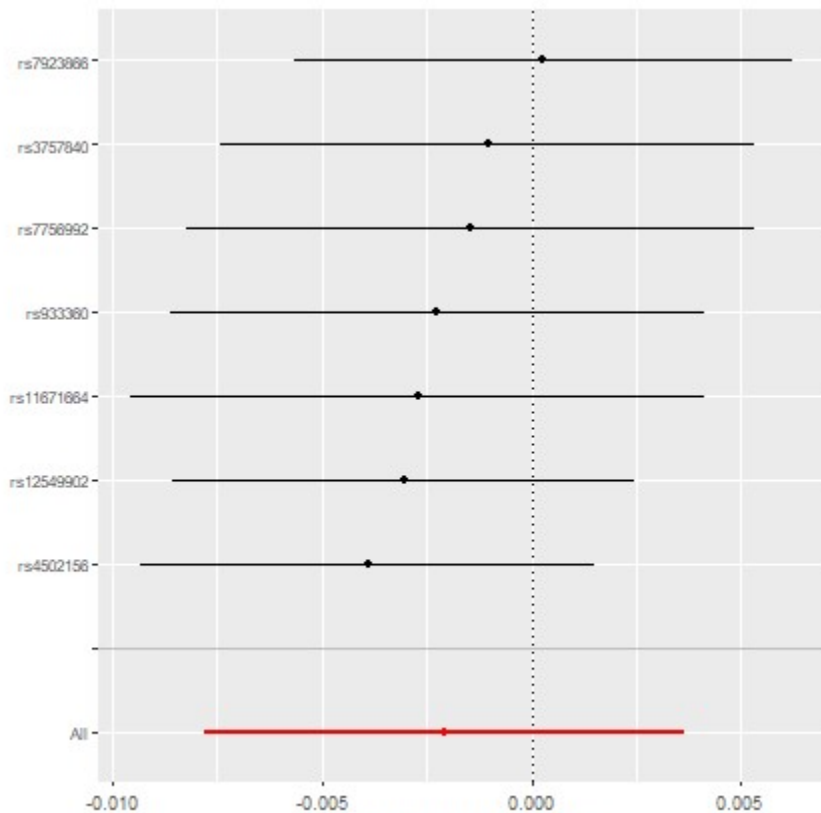

MR leave-one-out sensitivity analysis for  
'exposure' on 'Major coronary heart disease event ||| icd10b-d-19\_CHD'

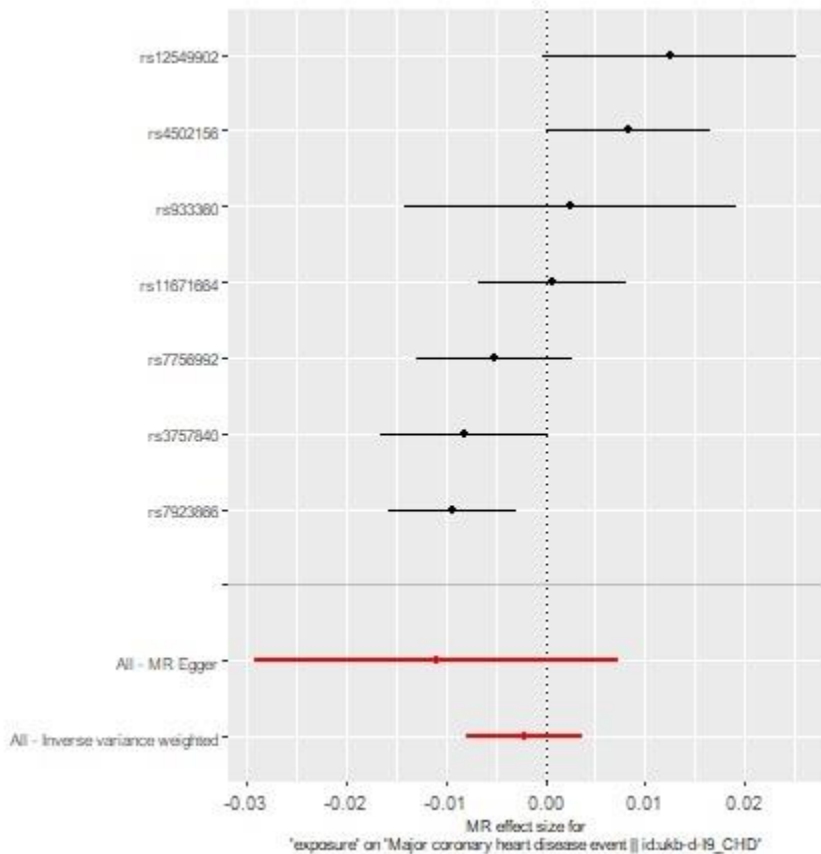

Supplement: Supplementary file 5 [file 2]
