# Supplementary material
Source: publisher figshare collection journal article supplement (https://diabetesjournals.figshare.com/articles/dataset/_/20112998)

Supplementary File 3 — Exposure: CIRadjISI, Outcome: Anthropometric and Metabolic Traits

**Exposure: Corrected Insulin Response adjusted for ISI, Outcome: Body Mass Index**  
**Figures of Forest Plot, Comparison of Different MR Methods, Funnel Plot and Leave-one-out Sensitivity Analysis**

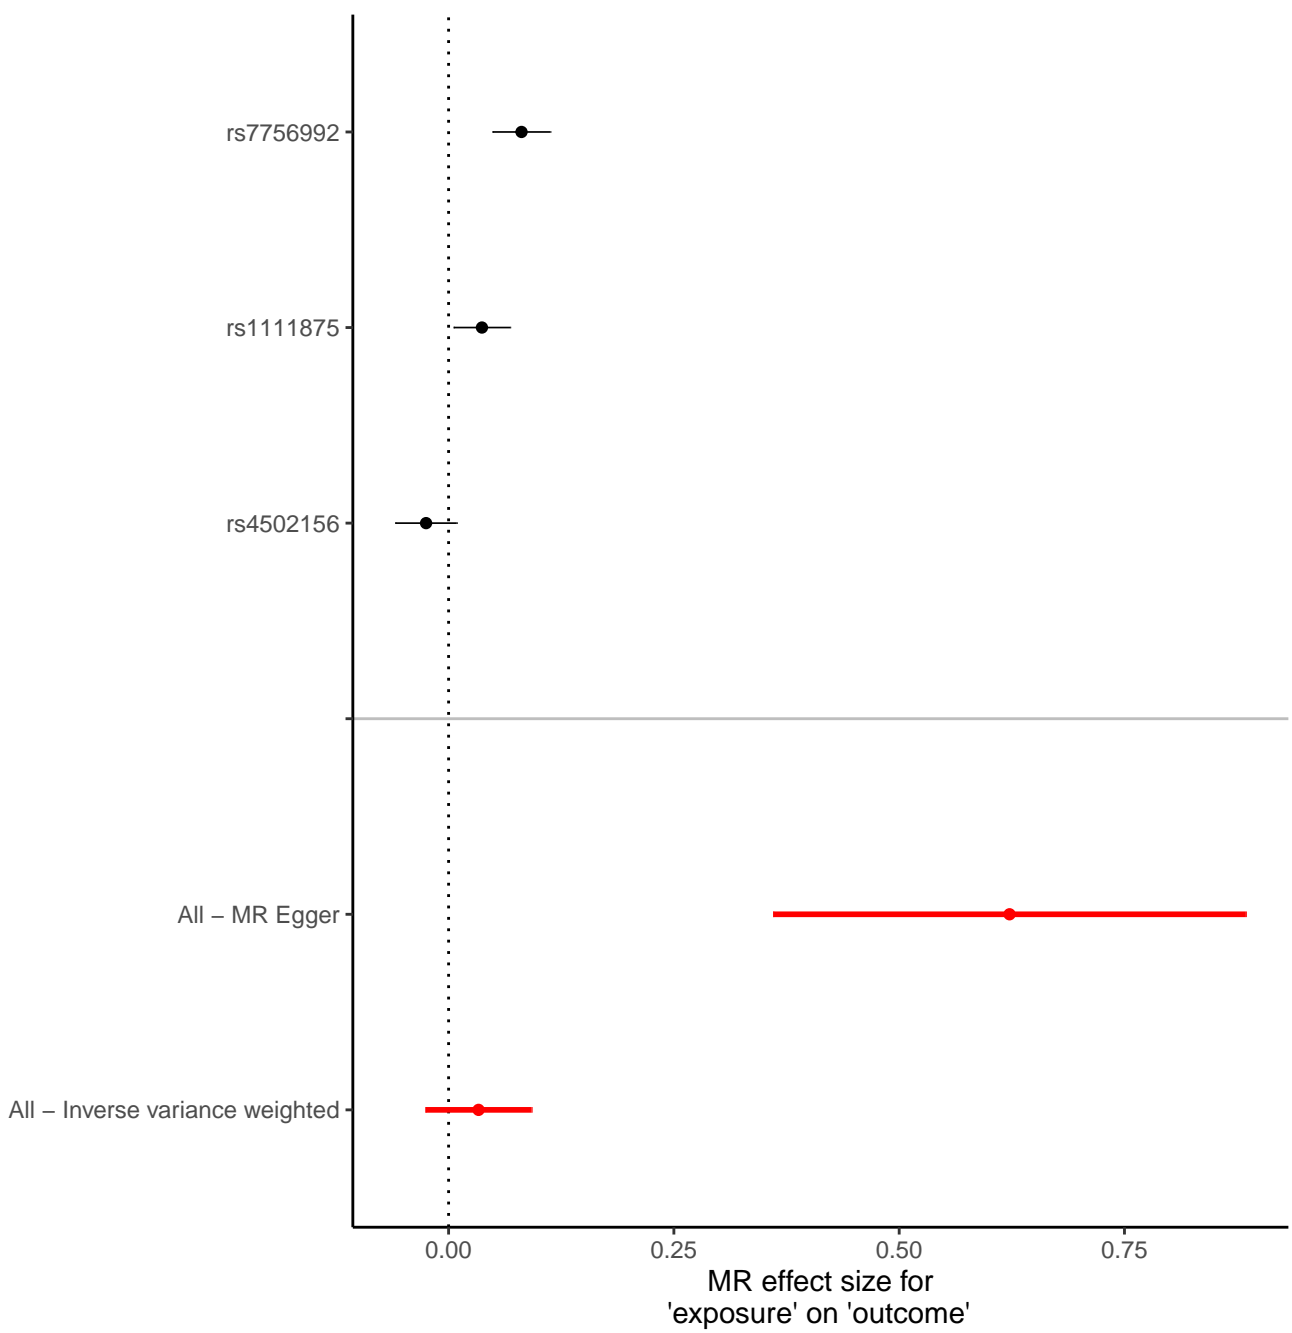

MR Test

- Inverse variance weighted
- MR Egger
- Simple mode
- Weighted median
- Weighted mode

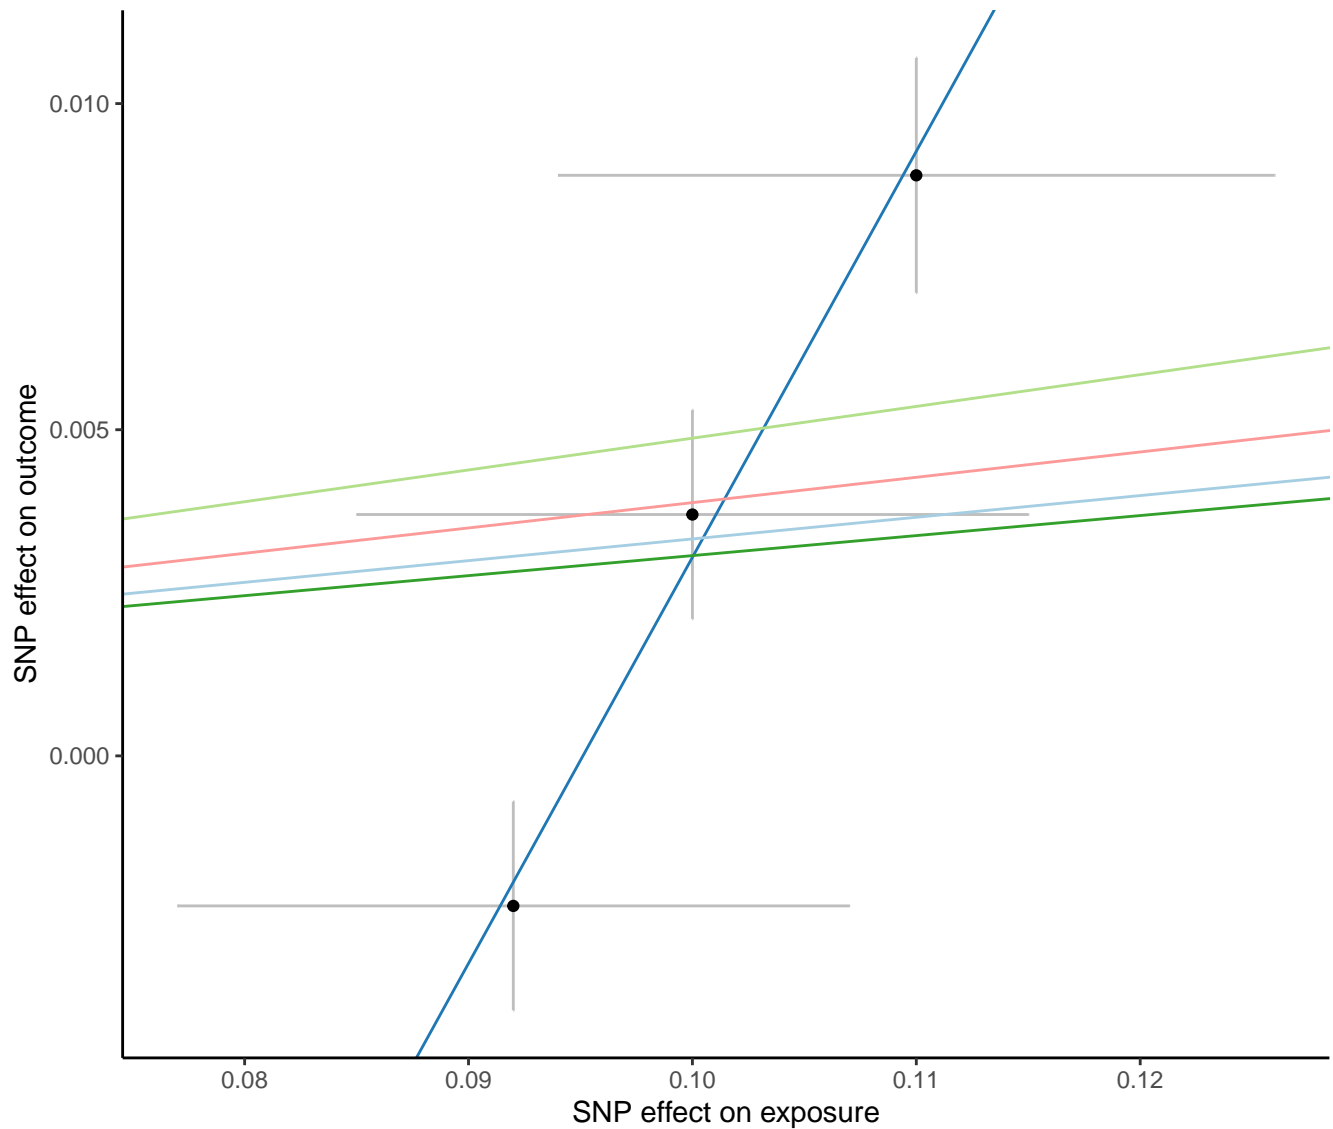

MR Method

Inverse variance weighted

MR Egger

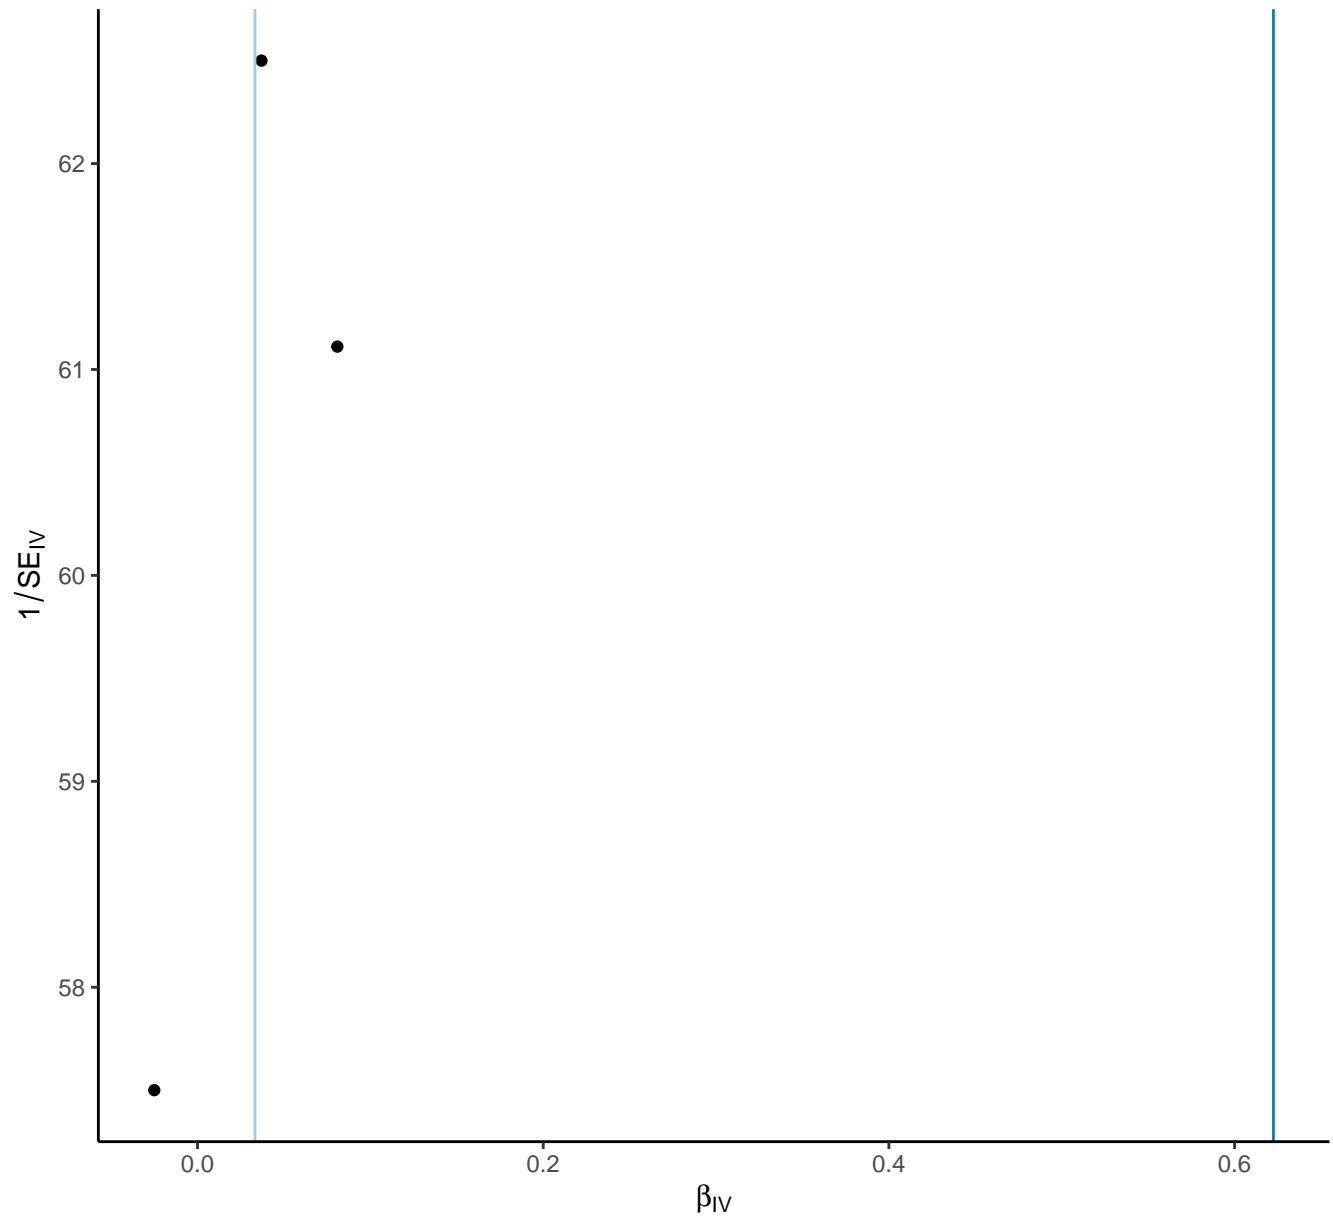

rs4502156

rs1111875

rs7756992

All

-0.05

0.00

0.05

0.10

MR leave-one-out sensitivity analysis for  
'exposure' on 'outcome'

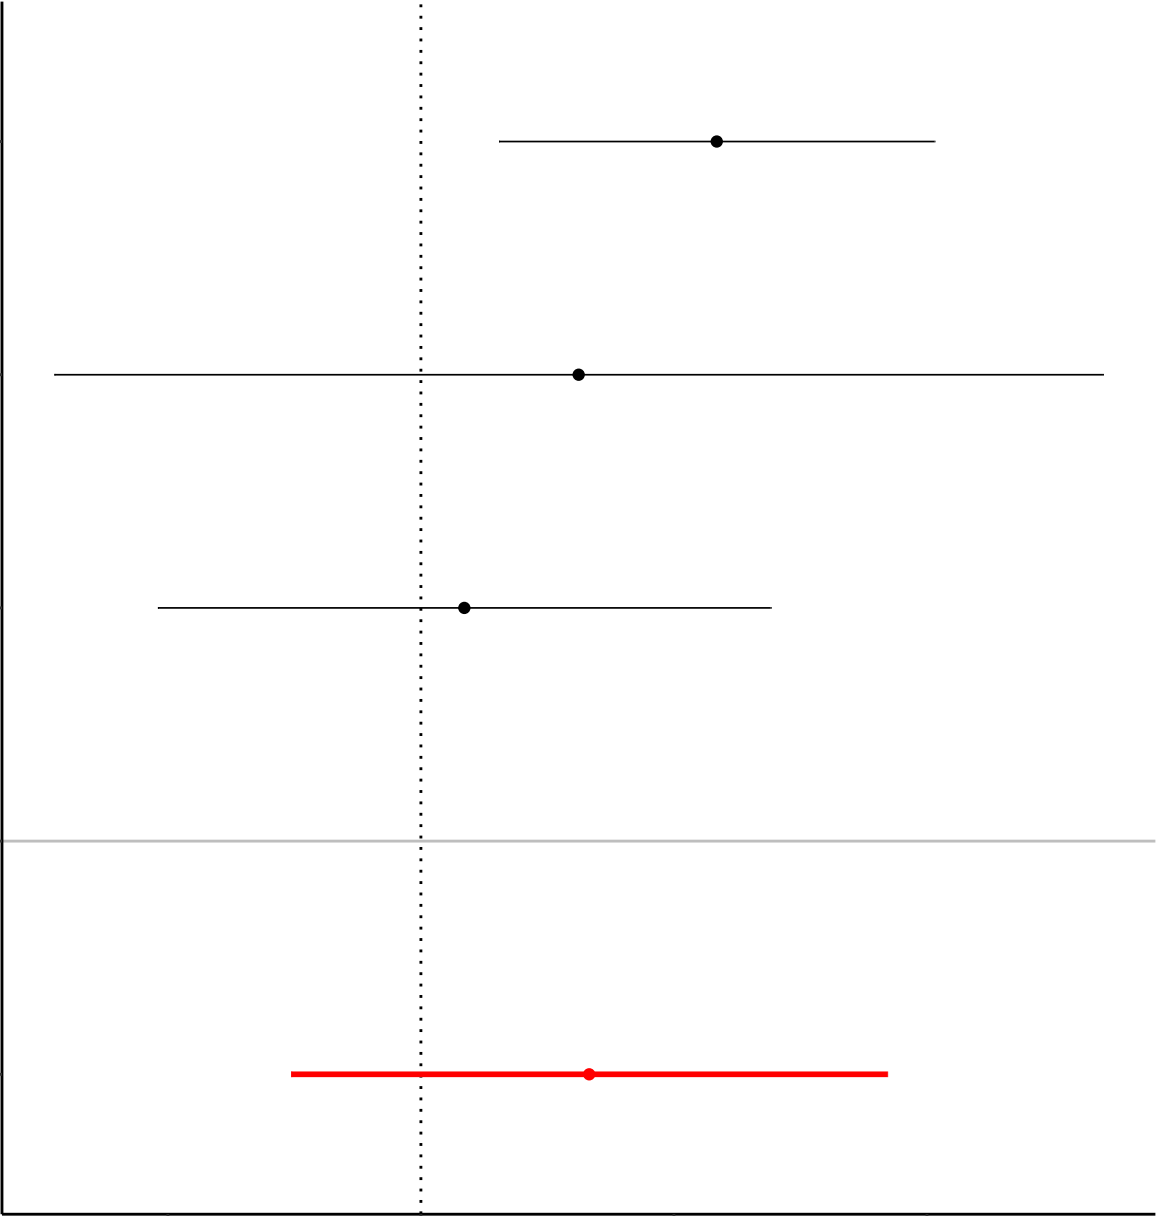

**Exposure: Corrected Insulin Response adjusted for ISI, Outcome: Coronary Artery Disease**  
**Figures of Forest Plot, Comparison of Different MR Methods, Funnel Plot and Leave-one-out Sensitivity Analysis**

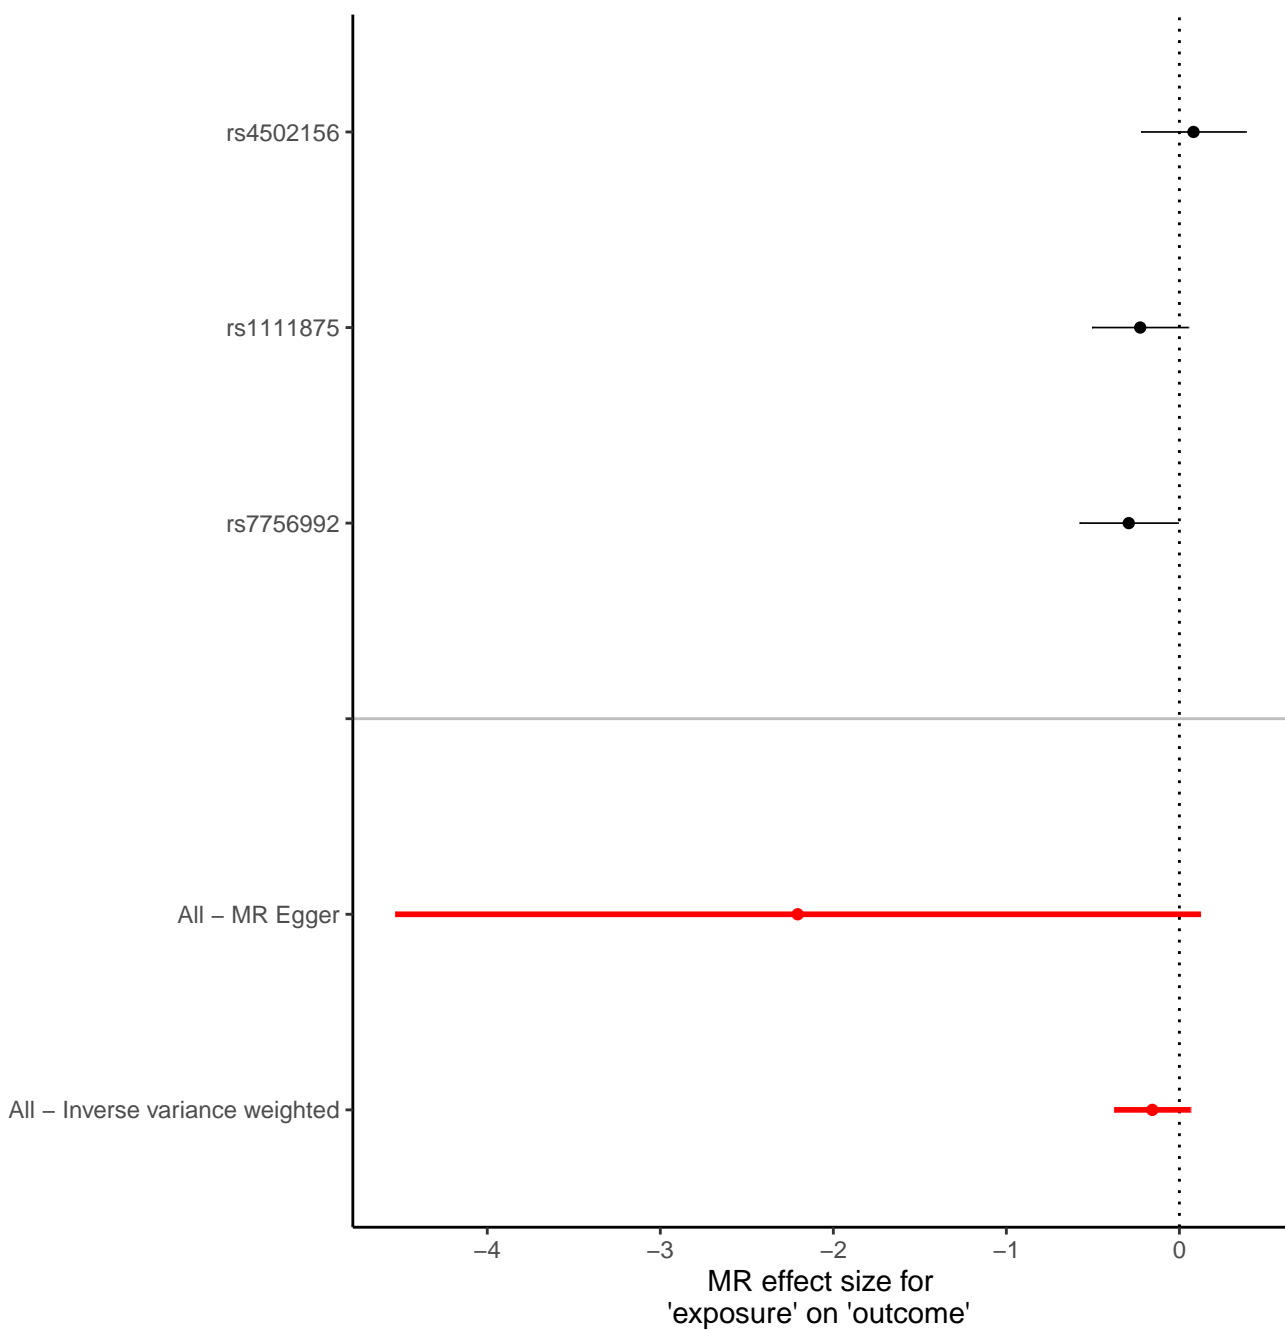



MR Test

- Inverse variance weighted
- MR Egger
- Simple mode
- Weighted median
- Weighted mode

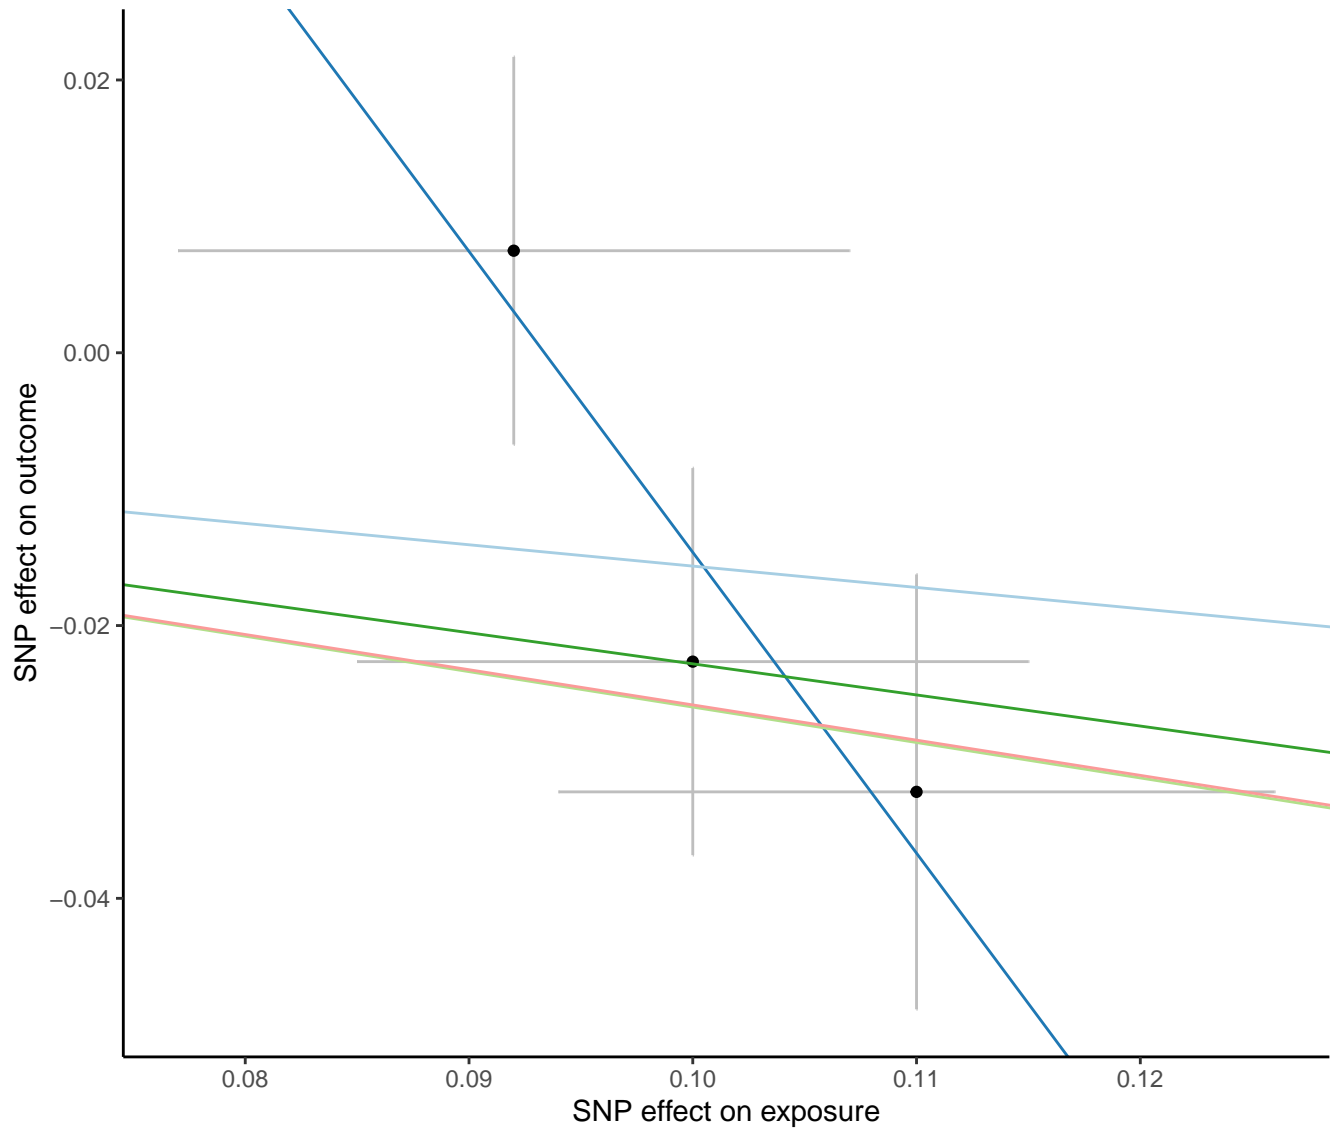

MR Method

Inverse variance weighted

MR Egger

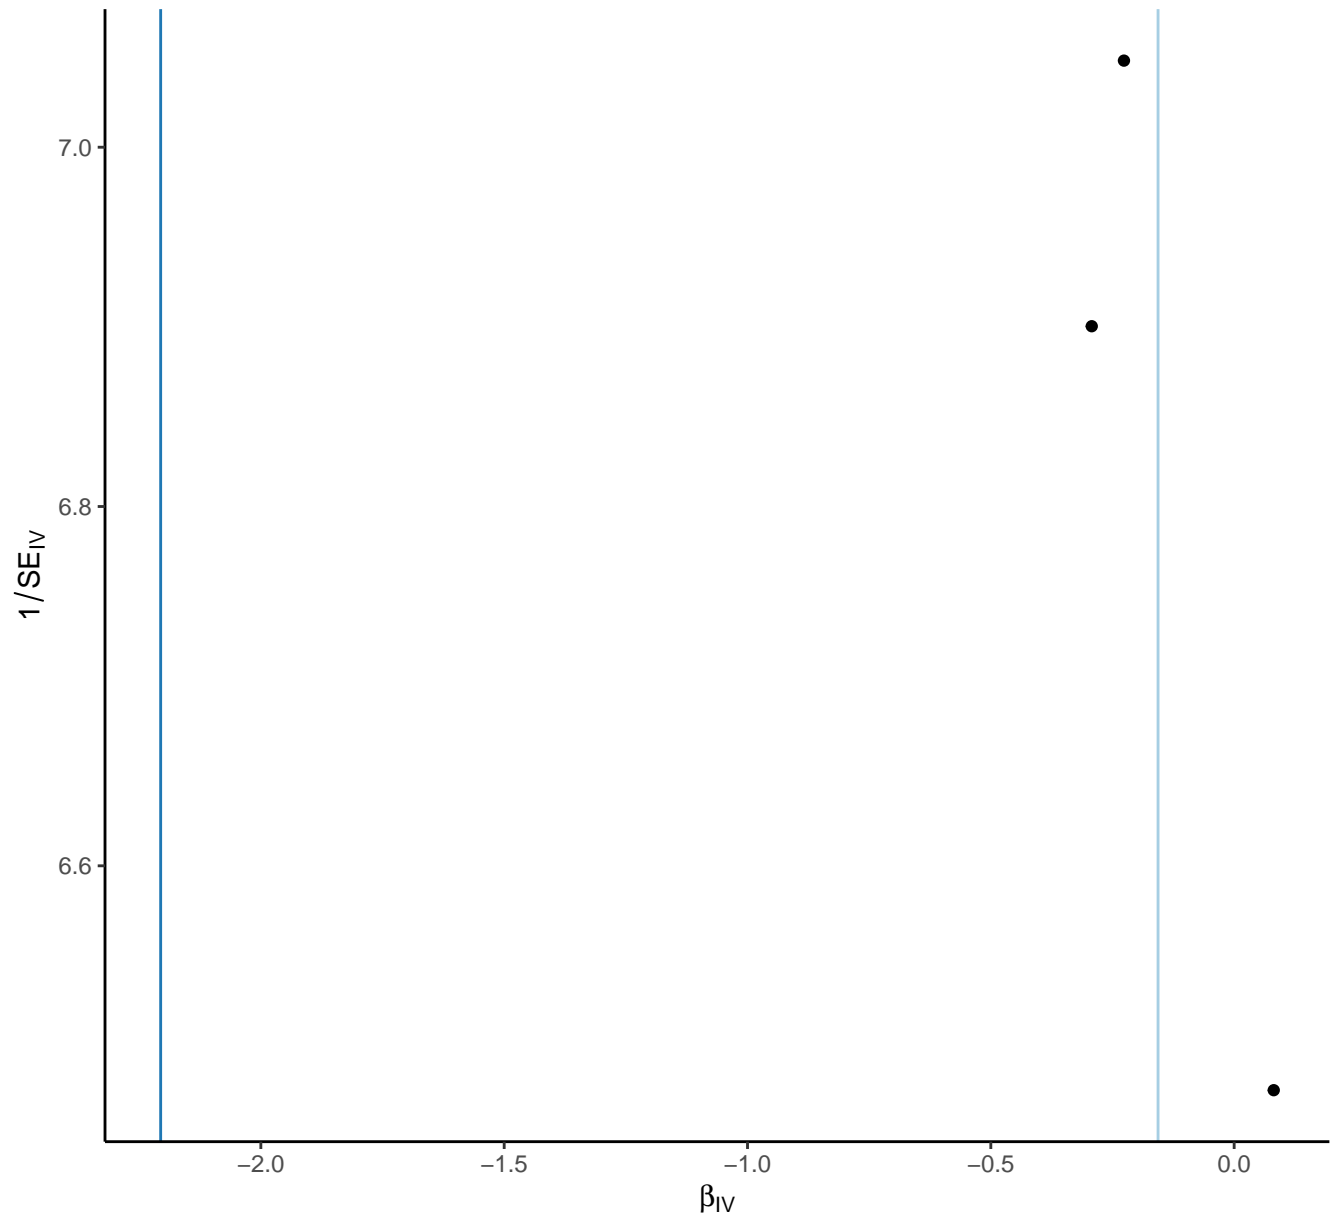

rs7756992

rs1111875

rs4502156

All

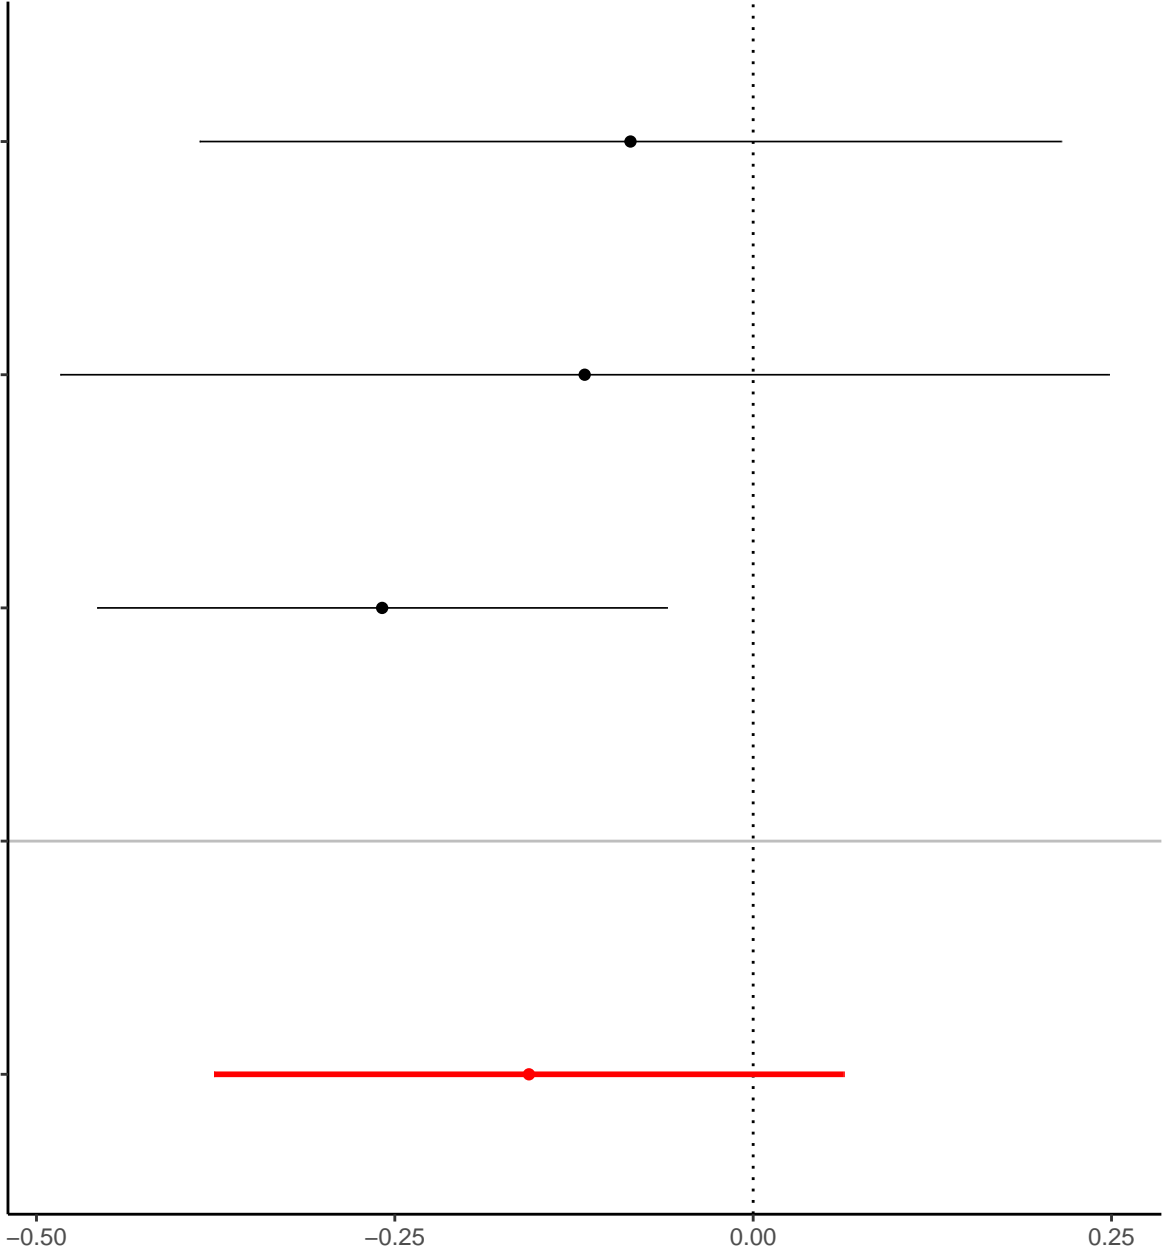

MR leave-one-out sensitivity analysis for  
'exposure' on 'outcome'

**Exposure: Corrected Insulin Response adjusted for ISI, Outcome: High Density Lipoprotein**  
**Figures of Forest Plot, Comparison of Different MR Methods, Funnel Plot and Leave-one-out Sensitivity Analysis**

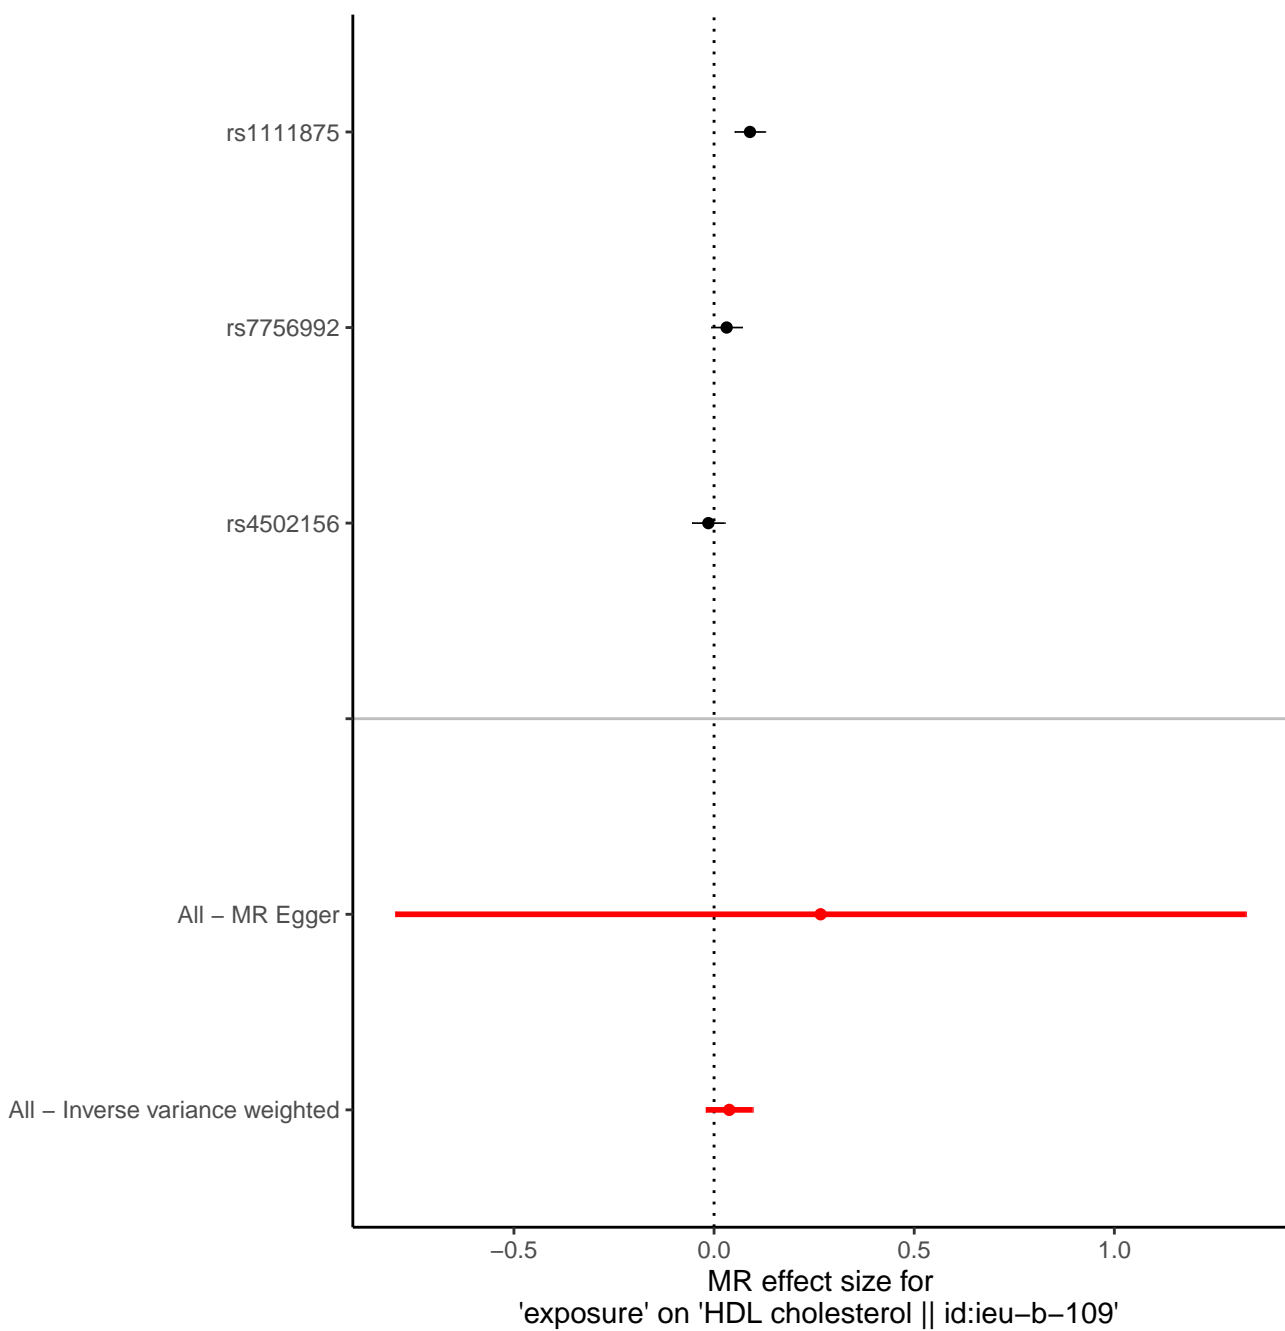

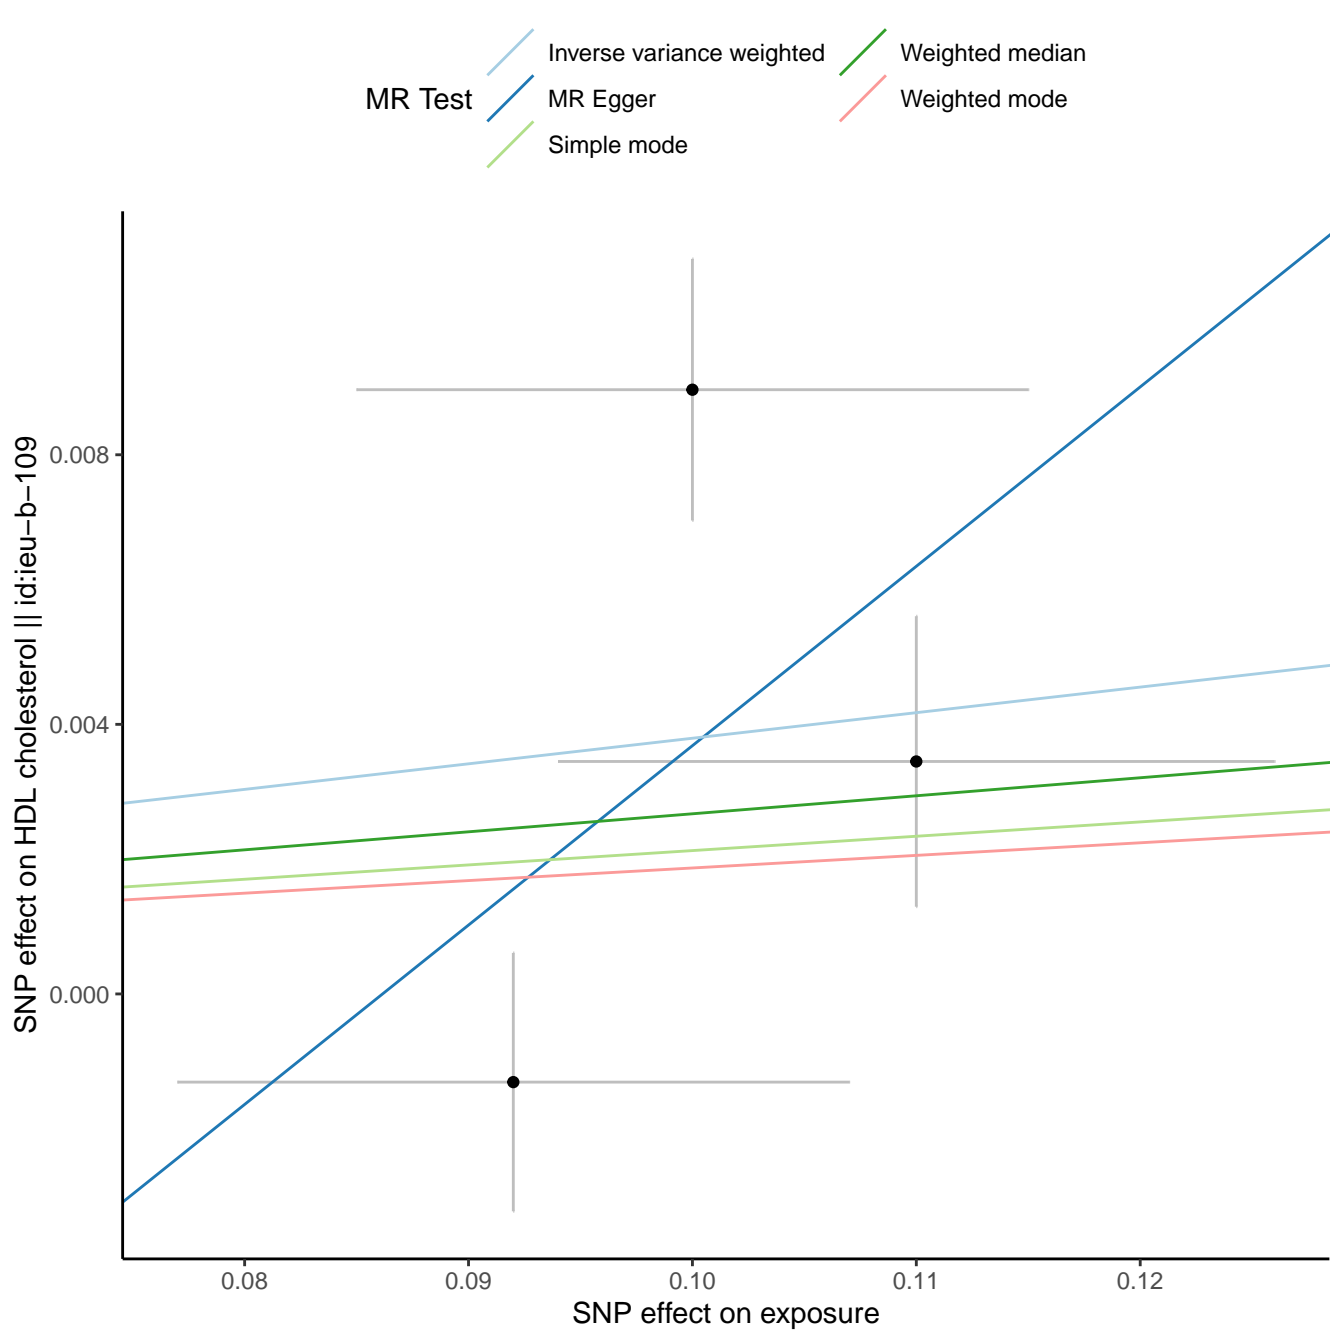

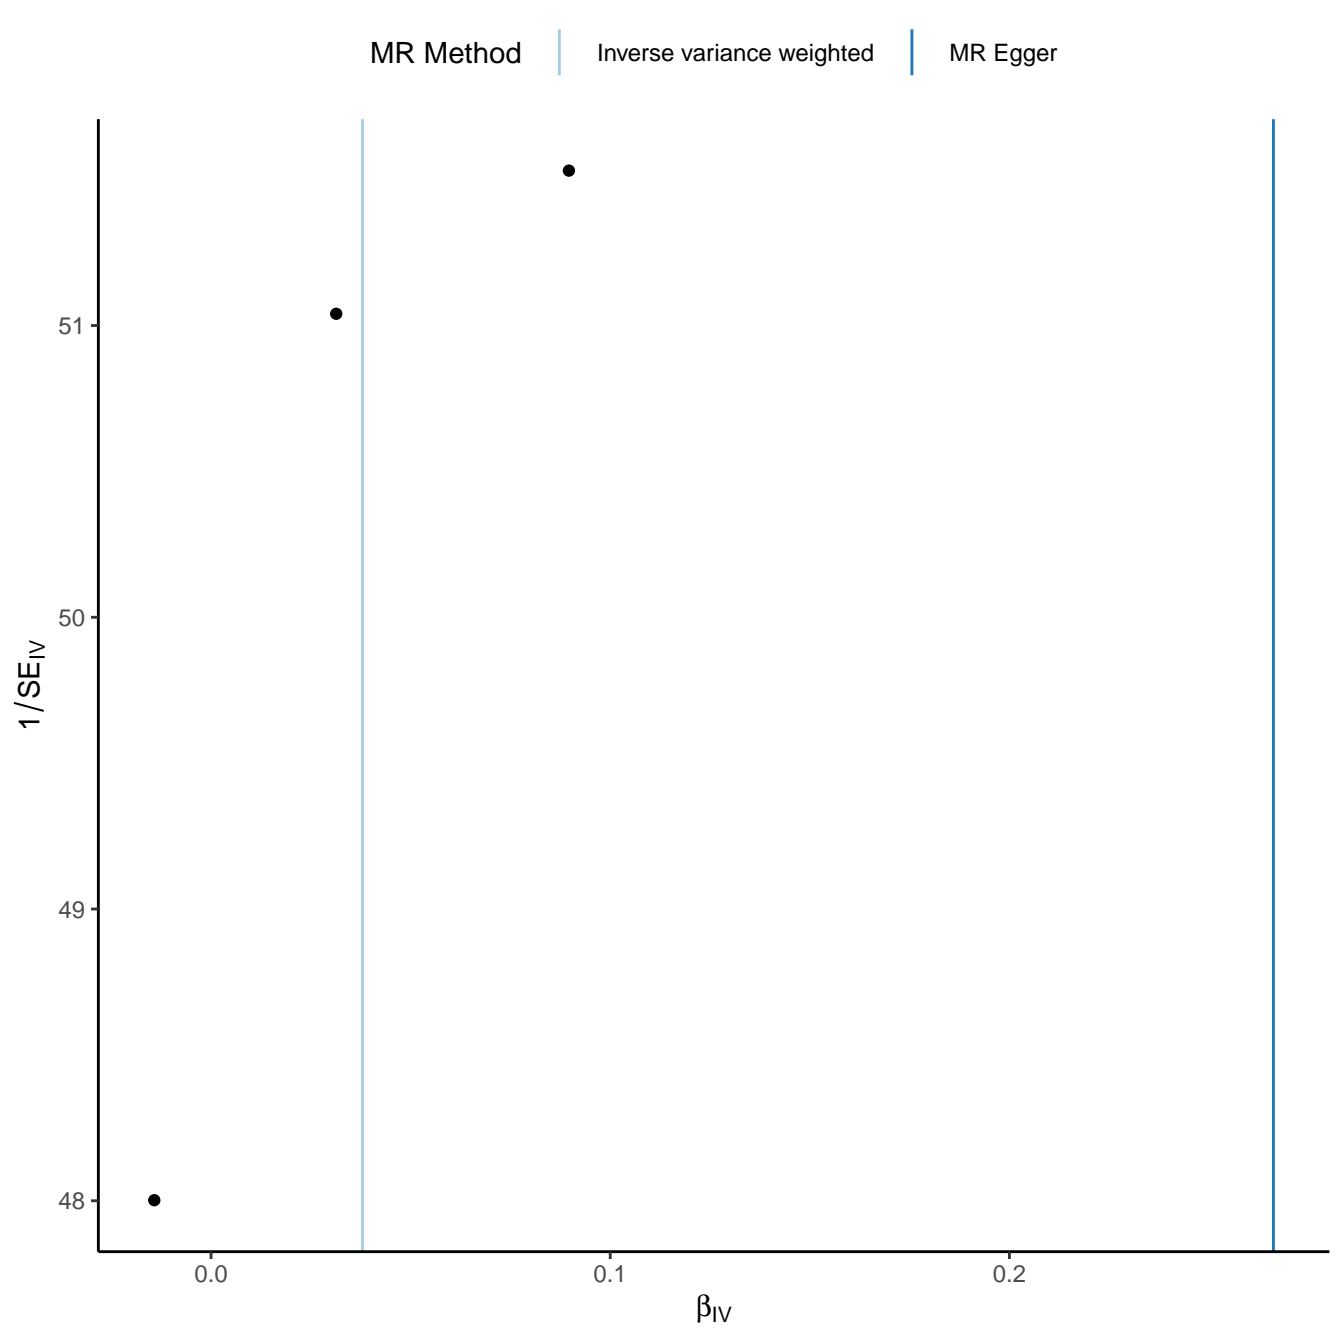

rs4502156

rs7756992

rs1111875

All

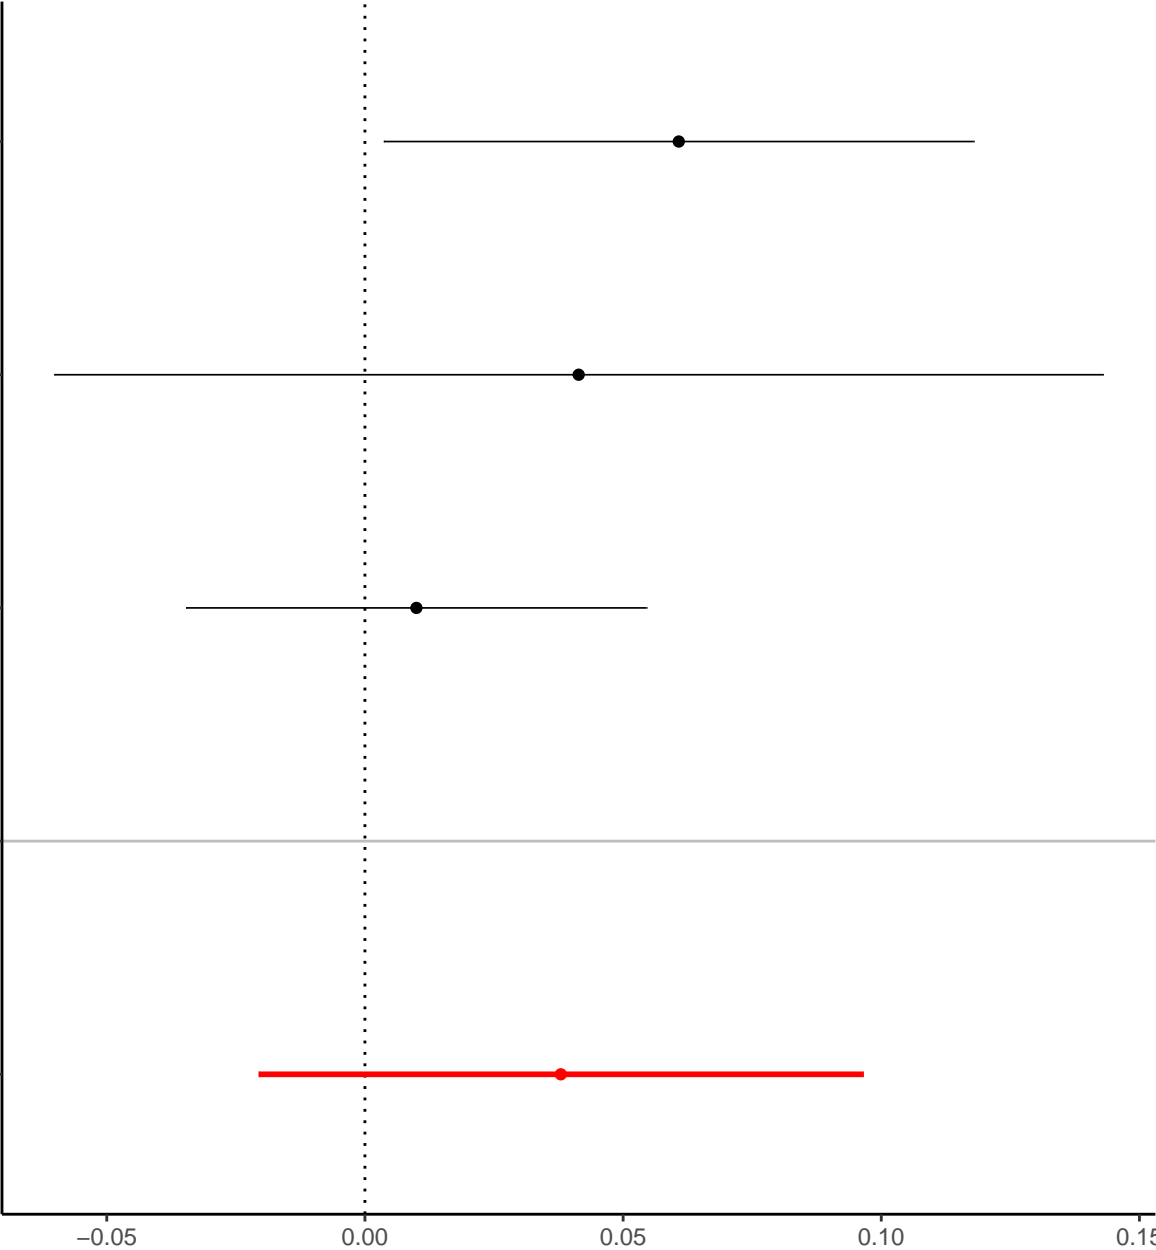

MR leave-one-out sensitivity analysis for 'exposure' on 'HDL cholesterol || id:ieu-b-109'



**Exposure: Corrected Insulin Response adjusted for ISI, Outcome: Hypertension**  
**Figures of Forest Plot, Comparison of Different MR Methods, Funnel Plot and Leave-one-out Sensitivity Analysis**

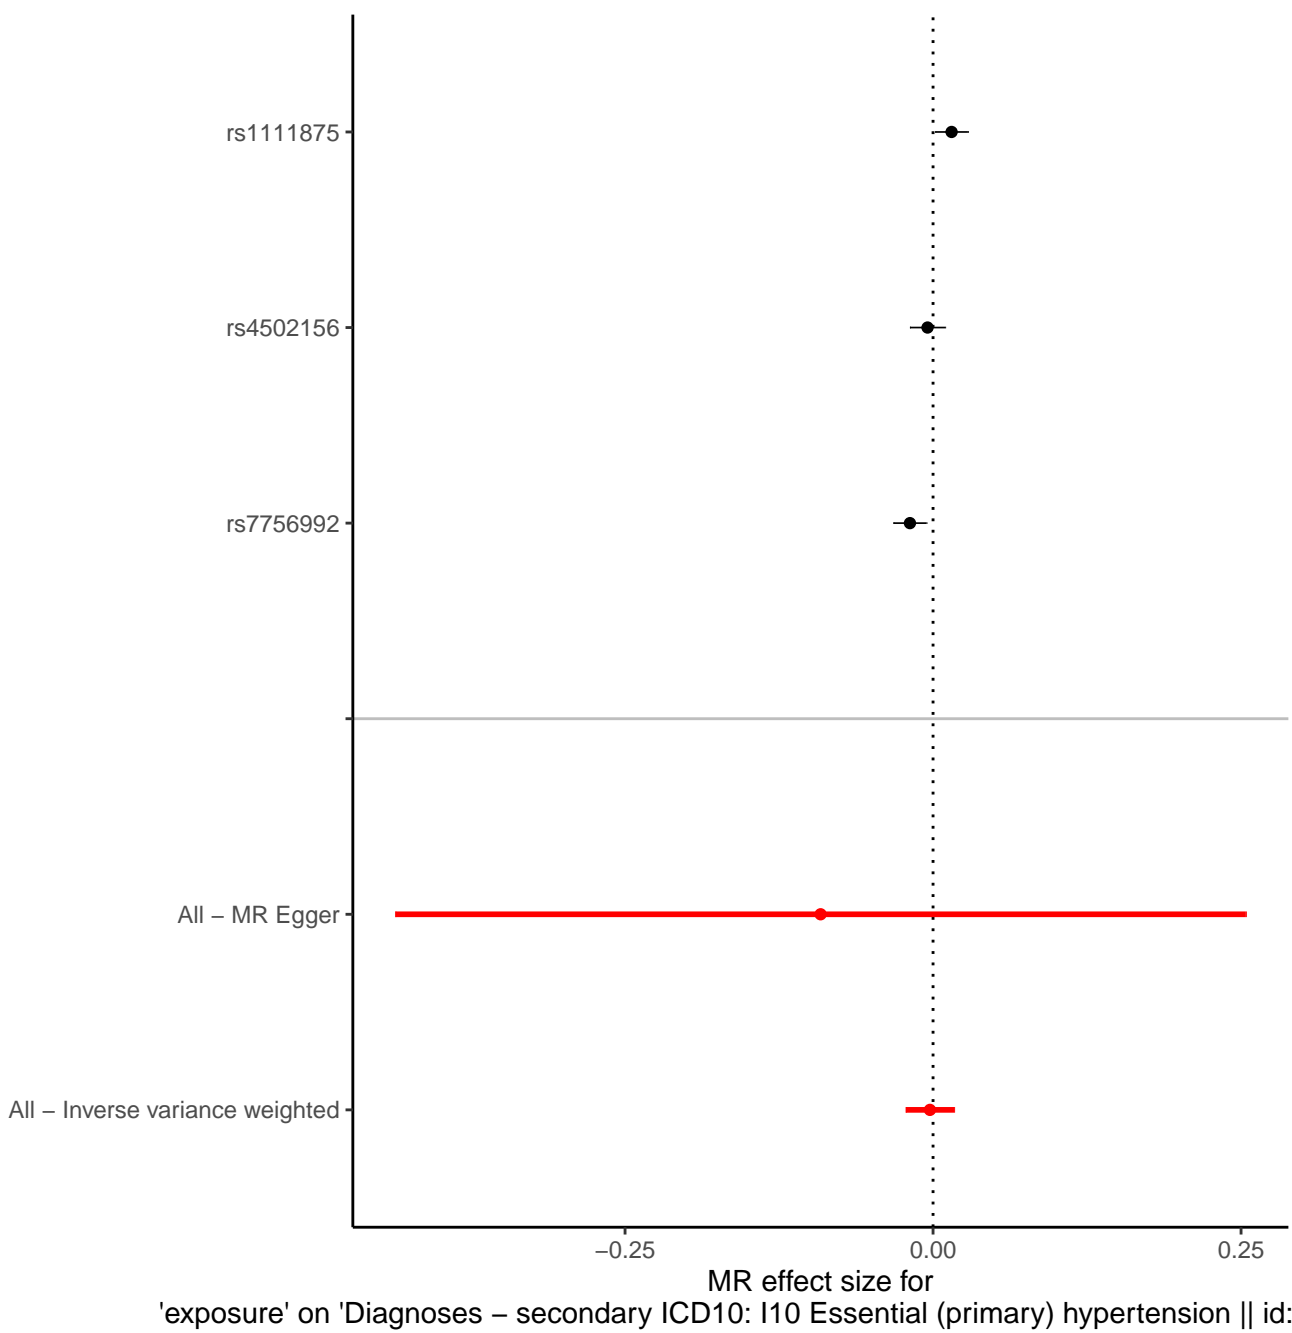

MR Test

- Inverse variance weighted
- MR Egger
- Simple mode
- Weighted median
- Weighted mode

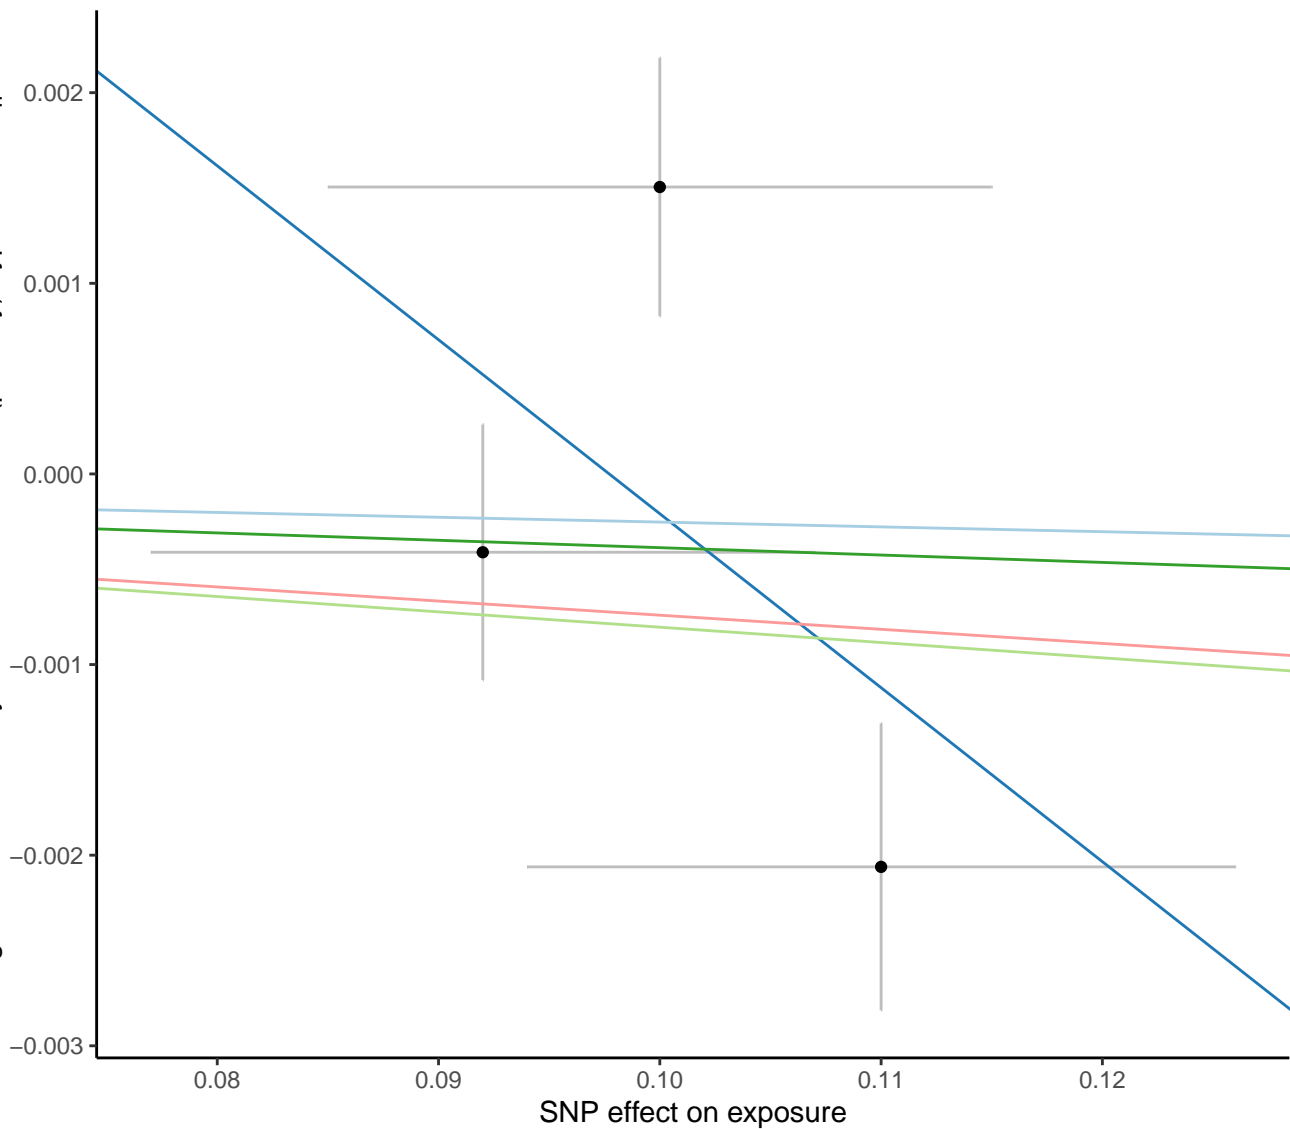

MR Method

Inverse variance weighted

MR Egger

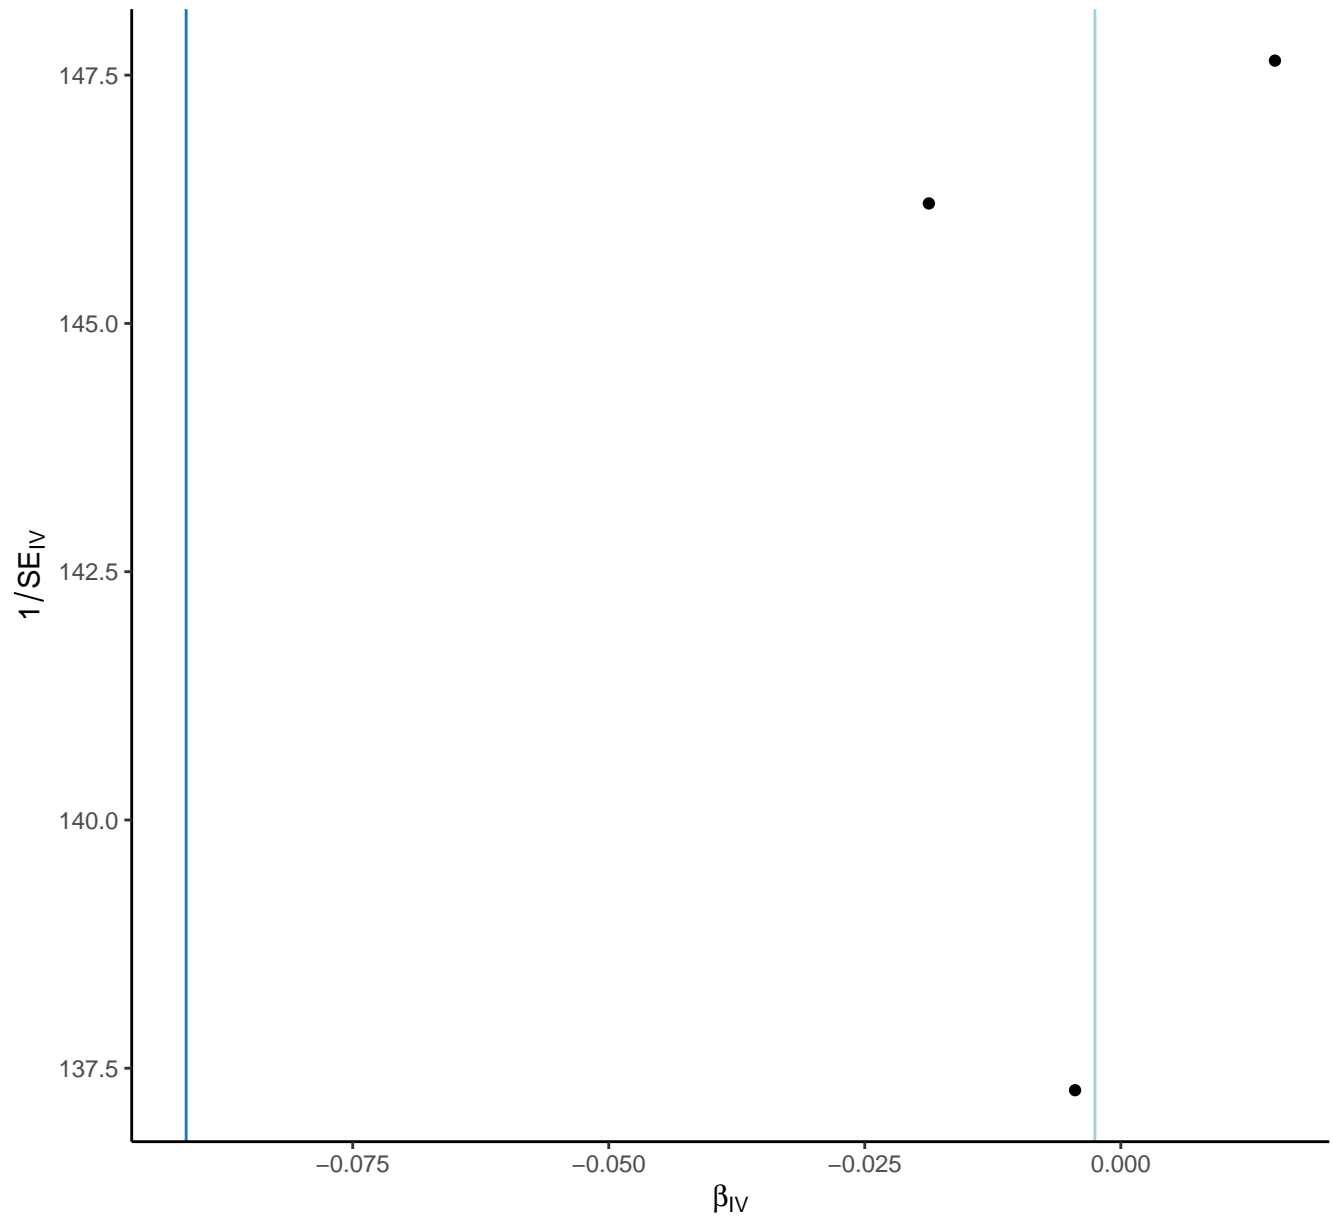

rs7756992

rs4502156

rs1111875

All

-0.02

0.00

0.02

MR leave-one-out sensitivity analysis for

'exposure' on 'Diagnoses – secondary ICD10: I10 Essential (primary) hypertension || id:ukb-b-1

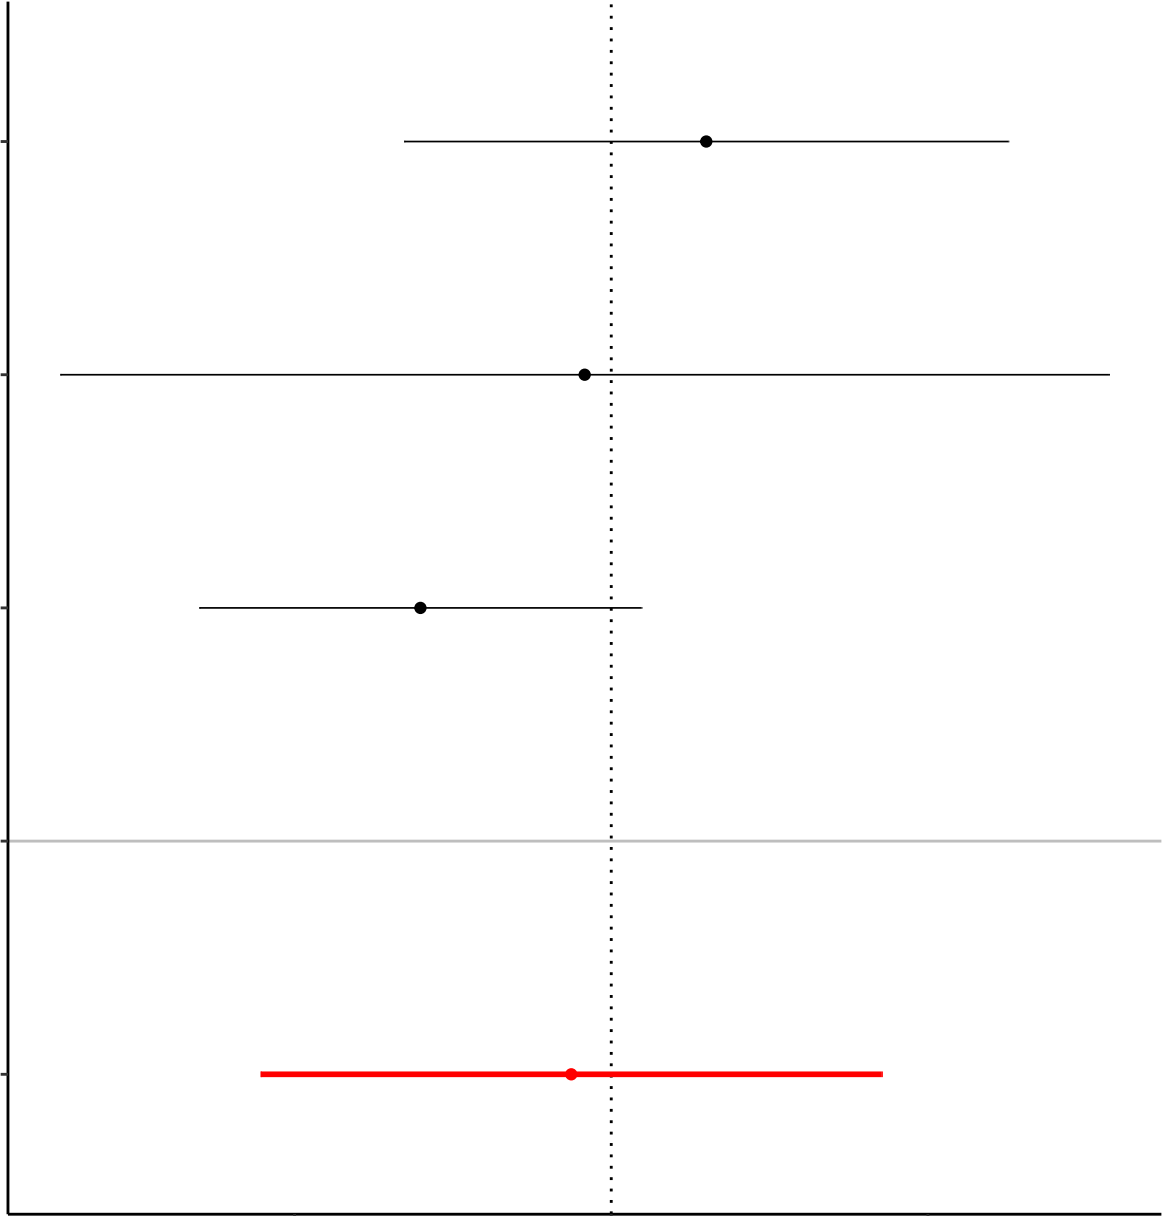

**Exposure: Corrected Insulin Response adjusted for ISI, Outcome: Leg Fat Percent - Left**  
**Figures of Forest Plot, Comparison of Different MR Methods, Funnel Plot and Leave-one-out Sensitivity Analysis**

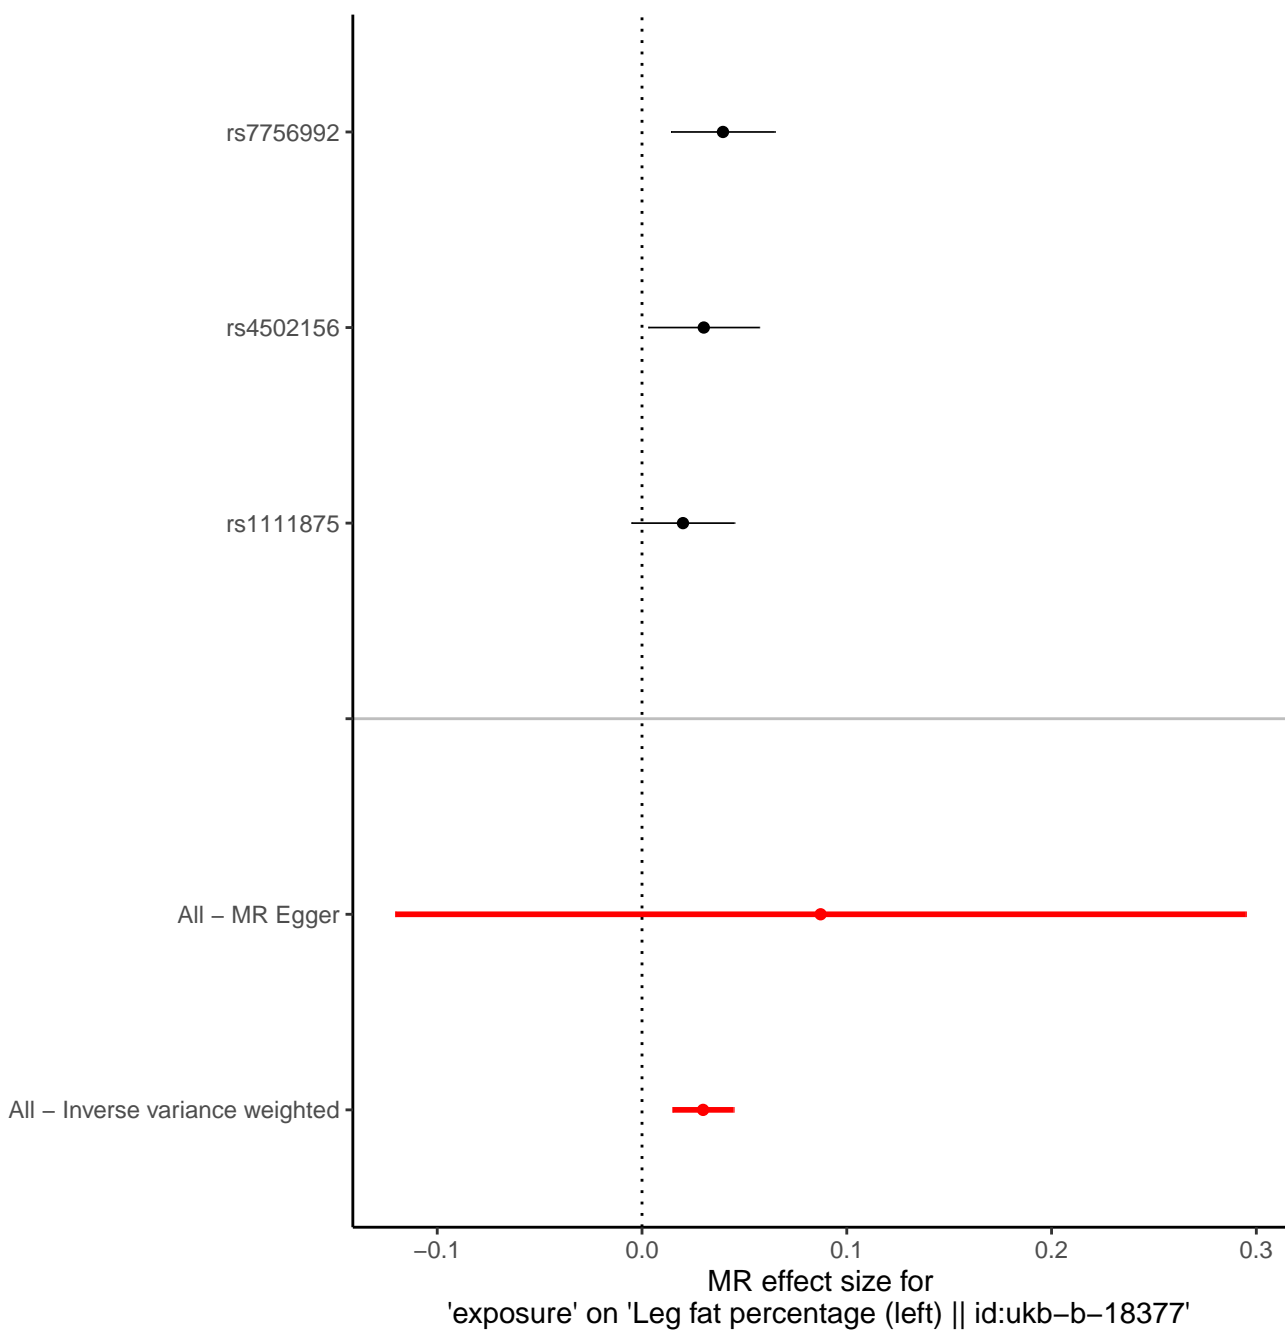

MR Test

- Inverse variance weighted
- MR Egger
- Simple mode
- Weighted median
- Weighted mode

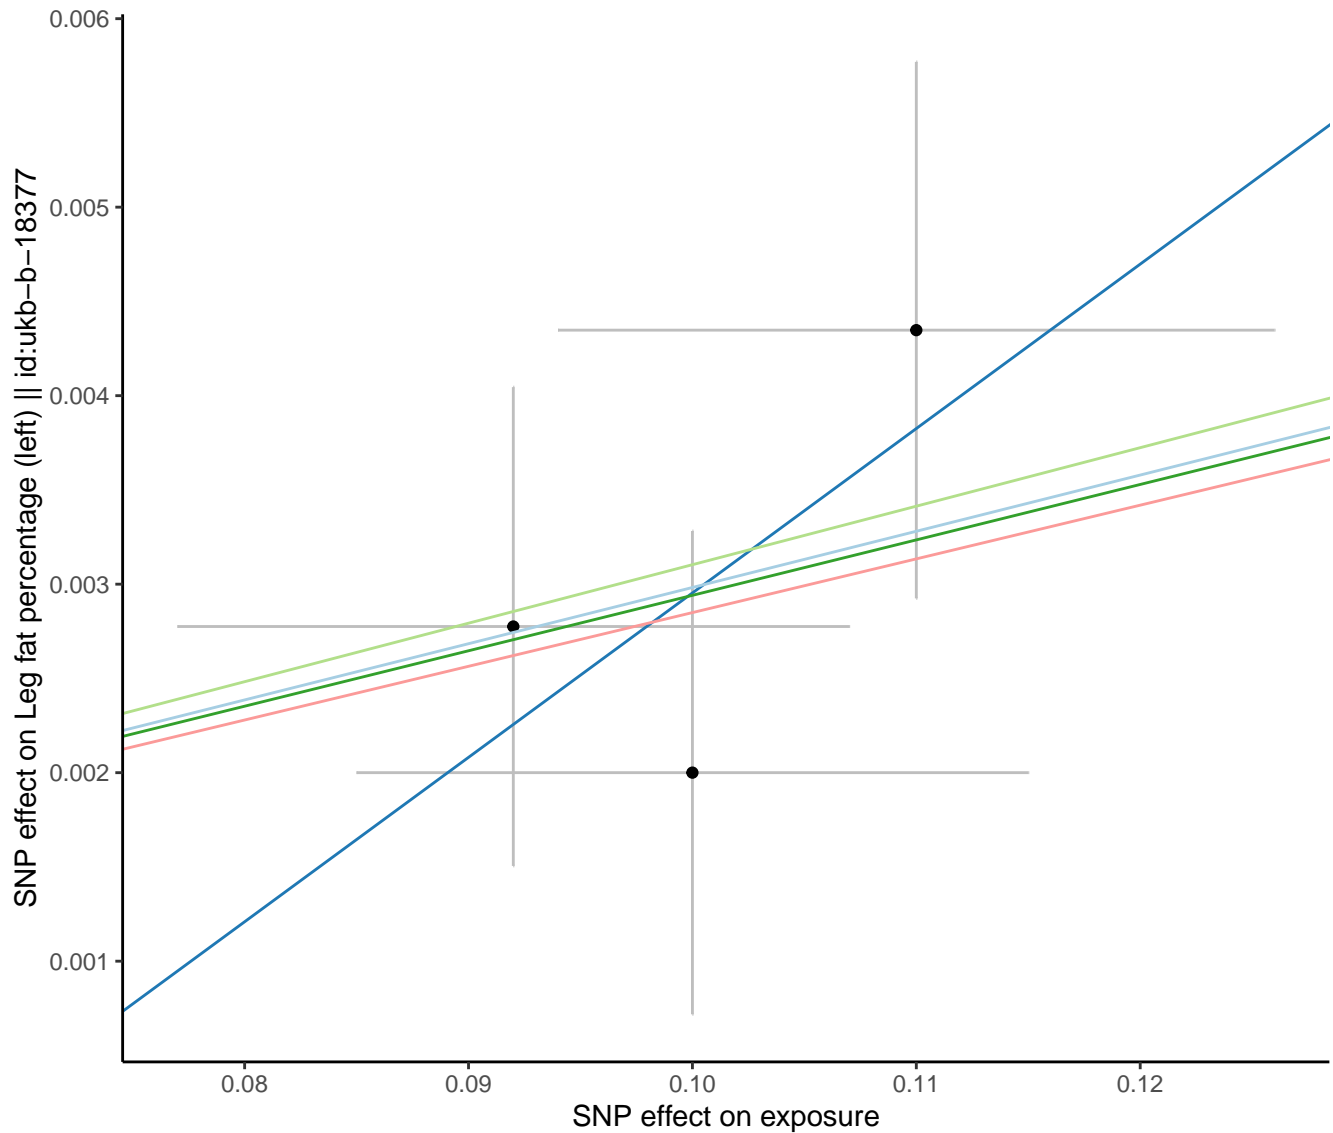



MR Method

Inverse variance weighted

MR Egger

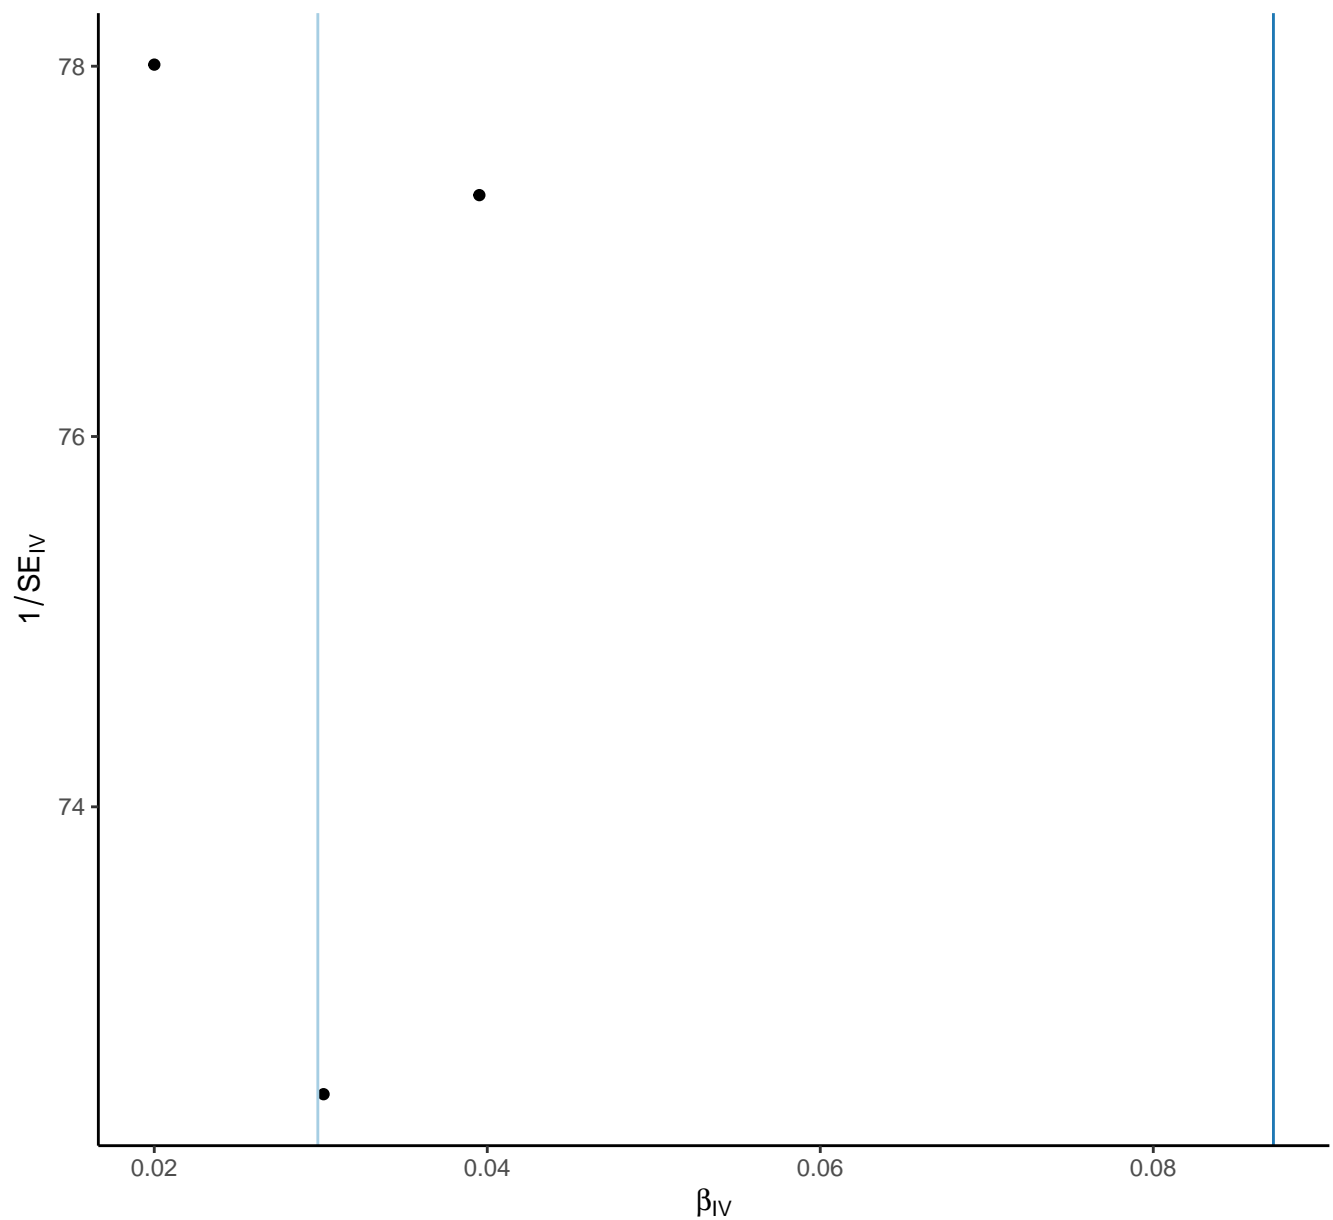

rs1111875

rs4502156

rs7756992

All

0.00

0.02

0.04

MR leave-one-out sensitivity analysis for  
'exposure' on 'Leg fat percentage (left) || id:ukb-b-18377'

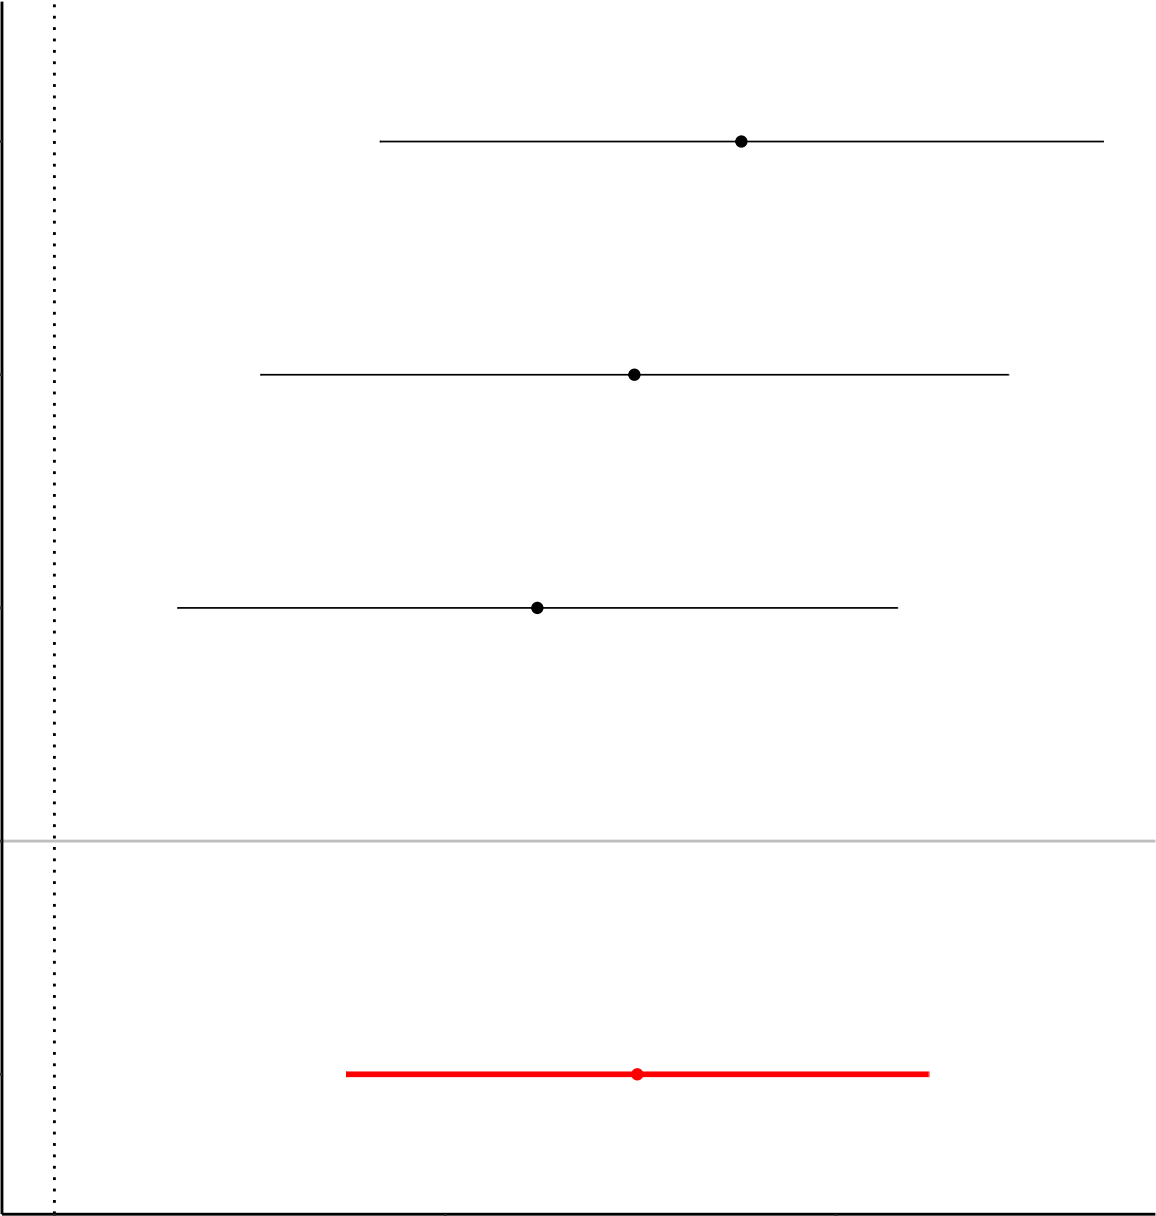

**Exposure: Corrected Insulin Response adjusted for ISI, Outcome: Leg Fat Percent - Right**  
**Figures of Forest Plot, Comparison of Different MR Methods, Funnel Plot and Leave-one-out Sensitivity Analysis**

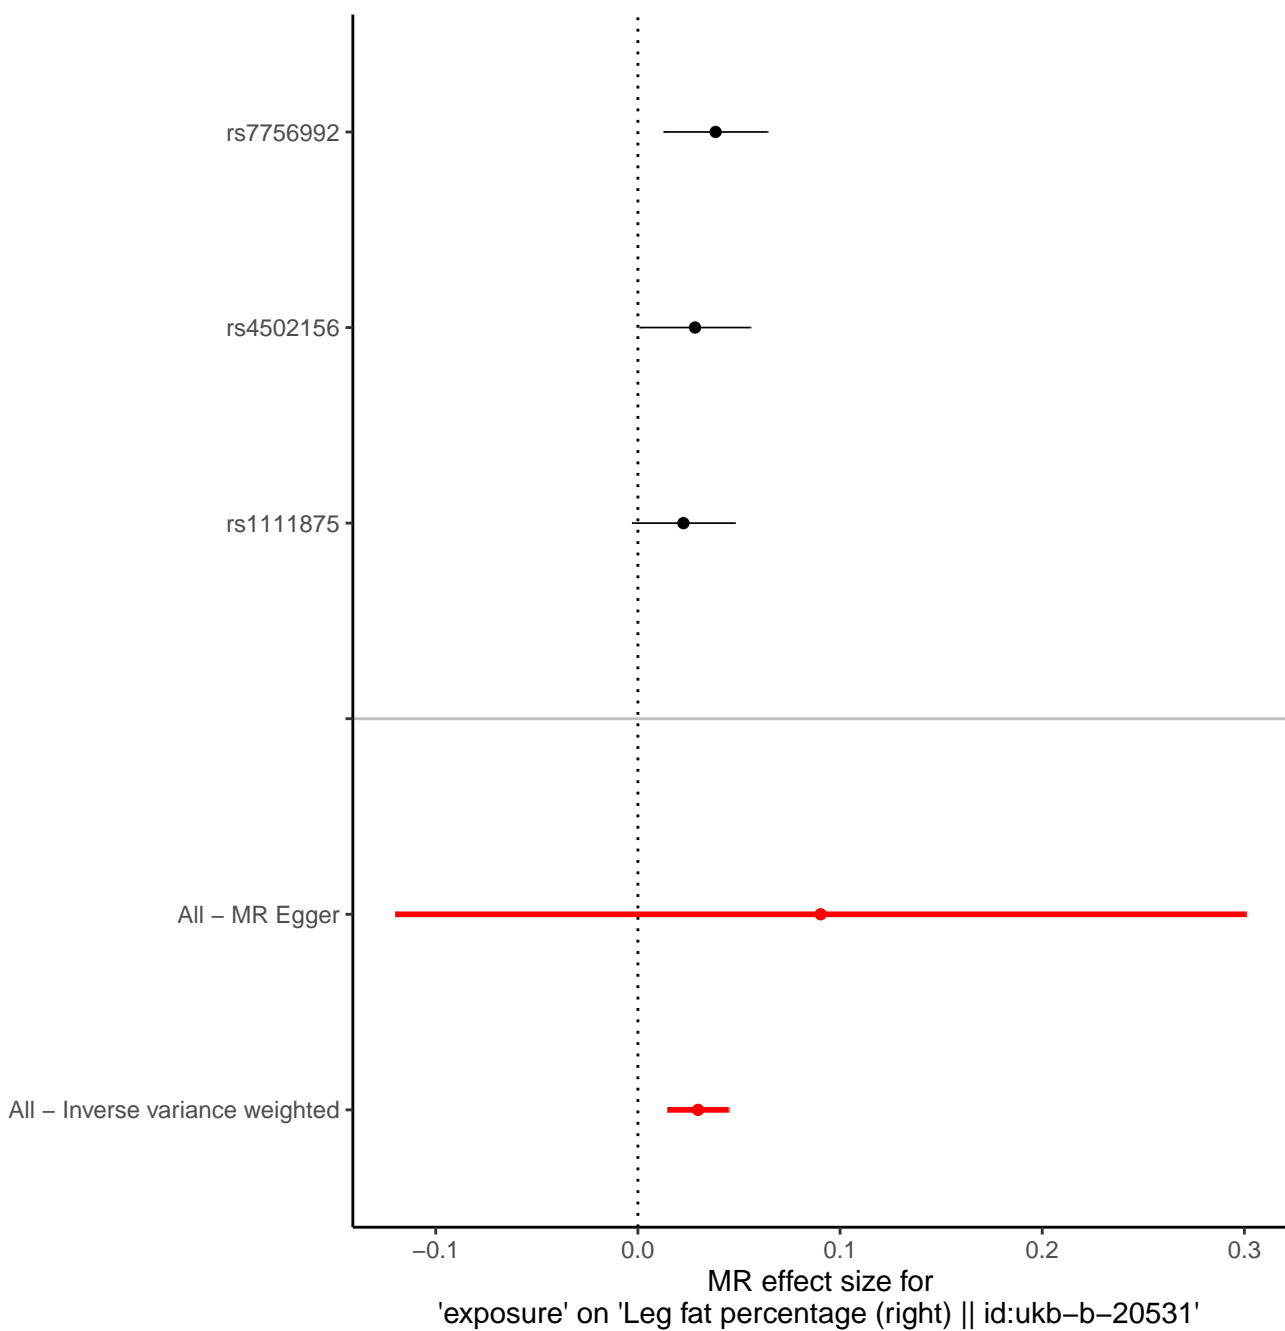

MR Test

- Inverse variance weighted
- MR Egger
- Simple mode
- Weighted median
- Weighted mode

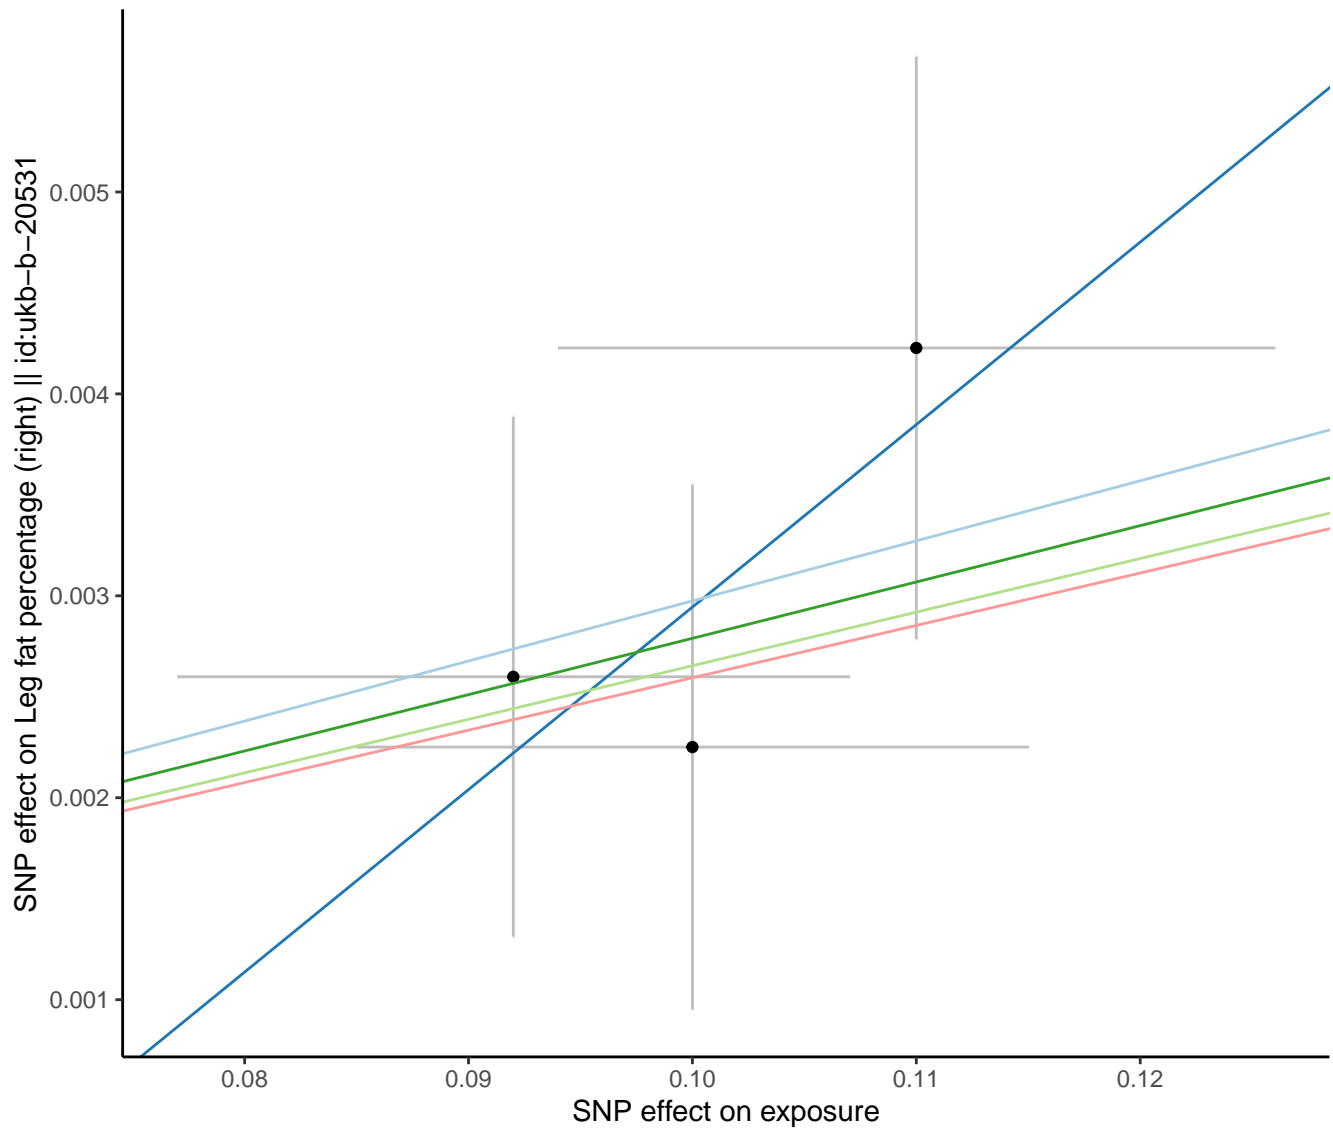

MR Method

Inverse variance weighted

MR Egger

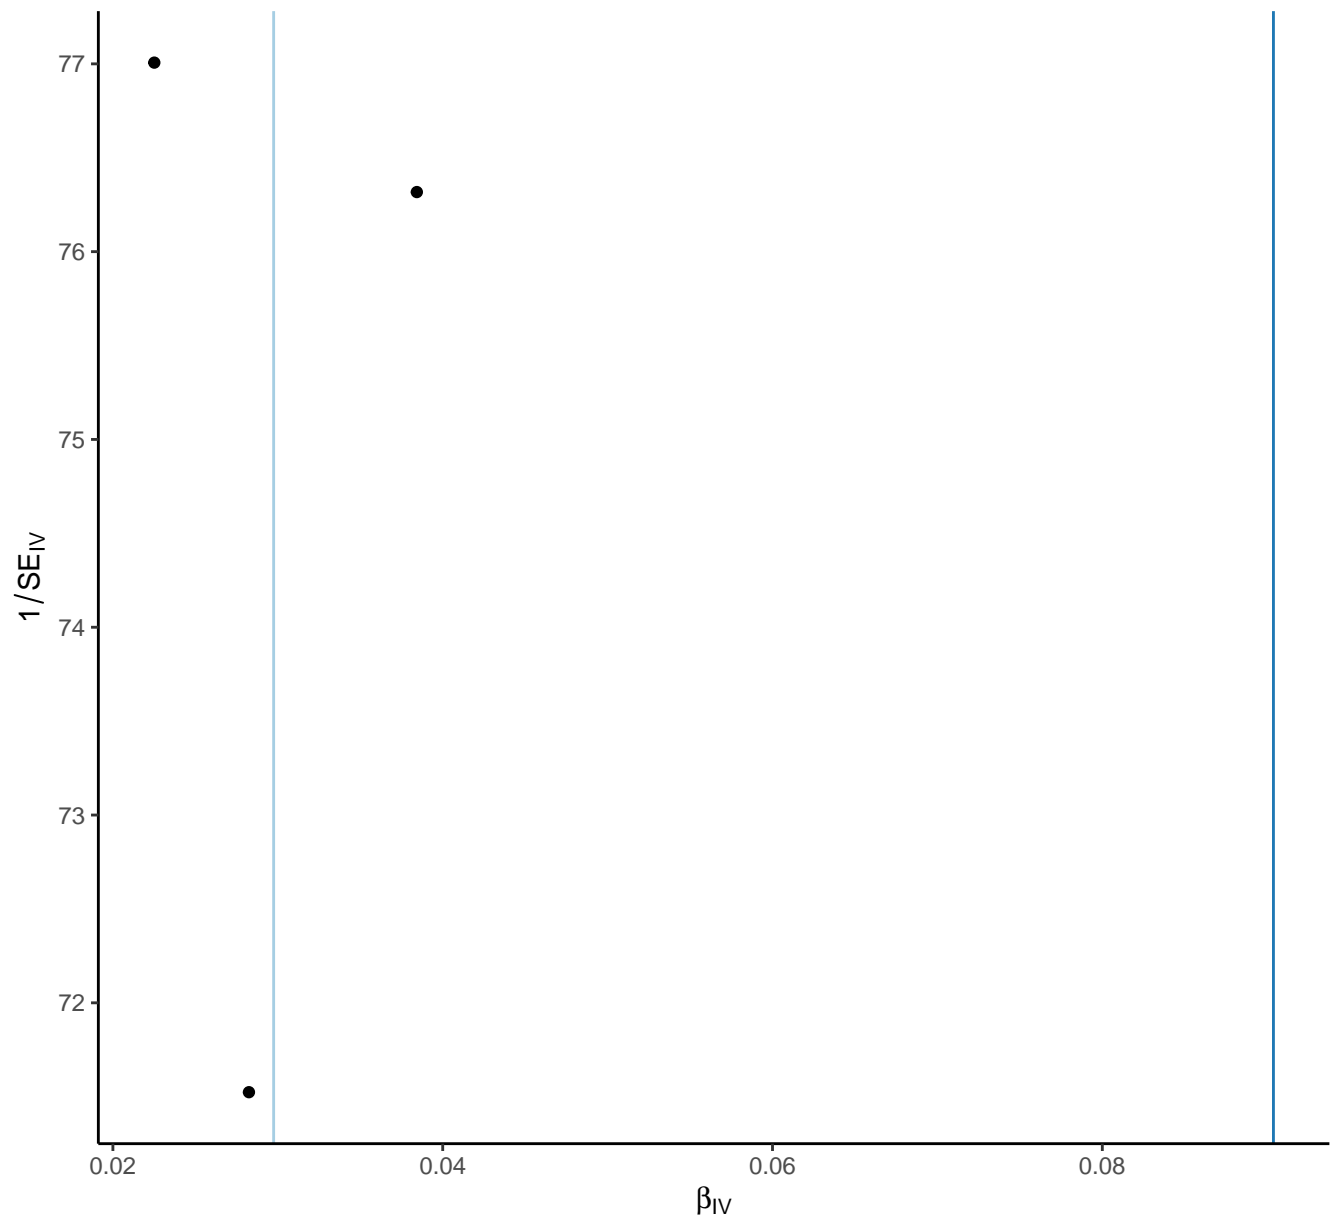

rs1111875

rs4502156

rs7756992

All

0.00

0.01

0.02

0.03

0.04

0.05

MR leave-one-out sensitivity analysis for  
'exposure' on 'Leg fat percentage (right) || id:ukb-b-20531'

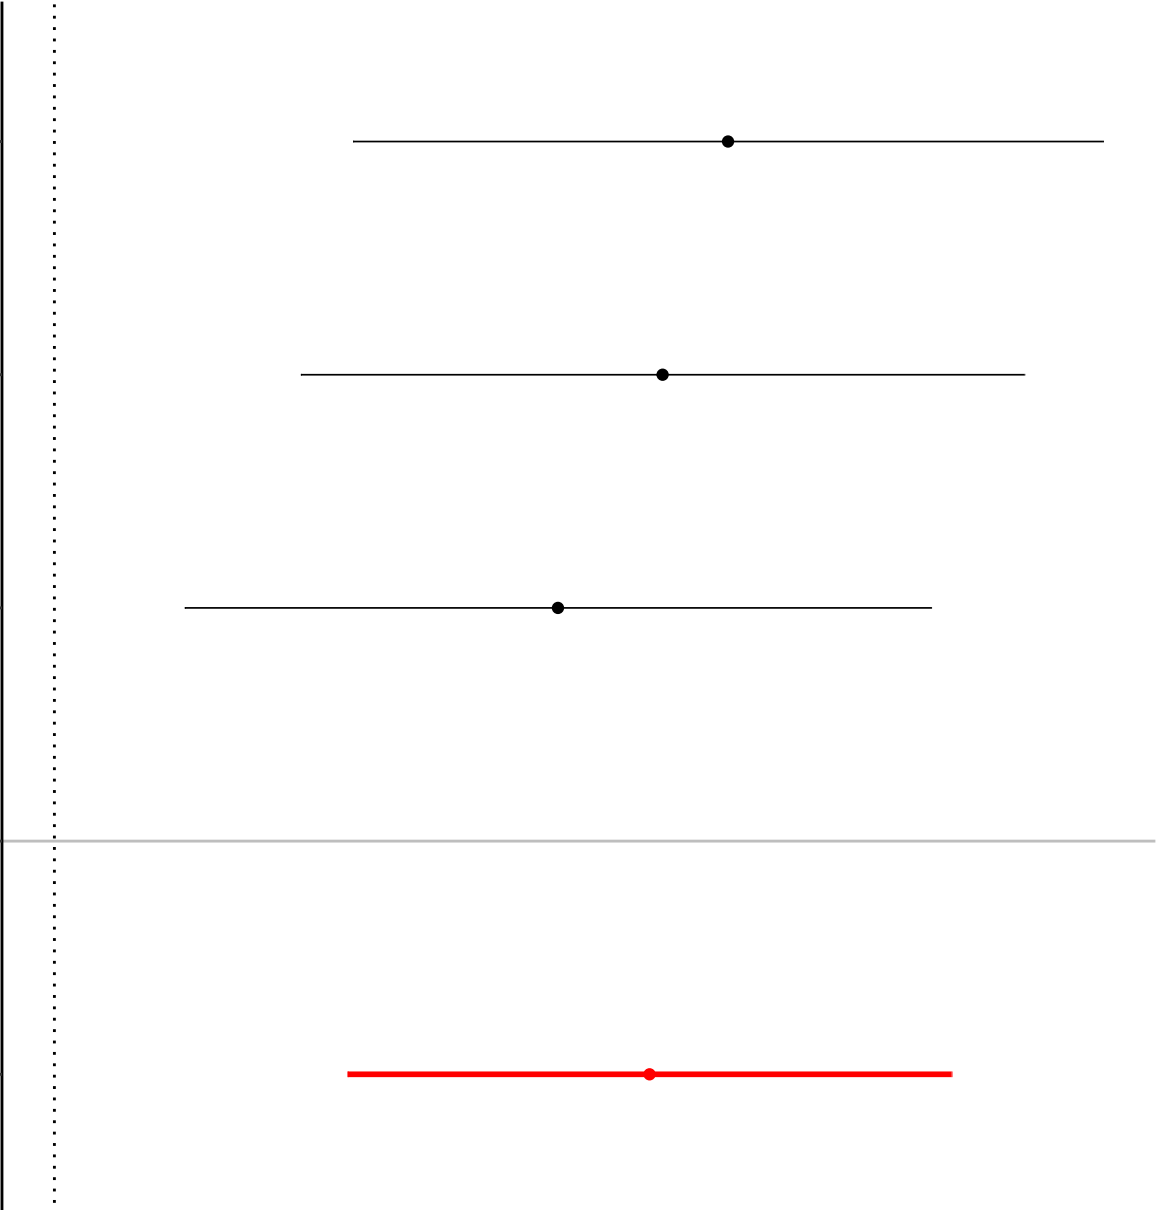

**Exposure: Corrected Insulin Response adjusted for ISI, Outcome: Liver Fat**  
**Figures of Forest Plot, Comparison of Different MR Methods, Funnel Plot and Leave-one-out Sensitivity Analysis**



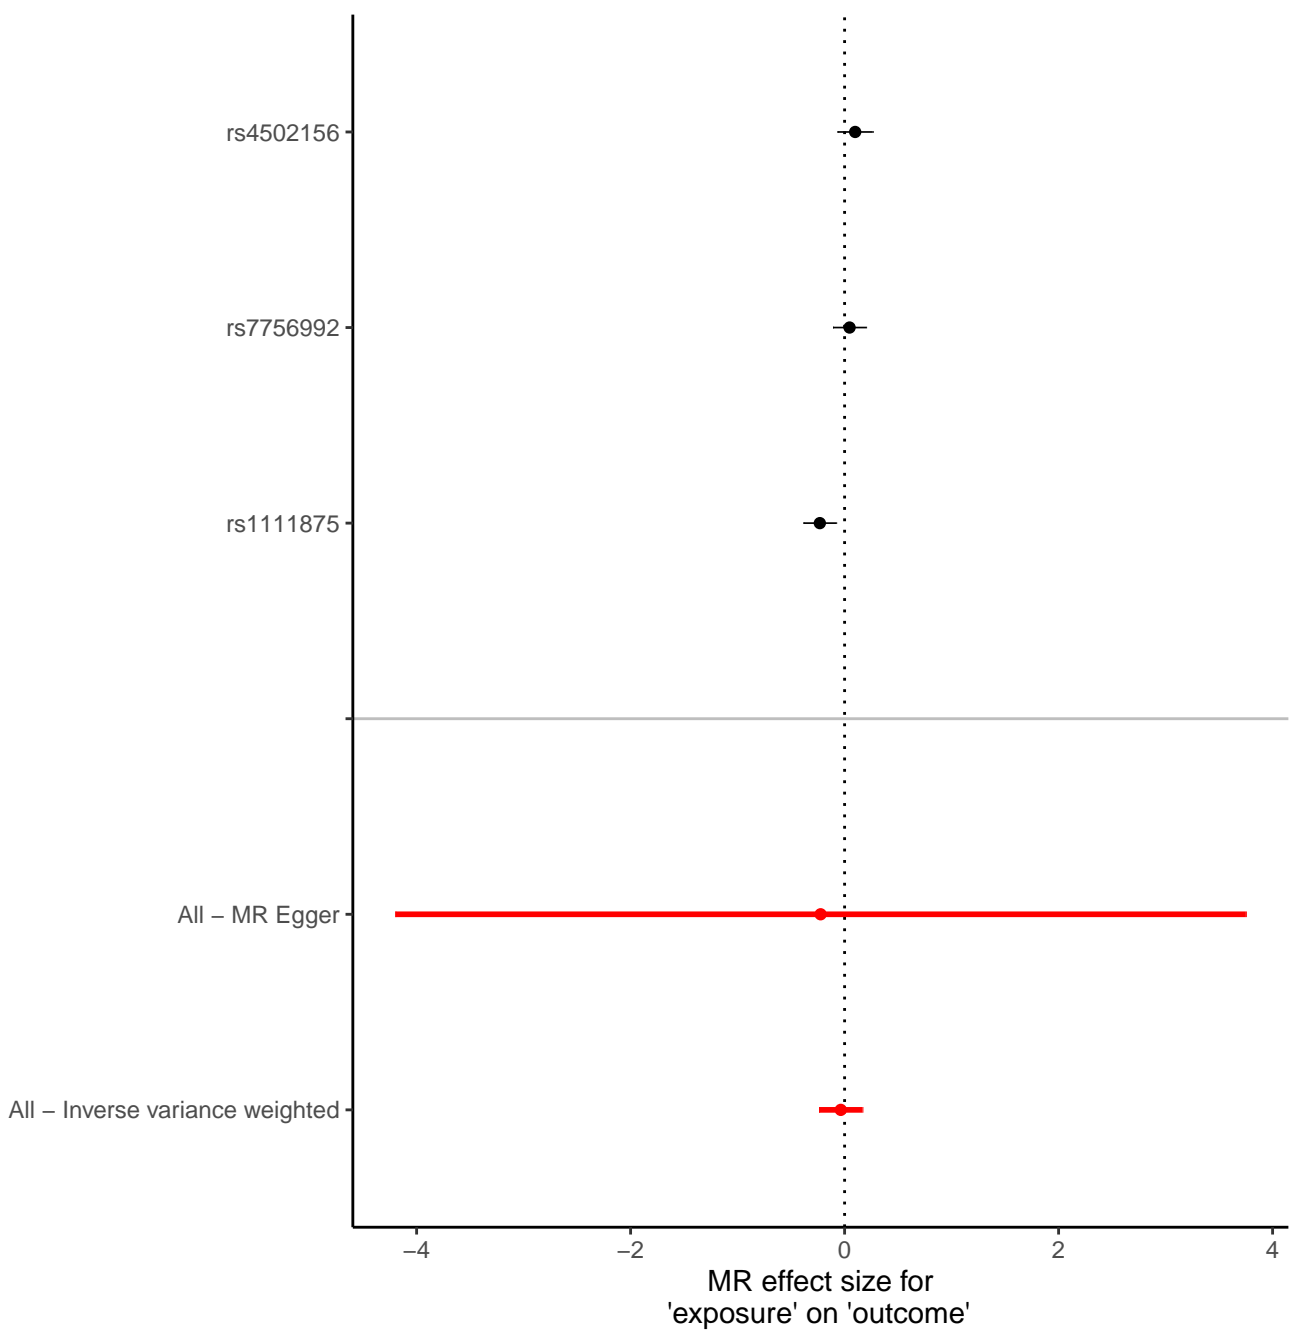

MR Test

- Inverse variance weighted
- MR Egger
- Simple mode
- Weighted median
- Weighted mode

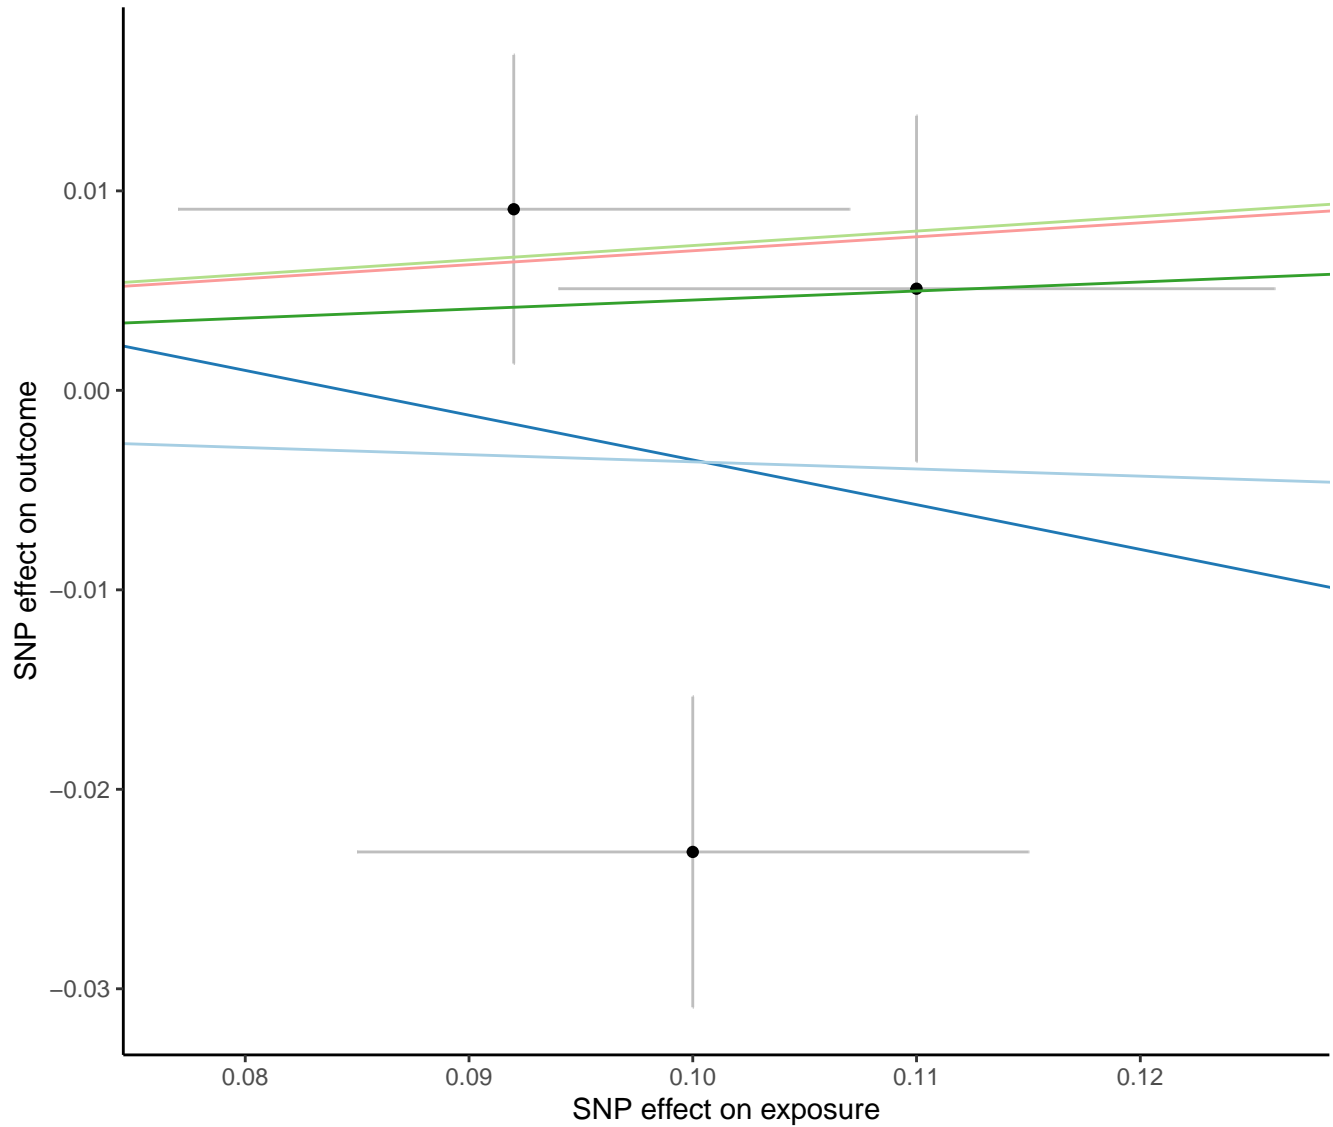

MR Method

Inverse variance weighted

MR Egger

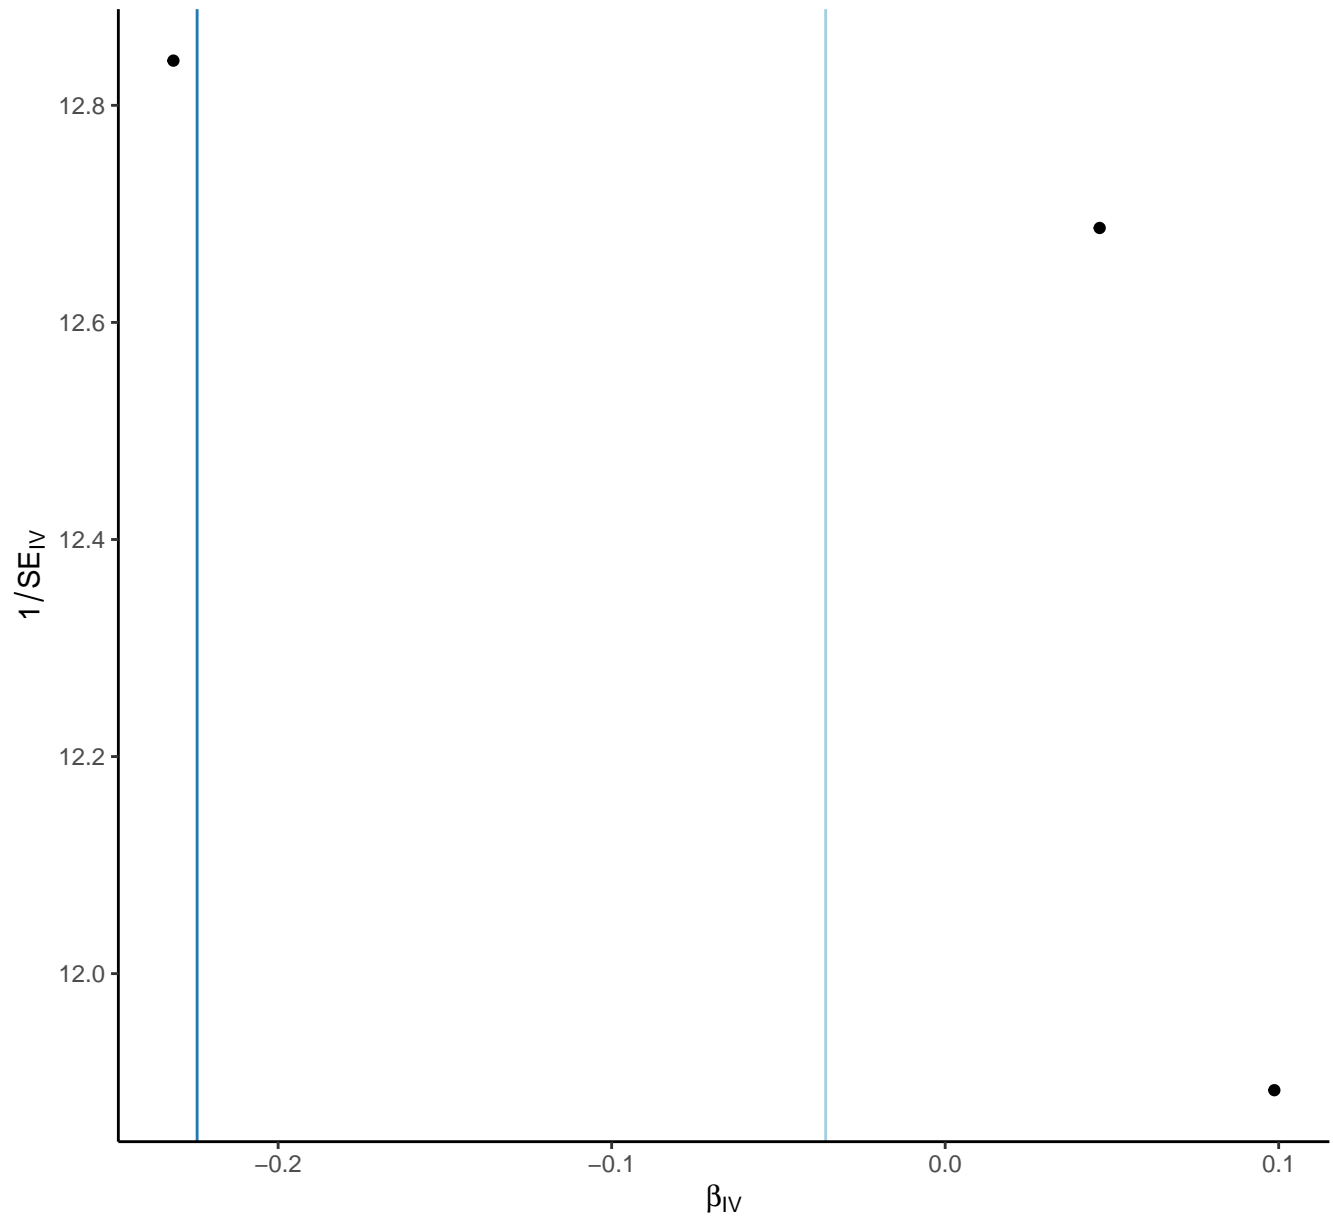

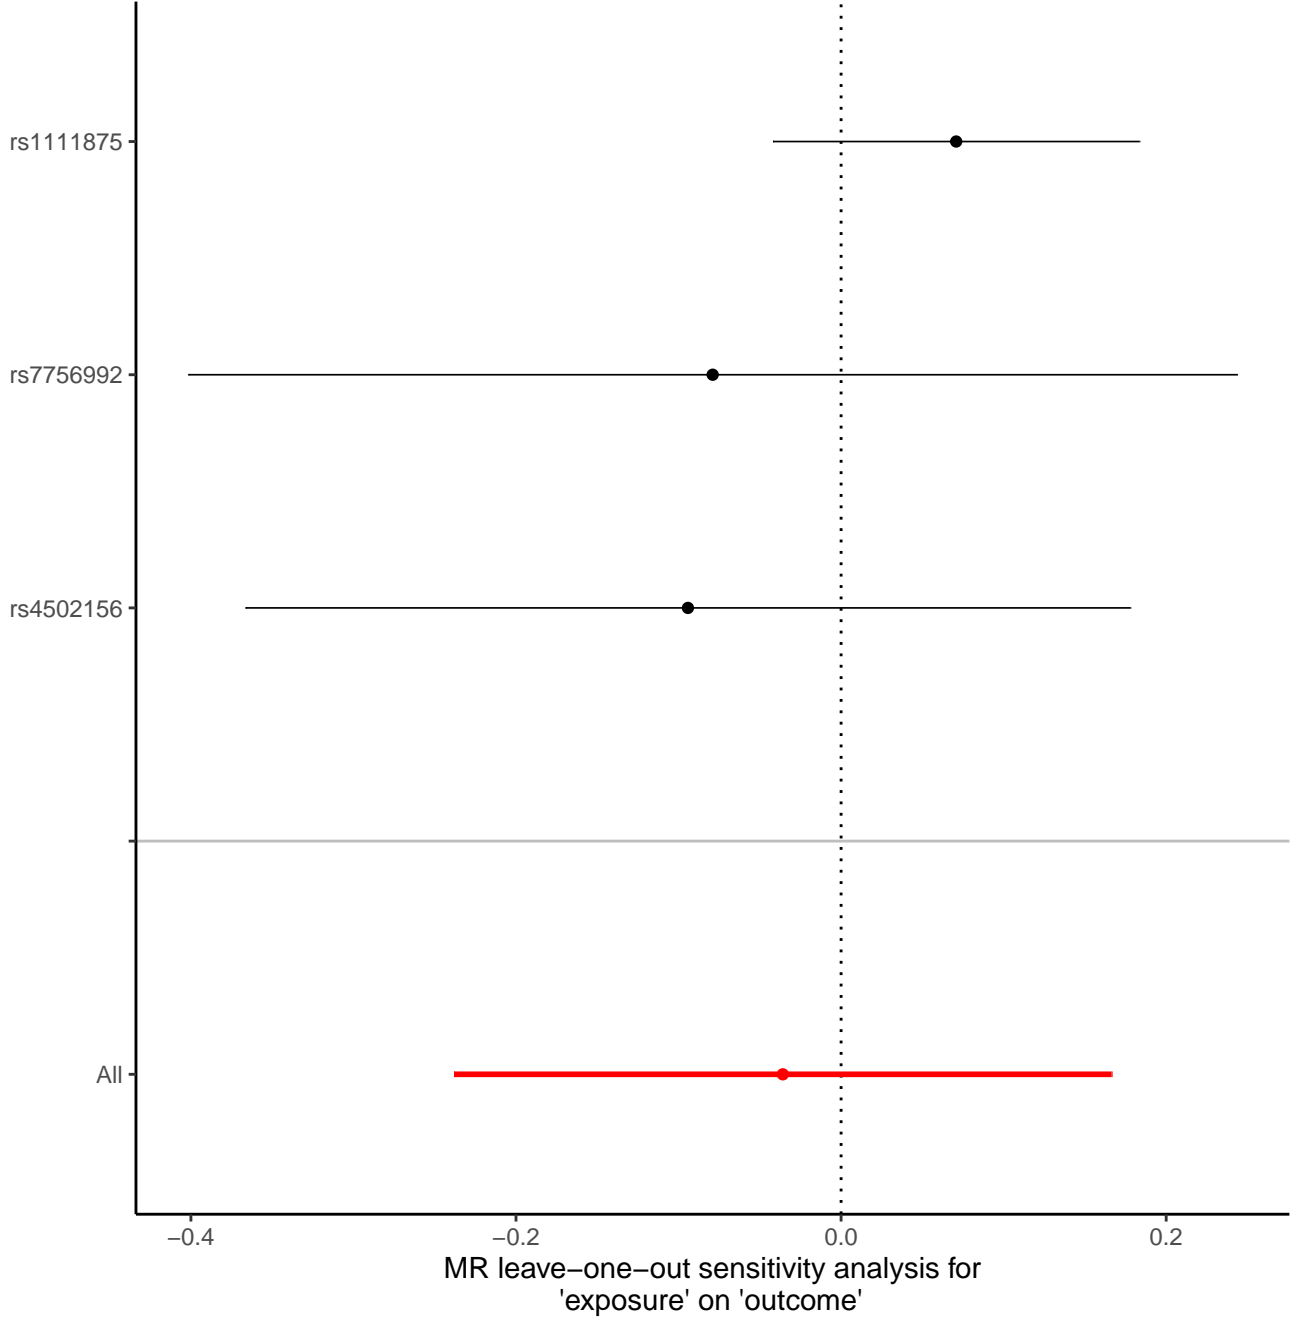

**Exposure: Corrected Insulin Response adjusted for ISI, Outcome: Type 2 Diabetes**  
**Figures of Forest Plot, Comparison of Different MR Methods, Funnel Plot and Leave-one-out Sensitivity Analysis**

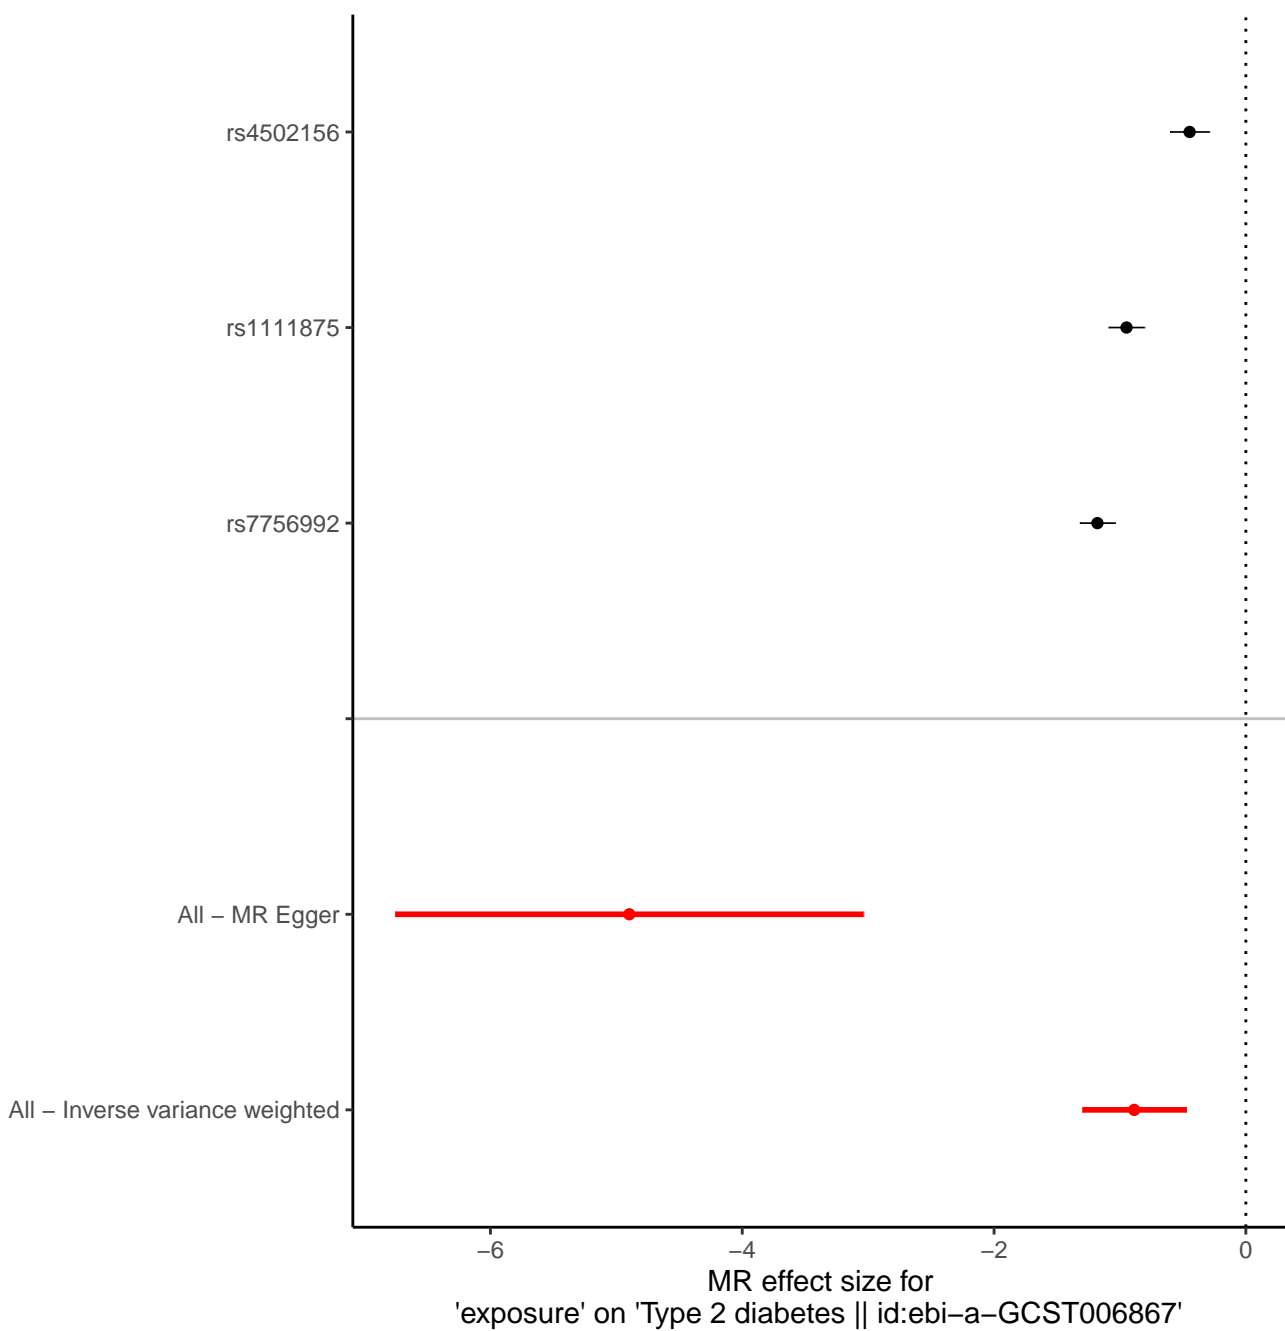

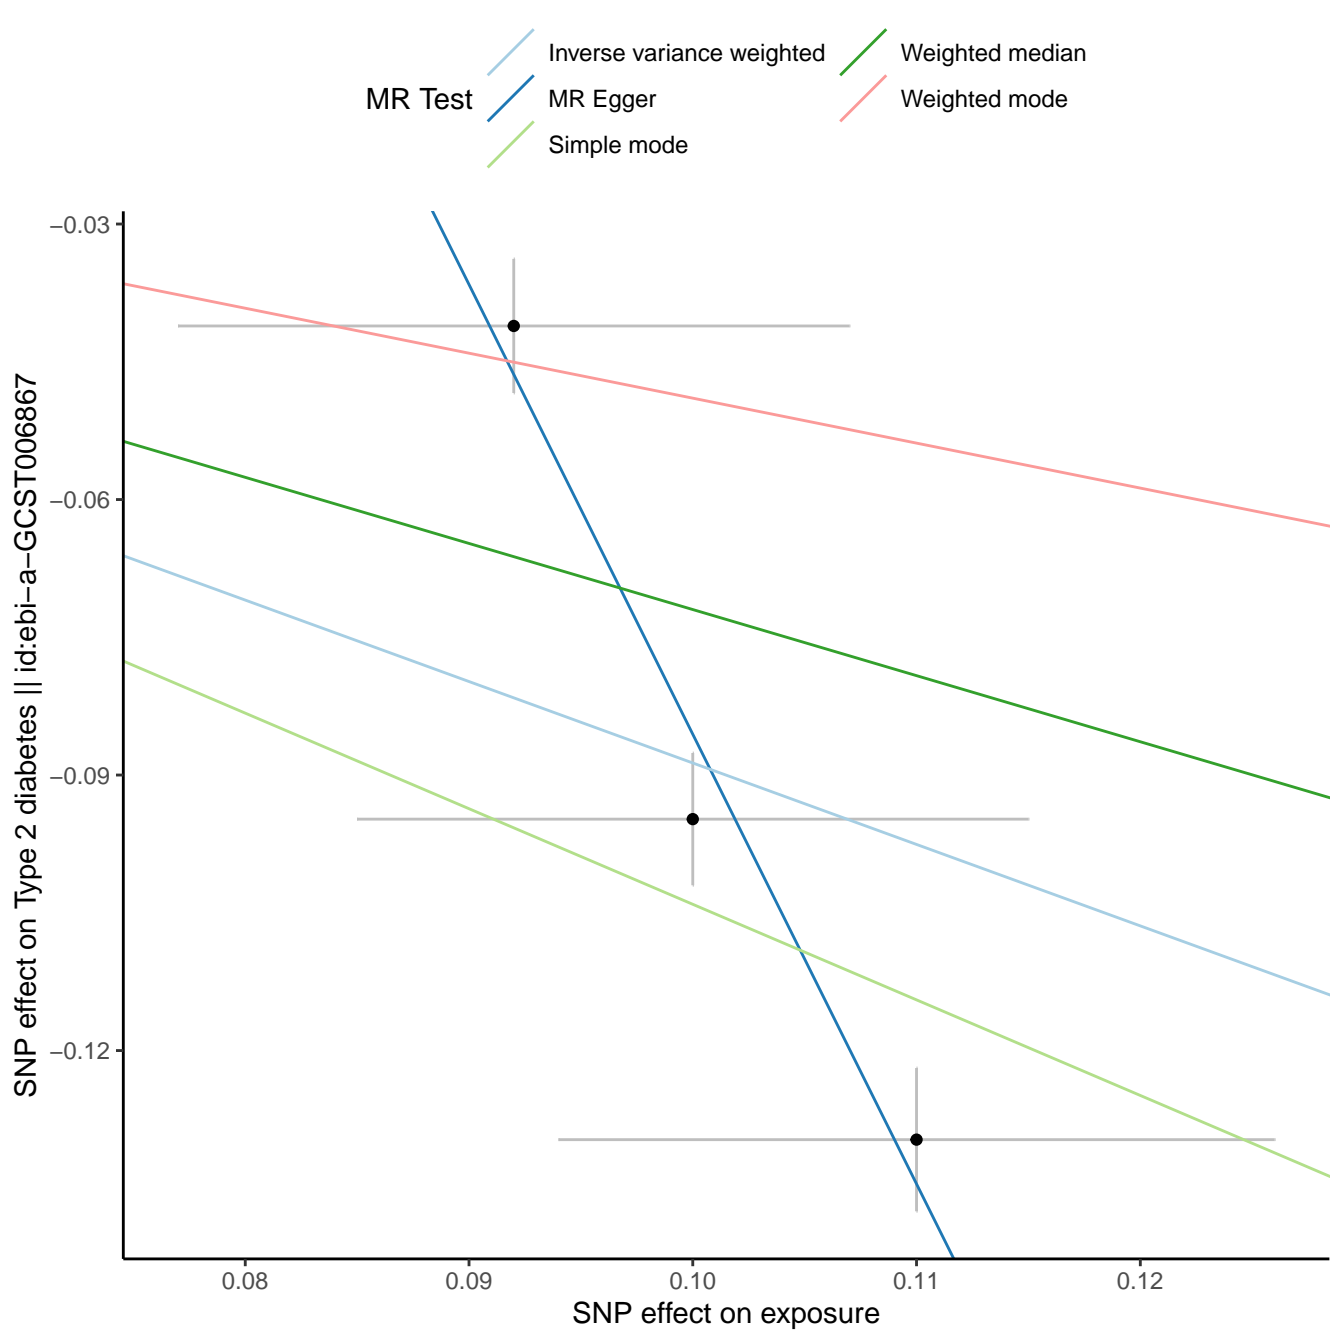

MR Method

Inverse variance weighted

MR Egger

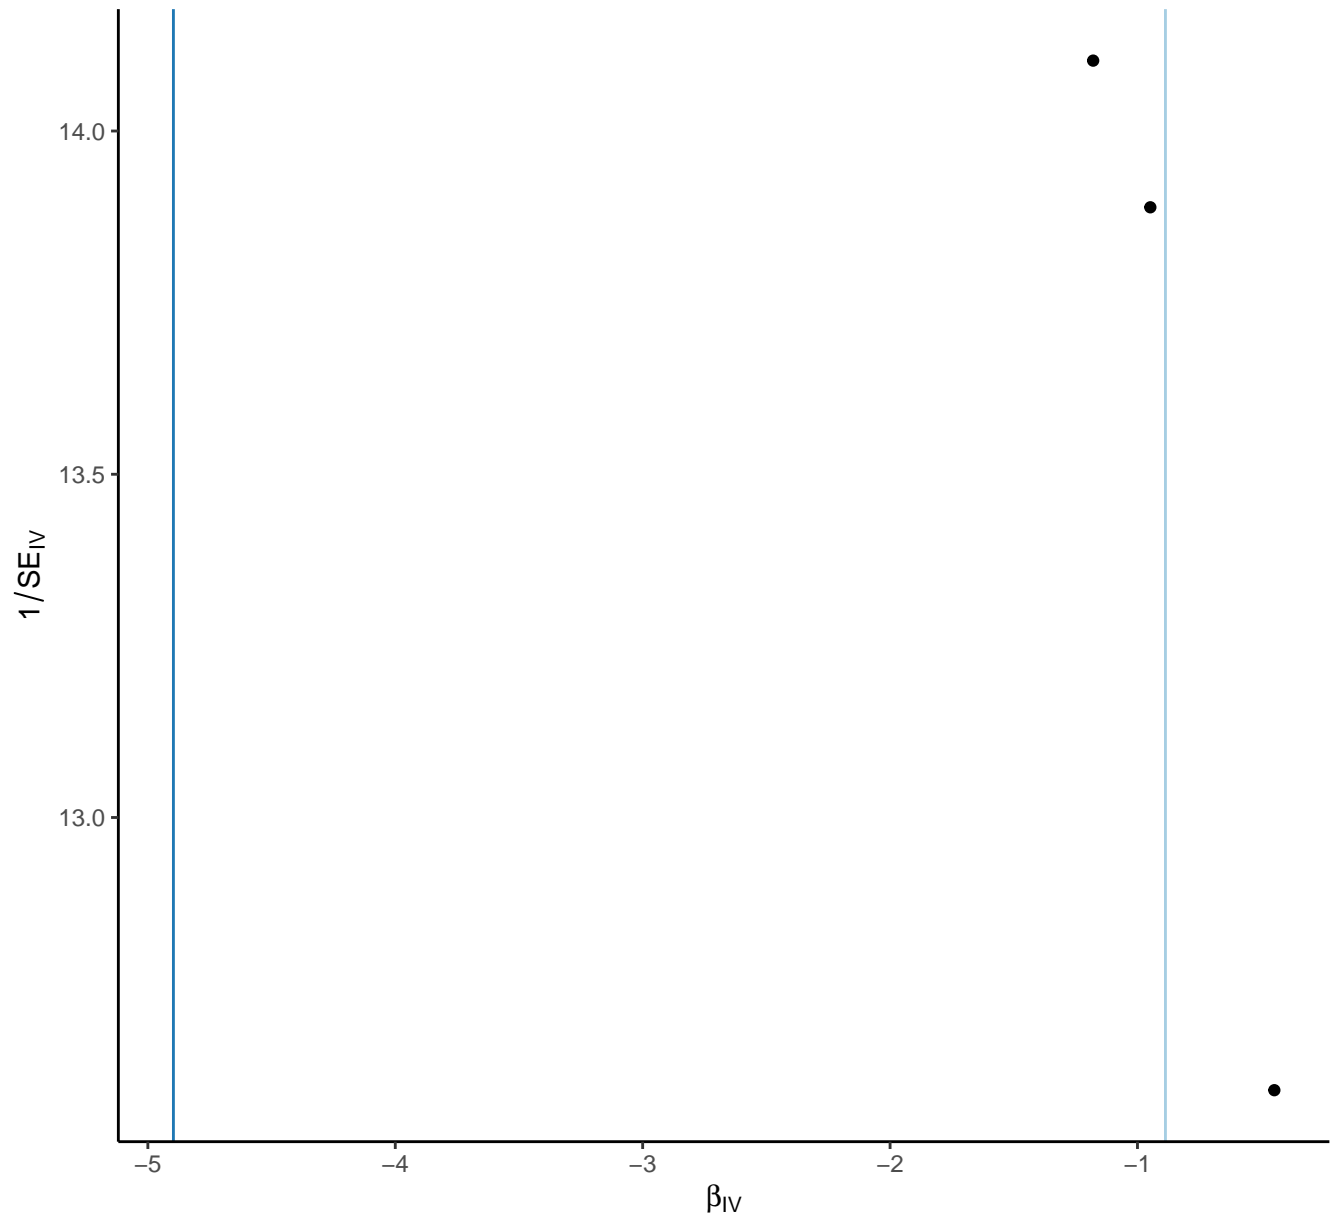



rs7756992

rs1111875

rs4502156

All

-1.5

-1.0

-0.5

0.0

MR leave-one-out sensitivity analysis for  
'exposure' on 'Type 2 diabetes || id:ebi-a-GCST006867'

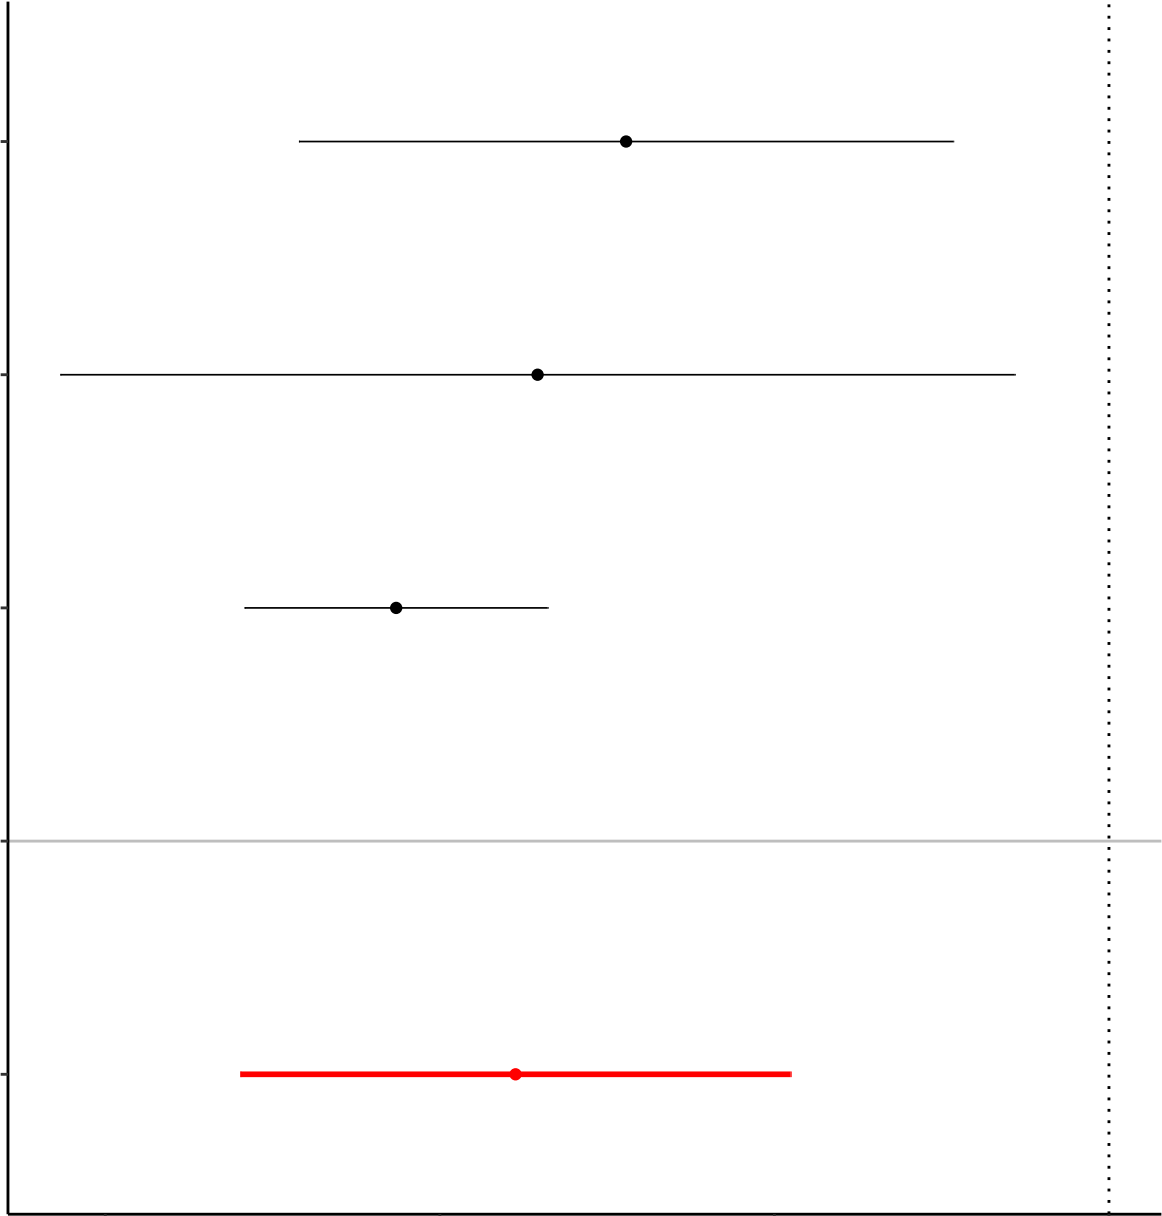

**Exposure: Corrected Insulin Response adjusted for ISI, Outcome: Triglycerides**  
**Figures of Forest Plot, Comparison of Different MR Methods, Funnel Plot and Leave-one-out Sensitivity Analysis**

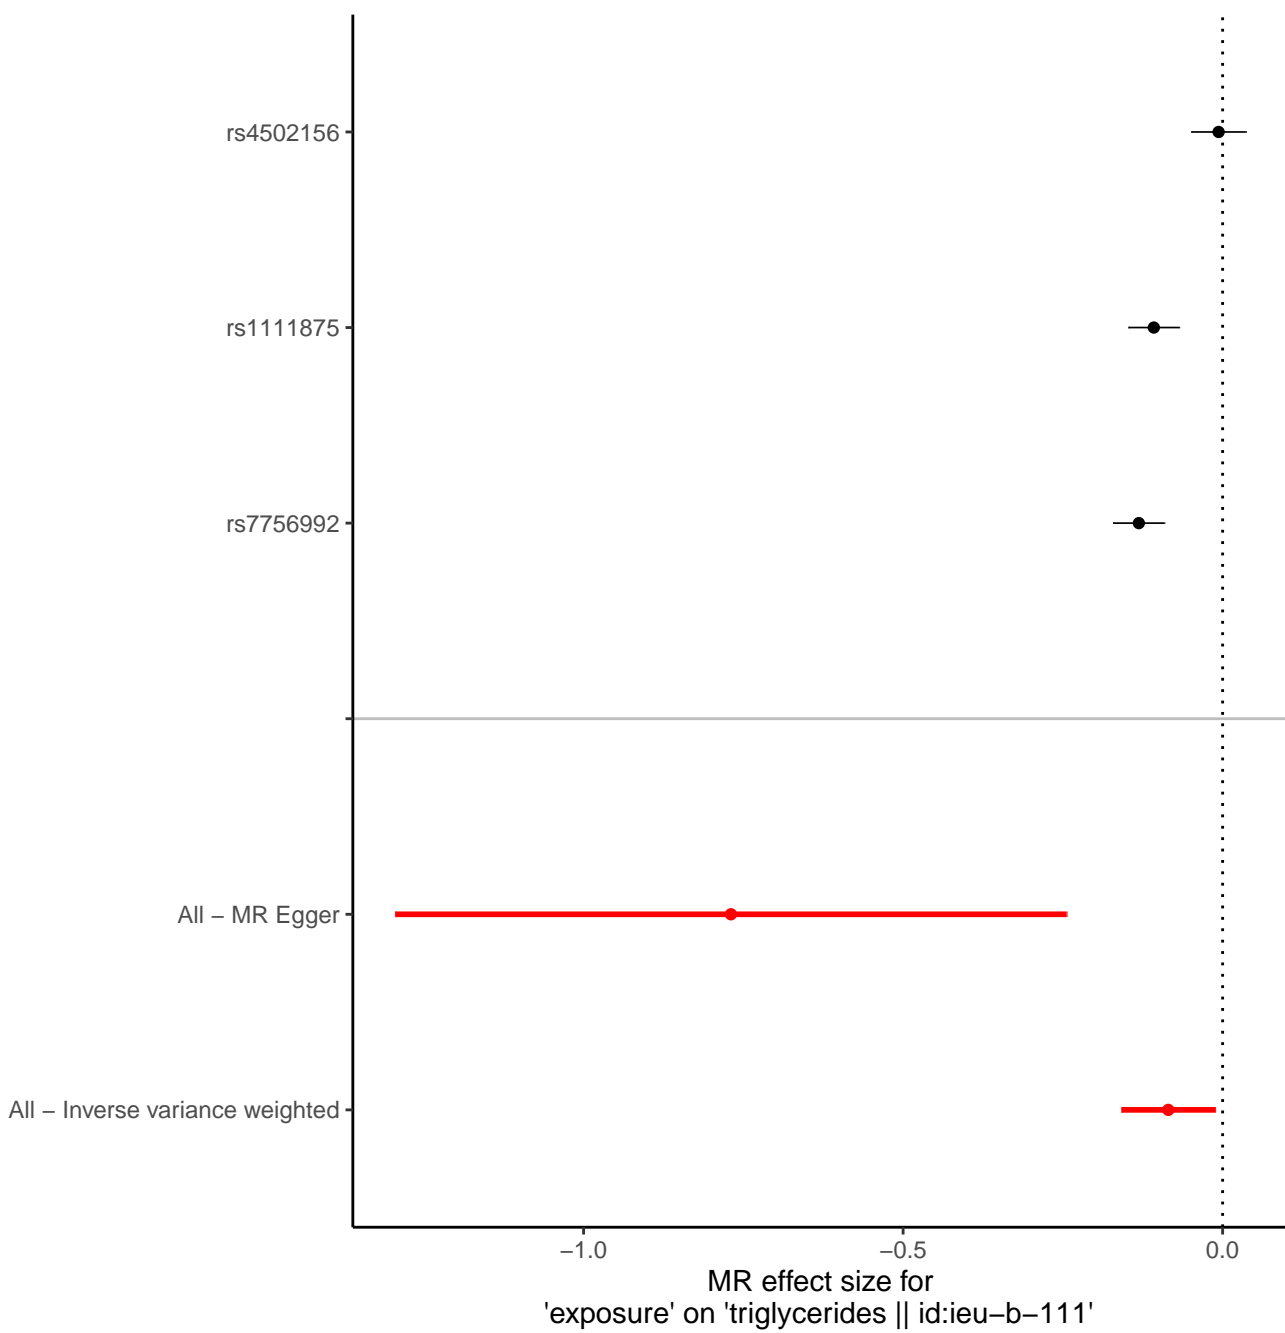

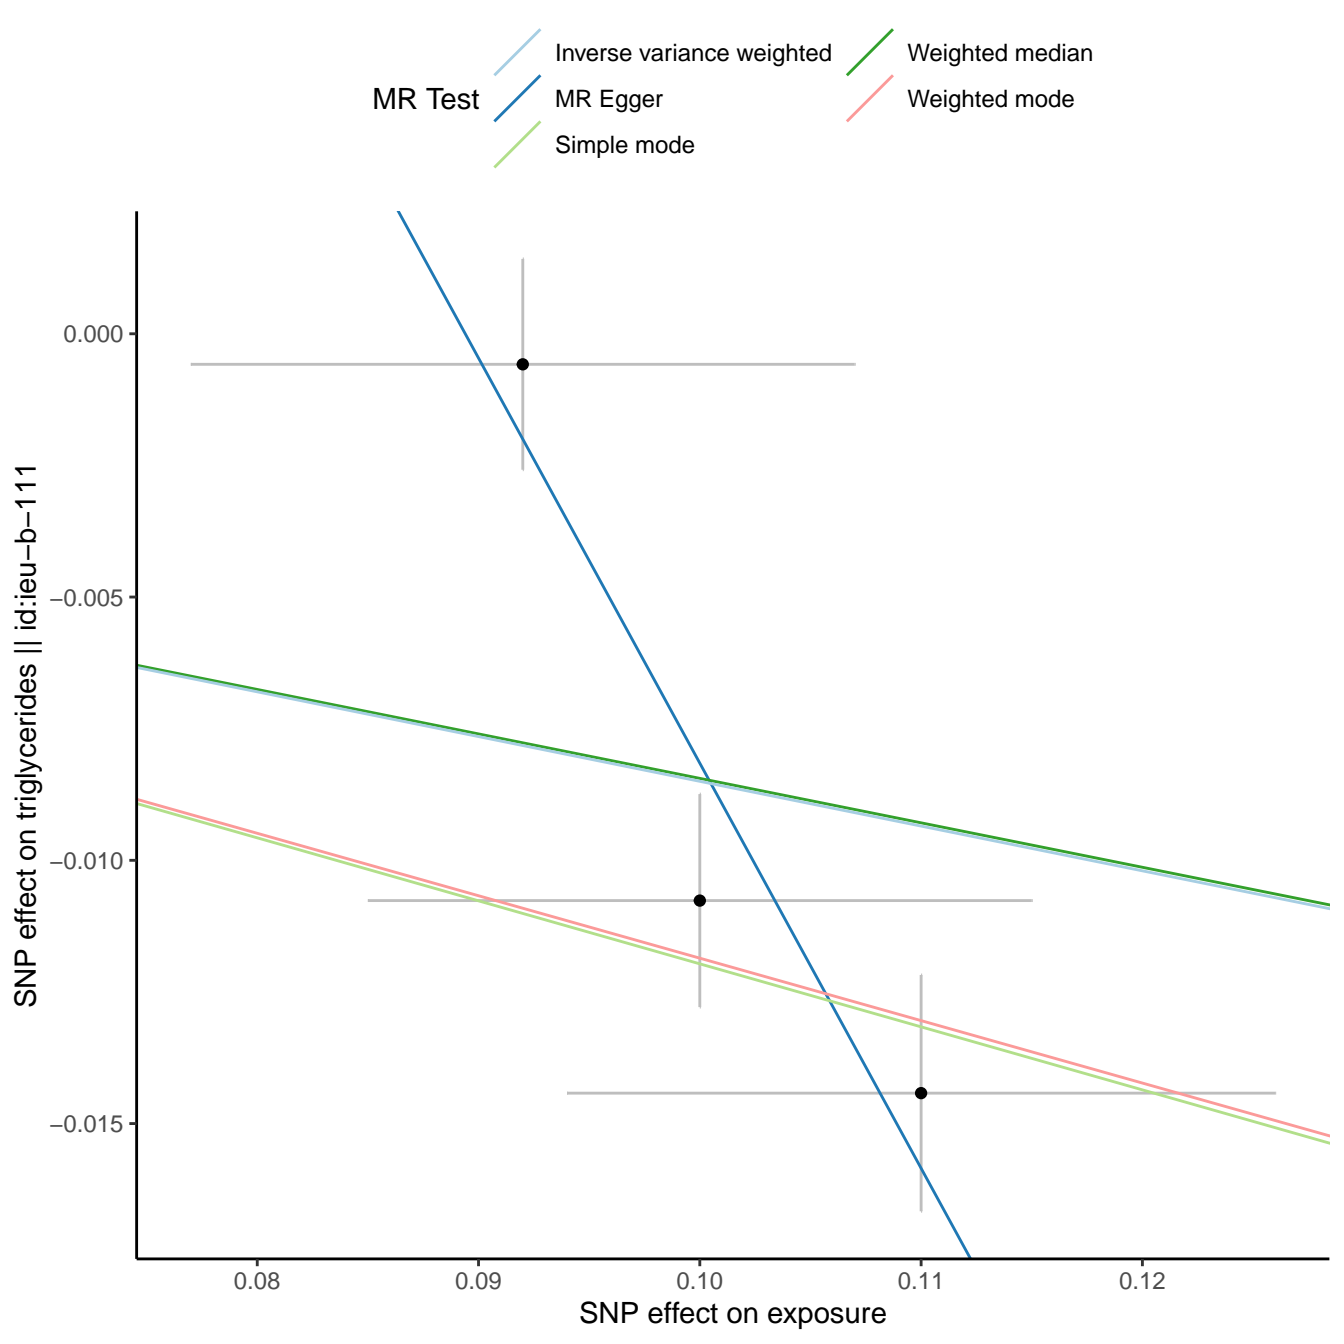

MR Method

Inverse variance weighted

MR Egger

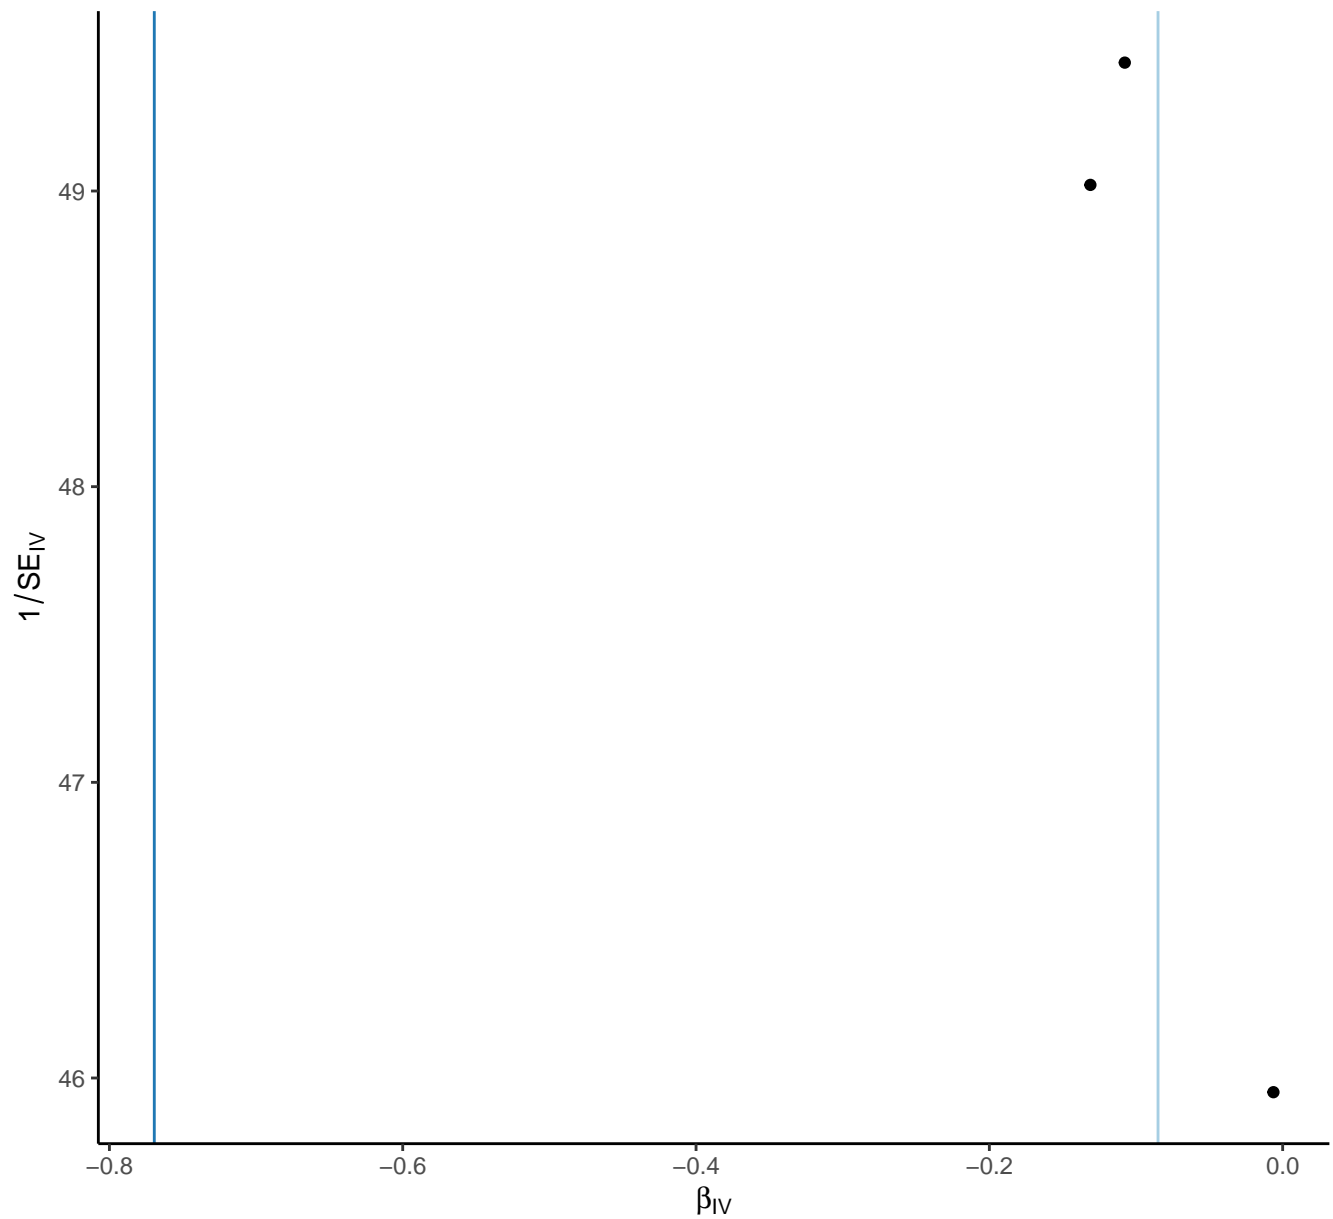

rs7756992

rs1111875

rs4502156

All

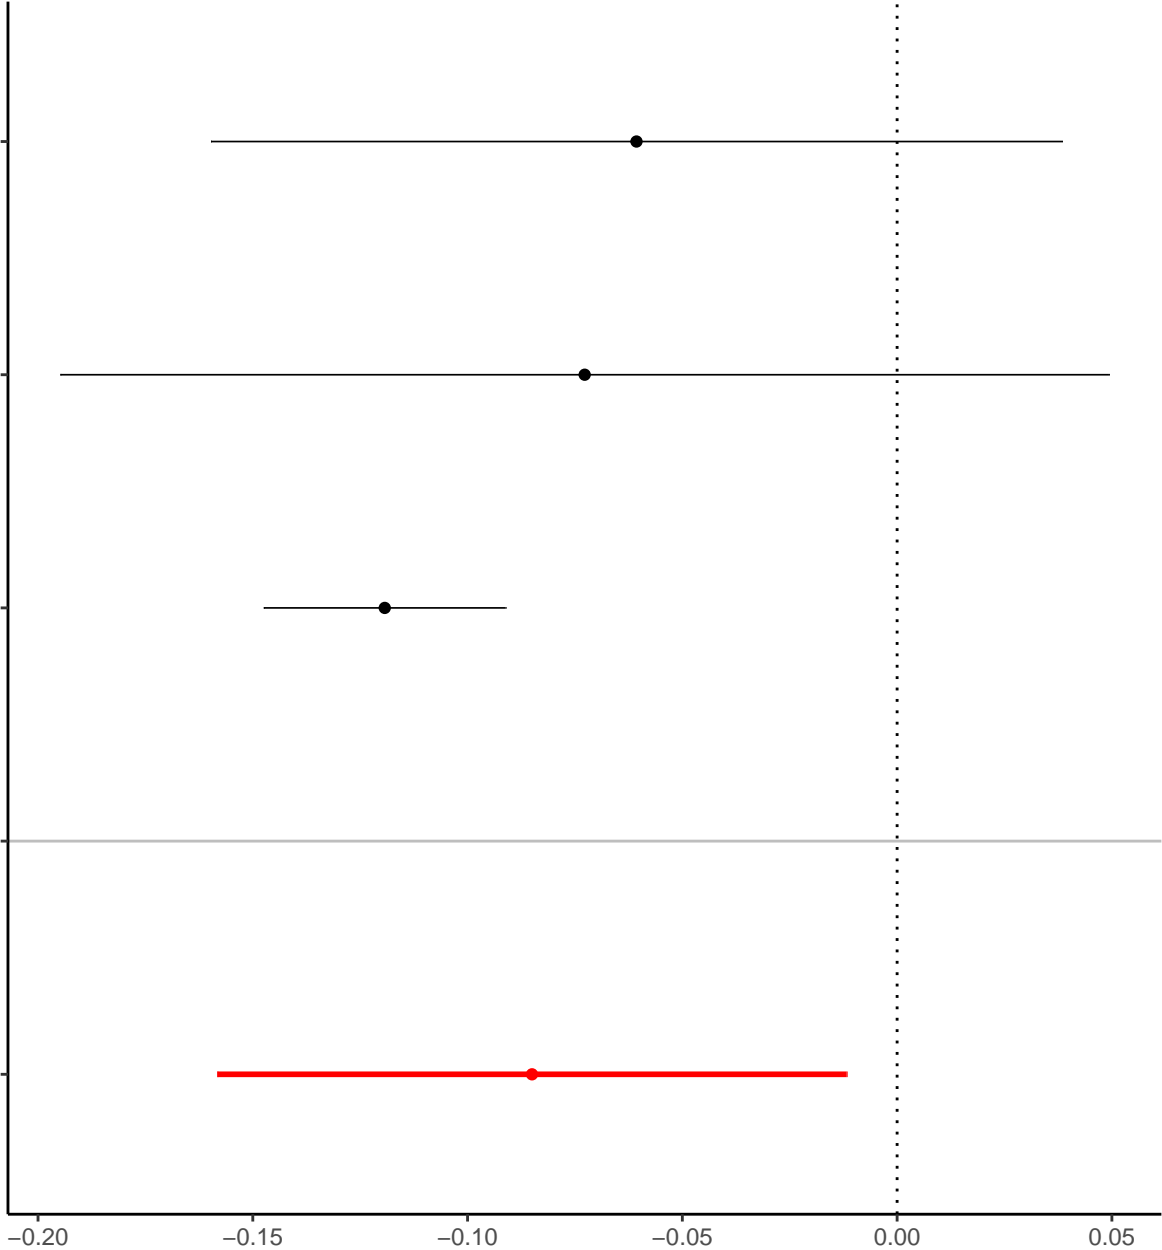

MR leave-one-out sensitivity analysis for 'exposure' on 'triglycerides || id:ieu-b-111'

**Exposure: Corrected Insulin Response adjusted for ISI, Outcome: Waist-Hip Ratio adjusted for Body Mass Index**  
**Figures of Forest Plot, Comparison of Different MR Methods, Funnel Plot and Leave-one-out Sensitivity Analysis**

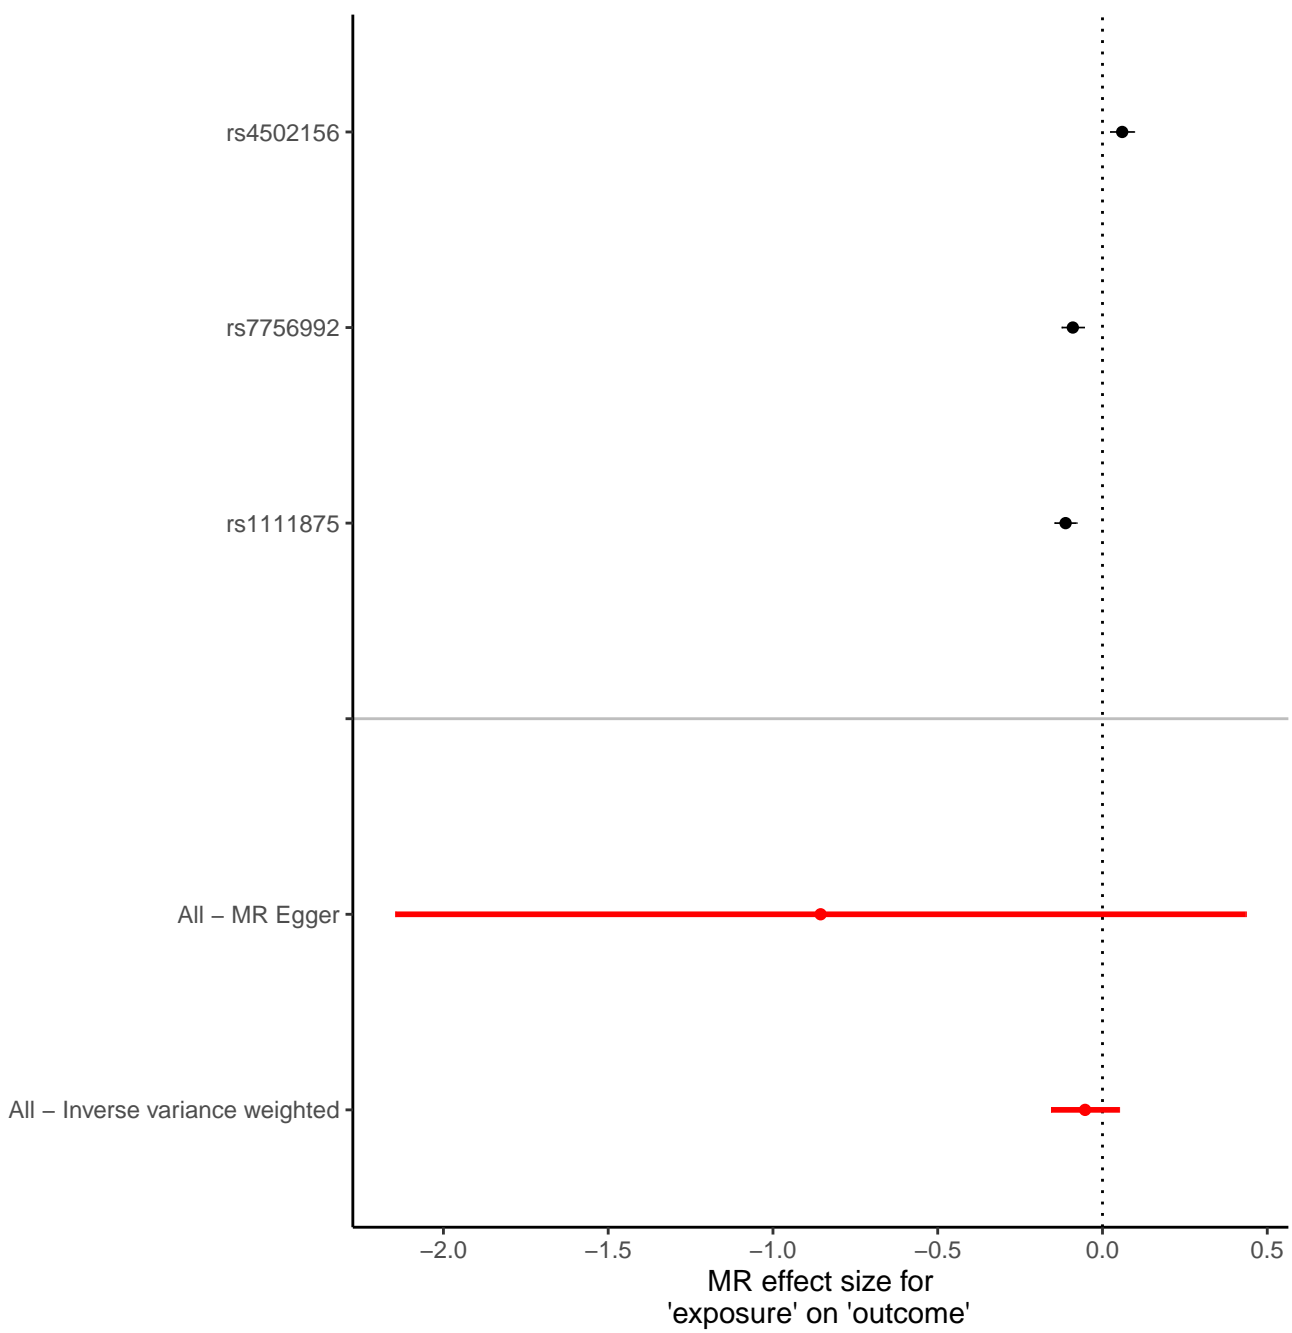



MR Test

- Inverse variance weighted
- MR Egger
- Simple mode
- Weighted median
- Weighted mode

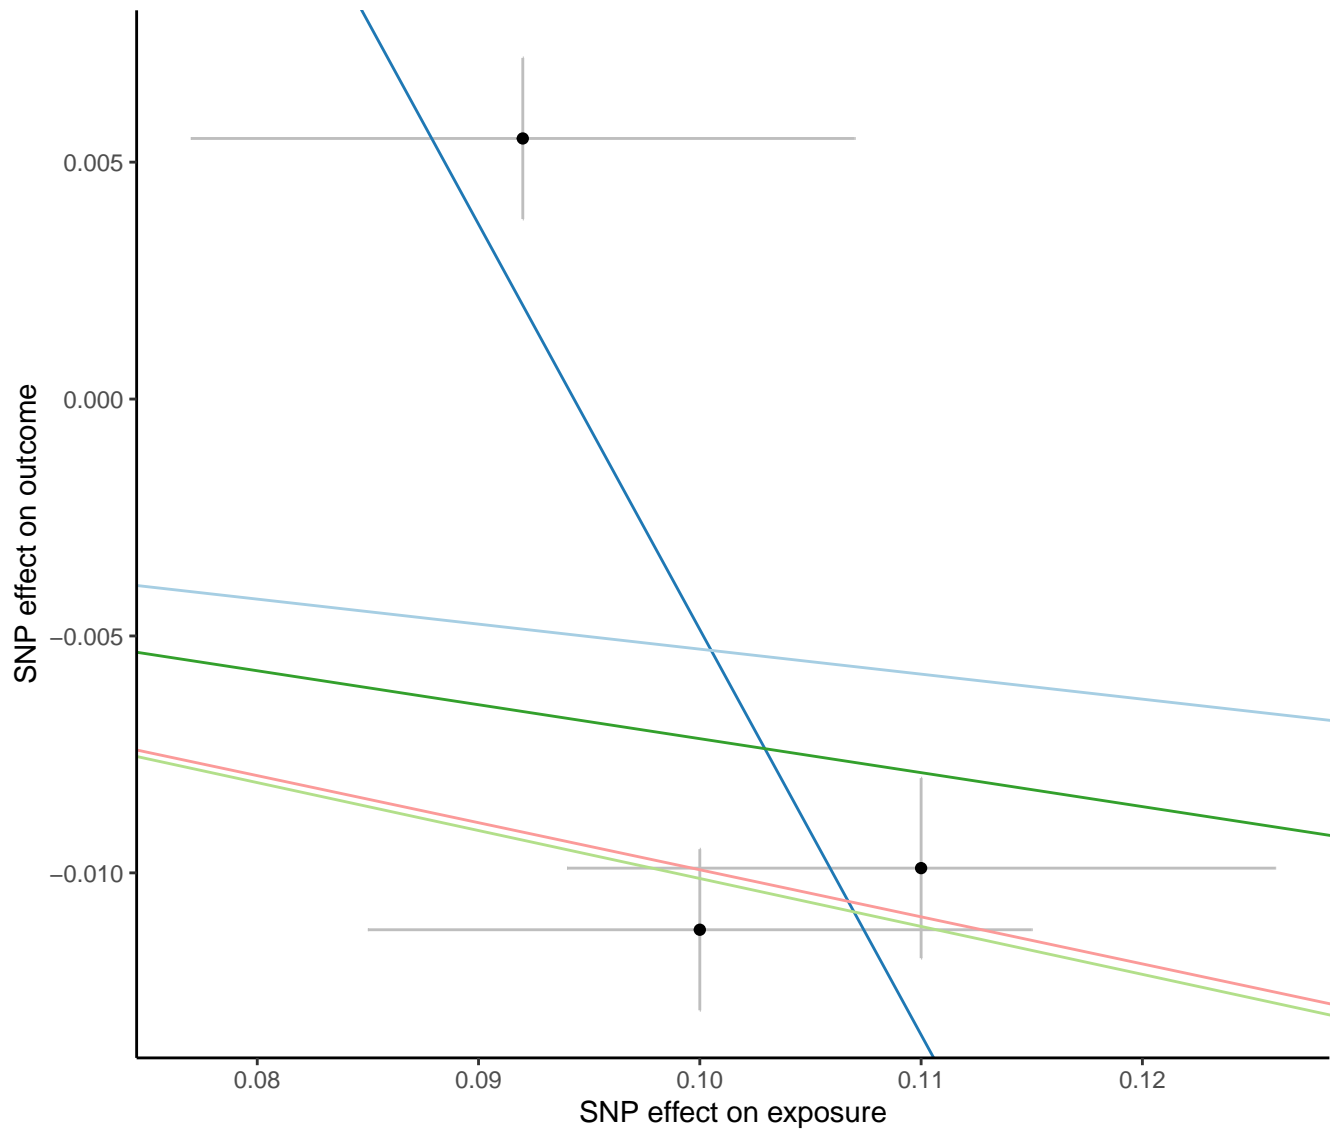

MR Method

Inverse variance weighted

MR Egger

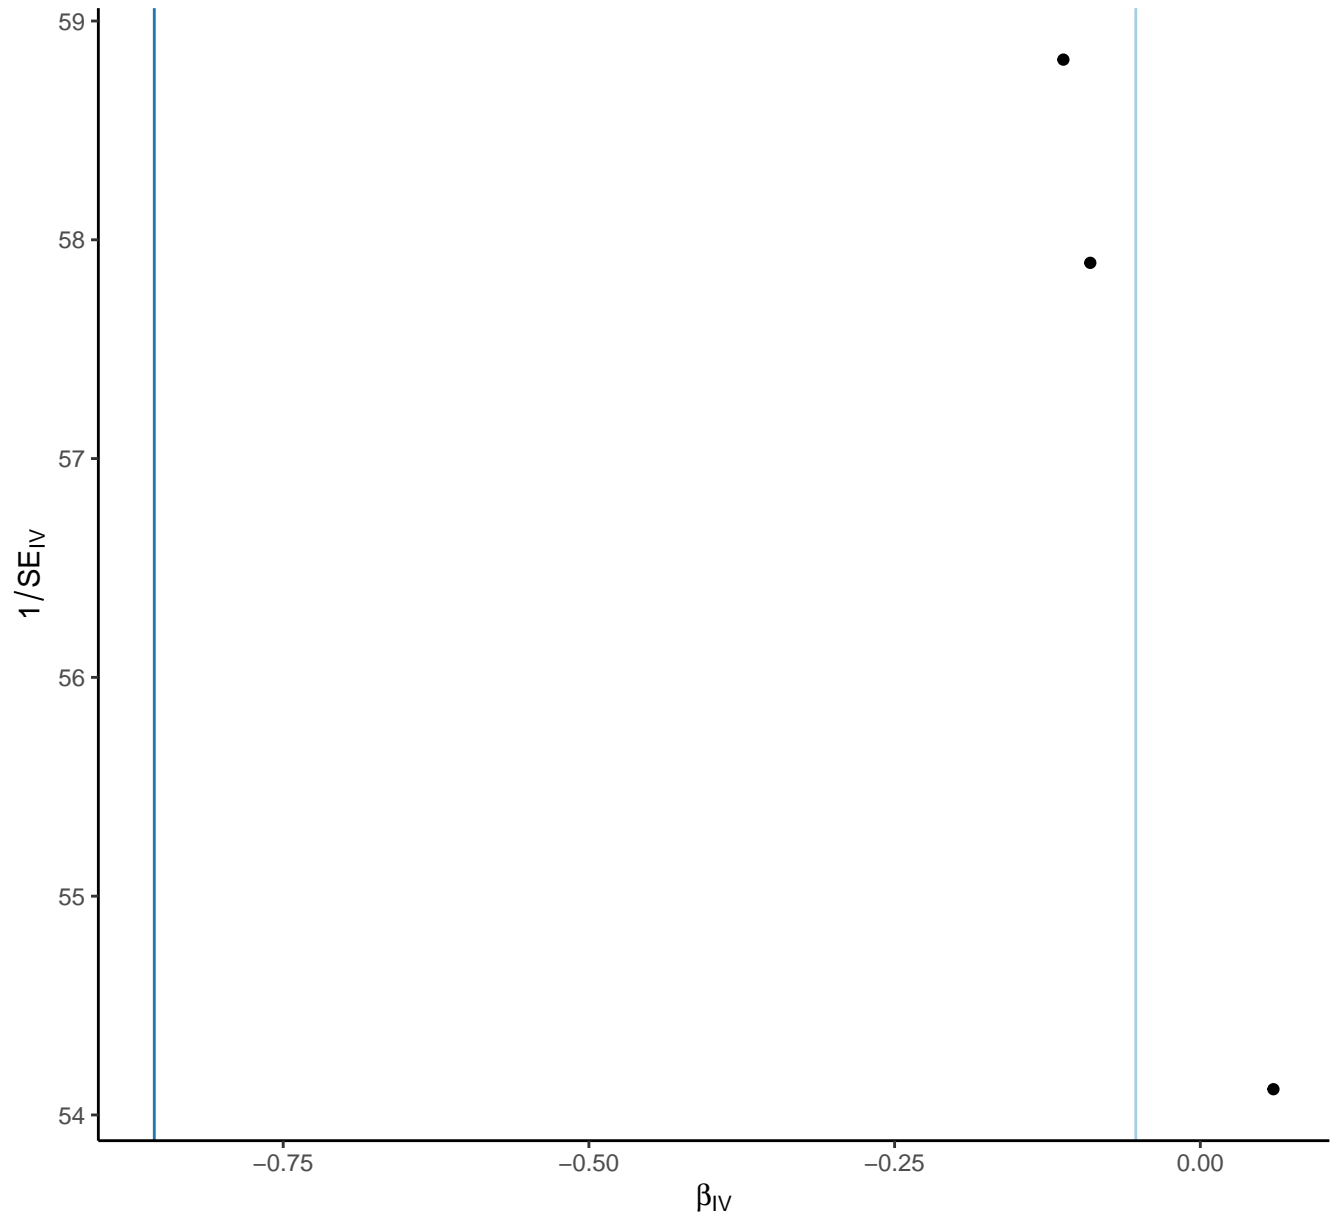

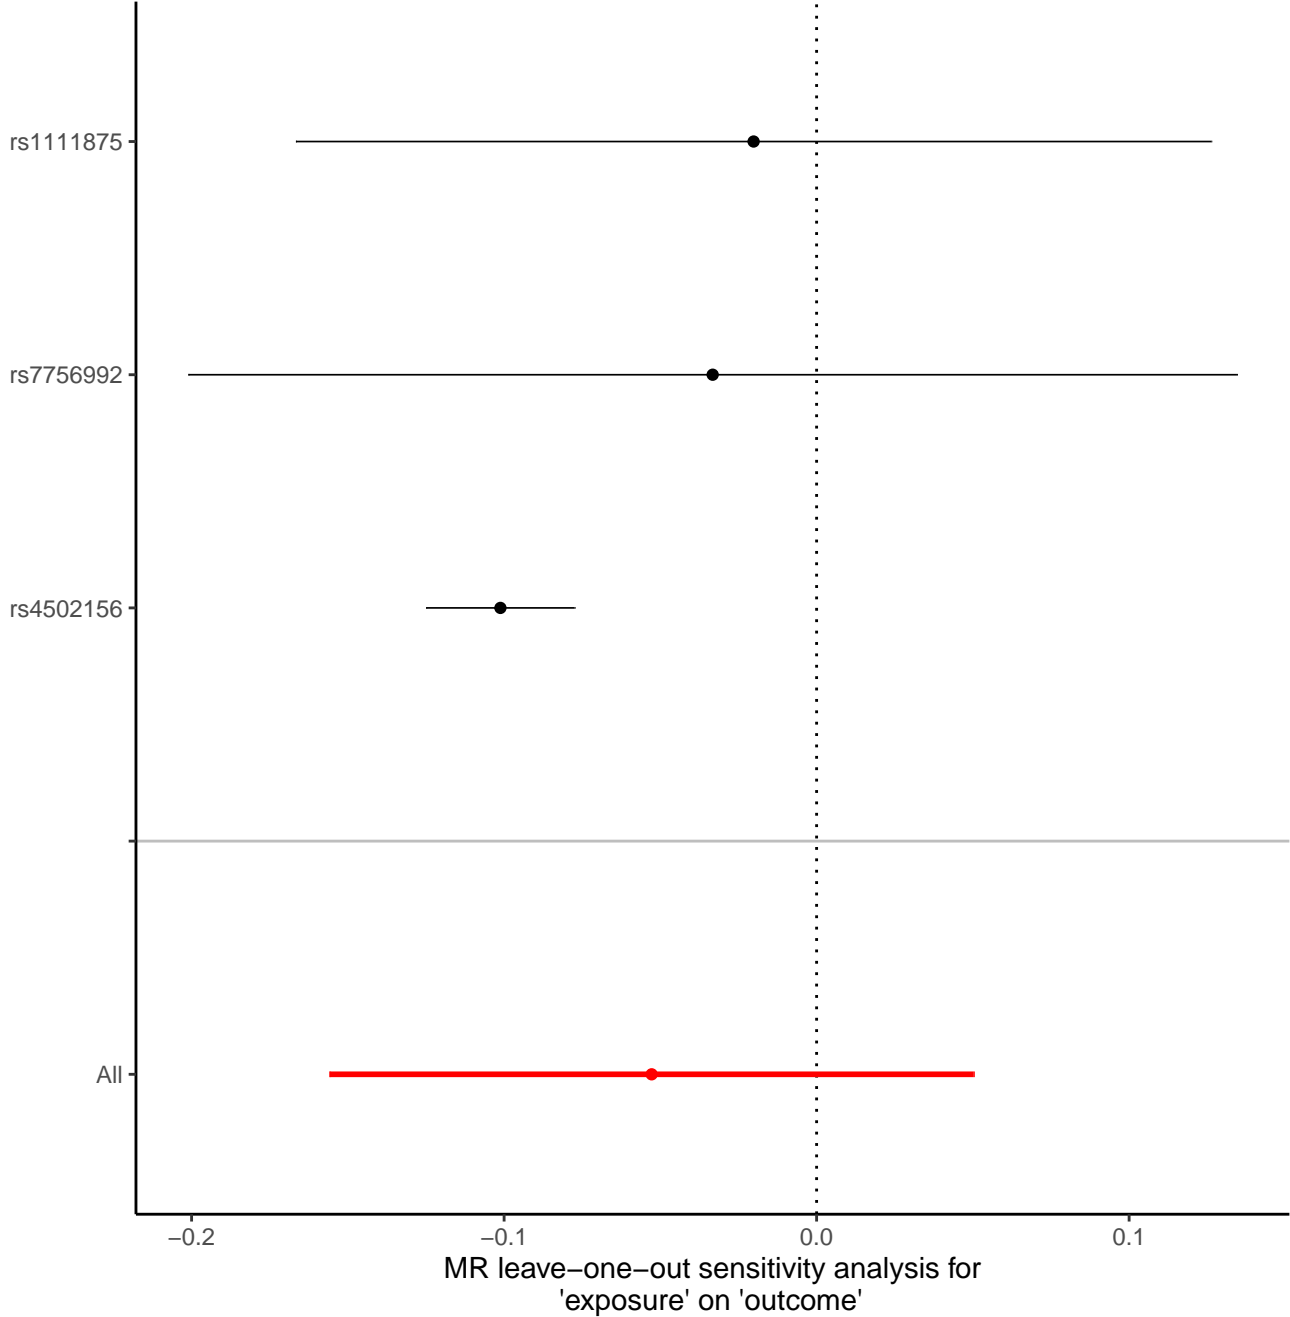

Supplement: Supplementary file 6 [file 2]
