# Supplementary material
Source: publisher figshare collection journal article supplement (https://diabetesjournals.figshare.com/articles/dataset/_/20112998)
Supplement: Supplementary file 1 [file 2]

**Supplementary Table 1: MR analyses of anthropometric and metabolic conditions as exposures and corrected insulin response (CIR) as outcome**

| Method                          | $\beta$ | Standard Error | p     | Egger-Intercept | $p_{\text{Egger}}$ | Cochrane's Q | Q df | $p_Q$ | $I^2$  |
|---------------------------------|---------|----------------|-------|-----------------|--------------------|--------------|------|-------|--------|
| <b>Body Mass Index</b>          |         |                |       |                 |                    |              |      |       |        |
| MR Egger                        | 0.008   | 0.177          | 0.963 | 0.001           | 0.8                | 447.574      | 440  | 0.391 | 1.692  |
| Weighted median                 | 0.001   | 0.111          | 0.992 |                 |                    |              |      |       |        |
| Inverse variance weighted       | 0.05    | 0.068          | 0.461 |                 |                    | 447.639      | 441  | 0.403 | 1.483  |
| Simple mode                     | 0.048   | 0.31           | 0.876 |                 |                    |              |      |       |        |
| Weighted mode                   | -0.036  | 0.182          | 0.844 |                 |                    |              |      |       |        |
| <b>Coronary Artery Disease</b>  |         |                |       |                 |                    |              |      |       |        |
| MR Egger                        | -0.096  | 0.132          | 0.476 | 0.014           | 0.388              | 22.015       | 16   | 0.143 | 27.321 |
| Weighted median                 | -0.046  | 0.067          | 0.499 |                 |                    |              |      |       |        |
| Inverse variance weighted       | 0.009   | 0.057          | 0.875 |                 |                    | 23.099       | 17   | 0.146 | 26.403 |
| Simple mode                     | 0.007   | 0.11           | 0.948 |                 |                    |              |      |       |        |
| Weighted mode                   | -0.028  | 0.068          | 0.688 |                 |                    |              |      |       |        |
| <b>High-Density Lipoprotein</b> |         |                |       |                 |                    |              |      |       |        |
| MR Egger                        | -0.056  | 0.135          | 0.677 | -0.001          | 0.762              | 127.501      | 107  | 0.086 | 16.079 |
| Weighted median                 | -0.022  | 0.136          | 0.871 |                 |                    |              |      |       |        |
| Inverse variance weighted       | -0.087  | 0.089          | 0.327 |                 |                    | 127.611      | 108  | 0.096 | 15.367 |
| Simple mode                     | 0.177   | 0.306          | 0.565 |                 |                    |              |      |       |        |
| Weighted mode                   | 0.011   | 0.122          | 0.928 |                 |                    |              |      |       |        |
| <b>Hypertension</b>             |         |                |       |                 |                    |              |      |       |        |
| MR Egger                        | -9.604  | 4.53           | 0.05  | 0.056           | 0.03               | 11.858       | 16   | 0.754 | -34.93 |
| Weighted median                 | -0.196  | 1.33           | 0.883 |                 |                    |              |      |       |        |
| Inverse variance weighted       | 0.929   | 1.021          | 0.363 |                 |                    | 17.545       | 17   | 0.418 | 3.104  |
| Simple mode                     | -0.766  | 2.097          | 0.719 |                 |                    |              |      |       |        |

|                           |        |       |        |       |       |         |     |       |          |
|---------------------------|--------|-------|--------|-------|-------|---------|-----|-------|----------|
| Weighted mode             | -0.575 | 1.909 | 0.767  |       |       |         |     |       |          |
| Leg Fat Percent Left      |        |       |        |       |       |         |     |       |          |
| MR Egger                  | -0.732 | 0.716 | 0.309  | 0.006 | 0.439 | 119.988 | 132 | 0.765 | -10.011  |
| Weighted median           | -0.461 | 0.271 | 0.089  |       |       |         |     |       |          |
| Inverse variance weighted | -0.197 | 0.191 | 0.304  |       |       | 120.589 | 133 | 0.772 | -10.292  |
| Simple mode               | -0.418 | 0.734 | 0.57   |       |       |         |     |       |          |
| Weighted mode             | -0.549 | 0.538 | 0.31   |       |       |         |     |       |          |
| Leg Fat Percent Right     |        |       |        |       |       |         |     |       |          |
| MR Egger                  | -0.409 | 0.568 | 0.473  | 0.004 | 0.474 | 132.247 | 128 | 0.381 | 3.212    |
| Weighted median           | -0.172 | 0.328 | 0.599  |       |       |         |     |       |          |
| Inverse variance weighted | -0.024 | 0.188 | 0.9    |       |       | 132.78  | 129 | 0.392 | 2.847    |
| Simple mode               | -0.25  | 0.753 | 0.741  |       |       |         |     |       |          |
| Weighted mode             | -0.283 | 0.423 | 0.505  |       |       |         |     |       |          |
| Liver Fat                 |        |       |        |       |       |         |     |       |          |
| MR Egger                  |        |       |        |       |       |         |     |       |          |
| Weighted median           |        |       |        |       |       |         |     |       |          |
| Inverse variance weighted | -0.035 | 0.321 | 0.914  |       |       | 0.157   | 1   | 0.692 | -537.273 |
| Simple mode               |        |       |        |       |       |         |     |       |          |
| Weighted mode             |        |       |        |       |       |         |     |       |          |
| Type 2 Diabetes           |        |       |        |       |       |         |     |       |          |
| MR Egger                  | -0.358 | 0.091 | <0.001 | 0.012 | 0.088 | 155.47  | 95  | 0     | 38.895   |
| Weighted median           | -0.231 | 0.066 | <0.001 |       |       |         |     |       |          |
| Inverse variance weighted | -0.218 | 0.041 | <0.001 |       |       | 160.344 | 96  | 0     | 40.129   |
| Simple mode               | 0.13   | 0.172 | 0.451  |       |       |         |     |       |          |
| Weighted mode             | -0.237 | 0.074 | 0.002  |       |       |         |     |       |          |
| Triglycerides             |        |       |        |       |       |         |     |       |          |

|                                     |        |       |       |       |       |         |     |       |        |
|-------------------------------------|--------|-------|-------|-------|-------|---------|-----|-------|--------|
| MR Egger                            | -0.133 | 0.154 | 0.389 | 0.004 | 0.306 | 127.283 | 99  | 0.029 | 22.221 |
| Weighted median                     | -0.137 | 0.143 | 0.339 |       |       |         |     |       |        |
| Inverse variance weighted           | -0.012 | 0.099 | 0.906 |       |       | 128.642 | 100 | 0.028 | 22.265 |
| Simple mode                         | -0.672 | 0.327 | 0.042 |       |       |         |     |       |        |
| Weighted mode                       | -0.11  | 0.125 | 0.378 |       |       |         |     |       |        |
| <b>BMI-Adjusted Waist-Hip Ratio</b> |        |       |       |       |       |         |     |       |        |
| MR Egger                            | -0.127 | 0.32  | 0.691 | 0.006 | 0.355 | 172.572 | 140 | 0.032 | 18.874 |
| Weighted median                     | 0.344  | 0.165 | 0.037 |       |       |         |     |       |        |
| Inverse variance weighted           | 0.151  | 0.112 | 0.177 |       |       | 173.633 | 141 | 0.032 | 18.794 |
| Simple mode                         | 0.608  | 0.417 | 0.147 |       |       |         |     |       |        |
| Weighted mode                       | 0.582  | 0.408 | 0.155 |       |       |         |     |       |        |

**Supplementary Table 2: Phenome wide  
association study for GIPR variant  
rs11671664**

| <b>Reported Trait</b>                                              | <b>Study N<br/>Initial</b> | <b>Study N<br/>Replication</b> | <b>P-Value</b> | <b>Beta</b> | <b>Beta<br/>CI<br/>Lower</b> | <b>Beta CI<br/>Upper</b> | <b>PMID</b>  |
|--------------------------------------------------------------------|----------------------------|--------------------------------|----------------|-------------|------------------------------|--------------------------|--------------|
| Body mass index                                                    | 158,284                    | 337,300                        | 3.00E-42       | -0.040      | -0.046                       | -0.034                   | 28892<br>062 |
| Body mass index                                                    | 27,715                     | 55,333                         | 6.00E-14       | -4.220      | -5.322                       | -3.118                   | 22344<br>219 |
| Body mass index<br>(SNP x SNP<br>interaction)                      | 26,620                     | 35,625                         | 7.00E-14       | -0.046      | -0.058                       | -0.034                   | 22344<br>221 |
| Body mass index                                                    | 86,739                     | 47,352                         | 3.00E-12       | -0.041      | -0.052                       | -0.029                   | 24861<br>553 |
| Type 2 diabetes                                                    | 183,651                    | 82,027                         | 3.00E-12       | 0.076       | 0.055                        | 0.097                    | 28869<br>590 |
| 2h-glucose post<br>OGTT <sup>a</sup>                               | 11,268                     | 30,620                         | 1.98E-15       | 0.094       | 0.082                        | 0.106                    | 20081<br>857 |
| 2h-glucose post<br>OGTT (adjusted<br>fasting-glucose) <sup>a</sup> | 11,066                     | 29,762                         | 2.56E-20       | 0.107       | 0.095                        | 0.118                    | 20081<br>857 |

<sup>a</sup>Beta provided is for the insulin-reducing allele, GIPR-A, for rs10423928. The insulin-increasing allele of rs10423928, GIPR-T, is in LD with rs11671664 with  $r^2=0.39$ :

([https://ldlink.nci.nih.gov/?var=rs11671664&pop=GBR&genome\\_build=grch37&r2\\_d=r2&window=500000&collapseTranscript=true&tab=ldproxy](https://ldlink.nci.nih.gov/?var=rs11671664&pop=GBR&genome_build=grch37&r2_d=r2&window=500000&collapseTranscript=true&tab=ldproxy), accessed January 22, 2022)

SNP = single nucleotide polymorphism; OGTT = oral glucose tolerance test

**Supplementary Table 3: Phenome wide association study for CDKAL1 variant rs7756992**

| Reported Trait                                             | Study N Initial | Study N Replication | P-Value   | Beta  | Beta CI Lower | Beta CI Upper | Odds Ratio | Odds Ratio CI Lower | Odds Ratio CI Upper | PMID     |
|------------------------------------------------------------|-----------------|---------------------|-----------|-------|---------------|---------------|------------|---------------------|---------------------|----------|
| Type 2 diabetes                                            | 1114458         |                     | 6.00E-128 | 0.12  | 0.11          | 0.13          |            |                     |                     | 32541925 |
| Type 2 diabetes                                            | 898130          |                     | 2.00E-88  |       |               |               | 1.15       | 1.13                | 1.17                | 30297969 |
| Type 2 diabetes                                            | 659316          |                     | 6.00E-62  |       |               |               | 1.14       | 1.12                | 1.16                | 30054458 |
| Type 2 diabetes (adjusted for BMI)                         | 298957          |                     | 1.33E-61  |       |               |               | 1.11       | 1.10                | 1.13                | 29632382 |
| Type 2 diabetes                                            | 298957          |                     | 1.22E-41  |       |               |               | 1.11       | 1.09                | 1.13                | 29632382 |
| Type 2 diabetes                                            | 459000          |                     | 5.00E-31  |       |               |               |            |                     |                     | 30595370 |
| Type 2 diabetes                                            | 110452          | 77138               | 2.00E-26  |       |               |               | 1.20       | 1.16                | 1.24                | 24509480 |
| Birth weight (MTAG)                                        | 182902          |                     | 3.00E-25  | -0.04 | -0.05         | -0.04         |            |                     |                     | 31681408 |
| Psoriasis or type 2 diabetes (trans-disease meta-analysis) | 925490          |                     | 2.00E-20  |       |               |               | 1.11       | 1.09                | 1.13                | 33385400 |
| Birth length (MTAG)                                        | 182902          |                     | 1.00E-19  | -0.06 | -0.07         | -0.05         |            |                     |                     | 31681408 |
| Glycated hemoglobin levels                                 | 88355           |                     | 3.00E-12  | 0.01  | 0.01          | 0.02          |            |                     |                     | 28898252 |
| Type 2 diabetes                                            | 8686            | 9461                | 8.00E-09  |       |               |               | 1.20       | 1.13                | 1.28                | 17460697 |
| Type 2 diabetes [additive model]                           | 117775          |                     | 1.00E-08  |       |               |               | 1.15       | 1.10                | 1.21                | 26961502 |
| Infant head circumference (MTAG)                           | 182902          |                     | 2.00E-08  | -0.07 | -0.09         | -0.04         |            |                     |                     | 31681408 |

**Supplementary Table 4: Instrument used for corrected insulin response adjusted for insulin sensitivity (CIRadjISI)**

| SNP       | Gene                        | Effect Allele | Other Allele | EAF  | beta   | se    |
|-----------|-----------------------------|---------------|--------------|------|--------|-------|
| rs7756992 | <i>CDKAL1</i>               | G             | A            | 0.27 | -0.11  | 0.016 |
| rs1111875 | HHEX                        | C             | T            | 0.59 | -0.1   | 0.015 |
| rs4502156 | <i>C2CD4A/ NLF1/ VPS13C</i> | T             | C            | 0.57 | -0.092 | 0.015 |

*SNP=single nucleotide polymorphism, Gene=nearest gene, EAF=effect allele frequency, beta=regression coefficient, se=standard error of regression coefficient*

**Supplementary Table 5: MR analyses of corrected insulin response adjusted for insulin sensitivity (CIRadjISI) as exposure and anthropometric and metabolic traits as outcomes**

| Method                          | $\beta$ | Standard Error | p      | Egger-Intercept | $p_{\text{Egger}}$ | Cochrane's Q | Q df | $p_Q$  | $I^2$        |
|---------------------------------|---------|----------------|--------|-----------------|--------------------|--------------|------|--------|--------------|
| <b>Body Mass Index</b>          |         |                |        |                 |                    |              |      |        |              |
| MR Egger                        | 0.622   | 0.134          | 0.135  | -0.059          | 0.142              | 0.262        | 1    | 0.609  | -<br>281.853 |
| Weighted median                 | 0.031   | 0.016          | 0.062  |                 |                    |              |      |        |              |
| Inverse variance weighted       | 0.033   | 0.03           | 0.268  |                 |                    | 19.756       | 2    | <0.001 | 89.876       |
| Simple mode                     | 0.049   | 0.026          | 0.206  |                 |                    |              |      |        |              |
| Weighted mode                   | 0.039   | 0.026          | 0.27   |                 |                    |              |      |        |              |
| <b>High-Density Lipoprotein</b> |         |                |        |                 |                    |              |      |        |              |
| MR Egger                        | 0.266   | 0.542          | 0.709  | -0.023          | 0.746              | 11.444       | 1    | <0.001 | 91.261       |
| Weighted median                 | 0.027   | 0.018          | 0.145  |                 |                    |              |      |        |              |
| Inverse variance weighted       | 0.038   | 0.03           | 0.204  |                 |                    | 13.482       | 2    | <0.001 | 85.166       |
| Simple mode                     | 0.021   | 0.028          | 0.524  |                 |                    |              |      |        |              |
| Weighted mode                   | 0.019   | 0.026          | 0.551  |                 |                    |              |      |        |              |
| <b>Leg Fat Percent Left</b>     |         |                |        |                 |                    |              |      |        |              |
| MR Egger                        | 0.087   | 0.106          | 0.562  | -0.006          | 0.683              | 0.855        | 1    | 0.355  | -16.96       |
| Weighted median                 | 0.029   | 0.01           | 0.002  |                 |                    |              |      |        |              |
| Inverse variance weighted       | 0.03    | 0.008          | 0      |                 |                    | 1.15         | 2    | 0.563  | -73.925      |
| Simple mode                     | 0.031   | 0.012          | 0.129  |                 |                    |              |      |        |              |
| Weighted mode                   | 0.028   | 0.012          | 0.15   |                 |                    |              |      |        |              |
| <b>Leg Fat Percent Right</b>    |         |                |        |                 |                    |              |      |        |              |
| MR Egger                        | 0.09    | 0.107          | 0.554  | -0.006          | 0.672              | 0.441        | 1    | 0.507  | -<br>126.996 |
| Weighted median                 | 0.028   | 0.01           | 0.004  |                 |                    |              |      |        |              |
| Inverse variance weighted       | 0.03    | 0.008          | <0.001 |                 |                    | 0.761        | 2    | 0.683  | -<br>162.701 |

|                                     |        |       |        |       |       |        |   |        |        |
|-------------------------------------|--------|-------|--------|-------|-------|--------|---|--------|--------|
| Simple mode                         | 0.027  | 0.012 | 0.159  |       |       |        |   |        |        |
| Weighted mode                       | 0.026  | 0.012 | 0.164  |       |       |        |   |        |        |
| <b>Liver Fat</b>                    |        |       |        |       |       |        |   |        |        |
| MR Egger                            | -0.224 | 2.028 | 0.93   | 0.019 | 0.941 | 9.867  | 1 | 0.002  | 89.865 |
| Weighted median                     | 0.045  | 0.069 | 0.509  |       |       |        |   |        |        |
| Inverse variance weighted           | -0.036 | 0.103 | 0.728  |       |       | 9.953  | 2 | 0.007  | 79.905 |
| Simple mode                         | 0.073  | 0.078 | 0.448  |       |       |        |   |        |        |
| Weighted mode                       | 0.07   | 0.078 | 0.462  |       |       |        |   |        |        |
| <b>Triglycerides</b>                |        |       |        |       |       |        |   |        |        |
| MR Egger                            | -0.769 | 0.268 | 0.213  | 0.069 | 0.237 | 2.572  | 1 | 0.109  | 61.121 |
| Weighted median                     | -0.084 | 0.018 | <0.001 |       |       |        |   |        |        |
| Inverse variance weighted           | -0.085 | 0.037 | 0.023  |       |       | 19.44  | 2 | <0.001 | 89.712 |
| Simple mode                         | -0.12  | 0.024 | 0.038  |       |       |        |   |        |        |
| Weighted mode                       | -0.119 | 0.031 | 0.063  |       |       |        |   |        |        |
| <b>BMI-Adjusted Waist-Hip Ratio</b> |        |       |        |       |       |        |   |        |        |
| MR Egger                            | -0.855 | 0.658 | 0.418  | 0.081 | 0.437 | 21.609 | 1 | <0.001 | 95.372 |
| Weighted median                     | -0.072 | 0.018 | <0.001 |       |       |        |   |        |        |
| Inverse variance weighted           | -0.053 | 0.053 | 0.316  |       |       | 53.886 | 2 | <0.001 | 96.288 |
| Simple mode                         | -0.101 | 0.018 | 0.03   |       |       |        |   |        |        |
| Weighted mode                       | -0.099 | 0.018 | 0.032  |       |       |        |   |        |        |



**Supplementary Table 6: MR analyses of corrected insulin response adjusted for insulin sensitivity (CIRadjISI) as exposure and categorical traits (Coronary Artery Disease, Hypertension, Type 2 Diabetes) as outcomes**

| Method                         | $\beta$ | Standard Error | p     | Odds Ratio (95% CI)   | Egger-Intercept | p <sub>Egger</sub> | Cochrane's Q | Q df | p <sub>Q</sub> | I <sup>2</sup> |
|--------------------------------|---------|----------------|-------|-----------------------|-----------------|--------------------|--------------|------|----------------|----------------|
| <b>Coronary Artery Disease</b> |         |                |       |                       |                 |                    |              |      |                |                |
| MR Egger                       | -2.206  | 1.186          | 0.314 | 0.110 (0.011, 1.127)  | 0.206           | 0.333              | 0.497        | 1    | 0.481          | 101.023        |
| Weighted median                | -0.228  | 0.113          | 0.044 | 0.796 (0.641, 0.989)  |                 |                    |              |      |                |                |
| Inverse variance weighted      | -0.156  | 0.112          | 0.163 | 0.063 (0.855, 0.687)  |                 |                    | 3.497        | 2    | 0.174          | 42.812         |
| Simple mode                    | -0.26   | 0.148          | 0.221 | 0.771 (0.581, 1.024)  |                 |                    |              |      |                |                |
| Weighted mode                  | -0.258  | 0.156          | 0.24  | 0.772 (0.578, 1.033)  |                 |                    |              |      |                |                |
| <b>Hypertension</b>            |         |                |       |                       |                 |                    |              |      |                |                |
| MR Egger                       | -0.091  | 0.176          | 0.696 | 0.913 (0.646, 1.289)  | 0.009           | 0.702              | 9.899        | 1    | 0.002          | 89.898         |
| Weighted median                | -0.004  | 0.007          | 0.562 | 0.996 (0.983, 1.009)  |                 |                    |              |      |                |                |
| Inverse variance weighted      | -0.003  | 0.01           | 0.801 | 0.997 (0.978, 1.017)  |                 |                    | 12.425       | 2    | 0.002          | 83.904         |
| Simple mode                    | -0.008  | 0.01           | 0.521 | 0.992 (0.972, 1.012)  |                 |                    |              |      |                |                |
| Weighted mode                  | -0.007  | 0.011          | 0.576 | 0.993 (0.971, 1.015)  |                 |                    |              |      |                |                |
| <b>Type 2 Diabetes</b>         |         |                |       |                       |                 |                    |              |      |                |                |
| MR Egger                       | -4.897  | 0.948          | 0.122 | 0.007, (0.001, 0.048) | 0.404           | 0.147              | 2.554        | 1    | 0.11           | 60.851         |

|                           |        |       |        |                         |  |  |        |   |        |        |
|---------------------------|--------|-------|--------|-------------------------|--|--|--------|---|--------|--------|
| Weighted median           | -0.72  | 0.095 | <0.001 | 0.487<br>(0.403, 0.589) |  |  |        |   |        |        |
| Inverse variance weighted | -0.887 | 0.21  | <0.001 | 0.412<br>(0.273, 0.621) |  |  | 48.472 | 2 | <0.001 | 95.874 |
| Simple mode               | -1.041 | 0.187 | 0.031  | 0.353<br>(0.244, 0.510) |  |  |        |   |        |        |
| Weighted mode             | -0.49  | 0.129 | 0.063  | 0.613<br>(0.491, 0.765) |  |  |        |   |        |        |

**Supplementary Table 7. MR analyses of anthropometric and metabolic conditions as exposures and corrected insulin response adjusted for insulin sensitivity (CIRadjISI) as outcome**

| Method                          | $\beta$ | Standard Error | p     | Egger-Intercept | $p_{\text{Egger}}$ | Cochrane's Q | Q df | $p_Q$ | $I^2$   |
|---------------------------------|---------|----------------|-------|-----------------|--------------------|--------------|------|-------|---------|
| <b>Body Mass Index</b>          |         |                |       |                 |                    |              |      |       |         |
| MR Egger                        | 0.039   | 0.187          | 0.835 | 0               | 0.998              | 443.688      | 440  | 0.442 | 0.831   |
| Weighted median                 | -0.051  | 0.124          | 0.68  |                 |                    |              |      |       |         |
| Inverse variance weighted       | 0.039   | 0.071          | 0.59  |                 |                    | 443.688      | 441  | 0.455 | 0.606   |
| Simple mode                     | -0.153  | 0.319          | 0.631 |                 |                    |              |      |       |         |
| Weighted mode                   | -0.071  | 0.201          | 0.725 |                 |                    |              |      |       |         |
| <b>Coronary Artery Disease</b>  |         |                |       |                 |                    |              |      |       |         |
| MR Egger                        | -0.148  | 0.158          | 0.364 | 0.018           | 0.362              | 28.509       | 16   | 0.027 | 43.876  |
| Weighted median                 | -0.076  | 0.072          | 0.29  |                 |                    |              |      |       |         |
| Inverse variance weighted       | -0.015  | 0.069          | 0.833 |                 |                    | 30.077       | 17   | 0.026 | 43.478  |
| Simple mode                     | 0.012   | 0.113          | 0.914 |                 |                    |              |      |       |         |
| Weighted mode                   | -0.062  | 0.073          | 0.402 |                 |                    |              |      |       |         |
| <b>High-Density Lipoprotein</b> |         |                |       |                 |                    |              |      |       |         |
| MR Egger                        | -0.099  | 0.137          | 0.472 | 0.001           | 0.814              | 118.475      | 107  | 0.211 | 9.686   |
| Weighted median                 | 0.021   | 0.139          | 0.879 |                 |                    |              |      |       |         |
| Inverse variance weighted       | -0.075  | 0.09           | 0.41  |                 |                    | 118.537      | 108  | 0.23  | 8.889   |
| Simple mode                     | 0.107   | 0.308          | 0.729 |                 |                    |              |      |       |         |
| Weighted mode                   | -0.002  | 0.128          | 0.985 |                 |                    |              |      |       |         |
| <b>Hypertension</b>             |         |                |       |                 |                    |              |      |       |         |
| MR Egger                        | -8.389  | 4.82           | 0.101 | 0.053           | 0.05               | 10.698       | 16   | 0.828 | -49.557 |
| Weighted median                 | 1.143   | 1.421          | 0.421 |                 |                    |              |      |       |         |
| Inverse variance weighted       | 1.569   | 1.075          | 0.144 |                 |                    | 15.19        | 17   | 0.582 | -11.915 |
| Simple mode                     | 0.38    | 2.21           | 0.865 |                 |                    |              |      |       |         |

|                           |        |       |        |       |       |         |     |       |          |
|---------------------------|--------|-------|--------|-------|-------|---------|-----|-------|----------|
| Weighted mode             | 0.061  | 2.13  | 0.978  |       |       |         |     |       |          |
| Leg Fat Percent Left      |        |       |        |       |       |         |     |       |          |
| MR Egger                  | -0.772 | 0.759 | 0.311  | 0.007 | 0.373 | 121.152 | 132 | 0.741 | -8.954   |
| Weighted median           | -0.115 | 0.289 | 0.691  |       |       |         |     |       |          |
| Inverse variance weighted | -0.119 | 0.203 | 0.558  |       |       | 121.949 | 133 | 0.744 | -9.062   |
| Simple mode               | -0.302 | 0.756 | 0.69   |       |       |         |     |       |          |
| Weighted mode             | -0.227 | 0.593 | 0.703  |       |       |         |     |       |          |
| Leg Fat Percent Right     |        |       |        |       |       |         |     |       |          |
| MR Egger                  | -0.596 | 0.591 | 0.315  | 0.007 | 0.286 | 129.508 | 129 | 0.471 | 0.392    |
| Weighted median           | -0.182 | 0.34  | 0.592  |       |       |         |     |       |          |
| Inverse variance weighted | 0.001  | 0.196 | 0.996  |       |       | 130.659 | 130 | 0.467 | 0.505    |
| Simple mode               | -0.466 | 0.674 | 0.491  |       |       |         |     |       |          |
| Weighted mode             | -0.278 | 0.469 | 0.554  |       |       |         |     |       |          |
| Liver Fat                 |        |       |        |       |       |         |     |       |          |
| MR Egger                  |        |       |        |       |       |         |     |       |          |
| Weighted median           |        |       |        |       |       |         |     |       |          |
| Inverse variance weighted | -0.065 | 0.34  | 0.847  |       |       | 0.026   | 1   | 0.873 | -3820.94 |
| Simple mode               |        |       |        |       |       |         |     |       |          |
| Weighted mode             |        |       |        |       |       |         |     |       |          |
| Type 2 Diabetes           |        |       |        |       |       |         |     |       |          |
| MR Egger                  | -0.369 | 0.089 | <0.001 | 0.012 | 0.074 | 130.029 | 95  | 0.01  | 26.939   |
| Weighted median           | -0.215 | 0.07  | 0.002  |       |       |         |     |       |          |
| Inverse variance weighted | -0.226 | 0.04  | <0.001 |       |       | 134.482 | 96  | 0.006 | 28.615   |
| Simple mode               | -0.108 | 0.168 | 0.522  |       |       |         |     |       |          |
| Weighted mode             | -0.183 | 0.074 | 0.015  |       |       |         |     |       |          |
| Triglycerides             |        |       |        |       |       |         |     |       |          |

|                                     |        |       |       |       |       |         |     |       |        |
|-------------------------------------|--------|-------|-------|-------|-------|---------|-----|-------|--------|
| MR Egger                            | -0.113 | 0.146 | 0.44  | 0.003 | 0.506 | 102.388 | 100 | 0.415 | 2.332  |
| Weighted median                     | -0.025 | 0.145 | 0.865 |       |       |         |     |       |        |
| Inverse variance weighted           | -0.038 | 0.093 | 0.681 |       |       | 102.844 | 101 | 0.43  | 1.793  |
| Simple mode                         | -0.161 | 0.296 | 0.589 |       |       |         |     |       |        |
| Weighted mode                       | -0.04  | 0.124 | 0.747 |       |       |         |     |       |        |
| <b>BMI-adjusted Waist-Hip Ratio</b> |        |       |       |       |       |         |     |       |        |
| MR Egger                            | -0.382 | 0.323 | 0.239 | 0.009 | 0.175 | 156.341 | 140 | 0.163 | 10.452 |
| Weighted median                     | 0.102  | 0.166 | 0.541 |       |       |         |     |       |        |
| Inverse variance weighted           | 0.031  | 0.113 | 0.782 |       |       | 158.419 | 141 | 0.15  | 10.996 |
| Simple mode                         | 0.536  | 0.461 | 0.247 |       |       |         |     |       |        |
| Weighted mode                       | 0.358  | 0.409 | 0.383 |       |       |         |     |       |        |

# STROBE-MR checklist of recommended items to address in reports of Mendelian randomization studies<sup>1</sup>

| Item No.            | Section                                   | Checklist item                                                                                                                                                                                                                            | Page No. | Relevant text from manuscript                                                                                                                                                                                                                                                                                                                                                                                                                                                                                                    |
|---------------------|-------------------------------------------|-------------------------------------------------------------------------------------------------------------------------------------------------------------------------------------------------------------------------------------------|----------|----------------------------------------------------------------------------------------------------------------------------------------------------------------------------------------------------------------------------------------------------------------------------------------------------------------------------------------------------------------------------------------------------------------------------------------------------------------------------------------------------------------------------------|
| 1                   | <b>TITLE and ABSTRACT</b>                 | Indicate Mendelian randomization (MR) as the study's design in the title and/or the abstract if that is a main purpose of the study                                                                                                       | Pg. 1:   | Title "Insulin response to oral glucose and cardiometabolic disease: A Mendelian randomization study to assess potential causality"                                                                                                                                                                                                                                                                                                                                                                                              |
| <b>INTRODUCTION</b> |                                           |                                                                                                                                                                                                                                           |          |                                                                                                                                                                                                                                                                                                                                                                                                                                                                                                                                  |
| 2                   | <b>Background</b>                         | Explain the scientific background and rationale for the reported study. What is the exposure? Is a potential causal relationship between exposure and outcome plausible? Justify why MR is a helpful method to address the study question | Pg. 3:   | Obesity is a growing problem worldwide and is associated with cardiometabolic disease. Post-prandial hyperinsulinemia has been linked to weight gain. Two sample MR can be used to infer causality between an exposure and an outcome using genetic variants associated with the exposure as an instrument. A previous MR study supported a causal association between insulin levels at 30-minutes post glucose challenge and body mass index. Whether this translates to increased cardiometabolic disease is not established. |
| 3                   | <b>Objectives</b>                         | State specific objectives clearly, including pre-specified causal hypotheses (if any). State that MR is a method that, under specific assumptions, intends to estimate causal effects                                                     | Pg. 3-4: | We have undertaken bi-directional MR analysis on summary level data from participants of European descent to assess potential causal relationships between CIR, BMI and cardiometabolic phenotypes.                                                                                                                                                                                                                                                                                                                              |
| <b>METHODS</b>      |                                           |                                                                                                                                                                                                                                           |          |                                                                                                                                                                                                                                                                                                                                                                                                                                                                                                                                  |
| 4                   | <b>Study design and data sources</b>      | Present key elements of the study design early in the article. Consider including a table listing sources of data for all phases of the study. For each data source contributing to the analysis, describe the following:                 | Pg. 4-5: | Bi-directional MR was used to assess causal associations between CIR (based on 8 genome-wide significant SNPs in the MAGIC cohort of up to 26,037 participants without T2D) and BMI from published summary statistics from GIANT-UK Biobank cohort. We also assessed whether CIR affects WHR (adjusted and unadjusted for BMI), leg fat (assessed by impedance), liver fat (assessed by MR), T2D, plasma TG and HDL, hypertension and CAD. Cohort details are provided in Table 1.                                               |
|                     | a)                                        | Setting: Describe the study design and the underlying population, if possible. Describe the setting, locations, and relevant dates, including periods of recruitment, exposure, follow-up, and data collection, when available.           | Pg. 4-5: | PMID for original GWAS/cohorts provided in Table 1.                                                                                                                                                                                                                                                                                                                                                                                                                                                                              |
|                     | b)                                        | Participants: Give the eligibility criteria, and the sources and methods of selection of participants. Report the sample size, and whether any power or sample size calculations were carried out prior to the main analysis              | Pg. 4-5: | Genetic variants that were significant at p-value threshold of 5x10 <sup>-8</sup> in meta-GWAS were used in the instrument; effect size and standard error was also calculated from these meta-GWAS.                                                                                                                                                                                                                                                                                                                             |
|                     | c)                                        | Describe measurement, quality control and selection of genetic variants                                                                                                                                                                   | Pg. 4-5: | As describe above in (a).                                                                                                                                                                                                                                                                                                                                                                                                                                                                                                        |
|                     | d)                                        | For each exposure, outcome, and other relevant variables, describe methods of assessment and diagnostic criteria for diseases                                                                                                             |          |                                                                                                                                                                                                                                                                                                                                                                                                                                                                                                                                  |
|                     | e)                                        | Provide details of ethics committee approval and participant informed consent, if relevant                                                                                                                                                |          | Not applicable.                                                                                                                                                                                                                                                                                                                                                                                                                                                                                                                  |
| 5                   | <b>Assumptions</b>                        | Explicitly state the three core IV assumptions for the main analysis (relevance, independence and exclusion restriction) as well as assumptions for any additional or sensitivity analysis                                                | Pg. 5:   | The first assumption is that the instrument is associated with the exposure, therefore we used SNPs that were associated with the exposure at genome-wide significance. Second that the instrument does not influence the outcome via another pathway other than the outcome (horizontal pleiotropy). Third, there are no confounders associated with the instrument.                                                                                                                                                            |
| 6                   | <b>Statistical methods: main analysis</b> | Describe statistical methods and statistics used                                                                                                                                                                                          |          |                                                                                                                                                                                                                                                                                                                                                                                                                                                                                                                                  |

|                |                                                     |                                                                                                                                                                                                                                      |                                                                                                                                                                                                                                                                                              |
|----------------|-----------------------------------------------------|--------------------------------------------------------------------------------------------------------------------------------------------------------------------------------------------------------------------------------------|----------------------------------------------------------------------------------------------------------------------------------------------------------------------------------------------------------------------------------------------------------------------------------------------|
|                | a)                                                  | Describe how quantitative variables were handled in the analyses (i.e., scale, units, model)                                                                                                                                         | Pg. 6-9: Betas are provided for continuous variables and odds ratios for binary traits.                                                                                                                                                                                                      |
|                | b)                                                  | Describe how genetic variants were handled in the analyses and, if applicable, how their weights were selected                                                                                                                       | Pg. 4: Genetic variants were weighted based on effect size in prior meta-GWAS.                                                                                                                                                                                                               |
|                | c)                                                  | Describe the MR estimator (e.g. two-stage least squares, Wald ratio) and related statistics. Detail the included covariates and, in case of two-sample MR, whether the same covariate set was used for adjustment in the two samples | Pg. 5-6: Univariable MR using an inverse variance weighted (IVW) approach, i.e. meta-analysis of the individual Wald ratio for each SNP was conducted to assess potential causality between traits.                                                                                          |
|                | d)                                                  | Explain how missing data were addressed                                                                                                                                                                                              | Pg. 5: If the SNP was not matched directly, LD pruning was used to select a proxy ( $r^2 > 0.8$ ).                                                                                                                                                                                           |
|                | e)                                                  | If applicable, indicate how multiple testing was addressed                                                                                                                                                                           | Pg. 10: These tests were hypothesis driven and the traits are correlated. A Bonferroni correction is likely over-conservative (p-value threshold of 0.0042 for 12 tests), where only increased CIR and reduced T2D/TG remain significant. The other data should be interpreted with caution. |
| 7              | <b>Assessment of assumptions</b>                    | Describe any methods or prior knowledge used to assess the assumptions or justify their validity                                                                                                                                     | Pg. 3: Pre-clinical studies have indicated that hyperinsulinemia may cause cardiometabolic disease. Prior MR also suggested post-prandial hyperinsulinemia increases BMI.                                                                                                                    |
| 8              | <b>Sensitivity analyses and additional analyses</b> | Describe any sensitivity analyses or additional analyses performed (e.g. comparison of effect estimates from different approaches, independent replication, bias analytic techniques, validation of instruments, simulations)        | Pg. 5-6: Sensitivity analyses included MR Egger, weighted median and weighted mode as well as tests of heterogeneity (Cochrane's Q test) and leave-one-out analyses.                                                                                                                         |
| 9              | <b>Software and pre-registration</b>                |                                                                                                                                                                                                                                      | TwoSampleMR package in R (R studio® v1.3.1073 and R® v4.0.3), with January 2020 update                                                                                                                                                                                                       |
| <b>RESULTS</b> | a)                                                  | Name statistical software and package(s), including version and settings used                                                                                                                                                        | The study was not pre-registered.                                                                                                                                                                                                                                                            |
|                | b)                                                  | State whether the study protocol and details were pre-registered (as well as when and where)                                                                                                                                         |                                                                                                                                                                                                                                                                                              |
|                |                                                     |                                                                                                                                                                                                                                      |                                                                                                                                                                                                                                                                                              |
|                |                                                     |                                                                                                                                                                                                                                      |                                                                                                                                                                                                                                                                                              |
|                |                                                     |                                                                                                                                                                                                                                      |                                                                                                                                                                                                                                                                                              |
| 10             | <b>Descriptive data</b>                             |                                                                                                                                                                                                                                      |                                                                                                                                                                                                                                                                                              |
|                | a)                                                  | Report the numbers of individuals at each stage of included studies and reasons for exclusion. Consider use of a flow diagram                                                                                                        | Cohort details in Table 1.                                                                                                                                                                                                                                                                   |
|                | b)                                                  | Report summary statistics for phenotypic exposure(s), outcome(s), and other relevant variables (e.g. means, SDs, proportions)                                                                                                        | Cohort details in Table 1.                                                                                                                                                                                                                                                                   |
|                | c)                                                  | If the data sources include meta-analyses of previous studies, provide the assessments of heterogeneity across these studies                                                                                                         | Cohort details in Table 1: PMID to original GWAS studies are provided.                                                                                                                                                                                                                       |
|                | d)                                                  | For two-sample MR: <ol style="list-style-type: none"> <li>Provide justification of the similarity of the genetic variant-exposure associations between the exposure and outcome samples</li> </ol>                                   | Cohort details in Table 1: exposure and outcome samples have similar mean age and %female.                                                                                                                                                                                                   |

|    |                                                     |                                                                                                                                                                                                                                        |                                                                                                                                                                                                                                                                                                                                                                                                                                                                          |
|----|-----------------------------------------------------|----------------------------------------------------------------------------------------------------------------------------------------------------------------------------------------------------------------------------------------|--------------------------------------------------------------------------------------------------------------------------------------------------------------------------------------------------------------------------------------------------------------------------------------------------------------------------------------------------------------------------------------------------------------------------------------------------------------------------|
| 11 | <b>Main results</b>                                 | ii. Provide information on the number of individuals who overlap between the exposure and outcome studies                                                                                                                              | Pg. 4-5: MAGIC included 13 discovery GWAS, of which 24.5% of exposure cohort were also part of the GIANT consortium (2.8%) and some UK ~2000 participants, ~0.4% may potentially have participated in the UK Biobank study.                                                                                                                                                                                                                                              |
|    |                                                     | a) Report the associations between genetic variant and exposure, and between genetic variant and outcome, preferably on an interpretable scale                                                                                         | Pg. 6-9: Associations were reported as exposure increases or reduces the outcome.                                                                                                                                                                                                                                                                                                                                                                                        |
|    |                                                     | b) Report MR estimates of the relationship between exposure and outcome, and the measures of uncertainty from the MR analysis, on an interpretable scale, such as odds ratio or relative risk per SD difference                        | Pg. 6-9: MR estimates were provided as beta +/- standard error with p-value for continuous variables (Table 3). For binary variables, odds ratio was also provided (Table 4).                                                                                                                                                                                                                                                                                            |
|    |                                                     | c) If relevant, consider translating estimates of relative risk into absolute risk for a meaningful time period                                                                                                                        | Not applicable.                                                                                                                                                                                                                                                                                                                                                                                                                                                          |
|    |                                                     | d) Consider plots to visualize results (e.g. forest plot, scatterplot of associations between genetic variants and outcome versus between genetic variants and exposure)                                                               | Scatter, funnel, forest and leave-one-out plots were provided for significant associations (Figures 1-5).                                                                                                                                                                                                                                                                                                                                                                |
| 12 | <b>Assessment of assumptions</b>                    | a) Report the assessment of the validity of the assumptions                                                                                                                                                                            | MR-Egger intercept with p-value was reported as a measure of horizontal pleiotropy for all significant associations (Tables 3-4).                                                                                                                                                                                                                                                                                                                                        |
|    |                                                     | b) Report any additional statistics (e.g., assessments of heterogeneity across genetic variants, such as $I^2$ , Q statistic or E-value)                                                                                               | Pg. 6-9: Cochran's Q statistic and I2 values were provided for significant associations (Tables 3-4).                                                                                                                                                                                                                                                                                                                                                                    |
| 13 | <b>Sensitivity analyses and additional analyses</b> | a) Report any sensitivity analyses to assess the robustness of the main results to violations of the assumptions                                                                                                                       | Pg. 6-9: MR-Egger, weighted-median and weighted-mode analyses were also conducted (Tables 3-4).                                                                                                                                                                                                                                                                                                                                                                          |
|    |                                                     | b) Report results from other sensitivity analyses or additional analyses                                                                                                                                                               | Pg. 6-9: Visualization of the scatter and funnel plots, and leave-one-out analyses were also completed (Figures 1-5).                                                                                                                                                                                                                                                                                                                                                    |
|    |                                                     | c) Report any assessment of direction of causal relationship (e.g., bidirectional MR)                                                                                                                                                  | Pg. 6-7: Bidirectional MR was completed for CIR and BMI, with only a significant causal association for CIR on BMI.                                                                                                                                                                                                                                                                                                                                                      |
|    |                                                     | d) When relevant, report and compare with estimates from non-MR analyses                                                                                                                                                               | Not applicable.                                                                                                                                                                                                                                                                                                                                                                                                                                                          |
|    |                                                     | e) Consider additional plots to visualize results (e.g., leave-one-out analyses)                                                                                                                                                       | Figures 1-5.                                                                                                                                                                                                                                                                                                                                                                                                                                                             |
| 14 | <b>DISCUSSION</b>                                   |                                                                                                                                                                                                                                        |                                                                                                                                                                                                                                                                                                                                                                                                                                                                          |
|    | <b>Key results</b>                                  | Summarize key results with reference to study objectives                                                                                                                                                                               | Pg. 10: Our data suggests that increased CIR may modestly increase BMI, may promote favourable fat distribution (increased leg fat mass with no change in WHR or liver fat), reduce T2D and improve lipids (reduced TG and increased HDL) with neutral effects on hypertension and coronary artery disease.                                                                                                                                                              |
| 15 | <b>Limitations</b>                                  | Discuss limitations of the study, taking into account the validity of the IV assumptions, other sources of potential bias, and imprecision. Discuss both direction and magnitude of any potential bias and any efforts to address them | Pg. 13: Findings may not apply to other ethnic groups and we did not undertake analysis by sex. Unlike other complex traits, relatively few SNPs have been associated with post-OGTT insulin and a larger sample size may permit more robust inferences given the pleiotropic effects of some SNPs in the MR instrument. Further, we do not have longitudinal data on participants. We also did not assess the interaction between dietary macronutrient intake and CIR. |



|                          |                              |                                                                                                                                                                                                                                                                                                                                                                                                                                                                                                                                                                                                                                                                                                                                                                                                                                                                                                                                                                                                                                                                                                                                                                            |                                                                                                                                                                                                                                                                                                                                                                                                                                                                                                                                                                                                                                                                                                                                                                                                                                                                         |
|--------------------------|------------------------------|----------------------------------------------------------------------------------------------------------------------------------------------------------------------------------------------------------------------------------------------------------------------------------------------------------------------------------------------------------------------------------------------------------------------------------------------------------------------------------------------------------------------------------------------------------------------------------------------------------------------------------------------------------------------------------------------------------------------------------------------------------------------------------------------------------------------------------------------------------------------------------------------------------------------------------------------------------------------------------------------------------------------------------------------------------------------------------------------------------------------------------------------------------------------------|-------------------------------------------------------------------------------------------------------------------------------------------------------------------------------------------------------------------------------------------------------------------------------------------------------------------------------------------------------------------------------------------------------------------------------------------------------------------------------------------------------------------------------------------------------------------------------------------------------------------------------------------------------------------------------------------------------------------------------------------------------------------------------------------------------------------------------------------------------------------------|
| 16                       | <b>Interpretation</b>        | <p>Pg. 12: We suggest that post-prandial hyperinsulinemia per se is likely not deleterious to cardiometabolic health in the absence of compromised adipose storage/increased lipid flux and/or hyperglycemia. The data does not support a causal role for CIR in cardiometabolic disease. There may be some metabolically beneficial effects of increased CIR but given multiple testing, we have explicitly stated that caution should be applied in interpreting the results.</p> <p>a) Meaning: Give a cautious overall interpretation of results in the context of their limitations and in comparison with other studies</p> <p>b) Mechanism: Discuss underlying biological mechanisms that could drive a potential causal relationship between the investigated exposure and the outcome, and whether the gene-environment equivalence assumption is reasonable. Use causal language carefully, clarifying that IV estimates may provide causal effects only under certain assumptions</p> <p>c) Clinical relevance: Discuss whether the results have clinical or public policy relevance, and to what extent they inform effect sizes of possible interventions</p> | <p>Pg. 12: We suggest that post-prandial hyperinsulinemia per se is likely not deleterious to cardiometabolic health in the absence of compromised adipose storage/increased lipid flux and/or hyperglycemia. The data does not support a causal role for CIR in cardiometabolic disease. There may be some metabolically beneficial effects of increased CIR but given multiple testing, we have explicitly stated that caution should be applied in interpreting the results.</p> <p>In the discussion (pg. 9-12), we have discussed potential mechanisms including potential effects mediated by horizontal pleiotropy by analyses of individual SNPs in the instrument, as well as the evidence from prior studies.</p> <p>Not applicable. As we did not assess dietary exposure, implications re: public policy/clinical management decisions can not be made.</p> |
| 17                       | <b>Generalizability</b>      | Discuss the generalizability of the study results (a) to other populations, (b) across other exposure periods/timings, and (c) across other levels of exposure                                                                                                                                                                                                                                                                                                                                                                                                                                                                                                                                                                                                                                                                                                                                                                                                                                                                                                                                                                                                             | <p>Pg. 13: The study provides insight into the effects of hyperinsulinemia on cardiometabolic disease, however is limited in its generalizability due to: small sample size, only European ethnicity, non-diabetic population and lack of macronutrient data as detailed in the limitations. We also do not have longer-term outcomes. Many people with increased weight can transition from metabolically healthy to unhealthy status over time.</p>                                                                                                                                                                                                                                                                                                                                                                                                                   |
| <b>OTHER INFORMATION</b> |                              |                                                                                                                                                                                                                                                                                                                                                                                                                                                                                                                                                                                                                                                                                                                                                                                                                                                                                                                                                                                                                                                                                                                                                                            |                                                                                                                                                                                                                                                                                                                                                                                                                                                                                                                                                                                                                                                                                                                                                                                                                                                                         |
| 18                       | <b>Funding</b>               | Describe sources of funding and the role of funders in the present study and, if applicable, sources of funding for the databases and original study or studies on which the present study is based                                                                                                                                                                                                                                                                                                                                                                                                                                                                                                                                                                                                                                                                                                                                                                                                                                                                                                                                                                        | <p>Pg. 14: SD is funded by CIHR, Heart &amp; Stroke Foundation of Canada, Diabetes Canada and Banting &amp; Best Diabetes Centre (DH Gales Family Charitable Foundation New Investigator Award and a Reuben &amp; Helene Dennis Scholar in Diabetes Research).</p>                                                                                                                                                                                                                                                                                                                                                                                                                                                                                                                                                                                                      |
| 19                       | <b>Data and data sharing</b> | Provide the data used to perform all analyses or report where and how the data can be accessed, and reference these sources in the article. Provide the statistical code needed to reproduce the results in the article, or report whether the code is publicly accessible and if so, where                                                                                                                                                                                                                                                                                                                                                                                                                                                                                                                                                                                                                                                                                                                                                                                                                                                                                | <p>All data used in this study is public access. PMID/GWAS id for cohorts are provided in Table 1. TwoSampleMR R code is also publicly available.</p>                                                                                                                                                                                                                                                                                                                                                                                                                                                                                                                                                                                                                                                                                                                   |
| 20                       | <b>Conflicts of Interest</b> | All authors should declare all potential conflicts of interest                                                                                                                                                                                                                                                                                                                                                                                                                                                                                                                                                                                                                                                                                                                                                                                                                                                                                                                                                                                                                                                                                                             | No conflicts of interests.                                                                                                                                                                                                                                                                                                                                                                                                                                                                                                                                                                                                                                                                                                                                                                                                                                              |

This checklist is copyrighted by the Equator Network under the Creative Commons Attribution 3.0 Unported (CC BY 3.0) license.

1. Skrivankova VW, Richmond RC, Woolf BAR, et al. Strengthening the Reporting of Observational Studies in Epidemiology using Mendelian Randomisation (STROBE-MR): Explanation and Elaboration. *BMJ*. 2021;375:n2233.
